# Supplementary material for: Tetrandrine-driven autophagy suppresses SARS-CoV-2 replication by modulating cholesterol and IGF signaling pathways
Source: Cell Death Discov. 2026 Jan 6;12:82. doi: 10.1038/s41420-025-02926-7 (PMC12877079; doi:10.1038/s41420-025-02926-7)
Supplement: Supplementary file 1 — Supplementary Table [file 41420_2025_2926_MOESM1_ESM.xlsx]

## Sheet: SARS_COV2_DIA
Quantities are reported as log2
Not Infected									SARS-CoV2 24hrs
Untreated			Tetrandrine 5uM			Tetrandrinet 10uM			Untreated			Tetrandrine pre-tratment 5uM			Tetrandrine pre-tratment 10uM
Sample1	Sample2	Sample3	Sample1	Sample2	Sample3	Sample1	Sample2	Sample3	Sample1	Sample2	Sample3	Sample1	Sample2	Sample3	Sample1	Sample2	Sample3
UWO1.PG.Quantity	UWO2.PG.Quantity	UWO3.PG.Quantity	T5WO1.PG.Quantity	T5WO2.PG.Quantity	T5WO3.PG.Quantity	T10WO1.PG.Quantity	T10WO2.PG.Quantity	T10WO3.PG.Quantity	UW1.PG.Quantity	UW2.PG.Quantity	UW3.PG.Quantity	T5W1.PG.Quantity	T5W2.PG.Quantity	T5W3.PG.Quantity	T10W1.PG.Quantity	T10W2.PG.Quantity	T10W3.PG.Quantity	C: PG.Organisms	T: id	T: PG.FastaHeaders	T: PG.Genes	T: PG.MolecularWeight	T: PG.ProteinAccessions	T: PG.UniProtIds	T: PG.NrOfPrecursorsIdentified (Experiment-wide)	T: PG.Qvalue
7.46665	7.2566	7.19801	7.12258	7.47964	6.69672	7.80041	7.6897	8.96311	7.99965	8.28281	7.60017	7.98442	9.42627	8.40511	8.33296	8.41668	7.22374	Homo sapiens	0	>tr|A0A087WV96|A0A087WV96_HUMAN Protein CYP3A7-CYP3A51P OS=Homo sapiens GN=CYP3A7-CYP3A51P PE=3 SV=1;>sp|P24462|CP3A7_HUMAN Cytochrome P450 3A7 OS=Homo sapiens GN=CYP3A7 PE=1 SV=2	CYP3A7-CYP3A51P;CYP3A7	57433.44;57525.54	A0A087WV96;P24462	A0A087WV96;P24462	2	0.000342818
12.7583	12.3678	11.4556	13.2148	12.3445	11.3803	12.7977	13.3447	13.6013	13.0424	13.1946	13.5315	14.3238	13.205	13.7004	13.766	13.4804	13.2743	Homo sapiens	1	>tr|A0A096LP75|A0A096LP75_HUMAN Protein LOC102723897 OS=Homo sapiens GN=LOC102723897 PE=4 SV=1;>sp|C4AMC7|WASH3_HUMAN Putative WAS protein family homolog 3 OS=Homo sapiens GN=WASH3P PE=1 SV=2;>sp|Q6VEQ5|WASH2_HUMAN WAS protein family homolog 2 OS=Homo sapiens GN=WASH2P PE=2 SV=2	LOC102723897;WASH3P;WASH2P	50073.72;49994.54;50312.01	A0A096LP75;C4AMC7;Q6VEQ5	A0A096LP75;C4AMC7;Q6VEQ5	4	0
17.7166	17.7652	17.6467	17.8113	17.5656	17.3916	17.3036	17.2924	17.7146	15.7636	15.2616	15.7537	16.0023	16.4258	16.2497	15.8435	15.7129	15.5014	Homo sapiens	2	>tr|A0A0A6YYL6|A0A0A6YYL6_HUMAN Protein RPL17-C18orf32 OS=Homo sapiens GN=RPL17-C18orf32 PE=3 SV=1;>sp|P18621|RL17_HUMAN 60S ribosomal protein L17 OS=Homo sapiens GN=RPL17 PE=1 SV=3	RPL17-C18orf32;RPL17	26372.69;21397.02	A0A0A6YYL6;P18621	A0A0A6YYL6;P18621	12	0
13.0741	13.2616	12.843	14.1008	13.1237	12.6495	13.2268	12.7748	13.0945	12.1296	11.7087	13.5768	11.9439	12.6824	13.7902	11.7464	12.2384	8.85777	Homo sapiens	3	>tr|A0A0B4J1V8|A0A0B4J1V8_HUMAN HCG2039996 OS=Homo sapiens GN=PPAN-P2RY11 PE=3 SV=1;>sp|Q9NQ55|SSF1_HUMAN Suppressor of SWI4 1 homolog OS=Homo sapiens GN=PPAN PE=2 SV=1	PPAN-P2RY11;PPAN	87917.8;53193.88	A0A0B4J1V8;Q9NQ55	A0A0B4J1V8;Q9NQ55	5	0
13.4765	13.248	13.5064	14.5321	14.0033	13.3419	13.589	12.7022	13.5785	13.4587	14.163	13.8298	12.9253	14.6103	13.6921	14.0817	14.1486	14.1719	Homo sapiens	4	>tr|A0A0B4J203|A0A0B4J203_HUMAN Uncharacterized protein OS=Homo sapiens PE=4 SV=1;>sp|Q6UN15|FIP1_HUMAN Pre-mRNA 3'-end-processing factor FIP1 OS=Homo sapiens GN=FIP1L1 PE=1 SV=1	;FIP1L1	94703.59;66526.39	A0A0B4J203;Q6UN15	A0A0B4J203;Q6UN15	4	0
10.3423	9.60269	9.81981	10.1689	8.46329	10.3499	10.6776	9.65769	10.6667	9.72692	8.25041	8.00471	10.3213	10.04	9.71838	6.7157	7.51565	8.56188	Homo sapiens	5	>tr|A0A0B4J2E5|A0A0B4J2E5_HUMAN Protein LOC102724159 OS=Homo sapiens GN=LOC102724159 PE=1 SV=1;>sp|Q15269|PWP2_HUMAN Periodic tryptophan protein 2 homolog OS=Homo sapiens GN=PWP2 PE=2 SV=2	LOC102724159;PWP2	102451.08;102452.07	A0A0B4J2E5;Q15269	A0A0B4J2E5;Q15269	6	0.001318392
8.35165	7.77404	6.07885	9.56027	7.83186	8.82859	8.92963	6.87271	6.91579	6.70342	8.9073	7.32605	9.36681	7.39463	8.09126	8.08646	5.91147	7.76772	Homo sapiens	6	>tr|A0A0U1RQK1|A0A0U1RQK1_HUMAN Uncharacterized protein (Fragment) OS=Homo sapiens PE=4 SV=1;>sp|A2RRD8|ZN320_HUMAN Zinc finger protein 320 OS=Homo sapiens GN=ZNF320 PE=1 SV=1;>sp|A6NHJ4|ZN860_HUMAN Zinc finger protein 860 OS=Homo sapiens GN=ZNF860 PE=2 SV=3;>sp|P0CJ79|ZN888_HUMAN Zinc finger protein 888 OS=Homo sapiens GN=ZNF888 PE=3 SV=1;>sp|P17035|ZNF28_HUMAN Zinc finger protein 28 OS=Homo sap…	;ZNF320;ZNF860;ZNF888;ZNF28;ZNF91;ZNF816;ZNF468;ZNF813;ZNF765;ZNF761;ZNF808;ZNF525;ZFP62;ZNF485;ZNF845;ZNF578;ZNF599;ZNF702P;ZNF701;ZKSCAN7;ZNF229;ZSCAN21	56824.6;59326.41;73756.67;58726.98;83658.38;137217.32;75725.33;60572.83;71720.54;61633.45;87719.05;104824.69;23070.13;102511.06;50280.38;113132.63;68530.68;67491.73;15019.38;60903.07;85033.09;93707.32;53658.48	A0A0U1RQK1;A2RRD8;A6NHJ4;P0CJ79;P17035;Q05481;Q0VGE8;Q5VIY5;Q6ZN06;Q7L2R6;Q86XN6;Q8N4W9;Q8N782;Q8NB50;Q8NCK3;Q96IR2;Q96N58;Q96NL3;Q9H963;Q9NV72;Q9P0L1;Q9UJW7;Q9Y5A6	A0A0U1RQK1;A2RRD8;A6NHJ4;P0CJ79;P17035;Q05481;Q0VGE8;Q5VIY5;Q6ZN06;Q7L2R6;Q86XN6;Q8N4W9;Q8N782;Q8NB50;Q8NCK3;Q96IR2;Q96N58;Q96NL3;Q9H963;Q9NV72;Q9P0L1;Q9UJW7;Q9Y5A6	1	0
17.5024	17.8866	17.4101	17.5188	17.8338	16.5934	17.449	17.6401	17.123	18.3427	18.1546	16.8408	16.2305	16.576	17.0728	17.1137	16.9242	17.7573	Homo sapiens	7	>tr|A0A0U1RRH7|A0A0U1RRH7_HUMAN Histone H2A OS=Homo sapiens PE=3 SV=1;>sp|P04908|H2A1B_HUMAN Histone H2A type 1-B/E OS=Homo sapiens GN=HIST1H2AB PE=1 SV=2;>sp|P20671|H2A1D_HUMAN Histone H2A type 1-D OS=Homo sapiens GN=HIST1H2AD PE=1 SV=2;>sp|Q7L7L0|H2A3_HUMAN Histone H2A type 3 OS=Homo sapiens GN=HIST3H2A PE=1 SV=3	;HIST1H2AB;HIST1H2AD;HIST3H2A	18552.64;14135.49;14107.48;14121.46	A0A0U1RRH7;P04908;P20671;Q7L7L0	A0A0U1RRH7;P04908;P20671;Q7L7L0	7	0
8.35712	7.10251	6.18231	10.9059	7.67076	8.80459	8.96963	7.20143	7.46372	10.843	10.001	10.4839	11.891	9.43129	11.2231	9.27484	7.79676	7.91194	Homo sapiens	8	>sp|A0AV96|RBM47_HUMAN RNA-binding protein 47 OS=Homo sapiens GN=RBM47 PE=1 SV=2	RBM47	64099.08	A0AV96	A0AV96	3	0.001318392
11.1566	11.4113	11.2499	11.5346	10.9522	11.6307	10.9094	11.2536	10.9152	13.0066	12.5114	12.8598	12.8552	13.0854	13.0212	12.2571	12.8088	12.3813	Homo sapiens	9	>sp|A0AVT1|UBA6_HUMAN Ubiquitin-like modifier-activating enzyme 6 OS=Homo sapiens GN=UBA6 PE=1 SV=1	UBA6	117969.97	A0AVT1	A0AVT1	8	0
13.0543	13.3172	12.885	13.3856	13.7665	13.6137	13.4997	13.3632	13.2572	13.6049	13.5282	13.1271	13.5488	13.7878	13.7767	13.7371	13.8224	14.1108	Homo sapiens	10	>sp|A0FGR8|ESYT2_HUMAN Extended synaptotagmin-2 OS=Homo sapiens GN=ESYT2 PE=1 SV=1	ESYT2	102357.48	A0FGR8	A0FGR8	11	0
7.23525	7.56938	6.69638	8.42585	7.38711	7.06046	8.37488	7.62101	8.88353	9.5657	7.9607	8.03875	9.9505	9.05646	8.21888	8.20013	7.13589	9.67706	Homo sapiens	11	>sp|A1L0T0|ILVBL_HUMAN Acetolactate synthase-like protein OS=Homo sapiens GN=ILVBL PE=1 SV=2	ILVBL	67867.74	A1L0T0	A1L0T0	2	0
11.4004	10.349	11.3115	9.20025	12.1684	11.3981	12.7675	12.5602	11.0245	11.5532	10.9726	10.6699	12.0447	12.5747	13.0302	13.2263	13.3487	13.16	Homo sapiens	12	>sp|A1X283|SPD2B_HUMAN SH3 and PX domain-containing protein 2B OS=Homo sapiens GN=SH3PXD2B PE=1 SV=3	SH3PXD2B	101579.09	A1X283	A1X283	2	0
11.5318	11.268	10.8931	11.0862	11.2156	11.4285	11.5264	10.8114	10.9882	11.8634	11.6086	11.0631	12.582	12.177	12.4516	12.0719	11.1895	12.2315	Homo sapiens	13	>sp|A3KMH1|VWA8_HUMAN von Willebrand factor A domain-containing protein 8 OS=Homo sapiens GN=VWA8 PE=1 SV=2	VWA8	214824.45	A3KMH1	A3KMH1	8	0
11.7931	10.7397	11.102	12.3291	11.9368	11.4272	11.9495	11.2949	12.3212	10.7433	10.6947	9.87361	11.0493	11.1394	12.0775	11.7227	11.7501	11.5986	Homo sapiens	14	>sp|A4D1E9|GTPBA_HUMAN GTP-binding protein 10 OS=Homo sapiens GN=GTPBP10 PE=1 SV=1	GTPBP10	42932.88	A4D1E9	A4D1E9	2	0
12.7289	13.0453	11.9491	12.9402	12.8669	12.8053	12.032	12.8765	12.577	12.4265	12.5939	12.0204	12.4247	12.4191	12.3515	12.5192	12.4292	13.0344	Homo sapiens	15	>sp|A5D8V7|CC151_HUMAN Coiled-coil domain-containing protein 151 OS=Homo sapiens GN=CCDC151 PE=1 SV=1	CCDC151	69139.51	A5D8V7	A5D8V7	1	0
10.9639	10.6916	12.0611	11.83	11.0231	9.40344	10.8167	11.3314	8.01693	11.9853	11.9856	11.4305	11.4406	11.5273	12.3692	11.3667	9.18549	9.94582	Homo sapiens	16	>sp|A5PLN9|TPC13_HUMAN Trafficking protein particle complex subunit 13 OS=Homo sapiens GN=TRAPPC13 PE=1 SV=2	TRAPPC13	46523.53	A5PLN9	A5PLN9	1	0.000674992
13.1195	13.0863	12.654	13.1375	13.2969	12.7097	12.2632	12.5233	13.5001	11.8244	11.4534	9.2445	11.6482	12.2809	12.9328	11.3957	11.7889	13.0184	Homo sapiens	17	>sp|A5YKK6|CNOT1_HUMAN CCR4-NOT transcription complex subunit 1 OS=Homo sapiens GN=CNOT1 PE=1 SV=2	CNOT1	266938.87	A5YKK6	A5YKK6	16	0
12.6338	12.7874	12.8521	13.1464	12.9887	13.4069	12.8958	12.9332	12.8775	13.2823	13.5501	13.3328	14.0121	13.7995	13.1865	13.0039	13.0183	13.8137	Homo sapiens	18	>sp|A6NCE7|MP3B2_HUMAN Microtubule-associated proteins 1A/1B light chain 3 beta 2 OS=Homo sapiens GN=MAP1LC3B2 PE=2 SV=1;>sp|Q9GZQ8|MLP3B_HUMAN Microtubule-associated proteins 1A/1B light chain 3B OS=Homo sapiens GN=MAP1LC3B PE=1 SV=3;>sp|Q9H492|MLP3A_HUMAN Microtubule-associated proteins 1A/1B light chain 3A OS=Homo sapiens GN=MAP1LC3A PE=1 SV=2	MAP1LC3B2;MAP1LC3B;MAP1LC3A	14627.99;14688.02;14272.45	A6NCE7;Q9GZQ8;Q9H492	A6NCE7;Q9GZQ8;Q9H492	2	0
15.3269	15.4879	15.6387	15.3677	15.8245	15.8395	15.4968	15.4985	15.7364	15.202	15.3817	15.3366	15.2327	15.5562	15.4336	15.0126	15.2788	15.0618	Homo sapiens	19	>sp|A6NDG6|PGP_HUMAN Phosphoglycolate phosphatase OS=Homo sapiens GN=PGP PE=1 SV=1	PGP	34006.06	A6NDG6	A6NDG6	7	0
16.4109	16.6041	16.9414	16.6391	17.2122	17.0504	17.0289	17.2153	16.8236	17.1708	17.4966	17.1034	17.1722	17.1434	17.1997	17.0294	17.4671	17.4367	Homo sapiens	20	>sp|A6NGU5|GGT3_HUMAN Putative gamma-glutamyltranspeptidase 3 OS=Homo sapiens GN=GGT3P PE=5 SV=2;>sp|P19440|GGT1_HUMAN Gamma-glutamyltranspeptidase 1 OS=Homo sapiens GN=GGT1 PE=1 SV=2	GGT3P;GGT1	61501.57;61410.22	A6NGU5;P19440	A6NGU5;P19440	12	0
8.56368	7.9688	8.05728	9.53367	6.22384	7.64507	8.46169	7.05034	8.03312	9.27709	7.64887	6.3772	6.3647	5.82905	8.31278	7.33671	6.49353	6.785	Homo sapiens	21	>sp|A6NHL2|TBAL3_HUMAN Tubulin alpha chain-like 3 OS=Homo sapiens GN=TUBAL3 PE=1 SV=2	TUBAL3	49908.73	A6NHL2	A6NHL2	1	0
9.99064	10.0483	9.86558	10.1143	9.25447	9.14972	9.31101	9.16664	9.50349	9.24953	8.82858	7.97421	8.84584	9.29785	11.0486	8.23604	8.23751	7.32484	Homo sapiens	22	>sp|A6NHR9|SMHD1_HUMAN Structural maintenance of chromosomes flexible hinge domain-containing protein 1 OS=Homo sapiens GN=SMCHD1 PE=1 SV=2	SMCHD1	226373.57	A6NHR9	A6NHR9	15	0
8.891	9.16714	6.56036	7.52151	6.60924	8.86525	7.80541	8.25343	9.65991	7.09425	8.23737	5.9533	7.85704	7.46614	8.7224	8.07228	7.88353	8.62961	Homo sapiens	23	>sp|A6NJ78|MET15_HUMAN Probable methyltransferase-like protein 15 OS=Homo sapiens GN=METTL15 PE=1 SV=1	METTL15	46121.02	A6NJ78	A6NJ78	1	0
15.9161	15.7229	15.6635	15.838	15.269	15.3539	15.3595	15.3469	15.21	14.1791	14.105	14.8451	15.1816	15.3766	14.7294	14.8353	14.7442	14.6364	Homo sapiens	24	>sp|A6NKG5|RTL1_HUMAN Retrotransposon-like protein 1 OS=Homo sapiens GN=RTL1 PE=3 SV=3	RTL1	155047.5	A6NKG5	A6NKG5	14	0
11.0284	11.5396	10.2939	12.9627	8.9873	12.0372	9.76095	9.40658	11.3482	11.3424	7.75149	11.2421	12.5387	9.05582	9.78613	11.5627	10.0546	10.1246	Homo sapiens	25	>sp|A8CG34|P121C_HUMAN Nuclear envelope pore membrane protein POM 121C OS=Homo sapiens GN=POM121C PE=1 SV=2;>sp|Q96HA1|P121A_HUMAN Nuclear envelope pore membrane protein POM 121 OS=Homo sapiens GN=POM121 PE=1 SV=2	POM121C;POM121	125058.88;127720.35	A8CG34;Q96HA1	A8CG34;Q96HA1	2	0
8.762	7.22341	7.51394	7.02469	8.27525	7.9542	8.38067	7.4179	7.84606	10.2985	10.4122	8.70884	8.48818	9.32502	9.63212	9.12444	7.95846	9.46244	Homo sapiens	26	>sp|A8MSI8|LYRM9_HUMAN LYR motif-containing protein 9 OS=Homo sapiens GN=LYRM9 PE=3 SV=2;>tr|J3KTA2|J3KTA2_HUMAN Uncharacterized protein OS=Homo sapiens PE=4 SV=1	LYRM9;	9373.85;17690.2	A8MSI8;J3KTA2	A8MSI8;J3KTA2	1	0
16.9744	17.3508	17.4129	17.1541	17.4083	17.5503	16.7518	17.2432	17.1694	17.505	17.8711	17.2885	17.2291	17.7407	17.6274	17.5566	17.8881	17.9794	Homo sapiens	27	>sp|A8MWD9|RUXGL_HUMAN Putative small nuclear ribonucleoprotein G-like protein 15 OS=Homo sapiens GN=SNRPGP15 PE=5 SV=2;>sp|P62308|RUXG_HUMAN Small nuclear ribonucleoprotein G OS=Homo sapiens GN=SNRPG PE=1 SV=1	SNRPGP15;SNRPG	8544.04;8496.06	A8MWD9;P62308	A8MWD9;P62308	4	0
9.92213	7.92013	7.13179	8.57855	8.70617	9.39649	8.40787	8.38748	7.0407	9.55321	8.27664	9.00364	9.88924	9.06799	7.79438	8.43427	5.7393	8.68231	Homo sapiens	28	>sp|B0I1T2|MYO1G_HUMAN Unconventional myosin-Ig OS=Homo sapiens GN=MYO1G PE=1 SV=2	MYO1G	116442.07	B0I1T2	B0I1T2	1	0.003177629
4.82102	6.90131	6.98964	7.63958	9.12502	8.86774	7.6735	8.19197	7.41506	10.6263	10.347	10.6239	10.1531	9.67914	9.42305	7.62902	8.23912	8.28993	Homo sapiens	29	>tr|B4DLN1|B4DLN1_HUMAN Uncharacterized protein OS=Homo sapiens PE=2 SV=1		48099.32	B4DLN1	B4DLN1	2	0
14.4662	14.5035	14.5759	14.3177	14.6088	14.6975	14.4255	14.6929	14.6901	13.9012	13.9434	14.2167	14.5934	14.7552	14.4276	14.173	14.0743	14.0759	Homo sapiens	30	>tr|C9JMV9|C9JMV9_HUMAN Protein ABHD14A-ACY1 OS=Homo sapiens GN=ABHD14A-ACY1 PE=4 SV=1;>sp|Q03154|ACY1_HUMAN Aminoacylase-1 OS=Homo sapiens GN=ACY1 PE=1 SV=1	ABHD14A-ACY1;ACY1	56435.6;45885.02	C9JMV9;Q03154	C9JMV9;Q03154	10	0
13.699	13.7382	13.7553	13.7737	13.8277	13.7571	13.7078	13.7017	13.587	13.4123	13.6044	13.2705	13.5194	13.5384	13.8442	13.6388	13.4284	13.4563	Homo sapiens	31	>tr|E7EVH7|E7EVH7_HUMAN Uncharacterized protein OS=Homo sapiens PE=4 SV=1;>sp|Q07866|KLC1_HUMAN Kinesin light chain 1 OS=Homo sapiens GN=KLC1 PE=1 SV=2	;KLC1	83694.82;65309.51	E7EVH7;Q07866	E7EVH7;Q07866	12	0
16.8998	16.8692	17.0036	17.0211	17.2069	17.3802	17.3901	17.3854	17.2969	17.2092	17.2089	17.5054	17.3505	17.1742	17.3389	17.938	18.2851	17.7388	Homo sapiens	32	>sp|E9PAV3|NACAM_HUMAN Nascent polypeptide-associated complex subunit alpha, muscle-specific form OS=Homo sapiens GN=NACA PE=1 SV=1	NACA	205421.52	E9PAV3	E9PAV3	7	0
14.2193	13.9146	14.7525	14.6316	14.4098	14.635	14.3585	13.9844	14.0388	14.7494	14.9222	14.5202	15.0959	14.685	15.2573	14.8596	15.075	14.916	Homo sapiens	33	>tr|E9PL57|E9PL57_HUMAN Protein NEDD8-MDP1 (Fragment) OS=Homo sapiens GN=NEDD8-MDP1 PE=4 SV=1	NEDD8-MDP1	19536.42	E9PL57	E9PL57	5	0
13.8693	12.8197	11.6698	14.9818	14.8008	13.8295	14.0986	13.4054	14.357	10.4835	11.0445	15.3127	11.5428	10.8799	10.1841	11.5359	11.1504	7.82159	Homo sapiens	34	>tr|E9PLD3|E9PLD3_HUMAN Uncharacterized protein OS=Homo sapiens PE=4 SV=1;>sp|E9PRG8|CK098_HUMAN Uncharacterized protein C11orf98 OS=Homo sapiens GN=C11orf98 PE=4 SV=1	;C11orf98	11599.92;13798.05	E9PLD3;E9PRG8	E9PLD3;E9PRG8	2	0
11.8387	10.6997	11.8869	10.9847	10.4268	10.7542	11.4387	11.9532	9.88743	12.1915	12.6566	12.7018	12.7159	11.041	12.5443	13.0071	12.5631	11.8416	Homo sapiens	35	>tr|E9PSI1|E9PSI1_HUMAN Uncharacterized protein OS=Homo sapiens PE=4 SV=1;>sp|Q9BY43|CHM4A_HUMAN Charged multivesicular body protein 4a OS=Homo sapiens GN=CHMP4A PE=1 SV=3	;CHMP4A	92387.21;25098.26	E9PSI1;Q9BY43	E9PSI1;Q9BY43	1	0.000342818
7.61348	6.38673	7.14997	5.63767	8.51089	9.19118	10.151	7.0326	7.85446	7.87327	7.8661	7.59797	9.13061	8.57714	8.4598	8.10009	7.36704	8.39936	Homo sapiens	43	>tr|F8W036|F8W036_HUMAN Uncharacterized protein OS=Homo sapiens PE=4 SV=1;>sp|P78537|BL1S1_HUMAN Biogenesis of lysosome-related organelles complex 1 subunit 1 OS=Homo sapiens GN=BLOC1S1 PE=1 SV=2	;BLOC1S1	13827.81;17262.59	F8W036;P78537	F8W036;P78537	1	0
12.2527	11.8404	11.9823	12.1646	11.5744	12.172	11.5317	11.5274	7.42455	12.1494	11.5854	12.8674	12.5058	12.827	11.6747	11.8597	12.125	11.984	Homo sapiens	44	>tr|G3V325|G3V325_HUMAN Protein ATP5J2-PTCD1 OS=Homo sapiens GN=ATP5J2-PTCD1 PE=4 SV=1	ATP5J2-PTCD1	84109.92	G3V325	G3V325	2	0
11.003	10.0502	11.03	11.2752	11.7837	12.5319	11.1916	11.0285	11.7914	12.6441	12.6835	12.4225	13.3622	12.468	14.0186	12.1723	12.5539	11.5008	Homo sapiens	45	>tr|G3V3Y1|G3V3Y1_HUMAN Uncharacterized protein OS=Homo sapiens PE=4 SV=1;>sp|Q8N8N7|PTGR2_HUMAN Prostaglandin reductase 2 OS=Homo sapiens GN=PTGR2 PE=1 SV=1	;PTGR2	31743.26;38498.94	G3V3Y1;Q8N8N7	G3V3Y1;Q8N8N7	2	0
12.8555	12.3075	11.9132	13.3459	14.0435	12.9725	14.7344	13.8417	13.772	13.13	13.5304	13.5977	14.4271	11.8067	13.8784	14.7561	14.6495	13.6738	Homo sapiens	46	>tr|H0YC42|H0YC42_HUMAN Uncharacterized protein OS=Homo sapiens PE=4 SV=2;>sp|P55327|TPD52_HUMAN Tumor protein D52 OS=Homo sapiens GN=TPD52 PE=1 SV=2	;TPD52	31170.14;24327.02	H0YC42;P55327	H0YC42;P55327	4	0
12.7766	12.6494	12.8378	15.6562	12.9655	12.9873	12.6869	13.5198	14.0089	13.4845	13.8192	13.1918	13.9999	13.7341	13.571	13.6289	13.6164	14.3788	Homo sapiens	47	>tr|H3BML4|H3BML4_HUMAN Uncharacterized protein (Fragment) OS=Homo sapiens PE=4 SV=1;>sp|O00241|SIRB1_HUMAN Signal-regulatory protein beta-1 OS=Homo sapiens GN=SIRPB1 PE=1 SV=5;>sp|P78324|SHPS1_HUMAN Tyrosine-protein phosphatase non-receptor type substrate 1 OS=Homo sapiens GN=SIRPA PE=1 SV=2	;SIRPB1;SIRPA	19002.76;43211.11;54966.85	H3BML4;O00241;P78324	H3BML4;O00241;P78324	3	0.001002674
14.2491	13.9214	14.3135	14.7948	14.5345	14.35	14.2653	14.0827	14.0685	14.5593	15.2483	14.97	15.6769	15.7541	15.6808	15.2631	15.1709	15.1856	Homo sapiens	48	>tr|H3BN98|H3BN98_HUMAN Uncharacterized protein (Fragment) OS=Homo sapiens PE=4 SV=2		27168.23	H3BN98	H3BN98	2	0
9.93954	11.2604	11.1167	12.1984	12.2187	12.6525	11.7935	12.4722	11.872	9.22902	11.3173	10.4625	12.4723	12.3279	12.3773	11.9381	12.311	11.958	Homo sapiens	49	>tr|H3BVE0|H3BVE0_HUMAN Uncharacterized protein (Fragment) OS=Homo sapiens PE=4 SV=1;>sp|Q9H3K6|BOLA2_HUMAN BolA-like protein 2 OS=Homo sapiens GN=BOLA2 PE=1 SV=1	;BOLA2	NaN;10116.54	H3BVE0;Q9H3K6	H3BVE0;Q9H3K6	2	0
13.4657	13.7978	13.7475	13.6364	13.7174	13.7232	13.4542	13.8156	13.6905	13.5339	13.6809	13.8816	13.8593	14.2264	13.9089	14.0042	14.1668	13.9453	Homo sapiens	50	>tr|H7C0S8|H7C0S8_HUMAN Uncharacterized protein (Fragment) OS=Homo sapiens PE=4 SV=2		34546.53	H7C0S8	H7C0S8	6	0
15.525	15.6953	15.6757	15.6717	16.0908	15.8426	16.2248	15.9595	15.9344	15.9708	16.5685	15.707	16.4275	16.0876	16.4468	16.4405	16.4853	16.8363	Homo sapiens	51	>tr|I3L0A0|I3L0A0_HUMAN HCG2044781 OS=Homo sapiens GN=TMEM189-UBE2V1 PE=4 SV=1;>sp|Q13404|UB2V1_HUMAN Ubiquitin-conjugating enzyme E2 variant 1 OS=Homo sapiens GN=UBE2V1 PE=1 SV=2	TMEM189-UBE2V1;UBE2V1	42208.65;16494.95	I3L0A0;Q13404	I3L0A0;Q13404	6	0
12.3417	12.0566	12.1673	12.7096	13.0504	12.7526	14.4018	12.7643	13.3674	9.29578	9.84005	9.52364	11.3042	10.7919	11.126	10.5031	9.95983	10.1978	Homo sapiens	52	>tr|I3L0E3|I3L0E3_HUMAN HCG1984214, isoform CRA_a OS=Homo sapiens GN=hCG_1984214 PE=3 SV=1;>sp|Q9Y2R5|RT17_HUMAN 28S ribosomal protein S17, mitochondrial OS=Homo sapiens GN=MRPS17 PE=1 SV=1	hCG_1984214;MRPS17	25720.47;14502.06	I3L0E3;Q9Y2R5	I3L0E3;Q9Y2R5	1	0
11.1178	8.8439	10.2725	11.0521	10.2305	10.8208	11.022	9.507	10.8686	10.3549	10.4697	10.1585	11.2492	11.2374	11.5907	11.0209	10.1416	10.4877	Homo sapiens	53	>tr|J3QR89|J3QR89_HUMAN Uncharacterized protein (Fragment) OS=Homo sapiens PE=4 SV=1;>sp|Q96A33|CCD47_HUMAN Coiled-coil domain-containing protein 47 OS=Homo sapiens GN=CCDC47 PE=1 SV=1	;CCDC47	NaN;55873.83	J3QR89;Q96A33	J3QR89;Q96A33	1	0
15.3817	15.737	15.8308	15.268	15.9099	16.1332	16.0522	15.9731	16.2654	15.8636	15.8972	15.9188	15.9205	16.2698	15.9136	15.3778	16.5818	16.1229	Homo sapiens	54	>tr|L7N2F9|L7N2F9_HUMAN Uncharacterized protein (Fragment) OS=Homo sapiens PE=4 SV=1;>sp|P23763|VAMP1_HUMAN Vesicle-associated membrane protein 1 OS=Homo sapiens GN=VAMP1 PE=1 SV=1;>sp|P63027|VAMP2_HUMAN Vesicle-associated membrane protein 2 OS=Homo sapiens GN=VAMP2 PE=1 SV=3;>sp|Q15836|VAMP3_HUMAN Vesicle-associated membrane protein 3 OS=Homo sapiens GN=VAMP3 PE=1 SV=3	;VAMP1;VAMP2;VAMP3	13068.11;12901.91;12662.73;11309.09	L7N2F9;P23763;P63027;Q15836	L7N2F9;P23763;P63027;Q15836	1	0.00224
16.0152	16.3899	16.5524	15.8764	15.6892	16.2886	15.5392	16.0051	15.8636	15.3974	15.6897	15.3645	15.2121	15.0996	15.4192	14.9708	15.0588	14.9305	Homo sapiens	55	>tr|M0QYT0|M0QYT0_HUMAN Uncharacterized protein (Fragment) OS=Homo sapiens PE=1 SV=1		NaN	M0QYT0	M0QYT0	8	0
7.74973	6.51479	8.43971	8.46587	8.33367	6.94574	8.85725	9.10766	9.2248	6.90208	9.80351	7.95505	7.86142	8.62359	8.7964	7.13679	6.79451	7.14314	Homo sapiens	56	>tr|M0QYV0|M0QYV0_HUMAN Uncharacterized protein (Fragment) OS=Homo sapiens PE=3 SV=1;>sp|P49840|GSK3A_HUMAN Glycogen synthase kinase-3 alpha OS=Homo sapiens GN=GSK3A PE=1 SV=2;>sp|P49841|GSK3B_HUMAN Glycogen synthase kinase-3 beta OS=Homo sapiens GN=GSK3B PE=1 SV=2	;GSK3A;GSK3B	19274.43;50980.81;46744.34	M0QYV0;P49840;P49841	M0QYV0;P49840;P49841	1	0.000342818
7.72271	9.62877	10.4982	9.26345	7.41491	9.65821	9.99028	7.5833	8.75673	10.8164	11.1917	11.1913	12.4246	9.44885	9.95904	8.53503	9.02067	9.56827	Homo sapiens	57	>tr|M0QZK8|M0QZK8_HUMAN Uncharacterized protein OS=Homo sapiens PE=4 SV=1;>sp|O75223|GGCT_HUMAN Gamma-glutamylcyclotransferase OS=Homo sapiens GN=GGCT PE=1 SV=1	;GGCT	11578.18;21007.72	M0QZK8;O75223	M0QZK8;O75223	1	0.001318392
16.5995	16.3106	16.1055	16.7081	16.4149	16.288	16.5902	16.2215	16.4953	15.3819	15.1736	15.111	15.2174	14.8301	15.0004	14.883	14.901	15.0821	Homo sapiens	58	>sp|O00116|ADAS_HUMAN Alkyldihydroxyacetonephosphate synthase, peroxisomal OS=Homo sapiens GN=AGPS PE=1 SV=1	AGPS	72911.81	O00116	O00116	11	0
13.1919	12.081	10.7141	10.2483	9.90473	9.78491	10.4281	7.58268	9.31253	11.3507	10.4585	9.95258	10.8554	10.0291	9.25971	7.97618	8.77773	10.5115	Homo sapiens	59	>sp|O00139|KIF2A_HUMAN Kinesin-like protein KIF2A OS=Homo sapiens GN=KIF2A PE=1 SV=3	KIF2A	79954.54	O00139	O00139	3	0.000342818
15.0008	15.4204	15.3884	14.9313	15.0584	15.1994	14.8978	15.1651	15.0614	15.3888	15.5601	15.308	15.1072	15.2794	15.2407	15.0548	14.9629	15.1278	Homo sapiens	60	>sp|O00148|DX39A_HUMAN ATP-dependent RNA helicase DDX39A OS=Homo sapiens GN=DDX39A PE=1 SV=2	DDX39A	49129.51	O00148	O00148	21	0
12.612	11.9166	12.3751	12.5029	13.1344	12.8489	13.2599	12.7592	12.609	12.0347	11.7965	12.8851	12.4367	12.7796	12.7624	13.5704	14.0411	12.6821	Homo sapiens	61	>sp|O00151|PDLI1_HUMAN PDZ and LIM domain protein 1 OS=Homo sapiens GN=PDLIM1 PE=1 SV=4	PDLIM1	36071.71	O00151	O00151	7	0
12.6786	12.7515	12.9737	12.7918	13.2723	13.1968	13.3525	13.2458	12.8576	13.4267	13.7268	13.6212	14.1155	13.4289	13.6056	13.9995	14.1164	14.18	Homo sapiens	62	>sp|O00154|BACH_HUMAN Cytosolic acyl coenzyme A thioester hydrolase OS=Homo sapiens GN=ACOT7 PE=1 SV=3	ACOT7	41796.02	O00154	O00154	8	0
13.0823	13.1918	12.6647	13.1904	12.6833	12.4453	12.5363	12.9258	13.4327	11.9065	11.6675	11.379	11.2587	11.9566	12.0402	11.1516	10.8888	10.9957	Homo sapiens	63	>sp|O00159|MYO1C_HUMAN Unconventional myosin-Ic OS=Homo sapiens GN=MYO1C PE=1 SV=4	MYO1C	121681.67	O00159	O00159	18	0
13.4714	13.1631	14.1658	13.7908	13.9737	13.9901	13.6913	13.896	13.8488	14.1785	14.5913	14.4264	14.8528	14.8275	14.8321	14.4979	14.4939	14.4625	Homo sapiens	64	>sp|O00170|AIP_HUMAN AH receptor-interacting protein OS=Homo sapiens GN=AIP PE=1 SV=2	AIP	37636.01	O00170	O00170	5	0
10.6026	10.2606	10.7094	10.9682	10.5226	10.8074	10.6627	10.9296	10.5962	10.2519	10.326	10.928	10.5869	10.6629	10.6098	10.6014	10.8293	10.0915	Homo sapiens	65	>sp|O00178|GTPB1_HUMAN GTP-binding protein 1 OS=Homo sapiens GN=GTPBP1 PE=1 SV=3	GTPBP1	72453.81	O00178	O00178	9	0
15.3321	15.843	15.2047	15.4724	16.5352	15.5614	15.9527	16.3618	16.6521	14.2601	14.7106	14.9141	10.7002	14.7012	15.2371	17.912	18.6649	15.3233	Homo sapiens	66	>sp|O00193|SMAP_HUMAN Small acidic protein OS=Homo sapiens GN=SMAP PE=1 SV=1	SMAP	20332.52	O00193	O00193	1	0
12.3956	12.532	11.9277	12.4237	12.5125	11.6238	11.3931	11.9506	12.7882	10.3736	10.0002	10.4075	10.2407	10.6894	10.9232	10.5351	10.243	9.71035	Homo sapiens	67	>sp|O00203|AP3B1_HUMAN AP-3 complex subunit beta-1 OS=Homo sapiens GN=AP3B1 PE=1 SV=3	AP3B1	121320.17	O00203	O00203	12	0
11.2811	10.3346	11.7821	9.74536	9.25185	9.13128	9.00275	7.86261	8.76101	9.45073	8.68919	9.89379	9.74835	10.1642	8.51626	9.7373	8.89638	9.93303	Homo sapiens	68	>sp|O00217|NDUS8_HUMAN NADH dehydrogenase [ubiquinone] iron-sulfur protein 8, mitochondrial OS=Homo sapiens GN=NDUFS8 PE=1 SV=1	NDUFS8	23705.09	O00217	O00217	1	0.006624606
15.8166	15.8121	15.8924	15.7868	15.967	15.8479	16.0362	15.8995	15.974	16.3027	16.4761	16.0818	16.4066	16.3517	16.4868	16.3659	16.4677	16.6168	Homo sapiens	69	>sp|O00231|PSD11_HUMAN 26S proteasome non-ATPase regulatory subunit 11 OS=Homo sapiens GN=PSMD11 PE=1 SV=3	PSMD11	47463.77	O00231	O00231	24	0
15.9424	15.9182	15.9205	15.7058	15.9298	15.7706	15.5402	15.8092	15.919	15.7437	15.2627	15.2469	15.2312	15.5615	15.4968	15.3444	15.2479	15.4519	Homo sapiens	70	>sp|O00232|PSD12_HUMAN 26S proteasome non-ATPase regulatory subunit 12 OS=Homo sapiens GN=PSMD12 PE=1 SV=3	PSMD12	52904.4	O00232	O00232	19	0
9.87462	11.2685	10.3717	11.5668	11.4861	10.8786	11.0096	11.3184	11.6471	10.8741	10.9512	11.6301	12.24	11.6625	11.538	12.1506	11.4977	11.52	Homo sapiens	71	>sp|O00233|PSMD9_HUMAN 26S proteasome non-ATPase regulatory subunit 9 OS=Homo sapiens GN=PSMD9 PE=1 SV=3	PSMD9	24681.81	O00233	O00233	3	0
10.9664	11.8515	8.79077	12.6544	13.1718	12.4792	11.9326	12.6406	12.0898	12.8722	13.6392	12.692	13.8043	13.1368	14.1538	13.1384	13.1519	13.0257	Homo sapiens	72	>sp|O00244|ATOX1_HUMAN Copper transport protein ATOX1 OS=Homo sapiens GN=ATOX1 PE=1 SV=1	ATOX1	7401.62	O00244	O00244	2	0
11.3269	10.7671	11.018	11.1485	11.8267	11.882	9.85029	10.3171	11.5552	12.2138	10.4895	10.5317	10.8192	11.1867	11.7407	11.7984	11.6723	11.8175	Homo sapiens	73	>sp|O00264|PGRC1_HUMAN Membrane-associated progesterone receptor component 1 OS=Homo sapiens GN=PGRMC1 PE=1 SV=3	PGRMC1	21671.15	O00264	O00264	2	0
13.5532	13.6607	13.5605	13.6005	14.255	13.3729	13.931	13.7769	14.1844	13.0477	13.0081	12.8331	12.8853	13.3034	13.0665	13.2437	13.446	13.5675	Homo sapiens	74	>sp|O00267|SPT5H_HUMAN Transcription elongation factor SPT5 OS=Homo sapiens GN=SUPT5H PE=1 SV=1	SUPT5H	120999.57	O00267	O00267	6	0
9.12859	8.35928	9.50829	10.5309	6.7013	7.90742	9.64584	9.40098	7.76673	10.4108	10.0829	10.9981	11.8414	10.6864	11.2351	11.1873	11.3946	10.5685	Homo sapiens	75	>sp|O00273|DFFA_HUMAN DNA fragmentation factor subunit alpha OS=Homo sapiens GN=DFFA PE=1 SV=1	DFFA	36521.9	O00273	O00273	3	0
11.075	10.2457	10.0168	11.0826	10.4304	10.3103	11.0707	10.307	10.7105	10.6622	10.0077	10.5423	10.9745	10.5263	10.6401	10.4817	10.408	10.3478	Homo sapiens	76	>sp|O00291|HIP1_HUMAN Huntingtin-interacting protein 1 OS=Homo sapiens GN=HIP1 PE=1 SV=5	HIP1	116221.14	O00291	O00291	7	0
17.5407	17.5587	17.4824	17.5568	17.4998	17.508	17.5194	17.5496	17.6954	17.6922	17.4409	17.5162	17.458	17.5599	17.5331	17.4619	17.5231	17.5187	Homo sapiens	77	>sp|O00299|CLIC1_HUMAN Chloride intracellular channel protein 1 OS=Homo sapiens GN=CLIC1 PE=1 SV=4	CLIC1	26922.72	O00299	O00299	13	0
16.9128	17.0181	17.1201	16.8596	17.0262	17.0263	16.6268	16.9424	17.0152	17.1474	17.0894	16.955	16.5787	17.2447	17.1915	16.9229	17.0653	16.8778	Homo sapiens	78	>sp|O00303|EIF3F_HUMAN Eukaryotic translation initiation factor 3 subunit F OS=Homo sapiens GN=EIF3F PE=1 SV=1	EIF3F	37563.85	O00303	O00303	11	0
16.427	16.1913	14.5827	17.1293	17.0893	15.8781	16.7909	16.7298	16.0592	16.3284	15.589	15.0634	16.0837	15.2523	16.3577	16.6185	15.8657	16.4477	Homo sapiens	79	>sp|O00330|ODPX_HUMAN Pyruvate dehydrogenase protein X component, mitochondrial OS=Homo sapiens GN=PDHX PE=1 SV=3	PDHX	54122.33	O00330	O00330	2	0
7.72588	7.76675	9.1946	9.24004	9.03716	9.33803	9.60653	8.92534	7.56959	9.97998	9.56847	8.90434	11.1299	9.23389	10.8761	11.013	8.90918	10.1368	Homo sapiens	80	>sp|O00399|DCTN6_HUMAN Dynactin subunit 6 OS=Homo sapiens GN=DCTN6 PE=1 SV=1	DCTN6	20747.02	O00399	O00399	1	0
4.68268	5.83247	9.97903	10.424	8.57699	5.1426	10.5771	8.17615	9.58697	8.46832	9.89982	10.4474	9.68273	10.8575	10.361	11.7007	11.607	10.2996	Homo sapiens	81	>sp|O00401|WASL_HUMAN Neural Wiskott-Aldrich syndrome protein OS=Homo sapiens GN=WASL PE=1 SV=2	WASL	54826.96	O00401	O00401	3	0
16.2968	16.2566	16.127	16.2076	16.2822	16.1699	16.1161	16.135	16.1659	16.1957	15.8307	15.9166	15.9102	16.166	16.1131	15.97	15.8603	15.9367	Homo sapiens	82	>sp|O00410|IPO5_HUMAN Importin-5 OS=Homo sapiens GN=IPO5 PE=1 SV=4	IPO5	123629.93	O00410	O00410	35	0
8.32878	8.21724	8.50158	8.29799	9.67254	6.55509	9.76935	8.49427	8.68504	8.49512	7.86557	8.1683	6.36806	9.65192	8.09194	9.52798	9.53755	9.46286	Homo sapiens	83	>sp|O00418|EF2K_HUMAN Eukaryotic elongation factor 2 kinase OS=Homo sapiens GN=EEF2K PE=1 SV=2	EEF2K	82144.11	O00418	O00418	2	0
14.2827	14.8679	15.29	13.9662	14.51	14.4507	14.1597	14.7462	14.6247	13.5942	14.1996	12.9902	13.6157	14.6459	13.7806	12.7574	13.4155	14.3434	Homo sapiens	84	>sp|O00422|SAP18_HUMAN Histone deacetylase complex subunit SAP18 OS=Homo sapiens GN=SAP18 PE=1 SV=1	SAP18	17561.07	O00422	O00422	3	0
16.5793	16.7467	16.4391	16.6876	16.3573	16.328	16.3424	16.2361	16.4649	15.9588	15.769	15.8504	15.9673	16.0427	15.8916	16.0009	16.1346	16.1947	Homo sapiens	85	>sp|O00425|IF2B3_HUMAN Insulin-like growth factor 2 mRNA-binding protein 3 OS=Homo sapiens GN=IGF2BP3 PE=1 SV=2	IGF2BP3	63705.03	O00425	O00425	26	0
15.8846	15.6549	15.648	15.7998	15.7981	15.6278	15.49	15.6964	15.6249	15.2304	14.7751	15.1236	14.9795	15.2533	15.2179	15.1365	15.1734	14.9326	Homo sapiens	86	>sp|O00429|DNM1L_HUMAN Dynamin-1-like protein OS=Homo sapiens GN=DNM1L PE=1 SV=2	DNM1L	81877.15	O00429	O00429	22	0
14.1583	14.4219	13.8372	14.2192	14.2219	13.9508	14.1651	14.4043	14.1985	14.3943	13.6387	13.2436	12.7211	13.5815	13.612	12.5644	13.2895	13.2392	Homo sapiens	87	>sp|O00442|RTCA_HUMAN RNA 3'-terminal phosphate cyclase OS=Homo sapiens GN=RTCA PE=1 SV=1	RTCA	39336.73	O00442	O00442	4	0
10.8509	11.2388	9.64794	11.546	10.1964	10.1549	10.3029	9.77494	10.1099	8.79608	8.81128	9.84757	9.82089	9.66897	9.83675	8.90363	7.8992	7.26569	Homo sapiens	88	>sp|O00443|P3C2A_HUMAN Phosphatidylinositol 4-phosphate 3-kinase C2 domain-containing subunit alpha OS=Homo sapiens GN=PIK3C2A PE=1 SV=2	PIK3C2A	190679.57	O00443	O00443	8	0
12.3128	11.9754	12.1819	12.2581	12.1663	12.1555	12.787	11.8154	12.131	12.2264	12.5212	12.1577	13.3347	12.5353	12.4564	12.0183	11.91	12.6589	Homo sapiens	89	>sp|O00461|GOLI4_HUMAN Golgi integral membrane protein 4 OS=Homo sapiens GN=GOLIM4 PE=1 SV=1	GOLIM4	81880.31	O00461	O00461	16	0
9.50167	10.6789	9.47473	11.2468	11.7967	11.4661	11.2779	10.6939	11.5295	10.747	10.8615	10.9976	10.4961	11.0589	11.7499	11.2869	11.8704	10.4129	Homo sapiens	90	>sp|O00469|PLOD2_HUMAN Procollagen-lysine,2-oxoglutarate 5-dioxygenase 2 OS=Homo sapiens GN=PLOD2 PE=1 SV=2	PLOD2	84685.61	O00469	O00469	2	0.006315125
11.2268	11.4051	10.9978	11.5471	11.7917	10.8479	11.6717	11.0249	11.6282	10.4487	10.4659	11.0023	10.6144	10.5911	11.3988	10.2728	10.1276	8.8591	Homo sapiens	91	>sp|O00471|EXOC5_HUMAN Exocyst complex component 5 OS=Homo sapiens GN=EXOC5 PE=1 SV=1	EXOC5	81852.87	O00471	O00471	5	0
14.451	14.7576	14.9657	14.3937	14.1693	14.6294	13.739	14.5364	14.0852	13.1057	13.3444	13.7526	12.4667	13.4769	12.5726	12.9994	13.6521	13.1975	Homo sapiens	92	>sp|O00483|NDUA4_HUMAN Cytochrome c oxidase subunit NDUFA4 OS=Homo sapiens GN=NDUFA4 PE=1 SV=1	NDUFA4	9369.86	O00483	O00483	1	0
13.3296	13.2039	13.146	13.3233	13.4938	13.314	13.3553	13.3827	13.2738	13.5223	13.4683	13.0765	13.1274	13.5297	13.3629	13.2356	13.3549	13.6797	Homo sapiens	93	>sp|O00487|PSDE_HUMAN 26S proteasome non-ATPase regulatory subunit 14 OS=Homo sapiens GN=PSMD14 PE=1 SV=1	PSMD14	34577.03	O00487	O00487	8	0
14.1051	13.4451	13.5414	14.0206	14.5525	13.9458	14.715	13.8618	14.0968	14.1847	14.5777	14.4183	14.1139	14.7579	14.6841	15.3367	15.0275	14.8968	Homo sapiens	94	>sp|O00499|BIN1_HUMAN Myc box-dependent-interacting protein 1 OS=Homo sapiens GN=BIN1 PE=1 SV=1	BIN1	64699.38	O00499	O00499	8	0
17.7972	18.2268	18.0344	18.2329	18.413	17.8595	18.5287	18.1934	18.2978	17.731	17.9698	17.6485	18.1033	18.135	17.8893	17.6422	17.6197	18.0627	Homo sapiens	95	>sp|O00505|IMA4_HUMAN Importin subunit alpha-4 OS=Homo sapiens GN=KPNA3 PE=1 SV=2	KPNA3	57810.92	O00505	O00505	8	0
12.7935	12.8492	12.3392	12.6923	12.5597	11.9088	12.6502	12.8117	11.7859	11.4624	11.68	10.7353	11.9648	12.4097	10.4156	11.368	11.0028	13.793	Homo sapiens	96	>sp|O00541|PESC_HUMAN Pescadillo homolog OS=Homo sapiens GN=PES1 PE=1 SV=1	PES1	68002.62	O00541	O00541	11	0
12.635	13.0138	12.9909	13.1176	12.045	12.042	12.0033	11.7775	11.9067	11.5605	11.0694	10.5602	11.0227	11.9447	9.55576	7.94391	8.05415	10.6817	Homo sapiens	97	>sp|O00567|NOP56_HUMAN Nucleolar protein 56 OS=Homo sapiens GN=NOP56 PE=1 SV=4	NOP56	66049.89	O00567	O00567	8	0
16.2551	16.4666	16.2966	16.2284	15.8972	15.8979	15.5335	15.7864	16.0629	14.5789	14.7214	14.0423	14.7943	14.9448	14.4279	14.4166	14.1222	15.3189	Homo sapiens	98	>sp|O00571|DDX3X_HUMAN ATP-dependent RNA helicase DDX3X OS=Homo sapiens GN=DDX3X PE=1 SV=3	DDX3X	73243.41	O00571	O00571	29	0
13.1207	14.0423	13.6113	14.4719	15.3677	13.9127	14.7061	14.4971	14.9577	11.8606	8.11073	11.3872	11.1806	11.738	12.4292	14.6452	14.0363	11.9693	Homo sapiens	99	>sp|O00622|CYR61_HUMAN Protein CYR61 OS=Homo sapiens GN=CYR61 PE=1 SV=1	CYR61	42026.59	O00622	O00622	6	0
12.3581	12.0898	12.2278	12.1924	11.3493	11.8155	11.4575	12.0138	12.2908	10.9789	12.1019	11.8149	12.0706	12.9997	12.469	12.4049	12.4052	12.1966	Homo sapiens	100	>sp|O00629|IMA3_HUMAN Importin subunit alpha-3 OS=Homo sapiens GN=KPNA4 PE=1 SV=1	KPNA4	57886.75	O00629	O00629	5	0
13.1857	13.4158	13.1656	13.3654	14.0036	13.8137	13.6172	13.5066	14.0913	13.9053	14.1087	13.887	14.08	14.1805	14.1207	13.4056	13.7671	13.7159	Homo sapiens	101	>sp|O00743|PPP6_HUMAN Serine/threonine-protein phosphatase 6 catalytic subunit OS=Homo sapiens GN=PPP6C PE=1 SV=1	PPP6C	35144.26	O00743	O00743	5	0
11.1383	12.5289	11.338	13.8774	13.6612	13.6016	14.1594	13.3563	14.5208	10.2989	9.79013	10.1582	14.9011	14.8788	14.374	13.6505	13.7445	14.0998	Homo sapiens	102	>sp|O00767|ACOD_HUMAN Acyl-CoA desaturase OS=Homo sapiens GN=SCD PE=1 SV=2	SCD	41522.67	O00767	O00767	3	0
11.1257	10.8321	10.0442	12.4262	13.4163	10.8973	12.6601	12.9308	11.6117	11.1905	11.7754	10.7319	12.3462	12.64	12.6235	13.0956	13.4213	13.8792	Homo sapiens	103	>sp|O14493|CLD4_HUMAN Claudin-4 OS=Homo sapiens GN=CLDN4 PE=1 SV=1	CLDN4	22077.26	O14493	O14493	3	0
6.54508	9.46717	5.66175	7.76083	6.50724	7.91154	5.88798	8.46691	6.98606	8.21872	7.66941	8.15106	7.55154	8.7193	7.49887	6.69254	7.95208	7.75186	Homo sapiens	104	>sp|O14497|ARI1A_HUMAN AT-rich interactive domain-containing protein 1A OS=Homo sapiens GN=ARID1A PE=1 SV=3	ARID1A	242044.61	O14497	O14497	1	0.000342818
13.5267	14.033	13.5065	13.5988	13.8893	14.2671	14.0991	13.8565	14.5244	13.3834	14.3738	13.5437	14.222	14.1227	14.267	14.0195	14.4631	14.4814	Homo sapiens	105	>sp|O14531|DPYL4_HUMAN Dihydropyrimidinase-related protein 4 OS=Homo sapiens GN=DPYSL4 PE=1 SV=2	DPYSL4	61877.61	O14531	O14531	3	0
11.8927	11.2335	11.378	11.6208	11.5334	11.7732	11.7563	12.0617	11.3164	11.8464	11.5137	12.342	13.181	11.344	12.2526	12.9117	12.7533	12.1804	Homo sapiens	106	>sp|O14562|UBFD1_HUMAN Ubiquitin domain-containing protein UBFD1 OS=Homo sapiens GN=UBFD1 PE=1 SV=2	UBFD1	33381.92	O14562	O14562	7	0
10.2427	9.46968	9.58065	9.77401	8.12497	9.60233	6.93649	9.93892	9.46713	8.68442	7.91298	8.12271	8.8205	8.48716	10.4796	9.64309	7.41723	6.88035	Homo sapiens	107	>sp|O14579|COPE_HUMAN Coatomer subunit epsilon OS=Homo sapiens GN=COPE PE=1 SV=3	COPE	34482.02	O14579	O14579	3	0
15.6086	15.6357	15.4146	15.7875	15.8563	15.6938	15.445	15.3919	15.7543	15.6257	15.9678	15.9819	16.1149	15.9935	15.7976	16.1593	16.24	16.2711	Homo sapiens	108	>sp|O14602|IF1AY_HUMAN Eukaryotic translation initiation factor 1A, Y-chromosomal OS=Homo sapiens GN=EIF1AY PE=1 SV=4;>sp|P47813|IF1AX_HUMAN Eukaryotic translation initiation factor 1A, X-chromosomal OS=Homo sapiens GN=EIF1AX PE=1 SV=2	EIF1AY;EIF1AX	16442.36;16460.4	O14602;P47813	O14602;P47813	5	0
11.7764	11.7115	11.0358	11.6839	11.4936	11.118	11.101	11.3701	11.4311	11.7943	11.5225	12.0796	11.8131	11.7328	11.4417	11.4179	10.7484	10.9931	Homo sapiens	109	>sp|O14617|AP3D1_HUMAN AP-3 complex subunit delta-1 OS=Homo sapiens GN=AP3D1 PE=1 SV=1	AP3D1	130157.99	O14617	O14617	9	0
9.59027	8.14342	6.48768	11.3346	8.78589	8.57736	10.9331	9.01516	9.99327	8.69171	8.24416	8.03108	8.15699	6.7445	7.52118	8.89834	8.04408	8.83763	Homo sapiens	110	>sp|O14641|DVL2_HUMAN Segment polarity protein dishevelled homolog DVL-2 OS=Homo sapiens GN=DVL2 PE=1 SV=1	DVL2	78947.94	O14641	O14641	3	0
13.2144	13.1413	13.0603	13.6866	13.9003	13.6313	13.7539	13.195	13.5752	13.406	14.3286	13.6213	14.07	13.9279	14.1514	13.9577	13.8997	14.0223	Homo sapiens	111	>sp|O14672|ADA10_HUMAN Disintegrin and metalloproteinase domain-containing protein 10 OS=Homo sapiens GN=ADAM10 PE=1 SV=1	ADAM10	84142.12	O14672	O14672	6	0
9.95666	10.5411	10.9292	12.4433	12.1725	11.0199	11.9368	10.8261	11.3747	12.1588	12.1559	11.2857	10.8271	12.5621	11.4189	9.9451	11.2728	11.7564	Homo sapiens	112	>sp|O14734|ACOT8_HUMAN Acyl-coenzyme A thioesterase 8 OS=Homo sapiens GN=ACOT8 PE=1 SV=1	ACOT8	35914.22	O14734	O14734	2	0
8.21518	8.79003	6.51831	9.56845	8.62568	8.74715	9.62073	7.9785	7.8369	9.75813	9.71003	8.74244	10.5492	10.8494	10.5894	10.0653	8.50495	10.3867	Homo sapiens	113	>sp|O14735|CDIPT_HUMAN CDP-diacylglycerol--inositol 3-phosphatidyltransferase OS=Homo sapiens GN=CDIPT PE=1 SV=1	CDIPT	23538.8	O14735	O14735	2	0
13.7389	13.7684	13.3813	14.0208	14.1168	14.2606	14.5991	13.9078	14.4993	13.0864	13.4085	13.5694	13.596	12.2406	13.5398	14.8871	15.6346	14.3173	Homo sapiens	114	>sp|O14737|PDCD5_HUMAN Programmed cell death protein 5 OS=Homo sapiens GN=PDCD5 PE=1 SV=3	PDCD5	14285.08	O14737	O14737	8	0
15.3473	15.5792	15.3125	15.4475	15.522	15.3238	15.416	15.4101	15.5932	14.7132	14.6389	14.5818	14.5756	14.8949	14.721	14.7948	14.8156	14.9137	Homo sapiens	115	>sp|O14744|ANM5_HUMAN Protein arginine N-methyltransferase 5 OS=Homo sapiens GN=PRMT5 PE=1 SV=4	PRMT5	72683.86	O14744	O14744	13	0
15.0215	15.0989	15.065	15.33	15.9165	15.6483	15.818	15.451	15.7847	15.7838	16.2991	16.4167	17.0388	16.6675	16.5012	16.6927	16.9922	16.8192	Homo sapiens	116	>sp|O14745|NHRF1_HUMAN Na(+)/H(+) exchange regulatory cofactor NHE-RF1 OS=Homo sapiens GN=SLC9A3R1 PE=1 SV=4	SLC9A3R1	38868.43	O14745	O14745	15	0
12.5359	12.4623	11.8517	12.548	12.0799	10.9129	12.2391	11.9712	12.0434	12.8837	13.5742	12.6279	13.2206	12.1101	13.1444	13.0304	12.5211	12.8978	Homo sapiens	117	>sp|O14776|TCRG1_HUMAN Transcription elongation regulator 1 OS=Homo sapiens GN=TCERG1 PE=1 SV=2	TCERG1	123901.03	O14776	O14776	9	0
14.2457	13.9319	13.976	14.5289	14.0751	14.0032	14.0096	13.7851	14.0662	13.4829	12.9957	13.1931	13.4195	13.633	13.0962	13.6724	13.1896	13.9072	Homo sapiens	118	>sp|O14787|TNPO2_HUMAN Transportin-2 OS=Homo sapiens GN=TNPO2 PE=1 SV=3	TNPO2	101388.17	O14787	O14787	8	0
16.784	17.0783	17.1749	16.9725	17.2555	17.3392	17.0629	17.1646	17.3284	17.1455	17.405	17.4483	17.2556	17.0785	17.1868	17.3026	17.4833	17.2001	Homo sapiens	119	>sp|O14818|PSA7_HUMAN Proteasome subunit alpha type-7 OS=Homo sapiens GN=PSMA7 PE=1 SV=1	PSMA7	27886.84	O14818	O14818	17	0
12.3846	12.659	12.7064	12.8713	13.5467	13.0513	13.3866	13.4699	13.3784	13.6956	13.4092	13.5806	12.3602	13.7402	13.5113	13.5617	14.3863	13.4847	Homo sapiens	120	>sp|O14828|SCAM3_HUMAN Secretory carrier-associated membrane protein 3 OS=Homo sapiens GN=SCAMP3 PE=1 SV=3	SCAMP3	38286.96	O14828	O14828	3	0.000674992
8.57785	6.06394	7.10248	7.86304	8.22033	7.65368	9.33433	6.12604	8.92605	6.20637	5.38762	8.03157	8.54317	9.01753	7.78411	7.7649	8.65588	6.97205	Homo sapiens	121	>sp|O14874|BCKD_HUMAN [3-methyl-2-oxobutanoate dehydrogenase [lipoamide]] kinase, mitochondrial OS=Homo sapiens GN=BCKDK PE=1 SV=2	BCKDK	46360.45	O14874	O14874	1	0.001609788
11.0581	10.7448	11.3601	9.50869	9.11531	9.52209	8.2034	8.35001	9.60922	10.6615	10.597	9.39371	10.3675	11.2227	10.3503	9.07281	9.15314	10.7933	Homo sapiens	122	>sp|O14880|MGST3_HUMAN Microsomal glutathione S-transferase 3 OS=Homo sapiens GN=MGST3 PE=1 SV=1	MGST3	16516.3	O14880	O14880	1	0
6.87071	12.2474	11.7451	13.329	13.4045	13.0033	12.7736	13.0184	12.9796	12.4712	12.4496	13.0251	13.5905	13.6818	13.2945	12.9092	13.3386	12.9008	Homo sapiens	123	>sp|O14907|TX1B3_HUMAN Tax1-binding protein 3 OS=Homo sapiens GN=TAX1BP3 PE=1 SV=2	TAX1BP3	13734.7	O14907	O14907	2	0.001609788
12.5856	12.6884	10.5039	13.3683	13.5862	12.0179	13.6516	11.5858	13.5533	10.1922	11.7512	11.7652	9.77478	11.7535	12.4471	14.9656	14.7667	12.3898	Homo sapiens	124	>sp|O14908|GIPC1_HUMAN PDZ domain-containing protein GIPC1 OS=Homo sapiens GN=GIPC1 PE=1 SV=2	GIPC1	36049.22	O14908	O14908	3	0
7.48056	7.69706	8.69194	7.88873	8.94276	8.75023	7.26342	8.0953	4.38736	9.1158	8.92124	8.98857	8.90646	9.01256	8.76767	7.84551	7.30604	7.79756	Homo sapiens	125	>sp|O14929|HAT1_HUMAN Histone acetyltransferase type B catalytic subunit OS=Homo sapiens GN=HAT1 PE=1 SV=1	HAT1	49512.58	O14929	O14929	4	0
7.51099	8.57208	6.79156	9.22012	7.74829	8.50608	7.35108	8.16658	8.75981	9.62887	8.5862	9.73067	7.37041	10.5622	10.2393	9.27459	8.81915	7.15074	Homo sapiens	126	>sp|O14933|UB2L6_HUMAN Ubiquitin/ISG15-conjugating enzyme E2 L6 OS=Homo sapiens GN=UBE2L6 PE=1 SV=4	UBE2L6	17768.7	O14933	O14933	1	0
7.83735	8.36809	8.77378	9.7537	7.64786	9.80481	8.6208	9.02513	7.94902	9.69631	11.5173	10.3611	10.5449	10.1176	10.4486	10.1455	10.5643	10.4833	Homo sapiens	127	>sp|O14936|CSKP_HUMAN Peripheral plasma membrane protein CASK OS=Homo sapiens GN=CASK PE=1 SV=3	CASK	105122.73	O14936	O14936	2	0
12.3242	10.8025	12.1129	11.6271	9.94534	10.9822	8.66952	10.0125	7.27039	10.5112	9.7648	9.10228	11.3145	10.5458	9.13637	9.57855	8.78235	12.0099	Homo sapiens	128	>sp|O14949|QCR8_HUMAN Cytochrome b-c1 complex subunit 8 OS=Homo sapiens GN=UQCRQ PE=1 SV=4	UQCRQ	9906.37	O14949	O14949	1	0
17.1875	17.2504	16.9449	17.165	17.4122	17.178	17.1019	17.2894	17.3003	17.1532	17.1632	17.1489	17.2747	17.2787	17.2794	17.3128	17.1782	17.2522	Homo sapiens	129	>sp|O14950|ML12B_HUMAN Myosin regulatory light chain 12B OS=Homo sapiens GN=MYL12B PE=1 SV=2;>sp|P19105|ML12A_HUMAN Myosin regulatory light chain 12A OS=Homo sapiens GN=MYL12A PE=1 SV=2	MYL12B;MYL12A	19779.15;19794.13	O14950;P19105	O14950;P19105	13	0
14.9744	14.9421	14.5785	14.9813	14.8631	14.16	14.5659	14.5737	15.0795	14.3958	14.4192	14.8504	14.8021	14.4492	14.3741	14.4129	13.9035	13.9669	Homo sapiens	130	>sp|O14964|HGS_HUMAN Hepatocyte growth factor-regulated tyrosine kinase substrate OS=Homo sapiens GN=HGS PE=1 SV=1	HGS	86192.02	O14964	O14964	11	0
9.82477	10.8838	8.63116	9.98506	10.2957	10.0735	9.7627	8.71826	9.70279	6.74238	7.95372	9.59965	9.35701	9.04431	6.53779	9.51799	8.41073	9.37563	Homo sapiens	131	>sp|O14966|RAB7L_HUMAN Ras-related protein Rab-7L1 OS=Homo sapiens GN=RAB29 PE=1 SV=1	RAB29	23155.25	O14966	O14966	1	0
7.7641	9.26097	7.03084	8.23776	8.44986	7.56811	8.78492	8.83008	8.41866	8.85357	8.93308	8.44344	9.45386	8.14715	7.17805	7.199	7.89674	9.6202	Homo sapiens	132	>sp|O14972|DSCR3_HUMAN Down syndrome critical region protein 3 OS=Homo sapiens GN=DSCR3 PE=2 SV=1	DSCR3	33010.41	O14972	O14972	2	0
13.1505	12.7789	12.431	13.3335	13.3159	12.4808	13.2934	12.8444	13.3987	12.9369	12.5781	14.2417	13.6366	13.1985	13.5623	14.0161	13.8371	12.2976	Homo sapiens	133	>sp|O14974|MYPT1_HUMAN Protein phosphatase 1 regulatory subunit 12A OS=Homo sapiens GN=PPP1R12A PE=1 SV=1	PPP1R12A	115280.71	O14974	O14974	23	0
10.3147	10.4658	10.1278	9.96678	11.3186	10.6347	10.3122	11.2889	9.75876	9.36256	8.93048	9.0986	9.85871	9.61109	8.27824	9.65408	8.79049	10.7269	Homo sapiens	134	>sp|O14976|GAK_HUMAN Cyclin-G-associated kinase OS=Homo sapiens GN=GAK PE=1 SV=2	GAK	143190.56	O14976	O14976	5	0
15.8427	16.4746	16.7198	15.6265	15.6404	16.4532	15.1792	15.7716	15.9602	15.9904	15.7555	16.0151	15.2735	15.6289	16.0596	15.7708	15.7732	15.0215	Homo sapiens	135	>sp|O14979|HNRDL_HUMAN Heterogeneous nuclear ribonucleoprotein D-like OS=Homo sapiens GN=HNRNPDL PE=1 SV=3	HNRNPDL	46437.53	O14979	O14979	7	0
15.621	15.5387	15.4802	15.578	15.5078	15.3776	15.5237	15.223	15.3194	15.3896	15.0034	14.764	15.0036	15.3764	15.1449	14.9551	14.7821	15.3462	Homo sapiens	136	>sp|O14980|XPO1_HUMAN Exportin-1 OS=Homo sapiens GN=XPO1 PE=1 SV=1	XPO1	123385.88	O14980	O14980	34	0
7.89605	8.98978	9.04372	8.24795	9.30733	8.77899	7.31178	8.15077	7.71049	8.66678	7.66596	8.02213	7.68137	8.17601	8.53714	8.87216	7.88319	7.91348	Homo sapiens	137	>sp|O14981|BTAF1_HUMAN TATA-binding protein-associated factor 172 OS=Homo sapiens GN=BTAF1 PE=1 SV=2	BTAF1	206887.42	O14981	O14981	1	0
11.1624	11.0979	10.8404	10.9995	10.3798	10.7516	11.1638	10.7738	11.5245	10.2988	9.94656	12.6901	11.7255	10.5772	11.2362	9.52001	10.4975	7.35655	Homo sapiens	138	>sp|O15027|SC16A_HUMAN Protein transport protein Sec16A OS=Homo sapiens GN=SEC16A PE=1 SV=3	SEC16A	233517.18	O15027	O15027	5	0
10.7989	10.7134	11.3245	11.3116	11.4565	11.6409	11.7819	11.4833	10.544	11.6305	11.5929	11.8907	12.774	12.2366	12.1755	11.5834	11.804	11.7445	Homo sapiens	139	>sp|O15031|PLXB2_HUMAN Plexin-B2 OS=Homo sapiens GN=PLXNB2 PE=1 SV=3	PLXNB2	205127.21	O15031	O15031	5	0
14.6317	14.7082	14.54	14.7148	14.4897	14.4528	14.0677	14.185	14.5162	14.6119	14.7232	14.6525	14.5753	14.698	14.5892	14.8099	14.3625	14.6486	Homo sapiens	140	>sp|O15042|SR140_HUMAN U2 snRNP-associated SURP motif-containing protein OS=Homo sapiens GN=U2SURP PE=1 SV=2	U2SURP	118291.89	O15042	O15042	11	0
11.3762	11.7056	12.1229	11.7654	10.6814	12.037	10.0082	11.6531	13.0011	10.262	9.64691	8.42356	9.59159	10.227	9.93743	10.1966	9.14289	11.1725	Homo sapiens	141	>sp|O15066|KIF3B_HUMAN Kinesin-like protein KIF3B OS=Homo sapiens GN=KIF3B PE=1 SV=1	KIF3B	85125.15	O15066	O15066	1	0
14.8222	15.0286	15.1227	14.7811	15.0638	14.9443	14.8259	14.9926	14.9671	14.183	14.3674	14.4642	14.396	14.6583	14.4216	14.5323	14.5459	14.4556	Homo sapiens	142	>sp|O15067|PUR4_HUMAN Phosphoribosylformylglycinamidine synthase OS=Homo sapiens GN=PFAS PE=1 SV=4	PFAS	144734.36	O15067	O15067	16	0
12.6703	12.6575	12.4907	12.7485	12.8894	12.7105	12.4818	12.7944	12.693	12.0073	12.297	12.6808	12.8138	12.263	12.7772	11.6378	12.4002	11.2515	Homo sapiens	143	>sp|O15075|DCLK1_HUMAN Serine/threonine-protein kinase DCLK1 OS=Homo sapiens GN=DCLK1 PE=1 SV=2	DCLK1	82223.99	O15075	O15075	12	0
11.3362	11.4412	10.0972	10.494	11.7265	10.0683	10.7477	7.59522	6.37976	7.40505	10.8162	7.0825	7.65995	10.8209	10.4473	7.346	10.9119	9.95021	Homo sapiens	144	>sp|O15111|IKKA_HUMAN Inhibitor of nuclear factor kappa-B kinase subunit alpha OS=Homo sapiens GN=CHUK PE=1 SV=2	CHUK	84639.58	O15111	O15111	1	0.006624606
10.7312	9.57667	10.0196	11.1046	10.5161	10.6731	10.6384	9.97638	10.8079	12.5038	12.2122	12.3526	12.5719	12.1104	12.4677	11.764	11.9471	11.7345	Homo sapiens	145	>sp|O15118|NPC1_HUMAN Niemann-Pick C1 protein OS=Homo sapiens GN=NPC1 PE=1 SV=2	NPC1	142166.85	O15118	O15118	4	0
9.98265	11.1767	6.20307	7.69734	8.05181	8.21109	7.86447	6.28908	6.64043	9.45327	8.58509	8.07839	7.40866	7.9351	7.43368	7.71314	7.88158	8.97635	Homo sapiens	146	>sp|O15121|DEGS1_HUMAN Sphingolipid delta(4)-desaturase DES1 OS=Homo sapiens GN=DEGS1 PE=1 SV=1	DEGS1	37866.03	O15121	O15121	2	0
11.5046	10.791	10.8181	8.44458	9.40437	5.43841	10.3899	10.2448	10.4702	8.55781	9.39518	7.96917	11.8976	11.0236	9.20765	8.63506	9.60816	12.3819	Homo sapiens	147	>sp|O15126|SCAM1_HUMAN Secretory carrier-associated membrane protein 1 OS=Homo sapiens GN=SCAMP1 PE=1 SV=2	SCAMP1	37920.43	O15126	O15126	2	0.000674992
10.7095	11.3559	11.8904	11.4089	12.9396	12.7109	12.0289	12.1487	11.4244	11.0577	10.769	12.5208	14.0677	14.2788	13.0999	14.1455	14.2671	13.6722	Homo sapiens	148	>sp|O15127|SCAM2_HUMAN Secretory carrier-associated membrane protein 2 OS=Homo sapiens GN=SCAMP2 PE=1 SV=2	SCAMP2	36648.91	O15127	O15127	2	0
16.9625	16.9343	17.0109	17.0487	16.7999	16.7655	16.6087	16.7434	17.1874	15.8434	15.6941	15.4165	15.7529	16.3158	16.2437	15.7598	15.6582	15.8519	Homo sapiens	149	>sp|O15143|ARC1B_HUMAN Actin-related protein 2/3 complex subunit 1B OS=Homo sapiens GN=ARPC1B PE=1 SV=3	ARPC1B	40949.78	O15143	O15143	15	0
14.3358	14.1134	14.1312	14.3178	13.8743	13.9469	13.8484	13.7945	14.1302	13.7683	13.5034	13.733	13.5394	13.8544	13.8757	13.3818	13.2124	13.0211	Homo sapiens	150	>sp|O15144|ARPC2_HUMAN Actin-related protein 2/3 complex subunit 2 OS=Homo sapiens GN=ARPC2 PE=1 SV=1	ARPC2	34333.01	O15144	O15144	20	0
15.1597	15.3756	15.5804	15.2818	15.0682	15.6149	15.3764	15.1912	15.2689	16.2397	16.105	15.9925	15.7594	15.9181	15.8096	15.5863	15.5863	15.7952	Homo sapiens	151	>sp|O15145|ARPC3_HUMAN Actin-related protein 2/3 complex subunit 3 OS=Homo sapiens GN=ARPC3 PE=1 SV=3	ARPC3	20546.67	O15145	O15145	9	0
12.1609	12.4761	10.4397	11.8848	12.2502	11.6516	11.2565	11.8065	11.5721	11.8645	11.683	11.558	12.3446	12.0215	12.1423	11.5156	11.418	11.7233	Homo sapiens	152	>sp|O15160|RPAC1_HUMAN DNA-directed RNA polymerases I and III subunit RPAC1 OS=Homo sapiens GN=POLR1C PE=1 SV=1	POLR1C	39249.7	O15160	O15160	1	0.000674992
12.7991	12.9195	13.006	12.8192	12.9505	13.0799	12.4843	12.9573	12.6974	13.7115	13.9099	13.4484	14.0646	13.6991	13.9092	13.9226	14.226	14.4092	Homo sapiens	153	>sp|O15173|PGRC2_HUMAN Membrane-associated progesterone receptor component 2 OS=Homo sapiens GN=PGRMC2 PE=1 SV=1	PGRMC2	23818.45	O15173	O15173	6	0
10.3206	10.3313	10.6158	10.5951	10.4159	10.0808	8.59814	10.0377	10.6434	11.0846	10.9712	6.89281	10.8915	10.5554	15.4344	9.99756	10.3313	9.58856	Homo sapiens	154	>sp|O15228|GNPAT_HUMAN Dihydroxyacetone phosphate acyltransferase OS=Homo sapiens GN=GNPAT PE=1 SV=1	GNPAT	77187.92	O15228	O15228	4	0
12.5845	12.4705	11.9709	13.0057	11.779	11.7198	11.8202	11.5484	12.1763	9.49127	9.37792	11.1637	10.5528	10.6538	10.3041	9.7027	9.78943	8.31623	Homo sapiens	155	>sp|O15235|RT12_HUMAN 28S ribosomal protein S12, mitochondrial OS=Homo sapiens GN=MRPS12 PE=1 SV=1	MRPS12	15172.87	O15235	O15235	4	0
14.1915	14.2076	14.4954	14.6242	15.9088	14.4447	15.579	14.6866	15.757	12.4517	11.8621	12.6269	13.8004	13.7828	13.6721	16.6268	16.7567	16.3412	Homo sapiens	156	>sp|O15240|VGF_HUMAN Neurosecretory protein VGF OS=Homo sapiens GN=VGF PE=1 SV=2	VGF	67257.87	O15240	O15240	28	0
9.03266	8.19598	8.62367	8.25519	10.1182	9.49374	9.59325	7.39523	10.8489	9.66282	10.0613	8.94725	8.87969	8.27541	9.09352	9.14322	10.5	10.2205	Homo sapiens	157	>sp|O15254|ACOX3_HUMAN Peroxisomal acyl-coenzyme A oxidase 3 OS=Homo sapiens GN=ACOX3 PE=1 SV=2	ACOX3	77629.08	O15254	O15254	1	0
10.0527	8.77632	9.06071	9.58583	8.48901	10.4617	6.71404	8.01055	8.37755	10.3989	8.64913	8.61489	9.03092	8.86618	9.44256	8.9167	7.87839	8.81268	Homo sapiens	158	>sp|O15258|RER1_HUMAN Protein RER1 OS=Homo sapiens GN=RER1 PE=1 SV=1	RER1	22957.96	O15258	O15258	3	0
12.8407	12.7758	12.4198	12.9316	12.8858	12.6976	12.6844	12.975	12.115	12.9511	12.9636	12.8739	12.3366	13.3588	13.234	13.2982	13.0579	12.8751	Homo sapiens	159	>sp|O15260|SURF4_HUMAN Surfeit locus protein 4 OS=Homo sapiens GN=SURF4 PE=1 SV=3	SURF4	30394	O15260	O15260	5	0
14.476	14.6307	14.5171	14.3466	14.4103	14.2859	14.437	14.3708	14.548	13.9258	13.983	13.4538	13.8932	14.3681	14.322	13.7692	13.7893	14.0884	Homo sapiens	160	>sp|O15269|SPTC1_HUMAN Serine palmitoyltransferase 1 OS=Homo sapiens GN=SPTLC1 PE=1 SV=1	SPTLC1	52743.95	O15269	O15269	13	0
13.6216	12.8816	12.6355	13.53	13.1343	12.7023	12.9583	13.1345	12.8552	13.2197	12.2387	12.7676	13.213	13.3772	13.0584	13.1959	12.7554	13.1739	Homo sapiens	161	>sp|O15270|SPTC2_HUMAN Serine palmitoyltransferase 2 OS=Homo sapiens GN=SPTLC2 PE=1 SV=1	SPTLC2	62924.27	O15270	O15270	11	0
13.8308	13.5953	13.744	13.8075	13.3912	13.6984	13.1304	13.4374	13.5784	13.4797	13.4495	12.9429	13.3832	13.6046	13.7393	13.0542	13.1447	13.3757	Homo sapiens	162	>sp|O15294|OGT1_HUMAN UDP-N-acetylglucosamine--peptide N-acetylglucosaminyltransferase 110 kDa subunit OS=Homo sapiens GN=OGT PE=1 SV=3	OGT	116924.6	O15294	O15294	7	0
12.601	11.7484	12.6922	12.7894	12.5902	12.9326	12.5375	12.87	11.8107	12.3699	12.2139	11.4632	12.2479	12.4261	12.8827	11.6815	11.6964	11.9719	Homo sapiens	163	>sp|O15305|PMM2_HUMAN Phosphomannomutase 2 OS=Homo sapiens GN=PMM2 PE=1 SV=1	PMM2	28082.14	O15305	O15305	6	0
15.6214	15.486	14.85	15.6068	15.8008	15.4937	16.1558	15.66	15.9738	16.9449	16.5337	16.7799	16.3335	15.6017	16.6109	17.8343	17.6331	17.0498	Homo sapiens	164	>sp|O15347|HMGB3_HUMAN High mobility group protein B3 OS=Homo sapiens GN=HMGB3 PE=1 SV=4	HMGB3	22979.96	O15347	O15347	5	0
15.0028	14.9051	14.8446	15.0484	15.1412	15.0576	15.3452	15.1408	15.0011	15.318	15.422	15.7898	15.2739	15.0764	15.2385	15.6757	15.7224	15.216	Homo sapiens	165	>sp|O15355|PPM1G_HUMAN Protein phosphatase 1G OS=Homo sapiens GN=PPM1G PE=1 SV=1	PPM1G	59271.62	O15355	O15355	17	0
14.5685	14.2144	14.5387	14.5223	14.4535	14.3045	13.9808	14.3602	14.194	12.9082	12.8087	12.3612	13.1807	12.7624	13.156	13.2016	12.9206	13.3739	Homo sapiens	166	>sp|O15371|EIF3D_HUMAN Eukaryotic translation initiation factor 3 subunit D OS=Homo sapiens GN=EIF3D PE=1 SV=1	EIF3D	63972.77	O15371	O15371	12	0
16.0419	16.162	16.1757	15.8525	16.1292	16.3051	16.378	16.0781	16.1177	16.328	16.6421	16.8054	16.7642	16.4172	16.4614	16.6892	16.8221	16.5646	Homo sapiens	167	>sp|O15372|EIF3H_HUMAN Eukaryotic translation initiation factor 3 subunit H OS=Homo sapiens GN=EIF3H PE=1 SV=1	EIF3H	39930.31	O15372	O15372	16	0
12.3966	12.5158	12.2299	12.5269	13.6581	12.2961	13.0337	13.3823	12.8671	13.2196	13.5846	13.3405	14.0089	13.318	13.7072	13.7114	12.863	13.3051	Homo sapiens	168	>sp|O15382|BCAT2_HUMAN Branched-chain-amino-acid aminotransferase, mitochondrial OS=Homo sapiens GN=BCAT2 PE=1 SV=2	BCAT2	44287.73	O15382	O15382	2	0
11.7309	5.75771	11.6306	12.4231	13.743	12.7852	12.6328	12.7364	13.1425	14.0354	12.5426	13.2931	13.3002	13.9597	13.7063	13.9403	13.3921	13.5858	Homo sapiens	169	>sp|O15400|STX7_HUMAN Syntaxin-7 OS=Homo sapiens GN=STX7 PE=1 SV=4	STX7	29815.53	O15400	O15400	3	0.000342818
14.6698	14.8124	14.4909	14.879	15.0998	15.0624	15.0457	15.079	15.0524	14.6278	14.4625	14.442	14.8381	15.1156	14.9282	15.2418	15.1707	15.3581	Homo sapiens	170	>sp|O15427|MOT4_HUMAN Monocarboxylate transporter 4 OS=Homo sapiens GN=SLC16A3 PE=1 SV=1	SLC16A3	49469.38	O15427	O15427	6	0
9.70081	9.63555	9.12747	10.7068	11.0435	9.30863	10.463	10.5493	10.8676	9.42583	6.37134	9.33593	11.022	10.6079	10.3617	11.0902	11.4865	10.3042	Homo sapiens	171	>sp|O15431|COPT1_HUMAN High affinity copper uptake protein 1 OS=Homo sapiens GN=SLC31A1 PE=1 SV=1	SLC31A1	21090.62	O15431	O15431	1	0
9.60493	9.30954	7.9414	9.43	8.67671	9.28447	9.82533	9.43467	9.76432	9.05306	10.4183	9.74115	10.5648	10.5325	10.3994	10.0641	10.0396	10.1956	Homo sapiens	172	>sp|O15438|MRP3_HUMAN Canalicular multispecific organic anion transporter 2 OS=Homo sapiens GN=ABCC3 PE=1 SV=3	ABCC3	169342.87	O15438	O15438	7	0
12.9846	13.0631	12.8982	13.3676	13.3277	12.9008	13.2066	13.2176	13.2719	13.6871	13.1121	13.1609	13.3619	13.7526	13.2581	13.022	13.0976	13.5976	Homo sapiens	173	>sp|O15439|MRP4_HUMAN Multidrug resistance-associated protein 4 OS=Homo sapiens GN=ABCC4 PE=1 SV=3	ABCC4	149526.76	O15439	O15439	12	0
12.6767	12.5093	12.6636	12.5768	12.9325	12.2879	12.84	12.8423	12.567	12.5505	12.4259	12.8376	13.424	13.161	13.2781	13.5798	13.3762	13.143	Homo sapiens	174	>sp|O15460|P4HA2_HUMAN Prolyl 4-hydroxylase subunit alpha-2 OS=Homo sapiens GN=P4HA2 PE=1 SV=1	P4HA2	60901.93	O15460	O15460	9	0
11.8351	11.5823	11.7307	11.4473	12.2408	12.3155	12.1676	12.0375	12.469	12.4625	12.4597	12.192	13.107	12.6967	12.3016	11.1559	12.26	12.5774	Homo sapiens	175	>sp|O15498|YKT6_HUMAN Synaptobrevin homolog YKT6 OS=Homo sapiens GN=YKT6 PE=1 SV=1	YKT6	22417.58	O15498	O15498	2	0
14.7782	14.4277	15.1393	14.9078	14.8621	15.3343	15.353	15.1681	15.1124	15.3152	15.3927	15.4878	15.944	15.4797	16.005	15.7521	15.7666	15.3323	Homo sapiens	176	>sp|O15511|ARPC5_HUMAN Actin-related protein 2/3 complex subunit 5 OS=Homo sapiens GN=ARPC5 PE=1 SV=3	ARPC5	16320.42	O15511	O15511	6	0
6.62064	7.268	7.89878	8.16698	8.01762	10.0105	8.62291	8.08455	8.73677	5.41358	8.90631	6.52336	9.05852	8.79945	8.4691	7.88903	7.53516	8.80857	Homo sapiens	177	>sp|O15530|PDPK1_HUMAN 3-phosphoinositide-dependent protein kinase 1 OS=Homo sapiens GN=PDPK1 PE=1 SV=1	PDPK1	63151.85	O15530	O15530	1	0.001318392
16.3097	16.283	16.3104	16.241	16.0216	15.8832	15.5769	15.8474	16.21	15.4122	15.2521	15.3194	15.1984	15.74	15.467	15.2382	15.072	15.17	Homo sapiens	178	>sp|O43143|DHX15_HUMAN Pre-mRNA-splicing factor ATP-dependent RNA helicase DHX15 OS=Homo sapiens GN=DHX15 PE=1 SV=2	DHX15	90932.82	O43143	O43143	22	0
9.21639	9.09715	8.52767	12.3998	9.7267	10.2303	9.532	9.59951	8.68071	11.1085	10.3941	8.66087	11.3617	10.6322	10.9248	10.8116	7.71621	11.4265	Homo sapiens	179	>sp|O43148|MCES_HUMAN mRNA cap guanine-N7 methyltransferase OS=Homo sapiens GN=RNMT PE=1 SV=1	RNMT	54844.08	O43148	O43148	2	0.001609788
9.08926	8.44612	9.19342	7.94553	8.15316	9.88435	8.7156	6.99791	6.62508	7.3027	6.20574	7.39619	7.85707	7.93421	7.89642	8.47207	7.65687	7.68937	Homo sapiens	180	>sp|O43169|CYB5B_HUMAN Cytochrome b5 type B OS=Homo sapiens GN=CYB5B PE=1 SV=2	CYB5B	16332.15	O43169	O43169	1	0.001318392
11.9761	11.1954	11.9081	12.1709	11.5402	11.8312	10.3694	11.1125	9.82156	11.5937	11.557	11.5779	11.7235	12.4328	12.3119	11.8867	10.4482	10.9312	Homo sapiens	181	>sp|O43172|PRP4_HUMAN U4/U6 small nuclear ribonucleoprotein Prp4 OS=Homo sapiens GN=PRPF4 PE=1 SV=2	PRPF4	58449.18	O43172	O43172	6	0
16.0076	16.5689	16.4819	16.1	16.8608	16.3891	16.1582	16.6801	16.8623	15.3481	15.8255	15.7746	15.4753	16.1941	15.7943	15.8209	16.1846	15.8553	Homo sapiens	182	>sp|O43174|CP26A_HUMAN Cytochrome P450 26A1 OS=Homo sapiens GN=CYP26A1 PE=2 SV=2	CYP26A1	56198.64	O43174	O43174	1	0.003177629
16.3535	16.3651	16.3702	16.503	16.6759	16.6075	16.7553	16.6552	16.6282	16.851	16.9961	17.0553	17.0309	16.92	16.8509	17.0138	16.9597	16.9795	Homo sapiens	183	>sp|O43175|SERA_HUMAN D-3-phosphoglycerate dehydrogenase OS=Homo sapiens GN=PHGDH PE=1 SV=4	PHGDH	56650.5	O43175	O43175	21	0
14.1157	13.9141	13.4397	14.1171	13.9146	13.6983	14.2267	13.7335	14.047	13.3794	13.6059	13.3835	13.242	13.647	13.6022	13.3653	13.511	13.3896	Homo sapiens	184	>sp|O43237|DC1L2_HUMAN Cytoplasmic dynein 1 light intermediate chain 2 OS=Homo sapiens GN=DYNC1LI2 PE=1 SV=1	DYNC1LI2	54099.27	O43237	O43237	6	0
15.9173	15.8766	15.6775	15.9481	15.7501	15.5448	15.5274	15.5841	16.0295	15.4232	15.0768	15.0109	15.1561	15.5127	15.4967	15.2539	15.1941	15.3008	Homo sapiens	185	>sp|O43242|PSMD3_HUMAN 26S proteasome non-ATPase regulatory subunit 3 OS=Homo sapiens GN=PSMD3 PE=1 SV=2	PSMD3	60977.55	O43242	O43242	35	0
12.7479	13.2772	13.3619	13.7416	13.9249	14.0276	12.1417	13.5134	13.6866	12.244	12.8193	11.6755	12.7571	13.5228	13.1205	12.4061	12.6673	13.4123	Homo sapiens	186	>sp|O43251|RFOX2_HUMAN RNA binding protein fox-1 homolog 2 OS=Homo sapiens GN=RBFOX2 PE=1 SV=3;>sp|Q9NWB1|RFOX1_HUMAN RNA binding protein fox-1 homolog 1 OS=Homo sapiens GN=RBFOX1 PE=1 SV=2	RBFOX2;RBFOX1	41373.77;42784.31	O43251;Q9NWB1	O43251;Q9NWB1	2	0
11.5965	8.19746	11.3663	11.4928	10.0366	9.53547	11.7114	9.40422	8.58422	9.7241	11.3973	12.6079	11.6644	10.2056	10.1074	11.3433	11.0262	9.96526	Homo sapiens	187	>sp|O43252|PAPS1_HUMAN Bifunctional 3'-phosphoadenosine 5'-phosphosulfate synthase 1 OS=Homo sapiens GN=PAPSS1 PE=1 SV=2	PAPSS1	70833.14	O43252	O43252	1	0
12.8507	13.4006	12.8825	13.1961	12.7247	12.7879	12.5259	13.0457	13.0126	11.551	11.9086	8.15603	11.7041	11.8561	13.2475	11.6446	11.7269	13.7922	Homo sapiens	188	>sp|O43264|ZW10_HUMAN Centromere/kinetochore protein zw10 homolog OS=Homo sapiens GN=ZW10 PE=1 SV=3	ZW10	88829.47	O43264	O43264	2	0.00254696
7.942	8.5708	7.40631	7.42684	7.01529	9.10874	8.85752	7.27377	7.60049	8.00496	7.38662	6.0663	9.61412	8.03448	10.1923	9.75216	9.26097	9.76801	Homo sapiens	189	>sp|O43291|SPIT2_HUMAN Kunitz-type protease inhibitor 2 OS=Homo sapiens GN=SPINT2 PE=1 SV=2	SPINT2	28228.15	O43291	O43291	1	0
14.8646	14.9432	14.801	14.665	14.8332	14.3334	13.9916	14.5302	14.7432	14.8442	14.9156	14.5401	14.5192	15.2313	14.6453	14.6721	14.2445	15.028	Homo sapiens	190	>sp|O43324|MCA3_HUMAN Eukaryotic translation elongation factor 1 epsilon-1 OS=Homo sapiens GN=EEF1E1 PE=1 SV=1	EEF1E1	19810.57	O43324	O43324	9	0
14.6778	14.8816	15.0379	14.7493	14.4265	14.8971	14.4939	14.4386	14.6874	13.2717	13.09	13.5445	13.198	13.3184	12.849	13.3411	13.38	13.4061	Homo sapiens	191	>sp|O43390|HNRPR_HUMAN Heterogeneous nuclear ribonucleoprotein R OS=Homo sapiens GN=HNRNPR PE=1 SV=1	HNRNPR	70943.07	O43390	O43390	21	0
12.7722	12.6393	11.9976	12.9676	13.1517	12.5306	12.8956	12.9737	12.7067	12.343	10.8422	12.9664	12.8561	12.5989	12.1822	12.9836	13.3313	12.329	Homo sapiens	192	>sp|O43395|PRPF3_HUMAN U4/U6 small nuclear ribonucleoprotein Prp3 OS=Homo sapiens GN=PRPF3 PE=1 SV=2	PRPF3	77528.95	O43395	O43395	7	0
15.4323	15.2727	15.5529	15.3638	15.6407	15.8049	15.5413	15.6417	15.617	16.5275	16.6329	16.6555	16.741	16.3768	16.488	16.5513	16.9247	16.7337	Homo sapiens	193	>sp|O43396|TXNL1_HUMAN Thioredoxin-like protein 1 OS=Homo sapiens GN=TXNL1 PE=1 SV=3	TXNL1	32251.3	O43396	O43396	11	0
12.2306	12.2674	12.016	12.3001	12.7925	12.133	12.6742	12.5755	12.9726	12.4964	12.646	12.7475	11.9795	11.5306	12.2128	12.5994	12.4364	11.8839	Homo sapiens	194	>sp|O43399|TPD54_HUMAN Tumor protein D54 OS=Homo sapiens GN=TPD52L2 PE=1 SV=2	TPD52L2	22237.72	O43399	O43399	5	0
14.0225	12.3386	12.4082	13.8643	12.3057	12.7949	13.5161	12.4785	10.6267	13.9278	14.1266	13.6093	13.1526	13.5174	13.707	13.7804	13.2053	13.5387	Homo sapiens	195	>sp|O43402|EMC8_HUMAN ER membrane protein complex subunit 8 OS=Homo sapiens GN=EMC8 PE=1 SV=1	EMC8	23773.03	O43402	O43402	4	0
8.70946	10.9718	12.7031	12.3872	10.1545	12.1862	11.169	10.4835	7.01747	12.7775	12.5249	12.5584	12.4283	12.513	11.7848	11.6836	11.601	12.421	Homo sapiens	196	>sp|O43414|ERI3_HUMAN ERI1 exoribonuclease 3 OS=Homo sapiens GN=ERI3 PE=1 SV=2	ERI3	37238.21	O43414	O43414	1	0
12.3487	12.8024	13.1685	13.1655	13.6015	13.3217	13.7991	12.9223	13.2127	12.1983	12.3025	11.3814	13.1147	13.2163	13.0241	11.4853	11.7803	12.6432	Homo sapiens	197	>sp|O43432|IF4G3_HUMAN Eukaryotic translation initiation factor 4 gamma 3 OS=Homo sapiens GN=EIF4G3 PE=1 SV=2	EIF4G3	176652.25	O43432	O43432	3	0
12.7796	12.7463	12.8601	13.4298	13.0614	12.4339	13.834	12.4813	13.3833	13.4494	13.9288	13.8425	14.5529	14.4039	14.0494	14.0423	14.2542	14.4239	Homo sapiens	198	>sp|O43447|PPIH_HUMAN Peptidyl-prolyl cis-trans isomerase H OS=Homo sapiens GN=PPIH PE=1 SV=1	PPIH	19208.12	O43447	O43447	4	0
16.6303	16.9955	16.8062	16.4696	16.2899	16.3062	15.7642	16.3543	17.0169	16.3643	14.6694	14.8017	14.3501	15.173	15.2082	14.479	14.105	14.5606	Homo sapiens	199	>sp|O43464|HTRA2_HUMAN Serine protease HTRA2, mitochondrial OS=Homo sapiens GN=HTRA2 PE=1 SV=2	HTRA2	48840.85	O43464	O43464	1	0
15.6912	15.6441	16.1237	15.6965	16.1096	15.9682	16.1625	16.3323	15.9168	16.0385	16.4911	16.5844	16.9393	16.6066	16.581	16.6266	16.8898	16.6306	Homo sapiens	200	>sp|O43488|ARK72_HUMAN Aflatoxin B1 aldehyde reductase member 2 OS=Homo sapiens GN=AKR7A2 PE=1 SV=3	AKR7A2	39588.97	O43488	O43488	13	0
15.2708	15.5874	15.2027	15.4654	15.2531	15.0827	15.2086	15.1434	15.6613	14.6186	14.6166	15.4711	14.7922	15.0384	15.1391	15.3315	15.4611	14.319	Homo sapiens	201	>sp|O43491|E41L2_HUMAN Band 4.1-like protein 2 OS=Homo sapiens GN=EPB41L2 PE=1 SV=1	EPB41L2	112588.08	O43491	O43491	18	0
8.73945	10.0863	9.36793	11.621	12.4285	12.4165	12.261	11.8674	12.2202	8.0701	10.0174	10.0601	12.4882	11.3111	10.9932	13.2141	13.9705	13.4824	Homo sapiens	202	>sp|O43493|TGON2_HUMAN Trans-Golgi network integral membrane protein 2 OS=Homo sapiens GN=TGOLN2 PE=1 SV=2	TGOLN2	51112.8	O43493	O43493	3	0
15.221	13.1059	14.3429	14.8352	14.6293	14.0606	15.2748	14.7454	14.3476	14.396	14.4507	15.233	15.115	13.5396	14.6718	16.0292	15.8064	14.7636	Homo sapiens	203	>sp|O43583|DENR_HUMAN Density-regulated protein OS=Homo sapiens GN=DENR PE=1 SV=2	DENR	22092.01	O43583	O43583	7	0
15.0555	15.092	15.1668	15.4973	15.2045	14.8412	14.8744	15.2559	15.2231	14.2643	14.3312	14.2976	14.4275	14.8674	14.5615	14.4624	14.2299	14.4322	Homo sapiens	204	>sp|O43592|XPOT_HUMAN Exportin-T OS=Homo sapiens GN=XPOT PE=1 SV=2	XPOT	109964.18	O43592	O43592	12	0
14.4294	14.4106	14.0371	14.4574	14.2558	14.0285	13.9624	14.2501	14.4325	14.2686	14.0871	13.705	13.3181	13.9127	13.7914	13.535	13.3971	13.7629	Homo sapiens	205	>sp|O43615|TIM44_HUMAN Mitochondrial import inner membrane translocase subunit TIM44 OS=Homo sapiens GN=TIMM44 PE=1 SV=2	TIMM44	51355.72	O43615	O43615	15	0
13.7193	12.9831	13.4341	13.5903	13.6363	13.9966	13.7816	13.586	13.9172	13.8116	14.5406	14.1325	14.0286	14.1461	14.1462	14.6136	14.4768	14.53	Homo sapiens	206	>sp|O43617|TPPC3_HUMAN Trafficking protein particle complex subunit 3 OS=Homo sapiens GN=TRAPPC3 PE=1 SV=1	TRAPPC3	20274.1	O43617	O43617	4	0
13.0694	13.4509	13.3517	13.508	13.5899	13.518	13.6446	13.6029	13.2	14.0516	14.2802	14.5451	14.7313	14.5155	14.2837	14.7659	14.8035	14.7452	Homo sapiens	207	>sp|O43633|CHM2A_HUMAN Charged multivesicular body protein 2a OS=Homo sapiens GN=CHMP2A PE=1 SV=1	CHMP2A	25103.93	O43633	O43633	6	0
8.28435	6.44062	8.44636	9.09488	9.55062	8.30657	8.63773	7.82027	7.09452	10.0712	8.26799	9.08521	9.12763	7.73765	9.89451	9.84415	10.71	8.89956	Homo sapiens	208	>sp|O43657|TSN6_HUMAN Tetraspanin-6 OS=Homo sapiens GN=TSPAN6 PE=1 SV=1	TSPAN6	27563.27	O43657	O43657	1	0
12.7572	10.6998	11.4735	13.2895	12.8418	13.2727	13.0864	13.1594	12.6239	13.3517	11.661	13.3923	12.3949	12.1434	12.3999	13.3901	13.8274	12.5921	Homo sapiens	209	>sp|O43660|PLRG1_HUMAN Pleiotropic regulator 1 OS=Homo sapiens GN=PLRG1 PE=1 SV=1	PLRG1	57193.84	O43660	O43660	4	0.001318392
8.7539	9.77299	9.20766	9.15535	10.0953	8.44315	10.1357	8.99253	10.6152	9.28525	11.3284	10.6229	10.8661	9.76992	10.4105	11.1238	10.7546	10.5306	Homo sapiens	210	>sp|O43665|RGS10_HUMAN Regulator of G-protein signaling 10 OS=Homo sapiens GN=RGS10 PE=1 SV=2	RGS10	20235.75	O43665	O43665	1	0.001609788
13.5792	13.9206	13.4118	13.4361	14.0846	13.5465	14.0242	13.583	14.1196	13.3825	13.58	13.8682	13.0288	13.3404	13.2067	13.9505	14.2727	13.7026	Homo sapiens	211	>sp|O43670|ZN207_HUMAN BUB3-interacting and GLEBS motif-containing protein ZNF207 OS=Homo sapiens GN=ZNF207 PE=1 SV=1	ZNF207	50750.51	O43670	O43670	6	0
11.4127	10.4136	10.4167	8.28788	8.06105	11.5264	7.61478	8.21032	7.60028	13.099	11.6587	11.5228	11.4221	11.9214	11.0827	8.28145	9.37373	10.2727	Homo sapiens	212	>sp|O43678|NDUA2_HUMAN NADH dehydrogenase [ubiquinone] 1 alpha subcomplex subunit 2 OS=Homo sapiens GN=NDUFA2 PE=1 SV=3	NDUFA2	10921.56	O43678	O43678	1	0.001609788
12.7071	13.1038	13.1096	13.0696	13.2321	13.2252	13.1943	13.0125	13.2036	13.0063	12.9642	12.6822	12.8971	13.2253	13.2039	13.0639	13.2264	13.3055	Homo sapiens	213	>sp|O43681|ASNA_HUMAN ATPase ASNA1 OS=Homo sapiens GN=ASNA1 PE=1 SV=2	ASNA1	38792.77	O43681	O43681	7	0
15.456	15.5636	15.2239	15.6356	15.4531	15.3486	15.0726	15.2851	15.5047	14.8886	14.5027	14.668	14.4873	14.8909	14.5713	14.6001	14.6019	14.7464	Homo sapiens	214	>sp|O43684|BUB3_HUMAN Mitotic checkpoint protein BUB3 OS=Homo sapiens GN=BUB3 PE=1 SV=1	BUB3	37154.77	O43684	O43684	12	0
16.2677	16.4528	16.795	16.2829	16.5603	16.9298	16.6445	16.5531	16.6198	17.2394	17.4823	17.2803	17.5063	17.0859	17.4284	17.3264	17.4176	17.3202	Homo sapiens	215	>sp|O43707|ACTN4_HUMAN Alpha-actinin-4 OS=Homo sapiens GN=ACTN4 PE=1 SV=2	ACTN4	104854.04	O43707	O43707	44	0
13.1404	13.1324	11.438	13.0167	13.2944	11.0008	13.184	11.7129	12.4246	7.39342	9.44448	10.6557	12.5788	12.1163	10.4774	12.8355	12.4439	12.2731	Homo sapiens	216	>sp|O43709|WBS22_HUMAN Probable 18S rRNA (guanine-N(7))-methyltransferase OS=Homo sapiens GN=WBSCR22 PE=1 SV=2	WBSCR22	31880.37	O43709	O43709	1	0
14.4208	14.4588	14.2087	14.57	14.6134	14.5197	14.4826	14.3826	14.2082	14.5418	14.3533	14.6033	14.5228	14.7128	14.9877	15.1668	15.0022	14.5589	Homo sapiens	217	>sp|O43719|HTSF1_HUMAN HIV Tat-specific factor 1 OS=Homo sapiens GN=HTATSF1 PE=1 SV=1	HTATSF1	85852.79	O43719	O43719	13	0
13.9845	13.7646	13.5302	13.7368	13.5708	13.2233	13.3724	13.4745	13.6441	12.9215	12.6035	12.4224	12.7757	12.9824	13.2138	12.5418	12.4787	12.5156	Homo sapiens	218	>sp|O43747|AP1G1_HUMAN AP-1 complex subunit gamma-1 OS=Homo sapiens GN=AP1G1 PE=1 SV=5	AP1G1	91351.45	O43747	O43747	15	0
9.54446	9.40632	9.97961	8.06912	7.97813	8.15241	8.00011	7.71999	7.37631	10.9246	11.0123	10.0491	6.57448	7.77423	8.39953	8.66193	9.57286	8.81161	Homo sapiens	219	>sp|O43759|SNG1_HUMAN Synaptogyrin-1 OS=Homo sapiens GN=SYNGR1 PE=1 SV=2	SYNGR1	25455.6	O43759	O43759	1	0.001609788
12.5627	12.821	12.8392	12.8604	13.104	13.0851	13.4074	13.3091	13.1931	13.6809	13.6168	13.5181	13.4932	13.2741	13.4974	13.6655	13.7248	13.7122	Homo sapiens	220	>sp|O43760|SNG2_HUMAN Synaptogyrin-2 OS=Homo sapiens GN=SYNGR2 PE=1 SV=1	SYNGR2	24810.05	O43760	O43760	1	0
10.4952	8.51994	9.80356	10.208	6.94118	10.5163	9.86124	9.34394	11.3094	12.1796	9.9716	10.6967	12.6333	10.5994	11.2782	10.1757	10.4102	11.01	Homo sapiens	221	>sp|O43765|SGTA_HUMAN Small glutamine-rich tetratricopeptide repeat-containing protein alpha OS=Homo sapiens GN=SGTA PE=1 SV=1	SGTA	34063.08	O43765	O43765	2	0
12.4633	12.7711	11.2862	12.7354	14.4909	13.2787	14.7232	12.475	14.2822	12.7808	11.5955	12.6754	11.3388	10.7841	13.199	16.3522	16.8385	13.9705	Homo sapiens	222	>sp|O43768|ENSA_HUMAN Alpha-endosulfine OS=Homo sapiens GN=ENSA PE=1 SV=1	ENSA	13389.01	O43768	O43768	5	0.001609788
14.7229	14.9195	14.8338	14.9585	14.8349	14.9945	14.7567	14.7632	15.0161	14.2493	14.4788	14.611	14.5688	14.8954	14.6305	14.6408	14.6107	14.4805	Homo sapiens	223	>sp|O43776|SYNC_HUMAN Asparagine--tRNA ligase, cytoplasmic OS=Homo sapiens GN=NARS PE=1 SV=1	NARS	62942.91	O43776	O43776	16	0
13.0687	13.2206	12.8905	13.3787	13.0455	12.6165	12.6273	12.9652	13.0462	11.7342	11.1841	11.2439	11.1791	11.7027	11.9919	10.999	10.7923	10.5599	Homo sapiens	225	>sp|O43795|MYO1B_HUMAN Unconventional myosin-Ib OS=Homo sapiens GN=MYO1B PE=1 SV=3	MYO1B	131985.04	O43795	O43795	38	0
14.4662	14.4524	14.444	14.3523	14.4677	14.4925	14.3191	14.585	14.0727	15.2443	15.6077	15.1409	14.9624	15.0337	15.3191	15.1676	15.3286	15.2122	Homo sapiens	226	>sp|O43809|CPSF5_HUMAN Cleavage and polyadenylation specificity factor subunit 5 OS=Homo sapiens GN=NUDT21 PE=1 SV=1	NUDT21	26227.28	O43809	O43809	11	0
10.1438	10.3808	10.8397	11.2254	10.7191	10.8828	11.6746	11.2566	11.0417	12.6519	11.6144	12.1206	11.852	12.1966	11.6592	10.4857	11.3104	11.2757	Homo sapiens	227	>sp|O43813|LANC1_HUMAN LanC-like protein 1 OS=Homo sapiens GN=LANCL1 PE=1 SV=1	LANCL1	45283.09	O43813	O43813	3	0.000674992
11.051	11.0044	11.1659	11.2819	10.3339	10.1227	9.81078	9.97107	10.1364	9.93832	9.05536	9.62269	10.1994	9.79735	10.2645	8.94251	8.79255	8.47554	Homo sapiens	228	>sp|O43818|U3IP2_HUMAN U3 small nucleolar RNA-interacting protein 2 OS=Homo sapiens GN=RRP9 PE=1 SV=1	RRP9	51840.65	O43818	O43818	3	0
7.86476	7.10839	6.2422	7.74893	6.59098	7.44874	7.24619	8.11116	8.60248	4.95227	7.3517	5.88286	9.34338	9.32413	9.2286	7.98886	8.12487	8.43115	Homo sapiens	229	>sp|O43826|G6PT1_HUMAN Glucose-6-phosphate translocase OS=Homo sapiens GN=SLC37A4 PE=1 SV=1	SLC37A4	46360.08	O43826	O43826	1	0
13.9466	13.7513	13.7545	13.9185	13.9368	13.9935	14.1574	13.8097	14.0116	14.0776	14.6765	14.2573	14.5378	14.3538	14.5411	14.524	14.6618	14.6173	Homo sapiens	230	>sp|O43837|IDH3B_HUMAN Isocitrate dehydrogenase [NAD] subunit beta, mitochondrial OS=Homo sapiens GN=IDH3B PE=1 SV=2	IDH3B	42183.67	O43837	O43837	12	0
11.2596	11.1013	10.9875	11.1235	10.8307	10.3464	11.1511	11.4973	10.6107	10.5618	10.7747	10.612	11.1613	11.1723	11.1019	10.7883	9.94881	10.4897	Homo sapiens	231	>sp|O43847|NRDC_HUMAN Nardilysin OS=Homo sapiens GN=NRDC PE=1 SV=2	NRDC	131571.62	O43847	O43847	10	0
15.1755	15.1243	14.9536	15.3898	15.4697	15.203	15.3193	15.1751	15.4521	14.8884	14.5947	14.5999	15.0329	15.1311	15.2104	15.3041	15.2097	15.2702	Homo sapiens	232	>sp|O43852|CALU_HUMAN Calumenin OS=Homo sapiens GN=CALU PE=1 SV=2	CALU	37106.78	O43852	O43852	16	0
12.2331	12.3653	12.5121	12.7391	13.1666	12.1739	12.8634	12.511	13.0054	13.204	12.7352	13.0654	13.5976	13.7617	13.7712	13.6139	13.3217	13.2805	Homo sapiens	233	>sp|O43865|SAHH2_HUMAN Adenosylhomocysteinase 2 OS=Homo sapiens GN=AHCYL1 PE=1 SV=2	AHCYL1	58951.42	O43865	O43865	10	0
13.4079	14.9016	13.7933	14.9806	15.1366	14.7822	14.0771	14.6739	15.1158	8.34355	14.2937	13.9169	15.9351	15.1561	13.3147	14.5233	14.5757	14.1821	Homo sapiens	234	>sp|O43933|PEX1_HUMAN Peroxisome biogenesis factor 1 OS=Homo sapiens GN=PEX1 PE=1 SV=1	PEX1	142867.02	O43933	O43933	2	0.001609788
17.2618	17.376	17.5408	17.4999	17.9119	17.489	18.2292	17.8386	18.0022	15.9221	16.3079	15.7523	16.0685	15.9999	16.1761	17.1822	17.3667	17.4952	Homo sapiens	235	>sp|O60218|AK1BA_HUMAN Aldo-keto reductase family 1 member B10 OS=Homo sapiens GN=AKR1B10 PE=1 SV=2	AKR1B10	36019.58	O60218	O60218	17	0
10.9039	10.714	11.3912	10.5514	11.3086	10.4525	10.6811	11.0999	10.2661	10.5798	9.16805	8.51714	10.3419	10.1576	12.5565	10.3325	10.3014	9.36703	Homo sapiens	236	>sp|O60231|DHX16_HUMAN Putative pre-mRNA-splicing factor ATP-dependent RNA helicase DHX16 OS=Homo sapiens GN=DHX16 PE=1 SV=2	DHX16	119263.58	O60231	O60231	2	0
12.5365	12.0431	12.044	12.4306	12.2858	12.6499	12.4639	12.275	12.2825	11.9748	11.8685	11.6852	12.0512	12.4397	12.2971	12.5298	12.1218	12.5106	Homo sapiens	237	>sp|O60256|KPRB_HUMAN Phosphoribosyl pyrophosphate synthase-associated protein 2 OS=Homo sapiens GN=PRPSAP2 PE=1 SV=1	PRPSAP2	40925.73	O60256	O60256	7	0
12.102	12.3378	12.7935	12.1486	11.3352	11.9757	11.4315	11.4131	11.5238	12.1093	11.712	10.6725	11.9168	12.2406	11.3698	10.0551	9.73734	11.8433	Homo sapiens	238	>sp|O60264|SMCA5_HUMAN SWI/SNF-related matrix-associated actin-dependent regulator of chromatin subfamily A member 5 OS=Homo sapiens GN=SMARCA5 PE=1 SV=1	SMARCA5	121905.35	O60264	O60264	24	0
14.3258	14.0091	14.0623	14.4179	14.5477	14.4142	14.6173	14.2018	14.5783	14.7179	14.6333	15.2437	15.3546	14.9593	15.1339	15.8804	15.7953	15.2929	Homo sapiens	239	>sp|O60271|JIP4_HUMAN C-Jun-amino-terminal kinase-interacting protein 4 OS=Homo sapiens GN=SPAG9 PE=1 SV=4	SPAG9	146205.4	O60271	O60271	34	0
10.5934	10.4091	10.3979	10.2917	9.79465	11.3986	7.06395	11.1915	11.3881	9.80089	10.9591	8.65642	9.71854	9.81959	8.86157	7.57249	7.50509	10.1699	Homo sapiens	240	>sp|O60287|NPA1P_HUMAN Nucleolar pre-ribosomal-associated protein 1 OS=Homo sapiens GN=URB1 PE=1 SV=4	URB1	254389.07	O60287	O60287	1	0.000342818
7.4106	7.52479	8.19233	6.92049	7.82344	7.49045	8.36096	9.03483	8.75615	7.89267	5.67843	7.3981	8.08548	9.32261	7.86942	9.0662	6.20124	7.85579	Homo sapiens	241	>sp|O60306|AQR_HUMAN Intron-binding protein aquarius OS=Homo sapiens GN=AQR PE=1 SV=4	AQR	171295.28	O60306	O60306	1	0
13.3413	13.3672	13.1342	13.4154	13.3268	12.3337	12.7207	13.0147	12.8457	13.1294	13.0062	12.6339	12.2407	12.7051	12.0508	11.9387	12.0308	12.8407	Homo sapiens	242	>sp|O60313|OPA1_HUMAN Dynamin-like 120 kDa protein, mitochondrial OS=Homo sapiens GN=OPA1 PE=1 SV=3	OPA1	111630.65	O60313	O60313	17	0
11.9257	11.9425	12.3875	12.8507	12.6124	13.048	12.4997	12.4359	12.4573	13.4721	12.8507	13.0135	12.8669	13.0732	13.3965	13.8641	13.2706	13.2888	Homo sapiens	243	>sp|O60341|KDM1A_HUMAN Lysine-specific histone demethylase 1A OS=Homo sapiens GN=KDM1A PE=1 SV=2	KDM1A	92902.63	O60341	O60341	4	0
8.55574	6.77341	6.78211	9.65559	9.5065	8.61465	11.2837	9.55176	9.74442	9.64252	8.74363	10.079	11.2536	10.3454	9.48557	9.50909	9.85481	10.11	Homo sapiens	244	>sp|O60361|NDK8_HUMAN Putative nucleoside diphosphate kinase OS=Homo sapiens GN=NME2P1 PE=5 SV=1	NME2P1	15529.06	O60361	O60361	1	0
7.16963	12.0145	11.7644	12.3611	12.3325	12.6477	12.5395	8.17782	12.9612	7.63579	7.47246	9.10474	11.4061	12.2823	12.9088	11.9677	11.8235	9.28035	Homo sapiens	245	>sp|O60427|FADS1_HUMAN Fatty acid desaturase 1 OS=Homo sapiens GN=FADS1 PE=1 SV=3	FADS1	51964.27	O60427	O60427	1	0
14.0655	14.0504	13.9967	14.2906	13.5869	14.3748	14.1841	14.0111	14.0673	13.9049	14.5365	14.2007	15.5892	14.8803	15.0509	14.6682	14.4859	14.7808	Homo sapiens	246	>sp|O60437|PEPL_HUMAN Periplakin OS=Homo sapiens GN=PPL PE=1 SV=4	PPL	204746.82	O60437	O60437	14	0
12.5079	12.22	12.5079	13.3249	13.5061	12.6188	13.3843	12.9388	13.2273	11.9117	11.9669	12.0481	13.1561	12.7486	12.8647	12.629	12.5933	12.59	Homo sapiens	247	>sp|O60488|ACSL4_HUMAN Long-chain-fatty-acid--CoA ligase 4 OS=Homo sapiens GN=ACSL4 PE=1 SV=2	ACSL4	79188.04	O60488	O60488	15	0
15.1381	15.1691	15.0755	15.102	15.3578	15.248	15.3568	15.2816	15.1919	14.6662	15.139	15.6815	15.6588	15.7941	15.5707	16.0834	16.2689	15.553	Homo sapiens	248	>sp|O60493|SNX3_HUMAN Sorting nexin-3 OS=Homo sapiens GN=SNX3 PE=1 SV=3	SNX3	18762.35	O60493	O60493	12	0
12.3464	12.1394	12.1909	12.4539	12.667	11.8672	12.4868	11.9909	11.7961	12.6993	12.5086	12.5938	12.8136	13.22	12.8299	13.134	13.0566	13.2923	Homo sapiens	249	>sp|O60502|OGA_HUMAN Protein O-GlcNAcase OS=Homo sapiens GN=MGEA5 PE=1 SV=2	MGEA5	102915.11	O60502	O60502	13	0
12.5643	13.0825	12.9021	13.0086	13.1241	13.1841	12.9396	12.9056	12.4646	11.9025	12.779	13.4106	13.5885	13.3593	13.2345	13.7681	14.0175	13.0624	Homo sapiens	250	>sp|O60504|VINEX_HUMAN Vinexin OS=Homo sapiens GN=SORBS3 PE=1 SV=2	SORBS3	75341.07	O60504	O60504	3	0
15.6289	16.0157	16.1059	15.7785	15.6126	15.9388	15.4929	15.6086	15.7106	14.6638	14.5503	13.9862	14.5129	14.7253	14.5951	14.8221	14.8919	15.5018	Homo sapiens	251	>sp|O60506|HNRPQ_HUMAN Heterogeneous nuclear ribonucleoprotein Q OS=Homo sapiens GN=SYNCRIP PE=1 SV=2	SYNCRIP	69602.62	O60506	O60506	20	0
8.81741	9.29453	8.70448	8.14279	9.47783	7.59843	8.44337	9.07686	9.25983	9.0463	6.58159	6.95273	8.16946	7.7538	6.93861	7.82977	6.74089	9.16957	Homo sapiens	252	>sp|O60518|RNBP6_HUMAN Ran-binding protein 6 OS=Homo sapiens GN=RANBP6 PE=1 SV=2	RANBP6	124713.56	O60518	O60518	1	0.007559055
11.153	11.2901	11.2594	11.3671	11.2133	10.4446	10.1122	11.1582	10.6724	9.67793	9.4058	9.00946	9.84648	9.3111	9.19254	10.1693	10.0851	11.0459	Homo sapiens	253	>sp|O60524|NEMF_HUMAN Nuclear export mediator factor NEMF OS=Homo sapiens GN=NEMF PE=1 SV=4	NEMF	122954.43	O60524	O60524	5	0
13.8165	13.9183	14.155	13.8937	13.3969	14.1487	13.1679	13.4738	13.7867	13.9105	13.6962	14.1037	13.7802	13.6035	13.5603	13.7905	13.6826	13.5677	Homo sapiens	254	>sp|O60568|PLOD3_HUMAN Procollagen-lysine,2-oxoglutarate 5-dioxygenase 3 OS=Homo sapiens GN=PLOD3 PE=1 SV=1	PLOD3	84785.15	O60568	O60568	19	0
11.404	11.7301	11.6167	11.1581	11.1513	11.6799	10.8726	11.5242	11.5685	11.2665	10.8803	11.0619	10.5405	10.6655	11.0849	10.6041	10.5943	10.1288	Homo sapiens	255	>sp|O60573|IF4E2_HUMAN Eukaryotic translation initiation factor 4E type 2 OS=Homo sapiens GN=EIF4E2 PE=1 SV=1	EIF4E2	28361.95	O60573	O60573	2	0.000342818
15.1417	14.908	14.9371	15.0503	15.0299	14.8473	15.0391	14.9718	14.9884	14.4901	14.4325	14.4536	14.8861	14.9777	14.9533	14.4959	14.5896	14.5289	Homo sapiens	256	>sp|O60610|DIAP1_HUMAN Protein diaphanous homolog 1 OS=Homo sapiens GN=DIAPH1 PE=1 SV=2	DIAPH1	141347.32	O60610	O60610	14	0
7.81163	8.09577	7.27964	9.08427	7.81073	8.4046	8.62626	8.89584	5.04313	7.87706	8.89043	8.17094	9.20915	9.30486	9.53761	7.45843	8.97301	8.14791	Homo sapiens	257	>sp|O60613|SEP15_HUMAN 15 kDa selenoprotein OS=Homo sapiens GN=SEP15 PE=1 SV=3	15-Sep	17790.39	O60613	O60613	2	0
14.5676	15.0038	15.1346	14.7904	15.2662	15.9281	15.3848	15.8035	15.5043	8.76299	14.5533	14.4156	16.7753	16.8771	15.356	16.3482	16.7766	15.2752	Homo sapiens	258	>sp|O60637|TSN3_HUMAN Tetraspanin-3 OS=Homo sapiens GN=TSPAN3 PE=2 SV=1	TSPAN3	28017.7	O60637	O60637	3	0.000342818
14.0005	13.7497	13.9029	14.1834	14.6001	14.4089	14.6998	14.3343	14.6522	14.6634	14.5208	14.8693	14.7311	14.3456	14.7796	15.0175	15.1921	14.5864	Homo sapiens	259	>sp|O60664|PLIN3_HUMAN Perilipin-3 OS=Homo sapiens GN=PLIN3 PE=1 SV=3	PLIN3	47074.96	O60664	O60664	20	0
9.29819	8.99708	8.77085	9.47557	8.77363	8.87293	7.28294	8.00645	8.8364	9.10836	9.14668	7.49251	9.72652	9.65163	9.41991	8.46862	8.48208	10.3795	Homo sapiens	260	>sp|O60678|ANM3_HUMAN Protein arginine N-methyltransferase 3 OS=Homo sapiens GN=PRMT3 PE=1 SV=3	PRMT3	59876.14	O60678	O60678	3	0
12.2338	12.3633	12.2495	12.3216	12.0962	11.5182	11.5339	11.6193	12.3328	11.4156	11.1909	11.2298	11.3526	12.0256	11.5958	11.4788	11.3148	11.5635	Homo sapiens	261	>sp|O60684|IMA7_HUMAN Importin subunit alpha-7 OS=Homo sapiens GN=KPNA6 PE=1 SV=1	KPNA6	60029.5	O60684	O60684	8	0
16.2243	16.3211	16.0467	16.3752	16.6108	16.2574	16.3994	16.3015	16.52	16.2574	16.1017	16.7189	16.6467	16.9961	16.6219	16.9905	17.0289	16.6699	Homo sapiens	262	>sp|O60701|UGDH_HUMAN UDP-glucose 6-dehydrogenase OS=Homo sapiens GN=UGDH PE=1 SV=1	UGDH	55024.08	O60701	O60701	28	0
16.5085	16.7358	16.2503	16.7022	16.582	16.4169	16.3601	16.6416	16.8856	15.8055	15.5334	15.4508	15.4646	16.085	15.7053	15.667	15.3464	15.7948	Homo sapiens	263	>sp|O60716|CTND1_HUMAN Catenin delta-1 OS=Homo sapiens GN=CTNND1 PE=1 SV=1	CTNND1	108170.02	O60716	O60716	17	0
12.5888	12.7329	13.0138	12.7945	12.9704	12.9055	12.6585	12.9121	12.9175	12.892	13.1504	13.1889	13.4034	13.2512	13.3739	13.2728	13.3466	13.0953	Homo sapiens	264	>sp|O60749|SNX2_HUMAN Sorting nexin-2 OS=Homo sapiens GN=SNX2 PE=1 SV=2	SNX2	58471.1	O60749	O60749	8	0
9.66998	9.36958	9.5281	8.67676	9.34729	10.2083	7.8869	7.76588	7.93684	8.66135	8.12621	7.97208	10.2419	9.63901	8.06158	8.14349	7.35515	10.0499	Homo sapiens	265	>sp|O60762|DPM1_HUMAN Dolichol-phosphate mannosyltransferase subunit 1 OS=Homo sapiens GN=DPM1 PE=1 SV=1	DPM1	29634.27	O60762	O60762	3	0.000342818
15.599	15.7575	15.6034	15.788	15.8294	15.7	15.5521	15.6888	15.7895	14.9503	14.951	15.1943	15.3399	15.5051	14.9446	15.2102	15.004	15.3414	Homo sapiens	266	>sp|O60763|USO1_HUMAN General vesicular transport factor p115 OS=Homo sapiens GN=USO1 PE=1 SV=2	USO1	107895.26	O60763	O60763	16	0
13.3212	13.0743	12.7566	14.0442	12.7387	11.9948	11.9776	13.0185	12.7342	10.4731	10.0588	10.5947	8.66149	10.436	9.26956	11.5736	10.2835	10.879	Homo sapiens	267	>sp|O60783|RT14_HUMAN 28S ribosomal protein S14, mitochondrial OS=Homo sapiens GN=MRPS14 PE=1 SV=1	MRPS14	15138.7	O60783	O60783	1	0.001002674
11.1549	10.5555	10.4554	10.9409	11.209	10.6766	11.5703	10.8201	10.9581	11.8261	10.7068	11.3112	12.1705	10.9139	11.4545	11.622	10.4405	11.0742	Homo sapiens	268	>sp|O60784|TOM1_HUMAN Target of Myb protein 1 OS=Homo sapiens GN=TOM1 PE=1 SV=2	TOM1	53818.43	O60784	O60784	9	0
19.2165	19.4199	19.0633	18.8107	19.1851	18.2035	18.873	19.0126	18.4157	19.9708	19.588	18.2534	17.8079	18.3151	18.5454	18.3626	18.3536	19.4002	Homo sapiens	269	>sp|O60814|H2B1K_HUMAN Histone H2B type 1-K OS=Homo sapiens GN=HIST1H2BK PE=1 SV=3;>sp|P57053|H2BFS_HUMAN Histone H2B type F-S OS=Homo sapiens GN=H2BFS PE=1 SV=2;>sp|P58876|H2B1D_HUMAN Histone H2B type 1-D OS=Homo sapiens GN=HIST1H2BD PE=1 SV=2;>sp|P62807|H2B1C_HUMAN Histone H2B type 1-C/E/F/G/I OS=Homo sapiens GN=HIST1H2BC PE=1 SV=4;>sp|Q5QNW6|H2B2F_HUMAN Histone H2B type 2-F OS=Homo sapiens GN=…	HIST1H2BK;H2BFS;HIST1H2BD;HIST1H2BC;HIST2H2BF;HIST1H2BH;HIST1H2BN;HIST1H2BM	13890.13;13944.19;13936.16;13906.13;13920.16;13892.11;13922.13;13989.27	O60814;P57053;P58876;P62807;Q5QNW6;Q93079;Q99877;Q99879	O60814;P57053;P58876;P62807;Q5QNW6;Q93079;Q99877;Q99879	12	0
12.3229	12.4792	10.5692	13.3324	12.7886	12.1496	13.7461	12.808	13.5332	10.2221	10.3878	11.871	10.1353	11.0649	11.6182	14.5784	14.3364	11.8733	Homo sapiens	270	>sp|O60828|PQBP1_HUMAN Polyglutamine-binding protein 1 OS=Homo sapiens GN=PQBP1 PE=1 SV=1	PQBP1	30472.25	O60828	O60828	2	0
12.7106	12.4542	12.8098	12.5668	12.0953	12.4684	12.1471	11.5037	11.9517	11.989	11.7841	13.739	11.672	12.0452	11.3093	10.5688	10.5006	9.23158	Homo sapiens	271	>sp|O60832|DKC1_HUMAN H/ACA ribonucleoprotein complex subunit 4 OS=Homo sapiens GN=DKC1 PE=1 SV=3	DKC1	57674.09	O60832	O60832	12	0
14.1885	14.2815	14.335	14.3425	13.9353	14.1129	14.0269	14.1119	14.2703	13.3841	13.4269	14.4166	13.8769	13.6074	13.427	13.505	13.3278	12.7205	Homo sapiens	272	>sp|O60841|IF2P_HUMAN Eukaryotic translation initiation factor 5B OS=Homo sapiens GN=EIF5B PE=1 SV=4	EIF5B	138826.85	O60841	O60841	30	0
15.4636	15.7363	15.6638	15.7008	15.8829	16.0216	15.8378	15.9402	15.9743	15.752	16.1385	16.2527	16.4056	16.2215	16.0972	16.2928	16.3869	16.2488	Homo sapiens	273	>sp|O60869|EDF1_HUMAN Endothelial differentiation-related factor 1 OS=Homo sapiens GN=EDF1 PE=1 SV=1	EDF1	16368.68	O60869	O60869	19	0
16.2975	16.5613	16.4092	16.4355	16.4109	16.3017	16.3953	16.4111	16.6036	15.8735	16.0934	16.2141	16.0888	16.372	15.9971	16.0516	16.0738	16.0654	Homo sapiens	274	>sp|O60884|DNJA2_HUMAN DnaJ homolog subfamily A member 2 OS=Homo sapiens GN=DNAJA2 PE=1 SV=1	DNAJA2	45745.6	O60884	O60884	11	0
11.244	11.1553	12.0835	11.729	11.7104	11.7154	12.0419	11.7384	11.6646	12.3913	12.4364	12.1271	11.9814	12.1981	11.8448	12.1686	12.4031	12.8176	Homo sapiens	275	>sp|O60888|CUTA_HUMAN Protein CutA OS=Homo sapiens GN=CUTA PE=1 SV=2	CUTA	19116.32	O60888	O60888	1	0
10.2538	6.78996	6.71154	9.52538	8.07913	6.23052	9.62793	8.60371	7.1572	7.27623	7.3825	6.74666	6.31946	9.59756	8.05202	9.81977	6.79919	8.79868	Homo sapiens	276	>sp|O60934|NBN_HUMAN Nibrin OS=Homo sapiens GN=NBN PE=1 SV=1	NBN	84959.03	O60934	O60934	1	0
17.7633	17.8562	17.722	17.7413	17.673	17.6437	17.5114	17.6392	17.7599	17.3618	17.4351	17.204	17.003	17.4255	17.2058	16.8484	16.9366	17.0954	Homo sapiens	277	>sp|O75083|WDR1_HUMAN WD repeat-containing protein 1 OS=Homo sapiens GN=WDR1 PE=1 SV=4	WDR1	66193.52	O75083	O75083	25	0
12.6409	11.3416	11.785	12.9588	12.6053	12.3776	13.044	12.2444	12.2153	11.9984	10.814	11.8788	12.4614	11.4691	11.3429	12.3017	11.3452	11.9732	Homo sapiens	278	>sp|O75116|ROCK2_HUMAN Rho-associated protein kinase 2 OS=Homo sapiens GN=ROCK2 PE=1 SV=4	ROCK2	160899.82	O75116	O75116	4	0
11.8835	11.316	11.1956	12.0792	11.7152	11.9146	11.6192	11.6059	10.8491	11.1286	11.0384	11.6281	11.3449	11.5962	11.4957	11.192	11.0971	10.5747	Homo sapiens	279	>sp|O75122|CLAP2_HUMAN CLIP-associating protein 2 OS=Homo sapiens GN=CLASP2 PE=1 SV=2	CLASP2	141132.76	O75122	O75122	8	0
15.524	15.6939	15.448	15.5305	15.7659	15.0411	15.8123	15.9167	15.7925	16.5842	16.9926	16.444	16.3455	16.5145	16.4973	16.181	16.3209	16.5281	Homo sapiens	280	>sp|O75131|CPNE3_HUMAN Copine-3 OS=Homo sapiens GN=CPNE3 PE=1 SV=1	CPNE3	60130.63	O75131	O75131	11	0
12.497	12.6666	12.3317	12.5749	12.6633	12.1375	12.4765	12.6107	13.0444	11.9953	11.6213	11.5897	12.4618	12.2819	12.0734	11.466	11.9923	12.2462	Homo sapiens	281	>sp|O75146|HIP1R_HUMAN Huntingtin-interacting protein 1-related protein OS=Homo sapiens GN=HIP1R PE=1 SV=2	HIP1R	119388.31	O75146	O75146	9	0
15.3505	15.3284	15.1569	15.2543	15.2487	15.1313	15.0421	15.1115	15.034	14.4861	14.471	14.9619	14.6159	14.8965	14.5536	14.88	14.5947	14.4566	Homo sapiens	282	>sp|O75153|CLU_HUMAN Clustered mitochondria protein homolog OS=Homo sapiens GN=CLUH PE=1 SV=2	CLUH	146669.81	O75153	O75153	26	0
7.13051	8.88669	9.48304	7.18704	11.6535	7.38878	8.03856	6.71254	6.7629	10.1803	8.09293	10.947	9.54118	9.60354	9.84495	8.66422	8.66346	6.58088	Homo sapiens	283	>sp|O75157|T22D2_HUMAN TSC22 domain family protein 2 OS=Homo sapiens GN=TSC22D2 PE=1 SV=3;>sp|Q15714|T22D1_HUMAN TSC22 domain family protein 1 OS=Homo sapiens GN=TSC22D1 PE=1 SV=3	TSC22D2;TSC22D1	79228.22;109676.56	O75157;Q15714	O75157;Q15714	1	0.001609788
10.8593	11.1524	11.1743	11.2204	11.6141	10.8256	11.3662	11.6227	11.6453	10.3247	9.96266	9.74333	10.4949	11.1052	10.8485	10.4165	9.91645	10.5184	Homo sapiens	284	>sp|O75165|DJC13_HUMAN DnaJ homolog subfamily C member 13 OS=Homo sapiens GN=DNAJC13 PE=1 SV=5	DNAJC13	254414.88	O75165	O75165	10	0
10.9161	10.5288	12.1014	10.6086	10.4948	10.9674	11.6951	11.1315	11.4391	9.24445	9.46328	8.01386	9.44106	9.38961	11.1039	8.92345	10.3864	9.30638	Homo sapiens	285	>sp|O75170|PP6R2_HUMAN Serine/threonine-protein phosphatase 6 regulatory subunit 2 OS=Homo sapiens GN=PPP6R2 PE=1 SV=2	PPP6R2	104941.75	O75170	O75170	2	0
11.6203	5.10353	9.04779	12.1392	10.2235	10.3889	11.151	10.2058	9.90867	8.94034	7.29833	8.77885	8.79321	6.13413	8.6328	10.3994	8.47887	7.61048	Homo sapiens	286	>sp|O75179|ANR17_HUMAN Ankyrin repeat domain-containing protein 17 OS=Homo sapiens GN=ANKRD17 PE=1 SV=3	ANKRD17	274257.91	O75179	O75179	2	0
13.9608	14.143	13.7566	14.3484	14.0484	13.9689	13.9069	13.7867	13.8901	11.8652	12.4617	12.5647	12.9229	13.148	13.1395	14.2392	14.0458	13.6372	Homo sapiens	287	>sp|O75190|DNJB6_HUMAN DnaJ homolog subfamily B member 6 OS=Homo sapiens GN=DNAJB6 PE=1 SV=2;>sp|Q8NHS0|DNJB8_HUMAN DnaJ homolog subfamily B member 8 OS=Homo sapiens GN=DNAJB8 PE=1 SV=1	DNAJB6;DNAJB8	36086.99;25686.35	O75190;Q8NHS0	O75190;Q8NHS0	1	0
9.56857	8.90508	7.6817	6.51845	7.72219	8.77356	9.63554	7.68932	7.77825	8.34378	8.73921	8.39047	9.88268	9.05847	8.8926	9.38162	8.79005	9.81483	Homo sapiens	288	>sp|O75191|XYLB_HUMAN Xylulose kinase OS=Homo sapiens GN=XYLB PE=1 SV=3	XYLB	58382.17	O75191	O75191	1	0
11.2105	11.01	11.6098	10.2446	11.411	11.0576	7.58885	11.5521	10.4331	13.3881	13.5621	12.9181	12.3921	10.9271	12.4963	11.7209	11.6064	11.3839	Homo sapiens	289	>sp|O75208|COQ9_HUMAN Ubiquinone biosynthesis protein COQ9, mitochondrial OS=Homo sapiens GN=COQ9 PE=1 SV=1	COQ9	35508.99	O75208	O75208	3	0.000674992
11.4781	11.7991	12.2949	11.9765	11.4866	11.7941	11.3089	10.4626	11.0992	11.9356	11.1217	12.4272	12.391	12.6252	12.2071	12.838	11.501	11.5719	Homo sapiens	290	>sp|O75312|ZPR1_HUMAN Zinc finger protein ZPR1 OS=Homo sapiens GN=ZPR1 PE=1 SV=1	ZPR1	50925.27	O75312	O75312	4	0
12.3343	12.7074	12.4574	12.4645	11.6326	12.5695	11.2526	11.9771	12.6489	12.0843	11.9837	12.474	10.3672	10.3126	10.1574	9.76949	9.85357	9.55406	Homo sapiens	291	>sp|O75323|NIPS2_HUMAN Protein NipSnap homolog 2 OS=Homo sapiens GN=GBAS PE=1 SV=1	GBAS	33742.64	O75323	O75323	3	0.00254696
16.3751	8.55176	16.4217	16.4354	16.2769	15.9785	16.2313	16.1279	7.68945	6.82237	16.0388	14.3426	16.1361	16.1463	14.5577	16.0203	15.5399	14.4515	Homo sapiens	292	>sp|O75339|CILP1_HUMAN Cartilage intermediate layer protein 1 OS=Homo sapiens GN=CILP PE=1 SV=4	CILP	132564.71	O75339	O75339	1	0.001609788
12.7349	12.7175	12.9483	12.8016	13.012	12.8163	12.2546	13.3834	12.2536	12.3107	13.0365	11.5661	13.1728	13.8073	13.6236	12.3437	11.8824	13.0871	Homo sapiens	293	>sp|O75340|PDCD6_HUMAN Programmed cell death protein 6 OS=Homo sapiens GN=PDCD6 PE=1 SV=1	PDCD6	21868.48	O75340	O75340	2	0
13.2202	12.5545	13.1541	13.299	13.0699	13.1655	13.5361	13.4594	12.9637	14.1805	14.0415	13.8483	14.5324	13.4022	14.1649	14.3375	14.0795	14.2736	Homo sapiens	294	>sp|O75347|TBCA_HUMAN Tubulin-specific chaperone A OS=Homo sapiens GN=TBCA PE=1 SV=3	TBCA	12854.82	O75347	O75347	6	0
9.24209	9.5228	10.0217	10.9306	8.50169	9.8883	10.3308	6.4855	9.53429	10.9667	11.0002	10.3316	12.3747	12.5886	12.4032	11.9989	11.289	12.3743	Homo sapiens	295	>sp|O75348|VATG1_HUMAN V-type proton ATPase subunit G 1 OS=Homo sapiens GN=ATP6V1G1 PE=1 SV=3	ATP6V1G1	13757.51	O75348	O75348	2	0
12.3899	12.6424	12.6353	12.6301	12.5518	13.0519	12.8441	12.9041	13.1975	13.0366	13.2767	13.1711	13.1442	13.3859	13.5169	13.7301	14.2032	13.7002	Homo sapiens	296	>sp|O75351|VPS4B_HUMAN Vacuolar protein sorting-associated protein 4B OS=Homo sapiens GN=VPS4B PE=1 SV=2	VPS4B	49302.07	O75351	O75351	9	0
10.9902	10.319	11.8541	11.6567	11.5815	11.218	11.6865	10.8292	11.2069	12.9633	13.1879	12.1831	11.943	12.4959	12.5129	12.1757	11.7268	12.5503	Homo sapiens	297	>sp|O75352|MPU1_HUMAN Mannose-P-dolichol utilization defect 1 protein OS=Homo sapiens GN=MPDU1 PE=1 SV=2	MPDU1	26637.83	O75352	O75352	3	0
6.78118	8.79292	9.94205	5.66592	7.47889	10.3878	6.10275	9.28355	8.81372	10.6995	11.0835	7.94705	12.2789	11.6317	11.8141	7.81071	7.06365	10.5229	Homo sapiens	298	>sp|O75367|H2AY_HUMAN Core histone macro-H2A.1 OS=Homo sapiens GN=H2AFY PE=1 SV=4	H2AFY	39617.05	O75367	O75367	4	0
12.6024	12.1936	12.3595	12.592	12.6625	12.8215	13.0276	12.5545	12.6176	13.8306	14.195	13.5555	13.5438	12.8493	13.123	12.8912	12.9328	13.4428	Homo sapiens	299	>sp|O75368|SH3L1_HUMAN SH3 domain-binding glutamic acid-rich-like protein OS=Homo sapiens GN=SH3BGRL PE=1 SV=1	SH3BGRL	12774.25	O75368	O75368	6	0
17.8509	17.9517	18.1911	17.807	17.8513	18.0645	17.9463	18.0661	17.7208	19.0904	19.5076	19.3779	19.4431	19.0384	19.1867	18.5536	18.5817	18.5428	Homo sapiens	300	>sp|O75369|FLNB_HUMAN Filamin-B OS=Homo sapiens GN=FLNB PE=1 SV=2	FLNB	278164.03	O75369	O75369	74	0
12.1273	12.0409	12.1254	12.6564	12.8305	12.3803	12.7541	12.721	13.194	12.6629	12.724	13.1535	13.6306	13.9967	13.0949	12.7376	12.7937	13.0244	Homo sapiens	301	>sp|O75381|PEX14_HUMAN Peroxisomal membrane protein PEX14 OS=Homo sapiens GN=PEX14 PE=1 SV=1	PEX14	41236.61	O75381	O75381	1	0
15.9408	16.0647	16.1586	15.9971	16.3859	16.565	16.4594	16.3925	16.248	16.8746	17.2061	16.9466	16.7931	16.5726	16.6768	16.8376	17.1182	17.0778	Homo sapiens	302	>sp|O75390|CISY_HUMAN Citrate synthase, mitochondrial OS=Homo sapiens GN=CS PE=1 SV=2	CS	51712.43	O75390	O75390	20	0
14.2339	14.5238	14.4153	14.4755	14.6674	14.5835	14.2658	14.6212	14.6174	13.8675	13.6868	13.8212	14.2053	14.2564	14.0949	13.9386	14.2475	14.1849	Homo sapiens	303	>sp|O75396|SC22B_HUMAN Vesicle-trafficking protein SEC22b OS=Homo sapiens GN=SEC22B PE=1 SV=4	SEC22B	24593.32	O75396	O75396	9	0
12.0646	12.3436	12.2746	12.5301	11.9338	11.9647	11.7001	11.9158	11.7405	11.0504	11.3102	10.7279	10.9992	11.5947	12.2132	10.9109	10.9281	10.4556	Homo sapiens	304	>sp|O75400|PR40A_HUMAN Pre-mRNA-processing factor 40 homolog A OS=Homo sapiens GN=PRPF40A PE=1 SV=2	PRPF40A	108804.96	O75400	O75400	12	0
15.6116	15.971	15.5403	16.0087	15.6869	15.694	15.5538	15.8293	16.0372	15.1585	15.4213	14.6231	15.4187	15.8783	15.658	15.1363	14.7671	15.609	Homo sapiens	305	>sp|O75436|VP26A_HUMAN Vacuolar protein sorting-associated protein 26A OS=Homo sapiens GN=VPS26A PE=1 SV=2	VPS26A	38169.91	O75436	O75436	8	0
13.0771	12.5681	12.7655	13.023	12.9198	13.0069	12.6009	12.7287	12.8736	12.3818	11.9028	11.5705	12.1978	12.1657	11.6641	11.9785	11.7907	12.974	Homo sapiens	306	>sp|O75439|MPPB_HUMAN Mitochondrial-processing peptidase subunit beta OS=Homo sapiens GN=PMPCB PE=1 SV=2	PMPCB	54366.14	O75439	O75439	8	0
14.3612	14.6691	14.783	14.3649	13.9976	14.8799	14.0337	14.5425	14.1749	15.1099	15.3215	15.4685	15.0595	15.2406	15.0474	14.6854	14.7207	14.5529	Homo sapiens	307	>sp|O75475|PSIP1_HUMAN PC4 and SFRS1-interacting protein OS=Homo sapiens GN=PSIP1 PE=1 SV=1	PSIP1	60103.24	O75475	O75475	20	0
14.2303	14.5889	14.4519	14.7491	14.8999	14.7786	14.8351	15.0557	14.8865	13.1706	11.7252	13.1409	15.0541	14.9817	14.9336	15.4128	15.094	14.6446	Homo sapiens	308	>sp|O75487|GPC4_HUMAN Glypican-4 OS=Homo sapiens GN=GPC4 PE=1 SV=4	GPC4	62412.1	O75487	O75487	12	0
10.1075	11.0684	11.2255	10.7726	11.1121	10.7886	10.6915	10.8453	10.1506	10.075	9.98932	10.5713	10.4828	10.9182	10.4763	10.8578	11.2296	10.7286	Homo sapiens	309	>sp|O75489|NDUS3_HUMAN NADH dehydrogenase [ubiquinone] iron-sulfur protein 3, mitochondrial OS=Homo sapiens GN=NDUFS3 PE=1 SV=1	NDUFS3	30241.53	O75489	O75489	4	0.000342818
6.65069	8.11771	8.29091	8.14373	7.80104	7.74679	8.26334	8.33668	8.48176	9.63933	8.70355	8.72003	8.21644	8.63367	7.90449	7.40037	6.93457	8.13944	Homo sapiens	310	>sp|O75494|SRS10_HUMAN Serine/arginine-rich splicing factor 10 OS=Homo sapiens GN=SRSF10 PE=1 SV=1	SRSF10	31300.54	O75494	O75494	2	0.001318392
10.2338	8.22237	8.48649	10.3819	9.25499	8.22174	8.04707	8.8257	8.26385	9.62379	10.0648	10.4602	9.94078	10.5263	9.85592	9.67136	7.7808	8.48777	Homo sapiens	311	>sp|O75530|EED_HUMAN Polycomb protein EED OS=Homo sapiens GN=EED PE=1 SV=2	EED	50197.69	O75530	O75530	1	0.001609788
12.7144	12.7367	12.8894	12.8994	12.736	12.6769	12.7081	12.6137	11.9645	11.7963	12.8092	12.0528	13.1822	13.4606	12.4523	10.9781	12.2007	12.7085	Homo sapiens	312	>sp|O75531|BAF_HUMAN Barrier-to-autointegration factor OS=Homo sapiens GN=BANF1 PE=1 SV=1	BANF1	10058.57	O75531	O75531	3	0
14.3465	14.4814	14.1797	14.5584	14.4644	14.1195	14.2363	14.3486	14.4666	12.9652	12.9742	13.6315	13.2595	13.4116	13.3513	13.4335	13.2527	12.6656	Homo sapiens	313	>sp|O75533|SF3B1_HUMAN Splicing factor 3B subunit 1 OS=Homo sapiens GN=SF3B1 PE=1 SV=3	SF3B1	145830.36	O75533	O75533	39	0
14.3847	14.2908	14.2191	14.4985	14.1636	14.1563	14.1647	14.0982	14.4652	14.2231	14.5378	14.8476	14.9342	14.8356	14.2854	14.8318	14.8127	14.9545	Homo sapiens	314	>sp|O75534|CSDE1_HUMAN Cold shock domain-containing protein E1 OS=Homo sapiens GN=CSDE1 PE=1 SV=2	CSDE1	88884.66	O75534	O75534	20	0
11.0639	11.1506	11.42	11.275	10.9937	11.3083	10.9483	11.1654	10.9593	12.5175	12.3912	11.994	12.123	11.981	12.1876	11.7797	11.7558	12.0925	Homo sapiens	315	>sp|O75607|NPM3_HUMAN Nucleoplasmin-3 OS=Homo sapiens GN=NPM3 PE=1 SV=3	NPM3	19343.68	O75607	O75607	4	0
9.97371	7.38299	9.09499	9.96791	9.9537	9.94317	9.91445	10.4896	8.61491	10.1361	10.2632	9.42963	10.2058	10.1671	9.72595	10.1497	9.72316	11.167	Homo sapiens	316	>sp|O75616|ERAL1_HUMAN GTPase Era, mitochondrial OS=Homo sapiens GN=ERAL1 PE=1 SV=2	ERAL1	48350.05	O75616	O75616	4	0
9.72254	9.67082	10.4989	10.3653	9.88221	11.7679	9.49198	11.0741	9.42371	7.62681	9.04948	10.25	8.73291	10.7136	7.15649	8.21145	8.79504	9.1581	Homo sapiens	317	>sp|O75629|CREG1_HUMAN Protein CREG1 OS=Homo sapiens GN=CREG1 PE=1 SV=1	CREG1	24074.53	O75629	O75629	1	0
15.6954	15.9074	15.8157	15.7696	15.5728	15.3962	15.3706	15.3756	15.6179	14.4902	14.1443	14.125	14.406	14.9107	14.8226	14.3487	14.158	14.2814	Homo sapiens	318	>sp|O75643|U520_HUMAN U5 small nuclear ribonucleoprotein 200 kDa helicase OS=Homo sapiens GN=SNRNP200 PE=1 SV=2	SNRNP200	244507.6	O75643	O75643	48	0
12.6751	12.5423	12.2224	12.8117	12.4351	12.2742	11.9641	12.3125	12.4472	12.1765	12.0417	12.5197	12.1232	12.0527	11.9258	11.9577	11.9015	11.6812	Homo sapiens	319	>sp|O75663|TIPRL_HUMAN TIP41-like protein OS=Homo sapiens GN=TIPRL PE=1 SV=2	TIPRL	31443.96	O75663	O75663	4	0
8.91579	8.60965	7.86173	10.5256	10.1843	9.29893	9.98345	9.81667	9.4722	10.0139	7.77118	10.1431	11.1061	10.9307	10.4777	10.7294	10.8105	10.0601	Homo sapiens	320	>sp|O75674|TM1L1_HUMAN TOM1-like protein 1 OS=Homo sapiens GN=TOM1L1 PE=1 SV=2	TOM1L1	52988.84	O75674	O75674	2	0
8.27027	7.93546	7.26229	10.5052	6.34963	7.87829	9.68476	8.72215	10.2495	7.70439	6.82719	7.60098	8.14865	8.71397	8.84599	7.56294	7.8954	6.9793	Homo sapiens	321	>sp|O75676|KS6A4_HUMAN Ribosomal protein S6 kinase alpha-4 OS=Homo sapiens GN=RPS6KA4 PE=1 SV=1	RPS6KA4	85605.78	O75676	O75676	1	0.000674992
12.8305	12.9916	13.4372	12.9323	13.3387	13.4961	13.4025	13.1897	12.1244	13.8713	14.3378	14.4626	14.4712	13.8099	14.336	13.7552	14.0331	13.3407	Homo sapiens	322	>sp|O75688|PPM1B_HUMAN Protein phosphatase 1B OS=Homo sapiens GN=PPM1B PE=1 SV=1	PPM1B	52642.58	O75688	O75688	10	0
14.3301	14.3207	14.6173	14.4802	14.3259	14.5333	14.4323	14.388	14.3283	14.2912	14.3468	14.5644	14.0923	14.5144	14.1751	14.222	14.0374	14.0125	Homo sapiens	323	>sp|O75694|NU155_HUMAN Nuclear pore complex protein Nup155 OS=Homo sapiens GN=NUP155 PE=1 SV=1	NUP155	155199.15	O75694	O75694	14	0
12.3004	12.0384	12.1551	13.4025	12.7751	12.0392	11.9289	12.3379	11.1501	10.6865	11.288	11.9568	12.0802	11.5403	13.3289	12.0722	11.78	9.43794	Homo sapiens	324	>sp|O75717|WDHD1_HUMAN WD repeat and HMG-box DNA-binding protein 1 OS=Homo sapiens GN=WDHD1 PE=1 SV=1	WDHD1	125967.35	O75717	O75717	4	0
11.6525	11.5175	10.5281	11.8427	11.0925	9.64278	11.2292	11.3005	9.28875	10.7177	10.4602	11.1598	11.9248	12.2548	11.8247	11.0473	10.3759	10.4059	Homo sapiens	325	>sp|O75718|CRTAP_HUMAN Cartilage-associated protein OS=Homo sapiens GN=CRTAP PE=1 SV=1	CRTAP	46561.87	O75718	O75718	4	0
11.6644	11.0676	11.7031	12.0957	11.7942	11.4228	11.9131	11.9526	11.4236	10.7393	11.49	11.7193	12.2809	12.3041	11.8099	12.2408	12.5516	12.2742	Homo sapiens	326	>sp|O75787|RENR_HUMAN Renin receptor OS=Homo sapiens GN=ATP6AP2 PE=1 SV=2	ATP6AP2	39008.01	O75787	O75787	5	0
15.7399	15.7927	15.7985	15.7743	15.9377	16.0192	15.9585	15.9099	15.9281	15.5094	15.7292	15.9962	15.8555	16.0925	15.7956	16.4157	16.3338	16.1763	Homo sapiens	327	>sp|O75821|EIF3G_HUMAN Eukaryotic translation initiation factor 3 subunit G OS=Homo sapiens GN=EIF3G PE=1 SV=2	EIF3G	35611.01	O75821	O75821	20	0
13.8577	14.0379	14.036	14.0991	14.0717	14.1895	14.2575	14.1177	14.1544	12.9476	13.7456	14.2819	14.6239	14.3531	14.1077	14.9719	15.1006	14.4817	Homo sapiens	328	>sp|O75822|EIF3J_HUMAN Eukaryotic translation initiation factor 3 subunit J OS=Homo sapiens GN=EIF3J PE=1 SV=2	EIF3J	29062.4	O75822	O75822	10	0
14.5725	14.8823	13.5231	14.8518	15.2992	14.8354	14.5965	14.2104	14.9415	14.4945	14.5297	14.2304	14.6346	15.6653	15.2181	14.3077	15.1428	14.9389	Homo sapiens	329	>sp|O75832|PSD10_HUMAN 26S proteasome non-ATPase regulatory subunit 10 OS=Homo sapiens GN=PSMD10 PE=1 SV=1	PSMD10	24427.83	O75832	O75832	2	0.000674992
12.0118	10.3394	11.0438	11.0609	6.63926	11.5366	11.8298	9.25472	9.88334	12.6528	11.8265	12.0164	12.2393	10.823	12.1123	12.3957	11.3458	11.5129	Homo sapiens	330	>sp|O75844|FACE1_HUMAN CAAX prenyl protease 1 homolog OS=Homo sapiens GN=ZMPSTE24 PE=1 SV=2	ZMPSTE24	54812.9	O75844	O75844	5	0
17.3266	17.1805	17.2659	17.6653	18.103	17.6821	17.6367	17.6297	18.1932	17.3295	17.0186	16.813	17.8903	18.1421	18.457	17.741	17.6569	17.6192	Homo sapiens	331	>sp|O75874|IDHC_HUMAN Isocitrate dehydrogenase [NADP] cytoplasmic OS=Homo sapiens GN=IDH1 PE=1 SV=2	IDH1	46659.29	O75874	O75874	12	0
13.5181	13.9969	14.1578	13.5151	13.8502	13.453	13.551	13.8364	13.6258	14.7361	15.2468	14.589	14.2927	14.3697	14.5173	14.2155	14.5668	14.6075	Homo sapiens	332	>sp|O75880|SCO1_HUMAN Protein SCO1 homolog, mitochondrial OS=Homo sapiens GN=SCO1 PE=1 SV=1	SCO1	33813.98	O75880	O75880	3	0
6.49038	8.35353	6.73195	8.22903	8.78684	8.39054	7.97245	7.28151	7.4246	8.88246	8.27869	6.96707	9.68423	7.0878	7.23097	7.08399	7.70611	10.1636	Homo sapiens	333	>sp|O75882|ATRN_HUMAN Attractin OS=Homo sapiens GN=ATRN PE=1 SV=2	ATRN	158536.87	O75882	O75882	1	0
5.23619	7.50214	8.09072	4.77318	8.21443	7.79482	5.80275	8.56221	10.1247	7.95014	7.57338	6.04432	7.65299	8.53046	9.48304	7.30913	6.40443	7.1829	Homo sapiens	334	>sp|O75884|RBBP9_HUMAN Putative hydrolase RBBP9 OS=Homo sapiens GN=RBBP9 PE=1 SV=2	RBBP9	20999.92	O75884	O75884	1	0
11.937	11.7208	11.3408	11.7774	11.6334	11.4192	11.7074	11.4094	11.4243	10.1969	10.489	11.5073	10.8733	10.1243	11.2484	11.0072	10.3008	8.74	Homo sapiens	335	>sp|O75886|STAM2_HUMAN Signal transducing adapter molecule 2 OS=Homo sapiens GN=STAM2 PE=1 SV=1	STAM2	58164.24	O75886	O75886	1	0
13.354	14.2085	13.1805	13.2404	13.9388	13.9033	13.4799	13.9383	13.8073	9.77503	13.7766	12.9386	10.264	10.7007	12.4624	15.4749	15.8296	12.5094	Homo sapiens	336	>sp|O75909|CCNK_HUMAN Cyclin-K OS=Homo sapiens GN=CCNK PE=1 SV=2	CCNK	64239.76	O75909	O75909	1	0.001609788
14.4354	14.5253	14.3815	14.501	14.7075	14.8887	14.7143	14.7406	14.4281	14.9473	15.1347	14.7936	14.9397	15.137	14.9774	14.9441	15.1189	15.3398	Homo sapiens	337	>sp|O75915|PRAF3_HUMAN PRA1 family protein 3 OS=Homo sapiens GN=ARL6IP5 PE=1 SV=1	ARL6IP5	21614.7	O75915	O75915	6	0
11.8209	11.2902	11.8966	10.9267	11.9295	12.0295	11.892	12.0009	11.5821	12.8248	12.9145	12.1893	11.8682	11.7502	12.3784	12.3895	12.1222	12.367	Homo sapiens	338	>sp|O75935|DCTN3_HUMAN Dynactin subunit 3 OS=Homo sapiens GN=DCTN3 PE=1 SV=1	DCTN3	21119.41	O75935	O75935	6	0
13.7388	14.0774	14.0332	14.0166	14.222	14.2244	13.8141	14.0859	13.6644	14.9857	15.5625	15.1253	15.4251	14.9819	15.1622	14.9905	15.3894	15.38	Homo sapiens	339	>sp|O75937|DNJC8_HUMAN DnaJ homolog subfamily C member 8 OS=Homo sapiens GN=DNAJC8 PE=1 SV=2	DNAJC8	29841.65	O75937	O75937	12	0
14.404	14.532	14.8757	14.4848	14.1337	14.1392	14.2248	14.3879	13.9593	14.9338	15.0529	14.8364	14.3688	14.4242	14.4893	14.3448	14.4888	14.481	Homo sapiens	340	>sp|O75947|ATP5H_HUMAN ATP synthase subunit d, mitochondrial OS=Homo sapiens GN=ATP5H PE=1 SV=3	ATP5H	18491.21	O75947	O75947	7	0
10.4128	10.812	10.7606	11.4923	11.7526	12.2536	12.2107	11.7807	11.28	11.0759	10.8391	12.8744	12.7895	12.7236	13.8662	11.8411	11.4265	8.6072	Homo sapiens	341	>sp|O75955|FLOT1_HUMAN Flotillin-1 OS=Homo sapiens GN=FLOT1 PE=1 SV=3	FLOT1	47355.28	O75955	O75955	5	0
14.5521	14.3873	14.2377	14.6856	13.8911	14.2294	14.1145	14.2437	12.1185	14.9177	14.723	14.5346	14.5113	14.681	14.4793	14.4375	14.3158	14.7792	Homo sapiens	342	>sp|O75964|ATP5L_HUMAN ATP synthase subunit g, mitochondrial OS=Homo sapiens GN=ATP5L PE=1 SV=3	ATP5L	11428.47	O75964	O75964	5	0
9.93572	9.4463	10.982	11.4182	11.2297	10.9915	11.2511	11.713	10.6372	10.119	11.6112	10.8421	12.5926	12.6631	12.6332	12.5319	12.6119	12.5895	Homo sapiens	343	>sp|O75976|CBPD_HUMAN Carboxypeptidase D OS=Homo sapiens GN=CPD PE=1 SV=2	CPD	152931.05	O75976	O75976	8	0
14.85	15.1791	15.311	15.1847	15.3492	15.4559	15.4255	15.2414	15.2074	15.2437	15.8704	15.7699	15.8774	15.4886	15.6465	16.0084	16.1085	15.8821	Homo sapiens	344	>sp|O76003|GLRX3_HUMAN Glutaredoxin-3 OS=Homo sapiens GN=GLRX3 PE=1 SV=2	GLRX3	37432.03	O76003	O76003	14	0
14.0895	14.2228	14.0122	14.0238	13.9176	13.8075	13.5307	13.8408	13.7905	11.9678	11.9985	9.43009	11.6878	12.2771	13.9317	10.1754	9.61	10.4964	Homo sapiens	345	>sp|O76021|RL1D1_HUMAN Ribosomal L1 domain-containing protein 1 OS=Homo sapiens GN=RSL1D1 PE=1 SV=3	RSL1D1	54972.52	O76021	O76021	17	0
11.119	11.2495	11.1963	11.1432	10.5188	11.334	11.2708	10.5224	11.3759	11.0696	11.5167	9.80414	12.0453	11.3846	11.9842	11.0801	10.9769	12.2482	Homo sapiens	346	>sp|O76024|WFS1_HUMAN Wolframin OS=Homo sapiens GN=WFS1 PE=1 SV=2	WFS1	100291.5	O76024	O76024	3	0
8.82879	14.0837	7.83109	7.99314	11.6532	13.4466	13.4991	13.8103	14.0778	9.36596	15.4319	12.243	14.5319	15.4567	11.5354	8.6186	8.91423	12.3812	Homo sapiens	347	>sp|O76027|ANXA9_HUMAN Annexin A9 OS=Homo sapiens GN=ANXA9 PE=1 SV=3	ANXA9	38363.56	O76027	O76027	1	0.005063291
12.9674	12.0738	12.5013	12.6655	12.4659	11.824	12.5011	12.1417	12.1771	12.3138	11.2374	11.7248	12.5178	12.2604	11.9483	11.5815	11.2233	11.894	Homo sapiens	348	>sp|O76031|CLPX_HUMAN ATP-dependent Clp protease ATP-binding subunit clpX-like, mitochondrial OS=Homo sapiens GN=CLPX PE=1 SV=2	CLPX	69223.74	O76031	O76031	10	0
13.7318	13.979	13.9996	13.5693	13.7948	13.563	13.2889	13.7347	13.9877	13.1129	12.708	11.8299	12.3392	13.0528	13.3733	12.5952	12.8672	13.1344	Homo sapiens	349	>sp|O76071|CIAO1_HUMAN Probable cytosolic iron-sulfur protein assembly protein CIAO1 OS=Homo sapiens GN=CIAO1 PE=1 SV=1	CIAO1	37840.01	O76071	O76071	3	0
13.2648	13.0134	12.8814	13.4402	12.7404	12.6757	13.0538	12.4977	12.7609	12.1215	11.7509	11.0579	11.5985	11.7652	12.5895	11.5293	11.3563	11.4135	Homo sapiens	350	>sp|O76094|SRP72_HUMAN Signal recognition particle subunit SRP72 OS=Homo sapiens GN=SRP72 PE=1 SV=3	SRP72	74606.19	O76094	O76094	11	0
14.2733	14.6638	14.6154	14.5897	14.9085	14.7771	14.5859	14.4316	14.8071	13.9033	14.1974	14.1623	14.4198	14.6919	14.6633	13.8696	14.0935	13.7622	Homo sapiens	351	>sp|O94760|DDAH1_HUMAN N(G),N(G)-dimethylarginine dimethylaminohydrolase 1 OS=Homo sapiens GN=DDAH1 PE=1 SV=3	DDAH1	31121.77	O94760	O94760	4	0
15.6287	15.9178	15.2399	15.9996	15.8661	15.3706	15.4277	15.6155	15.7534	14.4297	13.6614	14.652	15.0823	15.5105	14.6915	14.6853	14.6354	14.6589	Homo sapiens	352	>sp|O94762|RECQ5_HUMAN ATP-dependent DNA helicase Q5 OS=Homo sapiens GN=RECQL5 PE=1 SV=2	RECQL5	108858.36	O94762	O94762	2	0.000342818
12.7593	12.3802	12.4634	13.3277	12.175	13.0574	11.7299	12.4214	11.4973	11.5763	11.4434	13.0638	12.1874	12.2362	13.3203	11.8392	11.3112	8.9128	Homo sapiens	353	>sp|O94776|MTA2_HUMAN Metastasis-associated protein MTA2 OS=Homo sapiens GN=MTA2 PE=1 SV=1	MTA2	75023.09	O94776	O94776	8	0
12.4069	12.4125	11.8774	12.4429	12.4092	11.6581	12.0704	12.0953	12.1493	11.2061	11.2515	10.5017	10.8463	11.3366	11.0979	10.9838	10.8743	11.6497	Homo sapiens	354	>sp|O94804|STK10_HUMAN Serine/threonine-protein kinase 10 OS=Homo sapiens GN=STK10 PE=1 SV=1	STK10	112135.23	O94804	O94804	4	0
12.6025	12.604	12.1656	12.4572	12.5257	12.5991	12.2787	12.2451	12.1518	12.6078	11.938	13.5084	12.3736	13.1097	11.9485	12.6066	12.3574	12.0398	Homo sapiens	355	>sp|O94817|ATG12_HUMAN Ubiquitin-like protein ATG12 OS=Homo sapiens GN=ATG12 PE=1 SV=1	ATG12	15113.25	O94817	O94817	2	0.000342818
13.6668	13.7675	13.917	13.9459	13.9965	13.9206	13.3749	13.5226	14.064	12.5648	12.7597	12.5958	12.7865	13.5212	12.4942	13.0364	12.9746	13.7316	Homo sapiens	356	>sp|O94822|LTN1_HUMAN E3 ubiquitin-protein ligase listerin OS=Homo sapiens GN=LTN1 PE=1 SV=6	LTN1	200552.01	O94822	O94822	11	0
13.8982	14.183	14.3913	13.5426	13.6091	13.3161	13.5383	12.712	13.3457	14.9492	15.34	14.6963	14.6453	14.6173	14.4408	14.1872	14.2448	14.8548	Homo sapiens	357	>sp|O94826|TOM70_HUMAN Mitochondrial import receptor subunit TOM70 OS=Homo sapiens GN=TOMM70A PE=1 SV=1	TOMM70A	67454.81	O94826	O94826	13	0
12.0065	11.5649	11.3093	12.3268	11.1747	10.9428	12.4668	10.8536	11.4786	10.3387	8.62244	9.98616	10.0527	10.5586	10.9631	10.2061	9.84716	8.86354	Homo sapiens	358	>sp|O94855|SC24D_HUMAN Protein transport protein Sec24D OS=Homo sapiens GN=SEC24D PE=1 SV=2	SEC24D	113009.7	O94855	O94855	4	0
7.50039	7.4979	8.52469	7.41659	6.58587	9.22648	8.17542	6.53752	8.80885	7.25166	7.26246	7.12422	8.68464	10.6436	9.01307	8.31618	7.18834	8.53615	Homo sapiens	359	>sp|O94874|UFL1_HUMAN E3 UFM1-protein ligase 1 OS=Homo sapiens GN=UFL1 PE=1 SV=2	UFL1	89595.27	O94874	O94874	1	0
10.589	9.56831	7.7042	10.7901	10.2652	9.87224	11.4434	9.55281	11.1827	11.3934	9.36241	11.9165	12.2926	11.7074	11.6885	13.1451	13.134	11.9124	Homo sapiens	360	>sp|O94888|UBXN7_HUMAN UBX domain-containing protein 7 OS=Homo sapiens GN=UBXN7 PE=1 SV=2	UBXN7	54862.33	O94888	O94888	3	0
9.86774	10.7188	11.2908	11.6482	11.5344	11.8003	11.6399	11.7934	12.0082	12.1631	13.1417	12.5232	12.7133	12.2215	12.7846	12.9307	12.9068	12.7307	Homo sapiens	361	>sp|O94903|PROSC_HUMAN Proline synthase co-transcribed bacterial homolog protein OS=Homo sapiens GN=PROSC PE=1 SV=1	PROSC	30343.9	O94903	O94903	5	0
11.9925	11.9978	12.0043	11.7985	11.6295	11.9977	11.8377	11.9418	12.3728	11.9969	11.2019	11.9842	12.5378	13.305	11.3328	11.1012	10.7419	12.1253	Homo sapiens	362	>sp|O94905|ERLN2_HUMAN Erlin-2 OS=Homo sapiens GN=ERLIN2 PE=1 SV=1	ERLIN2	37839.54	O94905	O94905	4	0.000342818
14.3209	14.6888	14.5785	14.4657	14.4941	14.237	13.6722	14.1243	14.429	13.6132	13.219	12.2339	12.8769	13.4076	13.2097	12.9481	13.0453	14.1114	Homo sapiens	363	>sp|O94906|PRP6_HUMAN Pre-mRNA-processing factor 6 OS=Homo sapiens GN=PRPF6 PE=1 SV=1	PRPF6	106924.94	O94906	O94906	18	0
9.84165	9.47772	7.46026	10.5081	10.33	9.26164	10.7308	9.91838	8.64249	6.98214	7.88971	9.64069	10.2523	9.28815	9.45582	10.0673	8.8762	7.58138	Homo sapiens	364	>sp|O94913|PCF11_HUMAN Pre-mRNA cleavage complex 2 protein Pcf11 OS=Homo sapiens GN=PCF11 PE=1 SV=3	PCF11	173050.18	O94913	O94913	3	0
15.0059	15.1829	15.1994	15.1145	15.3255	15.1625	15.105	15.1354	15.1774	15.1395	15.0162	14.5612	14.7576	15.0827	15.235	15.0495	15.0937	15.2734	Homo sapiens	365	>sp|O94925|GLSK_HUMAN Glutaminase kidney isoform, mitochondrial OS=Homo sapiens GN=GLS PE=1 SV=1	GLS	73461.1	O94925	O94925	15	0
13.2306	13.2371	13.4309	13.247	13.4325	12.7364	13.3457	13.1702	13.0032	12.4238	12.1774	11.6284	12.5684	12.8006	12.8098	12.4697	12.3046	12.934	Homo sapiens	366	>sp|O94973|AP2A2_HUMAN AP-2 complex subunit alpha-2 OS=Homo sapiens GN=AP2A2 PE=1 SV=2	AP2A2	103960.42	O94973	O94973	11	0
15.8403	15.594	15.5244	15.6768	15.9324	15.1881	15.747	15.2867	15.7366	14.7926	14.8185	14.8877	14.5148	15.1022	14.7458	14.7336	14.3618	14.5283	Homo sapiens	367	>sp|O94979|SC31A_HUMAN Protein transport protein Sec31A OS=Homo sapiens GN=SEC31A PE=1 SV=3	SEC31A	133014.69	O94979	O94979	24	0
12.3394	12.4441	12.4735	14.214	14.1868	11.5996	14.3506	12.8601	13.6754	12.971	13.7361	14.3081	14.3356	15.0977	15.0639	16.4844	15.9969	14.9389	Homo sapiens	368	>sp|O94992|HEXI1_HUMAN Protein HEXIM1 OS=Homo sapiens GN=HEXIM1 PE=1 SV=1	HEXIM1	40623.45	O94992	O94992	6	0
12.4205	12.8879	12.2382	13.0461	13.069	12.9254	12.4817	11.6538	12.6231	9.71728	10.9467	8.76191	11.0618	11.5321	13.0905	11.2055	10.9678	10.8632	Homo sapiens	369	>sp|O95071|UBR5_HUMAN E3 ubiquitin-protein ligase UBR5 OS=Homo sapiens GN=UBR5 PE=1 SV=2	UBR5	309352.41	O95071	O95071	6	0
12.6831	12.3564	12.814	12.0092	11.7416	11.2773	11.2817	12.7063	9.63129	8.22646	6.80313	6.90139	7.20081	7.02228	7.80855	7.68489	5.55176	8.10756	Homo sapiens	370	>sp|O95084|PRS23_HUMAN Serine protease 23 OS=Homo sapiens GN=PRSS23 PE=1 SV=1	PRSS23	43001.25	O95084	O95084	3	0
14.1823	14.4495	14.2222	14.3403	14.5823	14.2507	14.4973	14.6065	14.3609	14.6998	14.9163	14.8977	14.5553	14.9391	14.9917	15.1781	15.294	14.902	Homo sapiens	371	>sp|O95104|SFR15_HUMAN Splicing factor, arginine/serine-rich 15 OS=Homo sapiens GN=SCAF4 PE=1 SV=3	SCAF4	125868.53	O95104	O95104	6	0
13.7286	13.7564	14.4259	13.644	13.901	14.3541	13.5826	14.3107	13.3376	14.4954	14.7518	14.9673	14.8823	14.6492	14.7419	14.6037	14.6329	14.2985	Homo sapiens	372	>sp|O95154|ARK73_HUMAN Aflatoxin B1 aldehyde reductase member 3 OS=Homo sapiens GN=AKR7A3 PE=1 SV=2	AKR7A3	37206.39	O95154	O95154	7	0
10.6542	10.7524	10.5166	11.8248	11.581	11.3037	10.9411	10.5666	11.3168	8.53429	8.18104	9.22851	9.42912	9.57456	10.2564	8.98137	8.99578	7.36312	Homo sapiens	373	>sp|O95163|ELP1_HUMAN Elongator complex protein 1 OS=Homo sapiens GN=IKBKAP PE=1 SV=3	IKBKAP	150254.28	O95163	O95163	6	0
15.8377	16.0442	16.0259	15.9097	16.3372	16.3983	16.2228	16.3198	16.2919	16.6073	16.9276	16.6262	16.5445	16.6736	16.6437	16.7048	16.9426	16.9303	Homo sapiens	374	>sp|O95197|RTN3_HUMAN Reticulon-3 OS=Homo sapiens GN=RTN3 PE=1 SV=2	RTN3	112611.04	O95197	O95197	4	0
15.1304	15.204	15.2944	14.9381	15.2412	15.067	15.0103	15.1971	14.8735	15.6497	16.0019	15.7613	15.5197	15.5459	15.5268	15.646	15.4037	15.5953	Homo sapiens	375	>sp|O95202|LETM1_HUMAN LETM1 and EF-hand domain-containing protein 1, mitochondrial OS=Homo sapiens GN=LETM1 PE=1 SV=1	LETM1	83354.16	O95202	O95202	15	0
7.42884	8.73597	8.12726	10.0071	8.98688	7.65146	8.97817	8.50194	7.64969	9.60068	9.53679	8.05098	9.04347	8.06294	9.75955	8.15071	8.00416	8.38884	Homo sapiens	376	>sp|O95210|STBD1_HUMAN Starch-binding domain-containing protein 1 OS=Homo sapiens GN=STBD1 PE=1 SV=1	STBD1	39007.26	O95210	O95210	2	0
14.4675	14.3478	14.0465	14.5131	14.3166	14.0211	14.2339	13.9917	14.3642	13.0292	13.3203	13.0009	13.5856	13.637	13.9267	13.9063	13.5954	13.6092	Homo sapiens	377	>sp|O95232|LC7L3_HUMAN Luc7-like protein 3 OS=Homo sapiens GN=LUC7L3 PE=1 SV=2	LUC7L3	51466.14	O95232	O95232	8	0
7.75693	7.75569	7.58587	8.16152	8.07769	7.24186	9.41	8.60515	8.21354	8.65254	7.73387	7.74858	9.5765	6.65563	7.6637	8.43524	7.14461	8.68691	Homo sapiens	378	>sp|O95239|KIF4A_HUMAN Chromosome-associated kinesin KIF4A OS=Homo sapiens GN=KIF4A PE=1 SV=3;>sp|Q2VIQ3|KIF4B_HUMAN Chromosome-associated kinesin KIF4B OS=Homo sapiens GN=KIF4B PE=2 SV=2	KIF4A;KIF4B	139881.05;140035.18	O95239;Q2VIQ3	O95239;Q2VIQ3	1	0
9.36853	7.36253	8.12614	9.46019	8.60928	8.42506	9.10289	7.87736	8.93706	8.36157	7.31264	9.45603	9.40195	9.10584	7.76408	8.31624	8.96409	8.51106	Homo sapiens	379	>sp|O95260|ATE1_HUMAN Arginyl-tRNA--protein transferase 1 OS=Homo sapiens GN=ATE1 PE=1 SV=2	ATE1	59090.22	O95260	O95260	3	0
16.5904	16.9083	16.7105	16.52	17.006	17.1988	16.3291	17.0388	17.3287	16.9304	17.2459	17.4395	16.7401	17.2679	17.3999	17.6769	18.3026	17.2425	Homo sapiens	380	>sp|O95292|VAPB_HUMAN Vesicle-associated membrane protein-associated protein B/C OS=Homo sapiens GN=VAPB PE=1 SV=3	VAPB	27228.39	O95292	O95292	11	0
9.56724	7.95788	7.18332	11.0006	11.1706	9.58564	11.204	9.70989	9.85797	9.10582	9.96428	9.27335	11.9526	10.6871	11.6393	12.0464	11.083	11.507	Homo sapiens	381	>sp|O95297|MPZL1_HUMAN Myelin protein zero-like protein 1 OS=Homo sapiens GN=MPZL1 PE=1 SV=1	MPZL1	29082.18	O95297	O95297	2	0
6.0497	6.81163	7.00038	7.62094	9.55133	6.10684	7.30932	6.35116	7.4722	7.86723	8.24901	8.10062	5.86915	9.8962	8.20957	9.54232	9.03438	8.91895	Homo sapiens	382	>sp|O95299|NDUAA_HUMAN NADH dehydrogenase [ubiquinone] 1 alpha subcomplex subunit 10, mitochondrial OS=Homo sapiens GN=NDUFA10 PE=1 SV=1	NDUFA10	40750.6	O95299	O95299	1	0.00254696
12.5472	12.7909	13.6732	11.9266	13.4499	13.0603	12.4558	12.7396	11.249	13.9361	14.7654	14.1614	13.8229	13.9283	13.0999	13.2159	13.8992	14.5226	Homo sapiens	383	>sp|O95302|FKBP9_HUMAN Peptidyl-prolyl cis-trans isomerase FKBP9 OS=Homo sapiens GN=FKBP9 PE=1 SV=2	FKBP9	63083.56	O95302	O95302	4	0
14.9689	15.0089	15.3203	14.8718	15.0117	14.2415	14.2298	13.9839	14.122	15.2387	14.9023	15.1136	15.1651	15.8345	15.3243	13.8372	14.0138	14.0579	Homo sapiens	384	>sp|O95336|6PGL_HUMAN 6-phosphogluconolactonase OS=Homo sapiens GN=PGLS PE=1 SV=2	PGLS	27546.87	O95336	O95336	6	0
11.6231	11.5198	11.6951	11.3413	11.6757	11.5547	11.237	11.9596	12.2018	10.4857	10.2376	9.47154	10.5746	11.0368	10.9133	10.1124	9.91123	10.7943	Homo sapiens	385	>sp|O95340|PAPS2_HUMAN Bifunctional 3'-phosphoadenosine 5'-phosphosulfate synthase 2 OS=Homo sapiens GN=PAPSS2 PE=1 SV=2	PAPSS2	69500.71	O95340	O95340	3	0
9.55132	10.5345	7.29621	10.0956	10.6367	9.25159	9.85944	10.1417	9.31785	8.61202	9.43738	9.83432	9.61107	10.2134	8.50505	10.0054	9.67121	10.4359	Homo sapiens	386	>sp|O95342|ABCBB_HUMAN Bile salt export pump OS=Homo sapiens GN=ABCB11 PE=1 SV=2	ABCB11	146407.18	O95342	O95342	1	0
13.8067	13.7969	13.6335	13.8434	13.8096	13.2188	13.6359	13.7756	13.7027	13.6647	13.3916	13.1975	13.5796	13.8424	13.761	13.6234	13.4962	13.8405	Homo sapiens	387	>sp|O95347|SMC2_HUMAN Structural maintenance of chromosomes protein 2 OS=Homo sapiens GN=SMC2 PE=1 SV=2	SMC2	135656.07	O95347	O95347	31	0
10.3054	10.4146	10.5979	10.0589	11.3365	9.45846	10.6312	10.1434	10.1491	11.8803	10.6069	9.92699	9.32544	10.9554	11.1971	11.4098	10.1728	11.0513	Homo sapiens	388	>sp|O95352|ATG7_HUMAN Ubiquitin-like modifier-activating enzyme ATG7 OS=Homo sapiens GN=ATG7 PE=1 SV=1	ATG7	77959.63	O95352	O95352	1	0
13.1244	13.1851	13.2921	13.1997	13.2957	13.0978	12.9524	13.0773	13.0785	12.215	12.225	13.0407	12.185	12.6012	12.2791	11.9815	11.7766	11.1724	Homo sapiens	389	>sp|O95372|LYPA2_HUMAN Acyl-protein thioesterase 2 OS=Homo sapiens GN=LYPLA2 PE=1 SV=1	LYPLA2	24736.95	O95372	O95372	4	0
16.2845	16.2773	16.1341	16.2847	16.2641	16.0287	16.1491	16.2528	16.2514	15.9708	15.7918	15.8406	15.8663	16.1831	16.0227	15.7996	15.8585	15.8718	Homo sapiens	390	>sp|O95373|IPO7_HUMAN Importin-7 OS=Homo sapiens GN=IPO7 PE=1 SV=1	IPO7	119516.51	O95373	O95373	23	0
13.5528	13.4496	12.588	13.7072	13.3556	13.3227	13.644	13.3886	13.3923	12.9332	12.5943	12.8653	13.1304	13.4303	13.3997	13.2882	13.047	12.9468	Homo sapiens	391	>sp|O95394|AGM1_HUMAN Phosphoacetylglucosamine mutase OS=Homo sapiens GN=PGM3 PE=1 SV=1	PGM3	59851.95	O95394	O95394	10	0
12.6764	11.8712	12.1934	12.8939	12.5411	12.9366	13.0128	12.7572	12.4428	12.8016	13.3114	13.428	13.8439	13.1895	13.5934	14.1904	13.6712	13.4825	Homo sapiens	392	>sp|O95400|CD2B2_HUMAN CD2 antigen cytoplasmic tail-binding protein 2 OS=Homo sapiens GN=CD2BP2 PE=1 SV=1	CD2BP2	37646.46	O95400	O95400	5	0
16.0786	16.0695	15.8617	16.122	16.2121	15.6353	15.825	15.9802	15.8847	15.4049	15.1581	15.2306	15.3788	15.7242	15.5261	15.4837	15.6721	15.6542	Homo sapiens	393	>sp|O95433|AHSA1_HUMAN Activator of 90 kDa heat shock protein ATPase homolog 1 OS=Homo sapiens GN=AHSA1 PE=1 SV=1	AHSA1	38274.31	O95433	O95433	15	0
12.5464	12.4153	12.1771	12.1104	12.4307	12.741	13.9107	12.5153	12.2438	12.9447	13.2805	13.3719	13.9408	12.9463	13.6272	13.7532	14.0735	13.4705	Homo sapiens	394	>sp|O95456|PSMG1_HUMAN Proteasome assembly chaperone 1 OS=Homo sapiens GN=PSMG1 PE=1 SV=1	PSMG1	32853.89	O95456	O95456	4	0
10.4258	9.99348	9.04528	10.7724	9.8399	9.75108	8.92285	10.0609	10.3554	8.59243	7.34747	8.1614	10.0403	9.66796	8.50343	9.27857	8.13012	9.86359	Homo sapiens	395	>sp|O95486|SC24A_HUMAN Protein transport protein Sec24A OS=Homo sapiens GN=SEC24A PE=1 SV=2	SEC24A	119749.46	O95486	O95486	4	0
10.6953	11.1373	11.4296	11.8265	11.1086	9.69275	7.39327	9.24354	11.4861	10.457	10.2405	10.2045	9.97166	11.0169	11.1713	10.4688	10.4497	9.92644	Homo sapiens	396	>sp|O95487|SC24B_HUMAN Protein transport protein Sec24B OS=Homo sapiens GN=SEC24B PE=1 SV=2	SEC24B	137417.73	O95487	O95487	1	0.000342818
11.8091	12.1443	11.7378	12.2061	11.9977	12.1275	12.0571	12.3821	12.0435	12.027	12.5196	12.5014	11.7176	12.7306	12.0484	11.9997	12.2604	12.0777	Homo sapiens	397	>sp|O95490|AGRL2_HUMAN Adhesion G protein-coupled receptor L2 OS=Homo sapiens GN=ADGRL2 PE=1 SV=2	ADGRL2	163348.94	O95490	O95490	1	0
10.1605	6.6557	7.80749	8.67782	9.44018	9.61593	10.217	9.54796	8.81546	10.9169	11.3842	11.1206	12.7953	12.1818	12.1447	11.4291	11.0449	11.6108	Homo sapiens	398	>sp|O95571|ETHE1_HUMAN Persulfide dioxygenase ETHE1, mitochondrial OS=Homo sapiens GN=ETHE1 PE=1 SV=2	ETHE1	27872.93	O95571	O95571	4	0
12.6374	13.0599	12.8488	13.3936	13.5218	13.2637	13.382	13.2781	13.5413	12.865	12.667	12.9696	13.598	13.7308	13.0565	12.9313	12.76	13.2499	Homo sapiens	399	>sp|O95573|ACSL3_HUMAN Long-chain-fatty-acid--CoA ligase 3 OS=Homo sapiens GN=ACSL3 PE=1 SV=3	ACSL3	80420.08	O95573	O95573	12	0
11.5438	10.9104	10.7618	11.6839	11.2286	10.7284	10.3203	10.8486	10.516	10.3631	9.18371	11.0953	10.894	10.8274	8.44489	10.7149	10.1412	11.5221	Homo sapiens	400	>sp|O95602|RPA1_HUMAN DNA-directed RNA polymerase I subunit RPA1 OS=Homo sapiens GN=POLR1A PE=1 SV=2	POLR1A	194811.18	O95602	O95602	5	0
12.6492	13.7508	13.5142	13.6705	14.544	14.5283	13.3929	13.361	13.8914	11.9245	12.4372	13.7836	12.9813	13.7189	14.4492	12.9842	13.4947	10.5376	Homo sapiens	401	>sp|O95630|STABP_HUMAN STAM-binding protein OS=Homo sapiens GN=STAMBP PE=1 SV=1	STAMBP	48076.89	O95630	O95630	2	0
12.5854	12.732	12.8476	12.2559	12.609	12.3687	12.0019	12.3356	12.8391	12.9533	12.6143	13.3322	14.0463	13.414	14.5108	13.7845	13.1779	12.1521	Homo sapiens	402	>sp|O95674|CDS2_HUMAN Phosphatidate cytidylyltransferase 2 OS=Homo sapiens GN=CDS2 PE=1 SV=1	CDS2	51417.96	O95674	O95674	3	0
7.15776	8.16634	6.39869	8.7817	7.77691	6.55703	7.64527	8.05121	6.99376	8.89297	8.20694	8.6368	9.95326	8.4919	8.65065	10.1409	7.39767	9.25436	Homo sapiens	403	>sp|O95721|SNP29_HUMAN Synaptosomal-associated protein 29 OS=Homo sapiens GN=SNAP29 PE=1 SV=1	SNAP29	28970.32	O95721	O95721	2	0.001609788
14.1289	14.0324	14.0325	14.1017	14.5156	13.8916	14.6253	14.0163	14.2213	14.9974	14.9619	14.7687	14.501	14.5097	14.7358	14.6733	14.8393	14.7368	Homo sapiens	404	>sp|O95747|OXSR1_HUMAN Serine/threonine-protein kinase OSR1 OS=Homo sapiens GN=OXSR1 PE=1 SV=1	OXSR1	58022.19	O95747	O95747	9	0
7.467	7.96665	7.56466	8.35293	10.6537	4.58225	9.54593	8.5571	7.38562	9.39225	8.19441	8.78082	8.55837	9.34091	9.79131	9.07918	7.77516	7.59801	Homo sapiens	405	>sp|O95749|GGPPS_HUMAN Geranylgeranyl pyrophosphate synthase OS=Homo sapiens GN=GGPS1 PE=1 SV=1	GGPS1	34870.89	O95749	O95749	1	0.001609788
15.901	16.007	15.9693	15.8998	16.0379	15.9375	15.7765	15.9876	15.9708	15.1126	15.2375	15.3872	15.3815	15.4394	15.302	15.5836	15.8561	15.6162	Homo sapiens	406	>sp|O95757|HS74L_HUMAN Heat shock 70 kDa protein 4L OS=Homo sapiens GN=HSPA4L PE=1 SV=3	HSPA4L	94512.49	O95757	O95757	21	0
16.0272	16.3722	16.1964	16.5444	16.2708	16.0373	16.3115	15.8511	15.6351	16.4141	16.1437	16.1214	16.418	16.3518	16.3531	16.4551	16.4155	16.6247	Homo sapiens	407	>sp|O95758|PTBP3_HUMAN Polypyrimidine tract-binding protein 3 OS=Homo sapiens GN=PTBP3 PE=1 SV=2	PTBP3	59689.55	O95758	O95758	8	0
13.0655	13.082	12.9718	12.9776	12.5952	13.1219	12.4903	13.1045	13.11	14.3137	14.5279	13.7453	12.8499	12.4892	13.3599	13.3513	13.6014	13.4614	Homo sapiens	408	>sp|O95777|LSM8_HUMAN U6 snRNA-associated Sm-like protein LSm8 OS=Homo sapiens GN=LSM8 PE=1 SV=3	LSM8	10402.64	O95777	O95777	4	0
14.3151	14.4095	14.1737	14.4066	14.3603	13.9497	14.2222	14.1576	14.3698	13.4339	13.102	13.0095	13.0861	13.4573	13.5057	12.9939	12.6724	12.8575	Homo sapiens	409	>sp|O95782|AP2A1_HUMAN AP-2 complex subunit alpha-1 OS=Homo sapiens GN=AP2A1 PE=1 SV=3	AP2A1	107545.88	O95782	O95782	26	0
13.6476	13.7855	13.8832	13.9387	13.7544	13.4225	13.1798	13.4481	13.743	11.8542	12.1306	13.0673	12.5339	12.5818	12.5652	12.2542	12.0827	11.0863	Homo sapiens	410	>sp|O95793|STAU1_HUMAN Double-stranded RNA-binding protein Staufen homolog 1 OS=Homo sapiens GN=STAU1 PE=1 SV=2	STAU1	63182.28	O95793	O95793	10	0
14.2727	14.0755	14.0266	14.3034	14.1283	14.297	14.1684	13.8135	14.0881	14.2604	14.4851	14.4761	14.3425	14.4396	14.1123	14.2965	14.0267	14.337	Homo sapiens	411	>sp|O95816|BAG2_HUMAN BAG family molecular chaperone regulator 2 OS=Homo sapiens GN=BAG2 PE=1 SV=1	BAG2	23771.92	O95816	O95816	7	0
11.4837	10.9074	11.01	11.3641	12.4152	11.0984	12.5975	11.4686	11.9294	12.0852	9.59474	12.1319	12.9145	12.7001	12.3855	13.5597	13.6451	12.7322	Homo sapiens	412	>sp|O95817|BAG3_HUMAN BAG family molecular chaperone regulator 3 OS=Homo sapiens GN=BAG3 PE=1 SV=3	BAG3	61594.68	O95817	O95817	8	0
11.9207	10.7338	8.13824	12.4063	11.2442	10.5461	11.8225	10.3122	10.1098	9.06788	7.24272	8.70296	11.4659	9.77584	7.89087	11.173	11.1275	13.3326	Homo sapiens	413	>sp|O95819|M4K4_HUMAN Mitogen-activated protein kinase kinase kinase kinase 4 OS=Homo sapiens GN=MAP4K4 PE=1 SV=2	MAP4K4	142100.79	O95819	O95819	6	0
15.7288	15.9418	16.0508	15.9843	15.9921	16.0294	15.943	15.9108	16.0391	16.6441	16.6549	16.1144	16.1836	16.1027	16.2366	15.9264	15.7476	16.2786	Homo sapiens	414	>sp|O95831|AIFM1_HUMAN Apoptosis-inducing factor 1, mitochondrial OS=Homo sapiens GN=AIFM1 PE=1 SV=1	AIFM1	66900.6	O95831	O95831	25	0
8.10638	8.29446	8.2978	10.2075	7.80745	10.0763	7.23312	9.16295	9.14768	7.36061	7.6263	9.2405	8.79212	8.50787	7.11941	9.28018	7.82118	8.33423	Homo sapiens	415	>sp|O95832|CLD1_HUMAN Claudin-1 OS=Homo sapiens GN=CLDN1 PE=1 SV=1	CLDN1	22743.83	O95832	O95832	1	0
11.0543	11.2224	11.5083	11.483	11.745	11.6646	11.5716	11.3723	11.8076	10.2588	10.3566	10.4182	9.97878	10.72	11.1349	9.88865	10.3514	9.22405	Homo sapiens	416	>sp|O95834|EMAL2_HUMAN Echinoderm microtubule-associated protein-like 2 OS=Homo sapiens GN=EML2 PE=1 SV=1	EML2	70678.79	O95834	O95834	5	0
15.9069	15.6418	16.3041	15.822	16.1474	16.4459	16.0952	16.1948	15.8553	16.2043	16.6204	16.7172	16.6891	16.4704	16.3957	16.3817	16.5544	16.3472	Homo sapiens	417	>sp|O95861|BPNT1_HUMAN 3'(2'),5'-bisphosphate nucleotidase 1 OS=Homo sapiens GN=BPNT1 PE=1 SV=1	BPNT1	33392.33	O95861	O95861	12	0
14.9274	14.9887	15.4844	14.712	15.3574	15.6264	15.0569	15.4147	15.2055	15.9188	16.261	15.5556	15.1742	15.5823	15.8054	15.7498	15.9083	15.9363	Homo sapiens	418	>sp|O95881|TXD12_HUMAN Thioredoxin domain-containing protein 12 OS=Homo sapiens GN=TXNDC12 PE=1 SV=1	TXNDC12	19205.77	O95881	O95881	3	0
12.2503	9.86771	10.8983	13.8296	11.9025	11.6093	12.4573	11.2793	11.7126	14.3792	14.2803	13.7722	14.8938	13.9458	14.5575	13.5626	13.876	14.139	Homo sapiens	419	>sp|O95999|BCL10_HUMAN B-cell lymphoma/leukemia 10 OS=Homo sapiens GN=BCL10 PE=1 SV=1	BCL10	26251.58	O95999	O95999	2	0
13.0488	12.6141	12.898	13.0981	12.6474	12.7747	12.9931	12.7078	12.8109	13.7357	13.897	13.6474	13.1663	13.3976	13.5215	13.4326	13.8743	13.5829	Homo sapiens	420	>sp|O96005|CLPT1_HUMAN Cleft lip and palate transmembrane protein 1 OS=Homo sapiens GN=CLPTM1 PE=1 SV=1	CLPTM1	76096.67	O96005	O96005	5	0
11.1876	10.5574	8.7739	10.3696	11.1436	10.5465	9.69022	10.5943	10.7036	10.0922	10.5136	10.765	11.5552	12.207	10.9787	11.189	11.4936	11.7816	Homo sapiens	421	>sp|O96007|MOC2B_HUMAN Molybdopterin synthase catalytic subunit OS=Homo sapiens GN=MOCS2 PE=1 SV=1	MOCS2	20943.98	O96007	O96007	1	0.000342818
11.0141	10.9095	11.138	10.6208	10.2661	11.0575	10.3386	10.9959	11.0606	10.5499	8.86358	10.5549	11.0902	10.3079	10.6077	11.1606	10.7074	10.1771	Homo sapiens	422	>sp|O96013|PAK4_HUMAN Serine/threonine-protein kinase PAK 4 OS=Homo sapiens GN=PAK4 PE=1 SV=1	PAK4	64072.05	O96013	O96013	1	0
12.7286	12.6242	12.8754	13.21	12.6325	13.0545	12.3351	12.8839	12.8259	14.0656	14.3695	13.7677	13.893	13.8032	13.9824	13.8556	13.8361	14.1614	Homo sapiens	423	>sp|O96019|ACL6A_HUMAN Actin-like protein 6A OS=Homo sapiens GN=ACTL6A PE=1 SV=1	ACTL6A	47460.96	O96019	O96019	9	0
20.3266	20.4082	20.2207	20.552	20.5238	20.1587	20.4419	20.2818	20.5782	20.1042	19.7731	19.845	19.8534	20.1297	19.9148	19.8529	19.7267	19.9602	Homo sapiens	424	>sp|P00338|LDHA_HUMAN L-lactate dehydrogenase A chain OS=Homo sapiens GN=LDHA PE=1 SV=2	LDHA	36688.72	P00338	P00338	33	0
17.9681	17.9804	18.0239	18.0139	18.3076	18.3651	18.432	18.3114	18.2763	18.3345	18.6569	18.5693	18.881	18.5666	18.6616	18.7679	18.8727	18.8089	Homo sapiens	425	>sp|P00352|AL1A1_HUMAN Retinal dehydrogenase 1 OS=Homo sapiens GN=ALDH1A1 PE=1 SV=2	ALDH1A1	54861.84	P00352	P00352	32	0
14.4895	14.5525	14.6162	14.3725	14.7342	14.64	14.6812	14.6824	14.5674	14.2081	14.4438	14.0191	13.6688	13.6594	13.6225	13.6628	13.6329	13.9963	Homo sapiens	426	>sp|P00367|DHE3_HUMAN Glutamate dehydrogenase 1, mitochondrial OS=Homo sapiens GN=GLUD1 PE=1 SV=2	GLUD1	61397.86	P00367	P00367	18	0
15.4039	15.2993	15.5719	15.3791	15.6588	15.2691	15.56	15.6888	15.3413	15.7907	16.0234	16.3473	16.1704	16.4355	16.1736	16.1421	16.4502	15.9853	Homo sapiens	427	>sp|P00374|DYR_HUMAN Dihydrofolate reductase OS=Homo sapiens GN=DHFR PE=1 SV=2	DHFR	21452.73	P00374	P00374	10	0
15.3561	15.2521	15.558	15.3728	15.4289	15.7416	15.2795	15.4845	15.6991	16.5446	17.0034	16.7681	16.7877	16.7371	16.5887	16.4345	16.5514	16.6726	Homo sapiens	428	>sp|P00387|NB5R3_HUMAN NADH-cytochrome b5 reductase 3 OS=Homo sapiens GN=CYB5R3 PE=1 SV=3	CYB5R3	34234.85	P00387	P00387	16	0
14.6444	14.8515	14.7909	14.687	15.2049	15.2175	15.3806	15.2026	15.1832	15.2603	15.8856	15.6357	15.6649	15.1042	15.3586	15.9122	15.9666	15.9026	Homo sapiens	429	>sp|P00491|PNPH_HUMAN Purine nucleoside phosphorylase OS=Homo sapiens GN=PNP PE=1 SV=2	PNP	32117.86	P00491	P00491	11	0
15.2257	15.148	14.9504	15.2969	15.1597	15.0211	15.3296	14.9052	15.3569	15.072	14.891	14.5624	14.4845	14.9394	14.8618	14.76	14.7496	15.0241	Homo sapiens	430	>sp|P00492|HPRT_HUMAN Hypoxanthine-guanine phosphoribosyltransferase OS=Homo sapiens GN=HPRT1 PE=1 SV=2	HPRT1	24579.38	P00492	P00492	13	0
17.0513	17.023	17.0781	16.9426	17.221	17.0103	17.1142	17.2094	17.1649	16.6322	16.7538	16.1801	15.9477	16.1669	16.4786	16.1232	16.164	16.2352	Homo sapiens	431	>sp|P00505|AATM_HUMAN Aspartate aminotransferase, mitochondrial OS=Homo sapiens GN=GOT2 PE=1 SV=3	GOT2	47517.65	P00505	P00505	28	0
19.4233	19.4297	19.3119	19.4932	19.5976	19.3233	19.5275	19.4044	19.6059	18.9731	19.0864	18.9182	19.0795	18.9599	19.1034	19.1537	19.1339	19.1717	Homo sapiens	432	>sp|P00558|PGK1_HUMAN Phosphoglycerate kinase 1 OS=Homo sapiens GN=PGK1 PE=1 SV=3	PGK1	44614.68	P00558	P00558	46	0
13.2877	13.2092	13.4444	13.4167	13.6055	13.3972	13.2508	13.4509	13.2635	13.0514	13.251	13.5407	13.5415	13.4116	13.4561	13.5604	13.4417	13.132	Homo sapiens	433	>sp|P00568|KAD1_HUMAN Adenylate kinase isoenzyme 1 OS=Homo sapiens GN=AK1 PE=1 SV=3	AK1	21634.84	P00568	P00568	8	0
14.1766	13.8388	14.8032	14.3471	14.6045	14.8517	14.8315	14.8791	14.2328	14.465	15.2364	15.8754	16.5729	16.2345	15.891	15.41	15.4647	14.9253	Homo sapiens	434	>sp|P00918|CAH2_HUMAN Carbonic anhydrase 2 OS=Homo sapiens GN=CA2 PE=1 SV=2	CA2	29246.05	P00918	P00918	10	0
17.3126	17.4645	17.2874	17.4866	17.4886	17.1144	17.1933	17.3528	17.5208	16.6446	16.4968	16.436	16.3909	16.871	16.5581	16.2282	16.2946	16.4689	Homo sapiens	435	>sp|P00966|ASSY_HUMAN Argininosuccinate synthase OS=Homo sapiens GN=ASS1 PE=1 SV=2	ASS1	46530.37	P00966	P00966	20	0
9.96345	9.14508	9.46872	10.8306	13.5556	11.1171	13.2671	11.5072	13.1707	7.04127	8.35465	7.88092	11.9859	11.0963	11.8686	15.3007	15.616	14.9479	Homo sapiens	436	>sp|P01034|CYTC_HUMAN Cystatin-C OS=Homo sapiens GN=CST3 PE=1 SV=1	CST3	15799.22	P01034	P01034	3	0
12.5677	12.5405	12.04	12.7086	12.5576	11.2051	11.6441	12.2427	12.4886	12.658	12.6716	10.6694	12.6908	12.8726	15.2399	12.6526	12.626	12.1765	Homo sapiens	437	>sp|P01111|RASN_HUMAN GTPase NRas OS=Homo sapiens GN=NRAS PE=1 SV=1	NRAS	21229.16	P01111	P01111	3	0
11.2241	11.1833	11.7762	10.7426	10.0788	10.8888	11.5242	11.4606	11.4021	10.0188	9.92118	8.42713	10.0645	10.5072	9.15794	9.39719	9.00835	11.8735	Homo sapiens	438	>sp|P01116|RASK_HUMAN GTPase KRas OS=Homo sapiens GN=KRAS PE=1 SV=1	KRAS	21655.82	P01116	P01116	1	0.001609788
13.2226	15.1136	14.0445	15.3959	14.8365	15.6062	15.5837	15.5812	14.4658	13.9886	14.0488	13.7125	14.4657	15.3558	15.1611	15.3499	15.3428	15.4022	Homo sapiens	439	>sp|P01891|1A68_HUMAN HLA class I histocompatibility antigen, A-68 alpha chain OS=Homo sapiens GN=HLA-A PE=1 SV=4	HLA-A	40908.78	P01891	P01891	2	0.006315125
15.4819	15.5756	15.7875	15.7127	15.6961	16.1089	15.5677	16.0146	15.482	12.0682	11.3912	12.8439	13.985	13.959	13.7366	13.007	14.3501	12.7998	Homo sapiens	440	>sp|P02511|CRYAB_HUMAN Alpha-crystallin B chain OS=Homo sapiens GN=CRYAB PE=1 SV=2	CRYAB	20158.91	P02511	P02511	12	0
17.2101	17.7314	17.4792	17.1964	17.0351	17.2466	17.0778	17.1961	16.8271	19.3691	19.5745	19.0847	18.8353	18.601	18.9903	18.7683	18.9193	18.9587	Homo sapiens	442	>sp|P02545|LMNA_HUMAN Prelamin-A/C OS=Homo sapiens GN=LMNA PE=1 SV=1	LMNA	74139.48	P02545	P02545	66	0
14.4618	14.7767	14.945	15.0257	15.985	15.3911	15.7888	15.4844	15.7875	13.5493	13.6595	13.9351	15.1184	15.4328	15.2139	16.0629	16.2723	15.8986	Homo sapiens	443	>sp|P02649|APOE_HUMAN Apolipoprotein E OS=Homo sapiens GN=APOE PE=1 SV=1	APOE	36154.08	P02649	P02649	7	0
14.4902	14.8049	14.4502	14.861	15.6158	14.7254	15.1817	14.9438	15.1633	13.0997	13.1821	13.696	13.9697	14.3936	14.1186	15.6422	15.4912	15.0748	Homo sapiens	444	>sp|P02786|TFR1_HUMAN Transferrin receptor protein 1 OS=Homo sapiens GN=TFRC PE=1 SV=2	TFRC	84871.37	P02786	P02786	14	0
15.0556	16.3907	15.371	16.5062	16.3472	16.6295	15.5535	15.7916	15.2778	15.2899	8.57511	15.424	17.0831	17.0354	15.1018	17.0066	16.5468	15.2428	Homo sapiens	445	>sp|P02794|FRIH_HUMAN Ferritin heavy chain OS=Homo sapiens GN=FTH1 PE=1 SV=2	FTH1	21225.63	P02794	P02794	3	0.000674992
7.36687	7.95296	8.39157	8.2532	7.05844	8.65942	6.54639	6.27154	7.54536	14.3218	15.2212	13.2438	9.13741	9.61539	12.1026	13.1677	14.1756	12.4731	Homo sapiens	446	>sp|P02795|MT2_HUMAN Metallothionein-2 OS=Homo sapiens GN=MT2A PE=1 SV=1;>sp|P04731|MT1A_HUMAN Metallothionein-1A OS=Homo sapiens GN=MT1A PE=1 SV=2;>sp|P13640|MT1G_HUMAN Metallothionein-1G OS=Homo sapiens GN=MT1G PE=1 SV=2;>sp|P80294|MT1H_HUMAN Metallothionein-1H OS=Homo sapiens GN=MT1H PE=1 SV=1;>sp|P80297|MT1X_HUMAN Metallothionein-1X OS=Homo sapiens GN=MT1X PE=1 SV=1	MT2A;MT1A;MT1G;MT1H;MT1X	6042.16;6120.29;6141.34;6039.25;6068.24	P02795;P04731;P13640;P80294;P80297	P02795;P04731;P13640;P80294;P80297	1	0
14.4724	14.2283	14.5397	14.4624	14.8343	14.8991	14.6344	14.8068	14.8601	16.2242	16.3404	15.8211	16.1779	15.6062	16.1348	15.7013	15.5825	15.8603	Homo sapiens	447	>sp|P04040|CATA_HUMAN Catalase OS=Homo sapiens GN=CAT PE=1 SV=3	CAT	59756.17	P04040	P04040	18	0
12.4233	12.9685	12.6999	12.5435	12.5037	13.1983	12.0662	12.9531	12.7205	12.6568	13.3097	12.7661	10.894	12.4206	12.1865	12.7888	13.2085	12.6866	Homo sapiens	448	>sp|P04062|GLCM_HUMAN Glucosylceramidase OS=Homo sapiens GN=GBA PE=1 SV=3	GBA	59716.28	P04062	P04062	1	0
19.153	19.2989	19.4092	19.2472	19.6699	19.6168	19.6045	19.5665	19.6169	19.7248	20.0133	19.8932	19.8409	19.6792	19.7878	19.9274	20.066	19.9449	Homo sapiens	449	>sp|P04075|ALDOA_HUMAN Fructose-bisphosphate aldolase A OS=Homo sapiens GN=ALDOA PE=1 SV=2	ALDOA	39420.01	P04075	P04075	50	0
10.0407	10.2279	10.6974	10.3374	11.4231	11.0404	10.689	11.1666	10.7379	9.35282	10.168	11.1574	12.513	12.3358	12.6236	13.3185	13.3604	11.7433	Homo sapiens	450	>sp|P04080|CYTB_HUMAN Cystatin-B OS=Homo sapiens GN=CSTB PE=1 SV=2	CSTB	11139.59	P04080	P04080	2	0
18.8013	18.8707	19.0677	18.7909	19.0372	19.1656	19.1825	19.1247	19.1302	19.6385	19.9369	19.4512	19.4062	19.2409	19.4591	19.6966	19.8739	19.9862	Homo sapiens	451	>sp|P04083|ANXA1_HUMAN Annexin A1 OS=Homo sapiens GN=ANXA1 PE=1 SV=2	ANXA1	38714.24	P04083	P04083	26	0
14.0918	13.7683	13.6766	15.5122	16.5045	15.5296	16.8572	15.4976	16.8033	12.8075	13.2334	13.5455	15.6812	15.8028	15.787	16.2571	16.309	15.713	Homo sapiens	452	>sp|P04114|APOB_HUMAN Apolipoprotein B-100 OS=Homo sapiens GN=APOB PE=1 SV=2	APOB	515604.72	P04114	P04114	10	0
12.7866	13.628	12.9713	12.9266	13.4023	13.3894	13.3629	13.3522	13.1168	14.9805	15.7136	14.8246	15.5763	14.7995	15.2287	15.123	15.0711	15.5787	Homo sapiens	453	>sp|P04179|SODM_HUMAN Superoxide dismutase [Mn], mitochondrial OS=Homo sapiens GN=SOD2 PE=1 SV=2	SOD2	24722.08	P04179	P04179	6	0
14.2888	13.9958	14.2668	14.3251	14.5611	14.5462	14.5984	14.6272	14.5029	14.6668	14.4903	13.7666	14.0143	14.0163	14.5574	14.0316	14.5855	14.5784	Homo sapiens	454	>sp|P04181|OAT_HUMAN Ornithine aminotransferase, mitochondrial OS=Homo sapiens GN=OAT PE=1 SV=1	OAT	48534.83	P04181	P04181	8	0
10.9691	9.148	9.49241	10.144	11.1216	11.2232	10.3987	10.6662	5.66912	9.51467	10.3057	10.3336	12.4007	11.8528	11.7874	12.546	11.841	12.1094	Homo sapiens	455	>sp|P04183|KITH_HUMAN Thymidine kinase, cytosolic OS=Homo sapiens GN=TK1 PE=1 SV=2	TK1	25468.69	P04183	P04183	4	0
9.27352	6.63619	8.09157	8.20378	8.83628	8.30483	6.99904	9.00521	8.15568	6.44298	9.47593	6.71804	8.06514	7.36415	6.89243	6.33157	7.61194	9.03539	Homo sapiens	457	>sp|P04350|TBB4A_HUMAN Tubulin beta-4A chain OS=Homo sapiens GN=TUBB4A PE=1 SV=2	TUBB4A	49585.77	P04350	P04350	1	0.000342818
18.6246	18.5995	18.3956	18.6429	18.6387	18.4516	18.3148	18.539	18.6583	18.81	18.4243	18.6371	18.4888	18.83	18.6573	18.4075	18.2059	18.2889	Homo sapiens	458	>sp|P04406|G3P_HUMAN Glyceraldehyde-3-phosphate dehydrogenase OS=Homo sapiens GN=GAPDH PE=1 SV=3	GAPDH	36053.21	P04406	P04406	20	0
13.5536	13.4706	13.2064	13.4432	13.5386	13.3055	13.6998	13.2793	13.2942	13.5667	13.2157	13.6451	13.5601	13.9389	13.9261	13.9619	13.9626	13.5318	Homo sapiens	459	>sp|P04424|ARLY_HUMAN Argininosuccinate lyase OS=Homo sapiens GN=ASL PE=1 SV=4	ASL	51657.97	P04424	P04424	9	0
12.8795	12.5878	12.4556	12.7136	12.5221	12.6326	12.6472	12.7717	12.1875	13.573	13.2706	12.4874	12.2715	12.0148	12.6392	12.39	12.3113	12.7889	Homo sapiens	460	>sp|P04632|CPNS1_HUMAN Calpain small subunit 1 OS=Homo sapiens GN=CAPNS1 PE=1 SV=1	CAPNS1	28315.71	P04632	P04632	7	0
18.4899	18.5395	18.6064	18.5541	18.7556	18.7498	18.7355	18.7305	18.7579	17.2865	17.2509	17.6257	18.098	18.4403	18.1918	18.6732	18.897	18.5055	Homo sapiens	461	>sp|P04792|HSPB1_HUMAN Heat shock protein beta-1 OS=Homo sapiens GN=HSPB1 PE=1 SV=2	HSPB1	22782.52	P04792	P04792	28	0
9.86845	9.74875	10.5288	9.08989	9.59566	10.2182	9.02084	9.95636	9.1133	11.1057	11.2217	11.4101	12.5106	12.1757	12.3098	11.7458	12.2552	11.7874	Homo sapiens	462	>sp|P04818|TYSY_HUMAN Thymidylate synthase OS=Homo sapiens GN=TYMS PE=1 SV=3	TYMS	35715.96	P04818	P04818	3	0
16.6445	16.8668	16.8178	16.5307	16.3432	16.3367	16.0234	16.2686	16.3744	17.0327	16.7579	16.7206	16.5025	16.8998	16.5489	16.3382	16.2815	16.6368	Homo sapiens	463	>sp|P04843|RPN1_HUMAN Dolichyl-diphosphooligosaccharide--protein glycosyltransferase subunit 1 OS=Homo sapiens GN=RPN1 PE=1 SV=1	RPN1	68569.42	P04843	P04843	27	0
15.5782	15.7376	15.3959	15.4859	15.1732	15.4324	15.2136	15.1484	15.488	15.3427	14.8964	15.0678	15.2339	15.3563	15.0039	15.1636	14.9095	15.3796	Homo sapiens	464	>sp|P04844|RPN2_HUMAN Dolichyl-diphosphooligosaccharide--protein glycosyltransferase subunit 2 OS=Homo sapiens GN=RPN2 PE=1 SV=3	RPN2	69284	P04844	P04844	14	0
7.08892	7.98882	8.30626	9.85882	7.62942	7.13816	9.50298	8.30115	8.6307	4.71272	9.17704	8.83322	10.3375	9.59457	8.50888	8.91253	6.5556	7.30287	Homo sapiens	465	>sp|P04899|GNAI2_HUMAN Guanine nucleotide-binding protein G(i) subunit alpha-2 OS=Homo sapiens GN=GNAI2 PE=1 SV=3	GNAI2	40450.9	P04899	P04899	1	0.001609788
17.107	17.2647	17.1472	17.1562	17.5837	17.4881	17.4368	17.5644	17.4828	17.544	17.7288	17.6344	17.6278	17.5977	17.6724	17.7389	17.9105	17.7671	Homo sapiens	466	>sp|P05023|AT1A1_HUMAN Sodium/potassium-transporting ATPase subunit alpha-1 OS=Homo sapiens GN=ATP1A1 PE=1 SV=1	ATP1A1	112896.09	P05023	P05023	40	0
13.3036	13.4685	13.3211	13.3022	13.7755	13.6564	13.9137	13.7269	13.6517	14.0566	14.3397	13.9128	14.1593	13.8986	14.3079	13.9034	14.1563	14.0362	Homo sapiens	467	>sp|P05026|AT1B1_HUMAN Sodium/potassium-transporting ATPase subunit beta-1 OS=Homo sapiens GN=ATP1B1 PE=1 SV=1	ATP1B1	35061.3	P05026	P05026	6	0
12.4323	11.7575	13.1258	13.3397	13.9119	12.0676	14.0821	13.4727	13.2408	11.8436	12.1221	12.3104	13.4426	12.9565	13.2482	15.0331	15.1758	14.7281	Homo sapiens	468	>sp|P05067|A4_HUMAN Amyloid beta A4 protein OS=Homo sapiens GN=APP PE=1 SV=3	APP	86943.24	P05067	P05067	8	0
17.6598	17.5615	17.5813	17.5764	17.8162	17.9159	18.1104	17.557	17.8454	18.5626	18.5917	18.3121	18.6746	18.3329	18.554	18.236	18.6078	18.6367	Homo sapiens	469	>sp|P05091|ALDH2_HUMAN Aldehyde dehydrogenase, mitochondrial OS=Homo sapiens GN=ALDH2 PE=1 SV=2	ALDH2	56381.31	P05091	P05091	19	0
15.3769	15.1477	15.1532	15.3785	15.8922	15.3404	15.7732	15.5908	15.5813	15.9519	16.3119	16.0176	16.097	16.1047	16.2904	16.5078	16.8294	16.5934	Homo sapiens	470	>sp|P05106|ITB3_HUMAN Integrin beta-3 OS=Homo sapiens GN=ITGB3 PE=1 SV=2	ITGB3	87057.81	P05106	P05106	15	0
14.2406	14.1333	12.9563	14.471	13.6021	13.8355	14.3418	13.9384	13.5259	13.5069	13.7438	14.0636	14.5742	13.8297	13.667	13.603	13.1327	13.4646	Homo sapiens	471	>sp|P05114|HMGN1_HUMAN Non-histone chromosomal protein HMG-14 OS=Homo sapiens GN=HMGN1 PE=1 SV=3	HMGN1	10658.9	P05114	P05114	7	0
14.7193	14.7588	14.3416	14.5399	14.1311	14.3286	13.8398	14.646	13.5115	12.8342	11.3529	12.7166	12.5439	12.3349	12.2962	13.1818	12.9597	12.5908	Homo sapiens	472	>sp|P05121|PAI1_HUMAN Plasminogen activator inhibitor 1 OS=Homo sapiens GN=SERPINE1 PE=1 SV=1	SERPINE1	45059.98	P05121	P05121	8	0
13.9433	14.2178	14.069	13.1883	12.869	12.8022	11.9029	12.9711	12.9034	13.7253	13.1407	13.0181	12.5998	13.3103	13.0729	12.094	11.8895	12.2889	Homo sapiens	473	>sp|P05141|ADT2_HUMAN ADP/ATP translocase 2 OS=Homo sapiens GN=SLC25A5 PE=1 SV=7	SLC25A5	32852.23	P05141	P05141	9	0
11.4891	11.488	11.4604	10.9487	11.0489	10.8083	11.2554	11.285	10.8695	10.4153	11.0281	11.5557	11.9073	11.7545	11.3944	11.9565	11.1931	11.1774	Homo sapiens	474	>sp|P05161|ISG15_HUMAN Ubiquitin-like protein ISG15 OS=Homo sapiens GN=ISG15 PE=1 SV=5	ISG15	17887.5	P05161	P05161	1	0
16.6058	16.6139	16.3273	16.449	16.3884	16.4035	16.2206	16.4495	16.1441	16.2914	16.3932	16.4018	16.1804	16.4041	16.2842	16.1242	16.103	16.0621	Homo sapiens	475	>sp|P05198|IF2A_HUMAN Eukaryotic translation initiation factor 2 subunit 1 OS=Homo sapiens GN=EIF2S1 PE=1 SV=3	EIF2S1	36112.16	P05198	P05198	19	0
15.9981	16.2346	16.5151	16.643	15.8593	16.9014	16.2199	16.4428	15.5102	15.8754	15.7399	16.5725	17.1777	16.6857	16.2584	14.9085	15.3556	15.0405	Homo sapiens	476	>sp|P05204|HMGN2_HUMAN Non-histone chromosomal protein HMG-17 OS=Homo sapiens GN=HMGN2 PE=1 SV=3	HMGN2	9392.67	P05204	P05204	6	0
11.4127	10.824	10.7468	11.8477	10.8868	10.9293	10.4163	10.5311	10.0826	10.2805	8.32001	9.76531	7.77523	7.82866	7.63398	7.79217	8.29269	7.74534	Homo sapiens	477	>sp|P05386|RLA1_HUMAN 60S acidic ribosomal protein P1 OS=Homo sapiens GN=RPLP1 PE=1 SV=1	RPLP1	11513.93	P05386	P05386	1	0
16.0262	15.7598	16.3249	16.1431	15.7352	16.1004	15.8152	16.0251	16.0461	14.8961	14.9622	14.7575	14.4753	15.0781	14.5926	15.1848	14.553	15.2247	Homo sapiens	478	>sp|P05387|RLA2_HUMAN 60S acidic ribosomal protein P2 OS=Homo sapiens GN=RPLP2 PE=1 SV=1	RPLP2	11664.93	P05387	P05387	5	0
17.7106	17.818	17.7066	17.7175	17.6199	17.6298	17.457	17.6695	17.7131	17.6806	17.5504	17.7026	17.3087	17.5675	17.3058	17.5019	17.5619	17.5771	Homo sapiens	479	>sp|P05388|RLA0_HUMAN 60S acidic ribosomal protein P0 OS=Homo sapiens GN=RPLP0 PE=1 SV=1	RPLP0	34273.5	P05388	P05388	13	0
15.7186	15.855	15.7216	15.732	15.9607	15.8725	15.968	15.8062	16.0651	16.3704	16.5585	16.6674	16.2719	16.0928	16.1942	16.6229	16.8207	16.507	Homo sapiens	480	>sp|P05455|LA_HUMAN Lupus La protein OS=Homo sapiens GN=SSB PE=1 SV=2	SSB	46837.05	P05455	P05455	30	0
14.1731	14.3131	14.1064	13.6608	13.5756	13.8742	13.1126	13.6087	13.781	15.2689	13.3975	13.8042	12.388	12.3074	13.228	12.8926	11.8826	12.0363	Homo sapiens	481	>sp|P05496|AT5G1_HUMAN ATP synthase F(0) complex subunit C1, mitochondrial OS=Homo sapiens GN=ATP5G1 PE=1 SV=2;>sp|P48201|AT5G3_HUMAN ATP synthase F(0) complex subunit C3, mitochondrial OS=Homo sapiens GN=ATP5G3 PE=2 SV=1;>sp|Q06055|AT5G2_HUMAN ATP synthase F(0) complex subunit C2, mitochondrial OS=Homo sapiens GN=ATP5G2 PE=2 SV=1	ATP5G1;ATP5G3;ATP5G2	14276.73;14693.07;14637.21	P05496;P48201;Q06055	P05496;P48201;Q06055	1	0
15.8163	16.0382	15.875	15.95	16.4707	16.2976	16.4627	16.3727	16.366	16.4757	16.7522	16.6957	16.8907	16.6042	16.697	17.0771	17.3019	17.1581	Homo sapiens	482	>sp|P05556|ITB1_HUMAN Integrin beta-1 OS=Homo sapiens GN=ITGB1 PE=1 SV=2	ITGB1	88415.27	P05556	P05556	15	0
18.0724	18.3966	18.6785	18.2244	16.9997	18.3738	17.3973	17.4711	18.4893	17.6227	17.6511	17.566	17.179	17.3603	16.4607	15.1841	15.1074	16.0256	Homo sapiens	483	>sp|P05783|K1C18_HUMAN Keratin, type I cytoskeletal 18 OS=Homo sapiens GN=KRT18 PE=1 SV=2	KRT18	48057.81	P05783	P05783	30	0
5.8213	6.29791	7.96069	8.24735	7.92187	7.45001	6.90401	6.4331	6.93497	10.4076	9.68043	10.1585	12.7307	7.32169	10.1427	11.3202	10.7937	10.826	Homo sapiens	485	>sp|P06132|DCUP_HUMAN Uroporphyrinogen decarboxylase OS=Homo sapiens GN=UROD PE=1 SV=2	UROD	40786.9	P06132	P06132	3	0
15.4911	15.5176	15.8126	15.4269	15.7487	16.0201	15.8696	15.7543	15.8209	16.0657	16.4896	16.3131	16.1843	15.9752	16.077	15.7668	15.8048	15.7531	Homo sapiens	486	>sp|P06396|GELS_HUMAN Gelsolin OS=Homo sapiens GN=GSN PE=1 SV=1	GSN	85697.51	P06396	P06396	23	0
14.4211	14.4761	13.9819	14.2879	13.8337	13.9792	13.8546	14.0677	13.999	13.4522	13.2428	13.3133	13.5793	13.9979	13.8627	13.8053	13.5594	13.6424	Homo sapiens	487	>sp|P06400|RB_HUMAN Retinoblastoma-associated protein OS=Homo sapiens GN=RB1 PE=1 SV=2	RB1	106159.41	P06400	P06400	17	0
18.705	18.1042	18.245	18.873	18.3111	18.292	18.5125	18.3602	17.9996	17.8769	17.1774	18.0521	17.5473	17.3212	17.345	18.4131	18.031	17.7864	Homo sapiens	488	>sp|P06454|PTMA_HUMAN Prothymosin alpha OS=Homo sapiens GN=PTMA PE=1 SV=2	PTMA	12202.96	P06454	P06454	10	0
16.4498	16.3633	16.2089	16.3812	16.2234	16.0289	15.9362	16.1765	16.1302	15.2505	14.7834	15.0511	15.1979	15.7779	15.6079	15.2732	15.2334	15.0992	Homo sapiens	489	>sp|P06493|CDK1_HUMAN Cyclin-dependent kinase 1 OS=Homo sapiens GN=CDK1 PE=1 SV=3	CDK1	34095.45	P06493	P06493	14	0
19.5868	19.6047	19.7079	19.4157	19.6632	19.7764	19.6487	19.6885	19.5375	20.022	20.1793	19.9198	19.6347	19.5873	19.6623	19.6566	19.7836	19.8497	Homo sapiens	490	>sp|P06576|ATPB_HUMAN ATP synthase subunit beta, mitochondrial OS=Homo sapiens GN=ATP5B PE=1 SV=3	ATP5B	56559.9	P06576	P06576	29	0
19.044	19.2116	19.5285	18.9602	19.4148	19.4691	19.1617	19.5398	19.3616	20.0717	20.7041	20.0626	19.5969	19.8116	19.9772	19.8011	20.1543	20.03	Homo sapiens	491	>sp|P06703|S10A6_HUMAN Protein S100-A6 OS=Homo sapiens GN=S100A6 PE=1 SV=1	S100A6	10179.73	P06703	P06703	6	0
15.5416	15.7105	15.6189	15.6147	15.5026	15.4583	15.4004	15.5122	15.6805	15.3844	15.4374	15.2694	15.454	15.7403	15.5819	15.3085	15.5069	15.5646	Homo sapiens	492	>sp|P06730|IF4E_HUMAN Eukaryotic translation initiation factor 4E OS=Homo sapiens GN=EIF4E PE=1 SV=2	EIF4E	25097.25	P06730	P06730	5	0
20.3803	20.5299	20.7319	20.3656	20.8557	20.9982	20.8087	20.8796	20.7459	21.2707	21.5001	21.3688	21.3649	21.1178	21.2389	21.2929	21.5606	21.4458	Homo sapiens	493	>sp|P06733|ENOA_HUMAN Alpha-enolase OS=Homo sapiens GN=ENO1 PE=1 SV=2	ENO1	47168.96	P06733	P06733	42	0
13.5062	13.1601	13.0312	13.5592	13.3462	12.8048	13.1366	12.8655	13.1252	12.0181	11.7357	10.9548	11.6164	12.1051	12.2915	11.9381	11.3391	12.13	Homo sapiens	494	>sp|P06737|PYGL_HUMAN Glycogen phosphorylase, liver form OS=Homo sapiens GN=PYGL PE=1 SV=4	PYGL	97148.6	P06737	P06737	10	0
19.6563	19.7383	19.5101	19.71	19.7301	19.5202	19.6042	19.6126	19.917	19.0005	18.8775	18.7112	18.7986	18.7306	18.8954	18.6512	18.862	18.8535	Homo sapiens	495	>sp|P06744|G6PI_HUMAN Glucose-6-phosphate isomerase OS=Homo sapiens GN=GPI PE=1 SV=4	GPI	63147.12	P06744	P06744	26	0
20.4486	20.582	20.7735	20.398	20.3446	20.8637	20.4347	20.6532	20.4299	20.2419	20.2497	20.6287	20.184	20.0264	19.827	19.6713	19.8677	19.6647	Homo sapiens	496	>sp|P06748|NPM_HUMAN Nucleophosmin OS=Homo sapiens GN=NPM1 PE=1 SV=2	NPM1	32575.02	P06748	P06748	26	0
15.1669	15.014	15.0731	15.0851	15.1221	15.3337	15.143	15.224	15.0475	15.5356	15.7182	15.906	15.7679	15.2594	15.4596	15.6051	15.6338	15.3945	Homo sapiens	497	>sp|P06753|TPM3_HUMAN Tropomyosin alpha-3 chain OS=Homo sapiens GN=TPM3 PE=1 SV=2	TPM3	32949.97	P06753	P06753	9	0
14.3007	14.1633	14.2238	14.4794	14.9171	14.7937	14.9632	14.6813	14.7625	15.6754	16.1341	15.743	15.7803	15.6398	15.7366	15.7331	15.9528	15.9781	Homo sapiens	498	>sp|P06756|ITAV_HUMAN Integrin alpha-V OS=Homo sapiens GN=ITGAV PE=1 SV=2	ITGAV	116037.86	P06756	P06756	23	0
9.19058	10.4009	9.30017	10.016	11.138	9.24285	9.74482	10.1941	9.47834	10.0738	10.0246	10.4198	11.4833	11.6219	11.7533	10.6784	10.4343	9.98507	Homo sapiens	499	>sp|P06865|HEXA_HUMAN Beta-hexosaminidase subunit alpha OS=Homo sapiens GN=HEXA PE=1 SV=2	HEXA	60702.83	P06865	P06865	5	0
11.8643	11.9006	11.2093	13.1928	13.1201	11.6347	11.5829	12.3608	7.69449	12.6039	12.1035	11.6684	11.5537	11.5756	11.8856	12.1087	11.7595	12.2984	Homo sapiens	500	>sp|P06899|H2B1J_HUMAN Histone H2B type 1-J OS=Homo sapiens GN=HIST1H2BJ PE=1 SV=3;>sp|P23527|H2B1O_HUMAN Histone H2B type 1-O OS=Homo sapiens GN=HIST1H2BO PE=1 SV=3;>sp|P33778|H2B1B_HUMAN Histone H2B type 1-B OS=Homo sapiens GN=HIST1H2BB PE=1 SV=2;>sp|Q16778|H2B2E_HUMAN Histone H2B type 2-E OS=Homo sapiens GN=HIST2H2BE PE=1 SV=3	HIST1H2BJ;HIST1H2BO;HIST1H2BB;HIST2H2BE	13904.16;13906.13;13950.19;13920.16	P06899;P23527;P33778;Q16778	P06899;P23527;P33778;Q16778	2	0
19.1823	19.2658	19.1608	19.2093	19.242	19.0553	19.1009	19.1679	19.289	18.9575	18.8243	18.5944	18.6528	18.9331	18.7854	18.6487	18.5068	18.8819	Homo sapiens	501	>sp|P07195|LDHB_HUMAN L-lactate dehydrogenase B chain OS=Homo sapiens GN=LDHB PE=1 SV=2	LDHB	36638.48	P07195	P07195	17	0
10.2375	10.2067	10.1254	10.0892	9.45432	10.3604	9.3583	9.7073	9.46763	11.4875	11.8813	11.1227	11.194	10.5012	10.5497	9.81414	8.58747	10.0605	Homo sapiens	502	>sp|P07203|GPX1_HUMAN Glutathione peroxidase 1 OS=Homo sapiens GN=GPX1 PE=1 SV=4	GPX1	22088.17	P07203	P07203	5	0
11.181	11.5664	11.279	12.7614	12.4159	12.4298	12.1127	11.1787	13.5925	11.8307	12.2714	10.8768	11.896	12.7993	12.1474	11.3236	11.0054	12.539	Homo sapiens	503	>sp|P07205|PGK2_HUMAN Phosphoglycerate kinase 2 OS=Homo sapiens GN=PGK2 PE=1 SV=3	PGK2	44796.11	P07205	P07205	3	0
18.467	18.5645	18.7532	18.5141	18.9871	18.9936	18.9391	18.9143	18.9121	19.3354	19.7208	19.4197	19.5134	19.3446	19.4622	19.5703	19.7423	19.7315	Homo sapiens	504	>sp|P07237|PDIA1_HUMAN Protein disulfide-isomerase OS=Homo sapiens GN=P4HB PE=1 SV=3	P4HB	57116.36	P07237	P07237	46	0
13.09	13.3688	12.9837	13.3657	13.8591	12.3775	13.2934	13.1282	13.6066	11.3405	11.0095	10.5758	10.2361	10.6319	10.2543	11.1186	10.9291	11.8027	Homo sapiens	505	>sp|P07305|H10_HUMAN Histone H1.0 OS=Homo sapiens GN=H1F0 PE=1 SV=3	H1F0	20862.93	P07305	P07305	4	0
7.60271	8.51732	8.80107	9.20789	8.53881	9.39656	9.69921	9.03463	6.44514	10.1142	10.8025	10.2662	11.1035	10.3281	10.8576	10.686	10.4473	10.617	Homo sapiens	506	>sp|P07311|ACYP1_HUMAN Acylphosphatase-1 OS=Homo sapiens GN=ACYP1 PE=1 SV=2	ACYP1	11260.84	P07311	P07311	3	0
12.7629	12.4411	13.1007	14.6451	14.4984	14.9919	14.7558	14.9006	14.4097	13.9012	14.2012	13.0725	15.6317	15.6375	16.0837	14.586	14.7739	15.2095	Homo sapiens	507	>sp|P07339|CATD_HUMAN Cathepsin D OS=Homo sapiens GN=CTSD PE=1 SV=1	CTSD	44552.22	P07339	P07339	6	0
20.3426	20.4489	20.3626	20.3724	20.6926	20.6681	20.6735	20.727	20.6805	20.8283	21.1444	20.9704	21.1506	20.9461	21.0184	21.0062	21.1269	21.1125	Homo sapiens	508	>sp|P07355|ANXA2_HUMAN Annexin A2 OS=Homo sapiens GN=ANXA2 PE=1 SV=2	ANXA2	38604.04	P07355	P07355	47	0
13.6102	13.8322	14.0878	13.686	13.9109	13.2035	13.0284	13.117	13.5336	13.5137	12.8014	13.0236	13.4646	13.306	13.2372	12.7152	12.7536	13.0164	Homo sapiens	509	>sp|P07384|CAN1_HUMAN Calpain-1 catalytic subunit OS=Homo sapiens GN=CAPN1 PE=1 SV=1	CAPN1	81890.05	P07384	P07384	12	0
19.2178	19.1789	18.8769	19.2841	19.1959	19.2668	18.9914	19.1436	18.9718	18.3518	18.5944	18.0016	18.3093	18.8001	18.5329	18.4445	18.5095	18.9702	Homo sapiens	510	>sp|P07437|TBB5_HUMAN Tubulin beta chain OS=Homo sapiens GN=TUBB PE=1 SV=2	TUBB	49670.81	P07437	P07437	9	0
9.541	10.52	8.95294	11.423	11.9283	11.0167	11.8616	10.9311	11.7776	9.10842	11.9737	10.3626	11.9278	11.7645	11.3994	12.9852	13.047	13.6412	Homo sapiens	511	>sp|P07602|SAP_HUMAN Prosaposin OS=Homo sapiens GN=PSAP PE=1 SV=2	PSAP	58112.64	P07602	P07602	4	0
14.8494	15.2433	15.3685	16.5314	16.9907	16.895	16.2453	16.3573	16.5601	13.91	14.0474	13.9379	17.4935	17.3788	17.3215	17.3833	17.8899	17.7921	Homo sapiens	512	>sp|P07711|CATL1_HUMAN Cathepsin L1 OS=Homo sapiens GN=CTSL PE=1 SV=2	CTSL	37564.13	P07711	P07711	8	0
18.2692	18.5223	18.4423	18.4734	18.7859	18.905	19.0066	18.8075	18.5941	18.8402	19.0583	18.9678	19.3416	19.1945	19.1285	19.3665	19.4353	19.5219	Homo sapiens	513	>sp|P07737|PROF1_HUMAN Profilin-1 OS=Homo sapiens GN=PFN1 PE=1 SV=2	PFN1	15054.23	P07737	P07737	9	0
13.4616	13.7594	13.6953	13.6387	13.8943	13.7082	13.6303	13.7858	12.9866	13.2094	13.5528	13.5345	13.9897	13.7199	13.8841	13.7163	13.7605	13.5557	Homo sapiens	514	>sp|P07738|PMGE_HUMAN Bisphosphoglycerate mutase OS=Homo sapiens GN=BPGM PE=1 SV=2	BPGM	30005.21	P07738	P07738	10	0
12.285	12.1803	12.4522	12.3841	12.6446	12.475	12.4622	12.4887	12.0344	11.6787	12.0823	13.0446	13.3076	13.3714	12.7928	13.1673	13.306	12.6193	Homo sapiens	515	>sp|P07741|APT_HUMAN Adenine phosphoribosyltransferase OS=Homo sapiens GN=APRT PE=1 SV=2	APRT	19607.76	P07741	P07741	3	0
17.1414	17.2754	17.0179	17.243	17.0893	16.8458	16.9676	17.0332	17.2072	15.9374	15.8197	15.9971	16.001	16.3064	16.1603	16.0531	15.9094	15.8561	Homo sapiens	516	>sp|P07814|SYEP_HUMAN Bifunctional glutamate/proline--tRNA ligase OS=Homo sapiens GN=EPRS PE=1 SV=5	EPRS	170590.89	P07814	P07814	49	0
18.9289	19.0073	18.901	18.8971	19.0479	18.8603	18.875	18.975	19.0505	18.516	18.3432	18.4048	18.5012	18.7742	18.5288	18.7836	18.8648	18.9579	Homo sapiens	517	>sp|P07900|HS90A_HUMAN Heat shock protein HSP 90-alpha OS=Homo sapiens GN=HSP90AA1 PE=1 SV=5	HSP90AA1	84659.71	P07900	P07900	41	0
17.3868	18.5802	19.0048	17.4945	17.1998	18.5575	16.8316	17.687	17.4455	17.8684	18.0459	17.2607	17.8039	17.713	17.2576	17.1684	17.0263	18.2945	Homo sapiens	518	>sp|P07910|HNRPC_HUMAN Heterogeneous nuclear ribonucleoproteins C1/C2 OS=Homo sapiens GN=HNRNPC PE=1 SV=4	HNRNPC	33670	P07910	P07910	25	0
13.1263	13.2169	13.1706	13.3116	13.0389	13.3751	13.5599	13.6124	13.7789	13.883	14.5939	13.9326	14.6025	14.1534	14.5335	14.2787	14.0852	14.3322	Homo sapiens	519	>sp|P07942|LAMB1_HUMAN Laminin subunit beta-1 OS=Homo sapiens GN=LAMB1 PE=1 SV=2	LAMB1	198038.36	P07942	P07942	8	0
7.16294	7.81587	7.80747	7.78727	7.51452	6.6515	6.42425	7.99535	9.0449	6.82425	8.69107	9.32015	6.44011	8.26126	7.80016	9.48305	9.36118	7.41014	Homo sapiens	520	>sp|P07947|YES_HUMAN Tyrosine-protein kinase Yes OS=Homo sapiens GN=YES1 PE=1 SV=3	YES1	60801.23	P07947	P07947	1	0
16.8322	17.0865	16.9281	16.8721	16.9258	16.8114	16.689	16.9088	17.0169	17.0269	16.9754	16.6782	16.3972	16.7189	16.7648	16.4623	16.6104	16.6525	Homo sapiens	522	>sp|P07954|FUMH_HUMAN Fumarate hydratase, mitochondrial OS=Homo sapiens GN=FH PE=1 SV=3	FH	54636.99	P07954	P07954	21	0
12.4584	12.1621	12.277	12.1118	12.1259	11.5334	11.3278	11.3778	11.7183	9.35684	8.44243	10.5627	11.2332	11.3869	10.5076	8.97179	12.7727	10.0117	Homo sapiens	523	>sp|P07996|TSP1_HUMAN Thrombospondin-1 OS=Homo sapiens GN=THBS1 PE=1 SV=2	THBS1	129382.66	P07996	P07996	4	0
14.2192	14.1393	14.2697	14.1984	14.7708	14.5766	14.6548	14.6517	14.4604	14.6706	14.8333	15.0847	15.2704	14.9451	14.9754	15.3388	15.3231	15.1306	Homo sapiens	524	>sp|P08133|ANXA6_HUMAN Annexin A6 OS=Homo sapiens GN=ANXA6 PE=1 SV=3	ANXA6	75873.27	P08133	P08133	34	0
15.4408	15.7994	15.7501	15.7063	15.965	15.6985	15.9637	16.1964	15.2789	16.9302	16.8277	16.3667	16.6982	17.3643	17.5441	16.4239	16.4868	16.4546	Homo sapiens	525	>sp|P08134|RHOC_HUMAN Rho-related GTP-binding protein RhoC OS=Homo sapiens GN=RHOC PE=1 SV=1	RHOC	22006.36	P08134	P08134	6	0
14.0153	14.8798	14.108	14.212	15.1176	14.2426	14.4449	15.2199	14.7737	14.1852	14.1755	13.6395	14.301	14.6464	14.3696	14.1909	14.3217	14.9013	Homo sapiens	526	>sp|P08183|MDR1_HUMAN Multidrug resistance protein 1 OS=Homo sapiens GN=ABCB1 PE=1 SV=3	ABCB1	141478.51	P08183	P08183	19	0
16.1752	16.4375	16.1785	16.3542	16.7066	16.5351	16.6577	16.6822	16.6132	16.3502	16.5132	16.4769	16.4767	16.4167	16.2998	16.9446	17.0231	17.0855	Homo sapiens	527	>sp|P08195|4F2_HUMAN 4F2 cell-surface antigen heavy chain OS=Homo sapiens GN=SLC3A2 PE=1 SV=3	SLC3A2	67994	P08195	P08195	13	0
12.5566	13.0728	13.1344	12.9179	12.9312	13.4623	12.4117	12.7958	13.053	13.7383	13.7878	13.5067	13.8612	14.0023	14.4545	13.107	13.8785	13.2263	Homo sapiens	528	>sp|P08236|BGLR_HUMAN Beta-glucuronidase OS=Homo sapiens GN=GUSB PE=1 SV=2	GUSB	74731.94	P08236	P08236	3	0.000342818
15.0728	15.1522	14.8331	15.126	15.4699	14.707	14.9246	15.0427	15.3703	14.0516	13.6493	13.7894	13.4748	14.2385	13.9774	13.6538	13.575	13.5547	Homo sapiens	529	>sp|P08237|PFKAM_HUMAN ATP-dependent 6-phosphofructokinase, muscle type OS=Homo sapiens GN=PFKM PE=1 SV=2	PFKM	85182.52	P08237	P08237	14	0
20.9942	21.0168	20.8763	21.0368	21.0268	20.8041	20.8476	20.9567	21.0296	20.4575	20.156	20.2417	20.2902	20.6226	20.4063	20.5135	20.5537	20.6487	Homo sapiens	530	>sp|P08238|HS90B_HUMAN Heat shock protein HSP 90-beta OS=Homo sapiens GN=HSP90AB1 PE=1 SV=4	HSP90AB1	83264.19	P08238	P08238	72	0
13.8326	13.1333	13.0138	13.5299	13.4821	13.2884	12.9428	13.2943	12.9056	13.5024	13.4991	13.3999	12.7821	14.0523	13.4514	13.4891	13.3386	13.4805	Homo sapiens	531	>sp|P08240|SRPRA_HUMAN Signal recognition particle receptor subunit alpha OS=Homo sapiens GN=SRPRA PE=1 SV=2	SRPRA	69811.17	P08240	P08240	9	0
14.7834	14.7829	14.6269	15.0207	15.0156	14.7664	14.8272	14.8726	15.0225	13.2755	13.071	13.3607	13.6473	14.213	13.8657	13.6009	13.5142	13.4345	Homo sapiens	532	>sp|P08243|ASNS_HUMAN Asparagine synthetase [glutamine-hydrolyzing] OS=Homo sapiens GN=ASNS PE=1 SV=4	ASNS	64369.92	P08243	P08243	13	0
13.1968	12.8353	12.5219	13.1596	13.4361	13.5015	13.1989	12.6569	12.9701	13.5623	14.3624	13.9343	13.718	13.694	13.6887	13.4308	13.469	13.4953	Homo sapiens	533	>sp|P08397|HEM3_HUMAN Porphobilinogen deaminase OS=Homo sapiens GN=HMBS PE=1 SV=2	HMBS	39330.06	P08397	P08397	7	0
11.258	12.0988	11.6599	12.7908	12.7949	11.903	12.4254	11.241	12.1977	7.98938	11.142	10.0974	11.0007	11.6364	11.6566	13.0963	13.0235	12.1901	Homo sapiens	534	>sp|P08476|INHBA_HUMAN Inhibin beta A chain OS=Homo sapiens GN=INHBA PE=1 SV=2	INHBA	47442.27	P08476	P08476	2	0
15.6807	15.8406	15.8754	15.5652	15.777	15.8154	15.6047	15.7676	15.6101	15.772	16.2058	15.9009	15.6987	15.7124	15.8285	15.663	15.7605	15.6768	Homo sapiens	535	>sp|P08559|ODPA_HUMAN Pyruvate dehydrogenase E1 component subunit alpha, somatic form, mitochondrial OS=Homo sapiens GN=PDHA1 PE=1 SV=3	PDHA1	43295.62	P08559	P08559	14	0
7.94769	6.20422	5.99252	10.2372	11.7206	12.033	9.66605	6.62069	10.4585	10.8537	11.167	9.40149	12.3295	11.5908	12.3748	11.7723	10.9673	12.564	Homo sapiens	536	>sp|P08574|CY1_HUMAN Cytochrome c1, heme protein, mitochondrial OS=Homo sapiens GN=CYC1 PE=1 SV=3	CYC1	35421.97	P08574	P08574	3	0
12.6652	12.7479	12.7684	12.5972	12.7787	12.4863	12.6731	12.5421	12.8049	12.8668	12.8876	12.8529	12.291	12.7408	13.3385	13.1955	13.6059	12.6023	Homo sapiens	537	>sp|P08579|RU2B_HUMAN U2 small nuclear ribonucleoprotein B'' OS=Homo sapiens GN=SNRPB2 PE=1 SV=1	SNRPB2	25486.33	P08579	P08579	3	0
10.8427	9.80772	10.7422	10.8245	10.9655	9.99903	10.7838	10.7442	10.4609	11.5205	10.7334	10.5184	11.3647	11.9742	11.8312	11.4752	11.5036	11.9362	Homo sapiens	538	>sp|P08581|MET_HUMAN Hepatocyte growth factor receptor OS=Homo sapiens GN=MET PE=1 SV=4	MET	155541.3	P08581	P08581	5	0
17.5165	18.1269	18.2335	17.6233	17.672	17.7616	17.4419	17.8456	17.6472	18.2024	18.2609	17.8296	17.8381	18.1325	18.3022	18.0608	18.0061	18.1186	Homo sapiens	539	>sp|P08621|RU17_HUMAN U1 small nuclear ribonucleoprotein 70 kDa OS=Homo sapiens GN=SNRNP70 PE=1 SV=2	SNRNP70	51556.68	P08621	P08621	21	0
13.7385	13.9343	13.9278	13.2204	13.2322	14.5528	13.8329	14.187	13.5663	11.4293	11.0327	12.9726	14.2781	13.9963	13.0867	13.995	14.4008	13.5068	Homo sapiens	540	>sp|P08648|ITA5_HUMAN Integrin alpha-5 OS=Homo sapiens GN=ITGA5 PE=1 SV=2	ITGA5	114536.49	P08648	P08648	1	0
18.8352	19.3337	20.4878	18.5111	15.7609	19.8537	16.2699	17.2767	17.4662	18.8136	18.6081	18.7363	18.1105	18.2066	17.7232	16.5888	16.5529	16.9807	Homo sapiens	541	>sp|P08670|VIME_HUMAN Vimentin OS=Homo sapiens GN=VIM PE=1 SV=4	VIM	53651.68	P08670	P08670	48	0
15.9561	15.9657	15.8569	16.0214	15.8006	15.6127	15.533	15.7639	15.6343	14.9649	14.6137	14.6964	14.6474	15.0065	14.9496	14.6918	14.617	14.6247	Homo sapiens	542	>sp|P08708|RS17_HUMAN 40S ribosomal protein S17 OS=Homo sapiens GN=RPS17 PE=1 SV=2	RPS17	15550.12	P08708	P08708	15	0
13.4021	13.886	13.2372	13.6499	14.2004	13.7494	12.9475	13.8629	13.0271	13.0033	13.3845	13.2811	13.5686	13.4075	13.0977	13.7586	13.5047	13.9348	Homo sapiens	543	>sp|P08754|GNAI3_HUMAN Guanine nucleotide-binding protein G(k) subunit alpha OS=Homo sapiens GN=GNAI3 PE=1 SV=3	GNAI3	40532.19	P08754	P08754	1	0
17.7343	17.9848	18.1606	17.893	18.3087	18.3947	18.1483	18.2172	18.1135	18.414	18.9498	18.7592	18.8272	18.7912	18.7305	18.9338	19.1697	19.0532	Homo sapiens	544	>sp|P08758|ANXA5_HUMAN Annexin A5 OS=Homo sapiens GN=ANXA5 PE=1 SV=2	ANXA5	35936.76	P08758	P08758	24	0
16.5121	16.6827	16.4343	16.6583	16.4574	16.6011	16.5894	16.6806	16.3993	17.1598	17.2064	17.3278	16.5517	16.587	16.4085	16.5958	16.7352	16.6817	Homo sapiens	545	>sp|P08865|RSSA_HUMAN 40S ribosomal protein SA OS=Homo sapiens GN=RPSA PE=1 SV=4	RPSA	32854.07	P08865	P08865	21	0
13.6802	13.7343	13.5323	14.2941	14.4666	14.5652	14.7331	14.3721	14.5179	13.7849	13.8465	13.4889	15.1782	15.1504	14.9351	15.1188	15.0507	15.6407	Homo sapiens	546	>sp|P08962|CD63_HUMAN CD63 antigen OS=Homo sapiens GN=CD63 PE=1 SV=2	CD63	25636.6	P08962	P08962	2	0
10.8336	11.1483	10.7502	12.9671	9.71699	11.1278	10.9626	10.6475	11.178	10.9276	10.4129	8.78617	12.2912	11.421	12.0253	10.8782	9.86276	12.0853	Homo sapiens	547	>sp|P09001|RM03_HUMAN 39S ribosomal protein L3, mitochondrial OS=Homo sapiens GN=MRPL3 PE=1 SV=1	MRPL3	38632.61	P09001	P09001	2	0
15.4507	15.7175	15.5163	15.1028	15.8389	15.424	15.6433	15.662	15.7491	16.7241	16.9465	16.3268	16.6062	16.5517	16.4888	16.5357	16.6043	17.1686	Homo sapiens	548	>sp|P09012|SNRPA_HUMAN U1 small nuclear ribonucleoprotein A OS=Homo sapiens GN=SNRPA PE=1 SV=3	SNRPA	31279.53	P09012	P09012	9	0
13.2525	13.0387	13.1695	13.4116	13.6097	13.5847	13.808	13.3338	13.6189	13.9247	13.5238	13.9301	13.85	13.3842	13.5892	13.5777	13.7688	13.4953	Homo sapiens	549	>sp|P09104|ENOG_HUMAN Gamma-enolase OS=Homo sapiens GN=ENO2 PE=1 SV=3	ENO2	47268.57	P09104	P09104	8	0
9.63814	8.14445	9.88645	9.91703	10.0861	10.2629	10.2002	9.75988	10.0896	10.648	11.3098	10.7741	11.3487	10.7233	10.8591	11.3148	10.9277	11.5029	Homo sapiens	550	>sp|P09110|THIK_HUMAN 3-ketoacyl-CoA thiolase, peroxisomal OS=Homo sapiens GN=ACAA1 PE=1 SV=2	ACAA1	44291.98	P09110	P09110	5	0
15.505	15.6728	15.5291	15.8293	15.8024	15.8181	15.5136	15.6542	15.733	16.3162	16.521	16.425	16.376	16.2035	16.1982	16.3009	16.3122	16.3917	Homo sapiens	551	>sp|P09211|GSTP1_HUMAN Glutathione S-transferase P OS=Homo sapiens GN=GSTP1 PE=1 SV=2	GSTP1	23355.83	P09211	P09211	10	0
12.1726	15.3941	15.3387	17.7983	14.6856	14.578	13.6174	13.6314	13.7617	16.3392	16.0668	15.6342	15.7376	18.2598	17.8993	18.5182	15.5146	16.6847	Homo sapiens	552	>sp|P09234|RU1C_HUMAN U1 small nuclear ribonucleoprotein C OS=Homo sapiens GN=SNRPC PE=1 SV=1	SNRPC	17393.66	P09234	P09234	2	0
18.1119	18.2701	18.4205	18.0434	17.9281	18.2012	17.7141	18.3879	17.8636	19.2091	19.0504	18.831	18.0435	18.3647	18.6062	17.9977	18.1919	17.9915	Homo sapiens	553	>sp|P09382|LEG1_HUMAN Galectin-1 OS=Homo sapiens GN=LGALS1 PE=1 SV=2	LGALS1	14715.7	P09382	P09382	12	0
13.8941	13.8701	13.9423	13.893	14.3306	14.3191	14.1703	14.1593	13.8928	14.3075	14.6492	14.4139	14.7055	14.3756	14.5441	14.582	14.7128	14.7083	Homo sapiens	554	>sp|P09417|DHPR_HUMAN Dihydropteridine reductase OS=Homo sapiens GN=QDPR PE=1 SV=2	QDPR	25789.5	P09417	P09417	4	0
17.8797	17.982	17.8843	17.8834	18.1348	17.9147	18.2319	18.1146	18.0337	19.0409	19.1156	19.0831	18.5993	18.317	18.8255	19.3741	19.527	19.0784	Homo sapiens	555	>sp|P09429|HMGB1_HUMAN High mobility group protein B1 OS=Homo sapiens GN=HMGB1 PE=1 SV=3	HMGB1	24893.76	P09429	P09429	20	0
17.321	17.2792	17.5422	16.9896	17.2962	17.7037	17.2307	17.579	17.0194	18.2784	18.2121	18.1694	17.6782	17.2626	17.8163	17.131	17.3824	16.9867	Homo sapiens	556	>sp|P09493|TPM1_HUMAN Tropomyosin alpha-1 chain OS=Homo sapiens GN=TPM1 PE=1 SV=2	TPM1	32708.56	P09493	P09493	25	0
13.9431	14.9049	14.8775	14.1284	14.2982	14.6361	14.0612	14.7363	14.5053	14.7815	15.4167	14.7699	14.5693	14.6342	14.9978	15.0296	15.0772	14.9865	Homo sapiens	557	>sp|P09496|CLCA_HUMAN Clathrin light chain A OS=Homo sapiens GN=CLTA PE=1 SV=1	CLTA	27076.69	P09496	P09496	4	0
12.9902	13.1871	13.2068	13.2245	12.4479	12.8734	12.8581	13.091	11.1389	13.8896	14.3525	13.3795	13.8663	13.7166	13.42	12.7196	13.2165	14.081	Homo sapiens	558	>sp|P09497|CLCB_HUMAN Clathrin light chain B OS=Homo sapiens GN=CLTB PE=1 SV=1	CLTB	25190.49	P09497	P09497	6	0
17.0728	17.3558	17.3625	17.2267	17.5705	17.5685	17.5649	17.4395	17.4908	17.7539	18.1813	18.135	18.3143	18.0048	18.1398	18.1336	18.2721	18.0553	Homo sapiens	559	>sp|P09525|ANXA4_HUMAN Annexin A4 OS=Homo sapiens GN=ANXA4 PE=1 SV=4	ANXA4	35882.71	P09525	P09525	26	0
14.7091	14.8457	15.0855	14.6494	14.6694	15.0242	14.7158	14.8793	14.6364	15.5251	15.7872	15.9149	15.796	15.8987	15.7484	15.5131	15.5933	15.3934	Homo sapiens	560	>sp|P09543|CN37_HUMAN 2',3'-cyclic-nucleotide 3'-phosphodiesterase OS=Homo sapiens GN=CNP PE=1 SV=2	CNP	47578.62	P09543	P09543	11	0
8.60244	7.7862	5.82278	8.68421	8.34594	5.71779	9.13235	7.22662	7.61235	8.32988	8.87985	8.23863	7.91308	7.41846	8.46122	11.4213	11.1998	10.8813	Homo sapiens	561	>sp|P09601|HMOX1_HUMAN Heme oxygenase 1 OS=Homo sapiens GN=HMOX1 PE=1 SV=1	HMOX1	32818.6	P09601	P09601	4	0
14.0025	13.6413	14.7029	14.2917	14.6606	14.9805	14.1918	14.2879	14.3522	15.696	16.1065	16.0641	16.5741	16.4838	16.2497	15.5926	16.1649	15.9951	Homo sapiens	562	>sp|P09622|DLDH_HUMAN Dihydrolipoyl dehydrogenase, mitochondrial OS=Homo sapiens GN=DLD PE=1 SV=2	DLD	54177.25	P09622	P09622	16	0
18.1505	18.624	18.672	18.181	17.9213	18.4224	17.8397	18.0107	18.148	17.7967	17.8657	17.5338	17.4915	17.5016	17.2028	17.4001	17.4166	17.9994	Homo sapiens	563	>sp|P09651|ROA1_HUMAN Heterogeneous nuclear ribonucleoprotein A1 OS=Homo sapiens GN=HNRNPA1 PE=1 SV=5	HNRNPA1	38746.65	P09651	P09651	32	0
14.3858	14.4704	14.3294	14.5378	14.3204	14.595	14.3993	14.0452	14.6568	14.4767	14.6268	14.7024	14.4124	14.1537	14.3923	14.6473	14.94	14.5337	Homo sapiens	564	>sp|P09661|RU2A_HUMAN U2 small nuclear ribonucleoprotein A' OS=Homo sapiens GN=SNRPA1 PE=1 SV=2	SNRPA1	28415.56	P09661	P09661	12	0
13.0589	12.6099	13.668	11.326	10.6554	11.6923	10.86	10.5971	10.364	12.0493	12.0619	12.4456	13.2607	13.3902	12.3591	11.8207	12.2976	12.6355	Homo sapiens	565	>sp|P09669|COX6C_HUMAN Cytochrome c oxidase subunit 6C OS=Homo sapiens GN=COX6C PE=1 SV=2	COX6C	8781.43	P09669	P09669	3	0
13.9762	14.4966	15.1129	13.9514	13.1728	15.0194	13.2704	13.7673	13.1845	15.401	15.4929	14.8222	15.4045	15.2002	14.5318	13.3704	13.0437	14.6024	Homo sapiens	566	>sp|P09874|PARP1_HUMAN Poly [ADP-ribose] polymerase 1 OS=Homo sapiens GN=PARP1 PE=1 SV=4	PARP1	113083.79	P09874	P09874	25	0
10.4612	10.0535	10.4478	10.7606	10.2264	10.9	10.4391	10.1422	10.7625	7.88292	7.56706	10.1935	9.34874	9.85522	8.79111	9.76609	9.75658	8.10374	Homo sapiens	567	>sp|P09884|DPOLA_HUMAN DNA polymerase alpha catalytic subunit OS=Homo sapiens GN=POLA1 PE=1 SV=2	POLA1	165912.76	P09884	P09884	1	0
14.1335	14.2289	14.141	14.3512	14.3781	14.0246	14.2478	14.2479	14.5843	13.9334	13.8544	13.5361	13.6459	14.2589	14.0758	13.6247	13.6495	13.8715	Homo sapiens	568	>sp|P09960|LKHA4_HUMAN Leukotriene A-4 hydrolase OS=Homo sapiens GN=LTA4H PE=1 SV=2	LTA4H	69285.27	P09960	P09960	11	0
7.73081	6.76062	6.78923	6.62704	8.42001	8.86465	9.03441	8.22762	7.00095	8.81519	10.1672	8.8806	9.90983	6.83629	9.42493	9.09612	9.68095	8.94727	Homo sapiens	569	>sp|P09972|ALDOC_HUMAN Fructose-bisphosphate aldolase C OS=Homo sapiens GN=ALDOC PE=1 SV=2	ALDOC	39455.86	P09972	P09972	4	0
12.1656	12.0107	11.6474	12.3321	11.7722	11.0193	11.9158	11.7356	11.6948	12.0405	11.7025	9.98792	10.9602	11.819	12.193	11.127	10.4423	11.8649	Homo sapiens	570	>sp|P0C0S5|H2AZ_HUMAN Histone H2A.Z OS=Homo sapiens GN=H2AFZ PE=1 SV=2;>sp|Q71UI9|H2AV_HUMAN Histone H2A.V OS=Homo sapiens GN=H2AFV PE=1 SV=3	H2AFZ;H2AFV	13552.73;13508.68	P0C0S5;Q71UI9	P0C0S5;Q71UI9	1	0
13.0772	13.698	13.6997	12.5623	14.1241	11.8121	12.7213	13.7418	13.3417	13.3968	14.4627	12.61	12.5825	13.4615	12.6621	12.2491	13.6357	14.622	Homo sapiens	571	>sp|P0C0S8|H2A1_HUMAN Histone H2A type 1 OS=Homo sapiens GN=HIST1H2AG PE=1 SV=2;>sp|Q16777|H2A2C_HUMAN Histone H2A type 2-C OS=Homo sapiens GN=HIST2H2AC PE=1 SV=4;>sp|Q6FI13|H2A2A_HUMAN Histone H2A type 2-A OS=Homo sapiens GN=HIST2H2AA3 PE=1 SV=3;>sp|Q93077|H2A1C_HUMAN Histone H2A type 1-C OS=Homo sapiens GN=HIST1H2AC PE=1 SV=3;>sp|Q96KK5|H2A1H_HUMAN Histone H2A type 1-H OS=Homo sapiens GN=HIST1H…	HIST1H2AG;HIST2H2AC;HIST2H2AA3;HIST1H2AC;HIST1H2AH;HIST1H2AJ;H2AFJ	14091.48;13988.37;14095.48;14105.46;13906.25;13936.28;14019.41	P0C0S8;Q16777;Q6FI13;Q93077;Q96KK5;Q99878;Q9BTM1	P0C0S8;Q16777;Q6FI13;Q93077;Q96KK5;Q99878;Q9BTM1	1	0.000674992
12.562	12.3497	13.0569	12.613	12.2586	9.57426	11.3891	12.4327	6.94457	11.738	11.8466	12.3005	14.2186	14.6537	13.4182	11.9267	11.9194	12.4328	Homo sapiens	572	>sp|P0C7P4|UCRIL_HUMAN Putative cytochrome b-c1 complex subunit Rieske-like protein 1 OS=Homo sapiens GN=UQCRFS1P1 PE=5 SV=1;>sp|P47985|UCRI_HUMAN Cytochrome b-c1 complex subunit Rieske, mitochondrial OS=Homo sapiens GN=UQCRFS1 PE=1 SV=2	UQCRFS1P1;UQCRFS1	30815.37;29667.99	P0C7P4;P47985	P0C7P4;P47985	2	0
9.83108	7.34726	9.31414	9.57456	9.20156	10.4193	8.90511	9.24554	8.46135	9.39453	8.82098	10.4524	10.4806	10.5676	9.42062	10.7558	10.4764	10.375	Homo sapiens	573	>sp|P0CG29|GST2_HUMAN Glutathione S-transferase theta-2 OS=Homo sapiens GN=GSTT2 PE=1 SV=1;>sp|P0CG30|GSTT2_HUMAN Glutathione S-transferase theta-2B OS=Homo sapiens GN=GSTT2B PE=1 SV=1	GSTT2;GSTT2B	27506.05;27507	P0CG29;P0CG30	P0CG29;P0CG30	1	0.001609788
12.0051	11.7935	11.6231	12.0431	11.4081	11.4015	11.7587	11.4587	11.4461	7.09157	7.54504	9.73104	9.99459	10.1242	7.7137	9.31157	8.39566	8.78658	Homo sapiens	574	>sp|P0DJD0|RGPD1_HUMAN RANBP2-like and GRIP domain-containing protein 1 OS=Homo sapiens GN=RGPD1 PE=2 SV=1;>sp|P0DJD1|RGPD2_HUMAN RANBP2-like and GRIP domain-containing protein 2 OS=Homo sapiens GN=RGPD2 PE=2 SV=1	RGPD1;RGPD2	196661.86;197307.62	P0DJD0;P0DJD1	P0DJD0;P0DJD1	1	0.000342818
20.2549	20.5288	20.5633	20.5007	20.8964	20.8648	20.776	20.7992	20.9135	20.9193	21.1397	21.0617	21.1298	21.081	21.1077	21.8504	22.0128	21.897	Homo sapiens	575	>sp|P0DMV8|HS71A_HUMAN Heat shock 70 kDa protein 1A OS=Homo sapiens GN=HSPA1A PE=1 SV=1;>sp|P0DMV9|HS71B_HUMAN Heat shock 70 kDa protein 1B OS=Homo sapiens GN=HSPA1B PE=1 SV=1	HSPA1A;HSPA1B	70052.23;70052.23	P0DMV8;P0DMV9	P0DMV8;P0DMV9	45	0
14.7068	14.8309	15.0572	14.7596	14.9488	14.6458	14.5845	14.9423	14.8258	13.5052	13.3635	13.761	13.46	13.8263	14.3283	13.4737	13.5259	12.488	Homo sapiens	576	>sp|P0DN76|U2AF5_HUMAN Splicing factor U2AF 35 kDa subunit-like protein OS=Homo sapiens GN=U2AF1L5 PE=3 SV=1;>sp|Q01081|U2AF1_HUMAN Splicing factor U2AF 35 kDa subunit OS=Homo sapiens GN=U2AF1 PE=1 SV=3	U2AF1L5;U2AF1	27872.05;27872.05	P0DN76;Q01081	P0DN76;Q01081	5	0
7.37263	8.26942	6.82235	7.80597	9.4253	9.208	6.68615	4.32679	7.23005	8.78884	6.62013	7.84994	9.69941	6.46173	7.52305	7.06006	7.35705	7.62062	Homo sapiens	577	>sp|P0DN79|CBSL_HUMAN Cystathionine beta-synthase-like protein OS=Homo sapiens GN=CBSL PE=3 SV=1;>sp|P35520|CBS_HUMAN Cystathionine beta-synthase OS=Homo sapiens GN=CBS PE=1 SV=2	CBSL;CBS	60586.53;60586.53	P0DN79;P35520	P0DN79;P35520	1	0.00817353
14.621	14.5379	14.479	14.7249	14.4309	14.3164	14.2396	14.0883	14.6332	14.8381	14.6844	14.6813	14.5674	14.9669	14.7217	14.4286	14.3766	14.528	Homo sapiens	584	>sp|P10155|RO60_HUMAN 60 kDa SS-A/Ro ribonucleoprotein OS=Homo sapiens GN=TROVE2 PE=1 SV=2	TROVE2	60670.61	P10155	P10155	13	0
6.81662	8.23626	7.05283	6.10883	7.18021	6.74486	8.65515	7.42871	6.98008	6.41121	7.23156	7.00996	8.33294	7.59923	8.3589	6.7924	9.29481	7.46221	Homo sapiens	585	>sp|P10253|LYAG_HUMAN Lysosomal alpha-glucosidase OS=Homo sapiens GN=GAA PE=1 SV=4	GAA	105323.78	P10253	P10253	2	0.004119138
12.1957	12.2863	11.4872	12.4603	12.8928	12.3976	12.7296	12.5522	11.9145	12.1942	12.4572	11.8356	12.7099	12.6737	12.82	12.3914	12.2509	12.6832	Homo sapiens	586	>sp|P10301|RRAS_HUMAN Ras-related protein R-Ras OS=Homo sapiens GN=RRAS PE=1 SV=1	RRAS	23480.49	P10301	P10301	3	0
8.19873	7.44875	7.77009	6.99985	7.78479	8.67963	7.52482	6.39578	8.91797	8.38051	8.68913	7.09558	7.4792	8.38844	10.6295	8.74482	8.11246	7.1722	Homo sapiens	587	>sp|P10398|ARAF_HUMAN Serine/threonine-protein kinase A-Raf OS=Homo sapiens GN=ARAF PE=1 SV=2	ARAF	67585.35	P10398	P10398	1	0
18.8829	19.257	18.5738	18.8766	18.8477	18.2844	18.7415	18.8959	18.6059	17.1294	16.912	17.5014	16.4	16.6053	16.6218	16.7154	16.7715	16.1436	Homo sapiens	588	>sp|P10412|H14_HUMAN Histone H1.4 OS=Homo sapiens GN=HIST1H1E PE=1 SV=2	HIST1H1E	21865.27	P10412	P10412	17	0
9.22216	8.58734	10.0983	10.1477	10.997	10.5862	10.4005	8.96416	11.2241	11.667	9.59163	9.98251	11.5237	12.0116	12.3762	11.5451	11.8652	11.7434	Homo sapiens	589	>sp|P10415|BCL2_HUMAN Apoptosis regulator Bcl-2 OS=Homo sapiens GN=BCL2 PE=1 SV=2	BCL2	26265.89	P10415	P10415	2	0
8.78181	8.59906	7.12075	9.60098	7.08857	8.04127	7.89867	9.15675	8.28307	8.0713	6.57083	7.62557	5.15495	9.03573	6.9212	8.44744	8.35781	8.27227	Homo sapiens	590	>sp|P10451|OSTP_HUMAN Osteopontin OS=Homo sapiens GN=SPP1 PE=1 SV=1	SPP1	35422.74	P10451	P10451	1	0.001318392
13.1819	13.3064	13.8765	13.7531	13.9096	14.0967	13.5902	13.7086	13.5862	13.9201	13.9766	13.1817	13.5074	13.714	14.1276	13.4929	13.1432	13.5678	Homo sapiens	591	>sp|P10515|ODP2_HUMAN Dihydrolipoyllysine-residue acetyltransferase component of pyruvate dehydrogenase complex, mitochondrial OS=Homo sapiens GN=DLAT PE=1 SV=3	DLAT	68996.69	P10515	P10515	3	0
18.9405	18.9338	19.1923	18.9866	19.448	19.3504	19.2864	19.3938	19.2456	19.691	20.0203	19.9218	19.8848	19.7247	20.0076	20.1633	20.3844	20.0048	Homo sapiens	592	>sp|P10599|THIO_HUMAN Thioredoxin OS=Homo sapiens GN=TXN PE=1 SV=3	TXN	11737.49	P10599	P10599	9	0
8.36756	8.91801	9.23454	7.83982	7.76706	6.64193	7.3098	7.97372	7.25701	10.4225	9.94402	9.88777	9.47823	9.39794	9.76844	9.33585	8.70664	8.9864	Homo sapiens	593	>sp|P10620|MGST1_HUMAN Microsomal glutathione S-transferase 1 OS=Homo sapiens GN=MGST1 PE=1 SV=1	MGST1	17598.66	P10620	P10620	1	0
12.7439	11.7003	8.2632	12.7915	13.4962	12.5356	12.3516	13.2395	12.5003	11.1677	11.0519	12.3077	10.3702	11.3662	12.3985	15.523	15.502	12.7843	Homo sapiens	594	>sp|P10636|TAU_HUMAN Microtubule-associated protein tau OS=Homo sapiens GN=MAPT PE=1 SV=5	MAPT	78927.57	P10636	P10636	2	0.001609788
11.0253	9.89365	11.308	10.5615	11.1704	11.3619	11.4711	10.8051	10.498	12.6372	11.2354	12.295	12.4516	12.0177	12.399	12.3289	11.7704	11.5266	Homo sapiens	595	>sp|P10644|KAP0_HUMAN cAMP-dependent protein kinase type I-alpha regulatory subunit OS=Homo sapiens GN=PRKAR1A PE=1 SV=1	PRKAR1A	42981.69	P10644	P10644	6	0
15.2802	15.1545	15.23	15.3704	15.4371	15.39	15.4353	15.272	15.2413	14.9032	15.0435	14.7649	15.8638	15.3265	15.5611	15.2949	15.5044	15.6421	Homo sapiens	596	>sp|P10768|ESTD_HUMAN S-formylglutathione hydrolase OS=Homo sapiens GN=ESD PE=1 SV=2	ESD	31462.79	P10768	P10768	9	0
20.36	20.4858	20.0771	20.4345	20.6168	20.3355	20.6572	20.6683	20.6034	20.8619	21.0585	20.9575	20.6142	20.573	20.4634	20.8603	21.0713	21.0986	Homo sapiens	597	>sp|P10809|CH60_HUMAN 60 kDa heat shock protein, mitochondrial OS=Homo sapiens GN=HSPD1 PE=1 SV=2	HSPD1	61054.63	P10809	P10809	50	0
19.4653	19.5333	19.6946	19.3673	19.6853	19.7185	19.6434	19.6466	19.6197	19.9026	20.0858	19.9433	19.6359	19.447	19.6522	19.895	20.0874	19.9313	Homo sapiens	598	>sp|P11021|GRP78_HUMAN 78 kDa glucose-regulated protein OS=Homo sapiens GN=HSPA5 PE=1 SV=2	HSPA5	72332.96	P11021	P11021	70	0
6.74589	7.89701	6.94676	5.65296	9.53194	8.61227	8.63295	8.35969	7.88637	10.3954	9.52749	10.1687	9.12441	8.50126	10.0149	10.0231	10.2684	8.73637	Homo sapiens	599	>sp|P11117|PPAL_HUMAN Lysosomal acid phosphatase OS=Homo sapiens GN=ACP2 PE=1 SV=3	ACP2	48344.27	P11117	P11117	1	0
20.0544	20.1953	20.2269	20.1479	20.3507	20.537	20.3759	20.4029	20.3585	20.4455	20.7133	20.7613	20.7711	20.5372	20.5118	20.7738	20.9742	20.8346	Homo sapiens	600	>sp|P11142|HSP7C_HUMAN Heat shock cognate 71 kDa protein OS=Homo sapiens GN=HSPA8 PE=1 SV=1	HSPA8	70898.09	P11142	P11142	66	0
7.48226	7.99013	8.11962	8.61827	9.20566	7.33053	8.71993	8.86428	8.55356	9.66513	9.49451	8.42538	9.41423	9.6633	9.76455	9.90799	10.0644	10.9149	Homo sapiens	601	>sp|P11166|GTR1_HUMAN Solute carrier family 2, facilitated glucose transporter member 1 OS=Homo sapiens GN=SLC2A1 PE=1 SV=2	SLC2A1	54083.77	P11166	P11166	5	0
13.494	13.1063	13.0739	13.2064	12.9222	13.0707	13.3769	12.916	13.4177	12.872	13.4735	13.4535	13.6132	13.5513	13.3093	13.3008	13.2123	13.2488	Homo sapiens	602	>sp|P11172|UMPS_HUMAN Uridine 5'-monophosphate synthase OS=Homo sapiens GN=UMPS PE=1 SV=1	UMPS	52221.56	P11172	P11172	12	0
12.7088	12.6058	12.6526	12.948	12.795	12.8114	12.662	12.8319	13.0386	12.8323	12.5657	12.409	12.3157	12.5412	12.3305	12.118	12.0163	12.4551	Homo sapiens	603	>sp|P11177|ODPB_HUMAN Pyruvate dehydrogenase E1 component subunit beta, mitochondrial OS=Homo sapiens GN=PDHB PE=1 SV=3	PDHB	39233.39	P11177	P11177	7	0
14.8675	14.7847	14.6488	14.9932	14.8504	14.4409	14.7474	14.677	14.9349	13.5933	13.5437	13.0672	13.8204	14.3004	14.0415	13.6897	13.6779	14.204	Homo sapiens	604	>sp|P11216|PYGB_HUMAN Glycogen phosphorylase, brain form OS=Homo sapiens GN=PYGB PE=1 SV=5	PYGB	96695.95	P11216	P11216	24	0
9.34474	9.10141	9.19946	7.79912	9.39487	8.52859	9.32547	8.26236	8.68795	9.94383	9.81051	9.75245	10.5582	9.81741	10.0159	9.74491	9.41081	9.87445	Homo sapiens	605	>sp|P11233|RALA_HUMAN Ras-related protein Ral-A OS=Homo sapiens GN=RALA PE=1 SV=1	RALA	23566.79	P11233	P11233	1	0
14.1374	14.8298	14.2772	14.617	14.8901	14.9548	14.8359	15.0191	15.2127	14.7473	15.1983	15.0785	14.9754	15.2247	15.0135	14.8499	15.3882	15.0999	Homo sapiens	606	>sp|P11234|RALB_HUMAN Ras-related protein Ral-B OS=Homo sapiens GN=RALB PE=1 SV=1	RALB	23408.55	P11234	P11234	4	0
14.3042	14.2644	14.3583	14.606	14.9184	14.7695	15.0245	14.6356	14.8334	15.089	15.4929	15.3247	15.7634	15.6384	15.6585	15.8066	15.9664	15.8951	Homo sapiens	607	>sp|P11279|LAMP1_HUMAN Lysosome-associated membrane glycoprotein 1 OS=Homo sapiens GN=LAMP1 PE=1 SV=3	LAMP1	44882.35	P11279	P11279	5	0
16.029	16.0139	15.8232	16.0243	15.8747	15.5717	15.5445	15.6882	15.8972	14.8449	14.7336	14.8658	14.2694	14.649	14.8243	14.2169	14.2089	13.7713	Homo sapiens	608	>sp|P11310|ACADM_HUMAN Medium-chain specific acyl-CoA dehydrogenase, mitochondrial OS=Homo sapiens GN=ACADM PE=1 SV=1	ACADM	46588.32	P11310	P11310	16	0
13.1192	12.7063	12.2151	13.4498	12.5482	12.2542	12.7395	12.3321	13.0023	12.3207	11.811	8.54505	10.9936	11.3217	12.5397	10.6696	10.557	12.752	Homo sapiens	609	>sp|P11387|TOP1_HUMAN DNA topoisomerase 1 OS=Homo sapiens GN=TOP1 PE=1 SV=2	TOP1	90725.72	P11387	P11387	10	0
14.1145	14.6827	14.9459	14.2249	13.8174	13.9404	13.8172	13.8997	14.181	14.2948	13.9233	12.6296	14.3016	15.3723	13.7768	12.3663	11.4735	14.4595	Homo sapiens	610	>sp|P11388|TOP2A_HUMAN DNA topoisomerase 2-alpha OS=Homo sapiens GN=TOP2A PE=1 SV=3	TOP2A	174385.11	P11388	P11388	15	0
17.5502	17.5581	17.5171	17.6586	17.8415	17.5916	17.6925	17.5972	17.7647	17.17	17.1377	17.0143	17.2755	17.3559	17.4104	17.4552	17.4736	17.5093	Homo sapiens	611	>sp|P11413|G6PD_HUMAN Glucose-6-phosphate 1-dehydrogenase OS=Homo sapiens GN=G6PD PE=1 SV=4	G6PD	59256.75	P11413	P11413	40	0
13.7136	12.8249	12.778	13.1117	13.7323	13.3021	13.3908	13.0797	13.5232	13.6093	13.4109	13.4302	13.8715	13.2374	13.8408	14.2183	14.2777	14.0414	Homo sapiens	612	>sp|P11441|UBL4A_HUMAN Ubiquitin-like protein 4A OS=Homo sapiens GN=UBL4A PE=1 SV=1	UBL4A	17776.5	P11441	P11441	5	0
13.9514	13.6957	13.3231	13.714	13.6919	13.5387	13.4917	13.562	13.7002	13.6549	13.5663	12.8841	13.0701	13.2808	13.4324	12.6965	12.7844	13.2101	Homo sapiens	613	>sp|P11498|PYC_HUMAN Pyruvate carboxylase, mitochondrial OS=Homo sapiens GN=PC PE=1 SV=2	PC	129633.55	P11498	P11498	13	0
17.2213	17.3367	17.2936	17.2393	17.3434	17.3402	17.4362	17.3694	17.345	17.2704	17.3707	17.1113	17.4753	17.5248	17.5304	17.4156	17.5687	17.671	Homo sapiens	614	>sp|P11586|C1TC_HUMAN C-1-tetrahydrofolate synthase, cytoplasmic OS=Homo sapiens GN=MTHFD1 PE=1 SV=3	MTHFD1	101559.22	P11586	P11586	31	0
12.2411	12.1997	11.6656	11.6442	11.4809	11.6035	11.7237	11.6466	10.1423	13.3849	13.2063	13.122	12.5642	12.6703	12.1671	11.583	10.8056	11.8181	Homo sapiens	615	>sp|P11717|MPRI_HUMAN Cation-independent mannose-6-phosphate receptor OS=Homo sapiens GN=IGF2R PE=1 SV=3	IGF2R	274374.82	P11717	P11717	11	0
15.5576	15.5701	15.529	15.5459	15.9016	15.4378	15.4864	15.6275	15.6967	15.5119	15.4956	15.3746	15.339	15.6467	15.5932	15.4383	15.3385	15.4172	Homo sapiens	616	>sp|P11766|ADHX_HUMAN Alcohol dehydrogenase class-3 OS=Homo sapiens GN=ADH5 PE=1 SV=4	ADH5	39724.22	P11766	P11766	12	0
17.0849	17.2586	17.5173	17.5541	17.5938	17.1158	17.2002	17.5175	17.1362	17.1552	17.216	17.2832	17.2762	17.8745	18.67	17.2656	17.3272	16.1042	Homo sapiens	617	>sp|P11908|PRPS2_HUMAN Ribose-phosphate pyrophosphokinase 2 OS=Homo sapiens GN=PRPS2 PE=1 SV=2	PRPS2	34769.12	P11908	P11908	6	0
18.088	18.1864	18.1892	18.0394	17.9932	18.2043	18.0559	18.0796	18.123	18.3737	18.4179	18.5673	18.3912	18.3774	18.2251	18.6035	18.7131	18.646	Homo sapiens	618	>sp|P11940|PABP1_HUMAN Polyadenylate-binding protein 1 OS=Homo sapiens GN=PABPC1 PE=1 SV=2	PABPC1	70670.84	P11940	P11940	43	0
17.983	17.9639	17.9398	17.999	18.1953	18.0526	18.0166	18.1534	18.2324	18.1544	18.0693	18.0716	18.0022	18.3221	18.1899	18.0716	18.2552	18.1759	Homo sapiens	619	>sp|P12004|PCNA_HUMAN Proliferating cell nuclear antigen OS=Homo sapiens GN=PCNA PE=1 SV=1	PCNA	28768.77	P12004	P12004	16	0
14.5058	14.6824	14.7504	14.3723	14.645	14.657	14.415	14.5967	13.9864	14.5179	14.8012	14.8329	14.5172	14.4523	14.5781	14.6817	14.6148	14.3815	Homo sapiens	620	>sp|P12081|SYHC_HUMAN Histidine--tRNA ligase, cytoplasmic OS=Homo sapiens GN=HARS PE=1 SV=2	HARS	57410.5	P12081	P12081	12	0
5.85242	6.90919	7.67224	5.89654	6.88999	7.83871	6.81669	6.42748	8.31358	9.13736	6.7386	7.14291	9.11531	8.84392	8.32259	8.83115	8.43518	10.0853	Homo sapiens	621	>sp|P12109|CO6A1_HUMAN Collagen alpha-1(VI) chain OS=Homo sapiens GN=COL6A1 PE=1 SV=3	COL6A1	108529.39	P12109	P12109	1	0
18.4094	18.6675	18.6208	17.8389	18.0115	17.6488	17.4777	18.0735	17.7216	18.1303	17.928	17.3697	17.4437	18.2033	17.8516	17.1248	17.2814	17.8344	Homo sapiens	622	>sp|P12236|ADT3_HUMAN ADP/ATP translocase 3 OS=Homo sapiens GN=SLC25A6 PE=1 SV=4	SLC25A6	32866.26	P12236	P12236	11	0
16.2016	16.3419	16.6073	16.2263	16.5563	16.7486	16.5635	16.664	16.4828	16.6818	17.0823	17.0863	17.0674	16.7037	16.7913	17.013	17.1814	16.9872	Homo sapiens	623	>sp|P12268|IMDH2_HUMAN Inosine-5'-monophosphate dehydrogenase 2 OS=Homo sapiens GN=IMPDH2 PE=1 SV=2	IMPDH2	55804.98	P12268	P12268	20	0
14.8877	14.8322	15.0341	15.0214	14.7785	15.2429	15.0783	14.8716	15.0051	15.5351	15.8277	15.624	15.4968	15.229	15.5982	15.5645	15.688	15.4485	Homo sapiens	624	>sp|P12270|TPR_HUMAN Nucleoprotein TPR OS=Homo sapiens GN=TPR PE=1 SV=3	TPR	267292.74	P12270	P12270	59	0
12.0998	12.4682	12.2627	12.2403	12.4199	12.8943	12.7496	12.7059	12.5066	13.8506	14.2821	13.959	14.1156	13.7157	14.0012	13.7881	13.6474	13.7395	Homo sapiens	625	>sp|P12277|KCRB_HUMAN Creatine kinase B-type OS=Homo sapiens GN=CKB PE=1 SV=1	CKB	42644.28	P12277	P12277	12	0
14.1014	14.4048	14.1448	13.9778	14.3119	14.1576	14.0209	14.3009	14.3085	14.971	15.526	14.7883	14.724	14.2027	14.6729	14.3333	14.9812	14.9078	Homo sapiens	626	>sp|P12429|ANXA3_HUMAN Annexin A3 OS=Homo sapiens GN=ANXA3 PE=1 SV=3	ANXA3	36375.27	P12429	P12429	9	0
17.0013	17.1022	17.2662	17	17.3016	17.4941	17.4267	17.1793	17.2326	17.7471	18.104	17.7926	18.1023	17.6786	17.8643	17.9009	17.9026	18.0609	Homo sapiens	627	>sp|P12814|ACTN1_HUMAN Alpha-actinin-1 OS=Homo sapiens GN=ACTN1 PE=1 SV=2	ACTN1	103057.55	P12814	P12814	50	0
16.9036	17.0402	16.9659	16.9311	16.8301	16.782	16.5829	16.7044	16.8375	17.2237	17.1468	17.0433	16.7907	16.8815	16.8333	16.7172	16.6153	16.811	Homo sapiens	628	>sp|P12956|XRCC6_HUMAN X-ray repair cross-complementing protein 6 OS=Homo sapiens GN=XRCC6 PE=1 SV=2	XRCC6	69843.06	P12956	P12956	35	0
16.6815	16.6058	16.7267	16.617	16.5613	16.4682	16.4355	16.5999	16.574	16.9192	16.8846	16.5781	16.5884	16.7499	16.5869	16.4778	16.5058	16.8978	Homo sapiens	629	>sp|P13010|XRCC5_HUMAN X-ray repair cross-complementing protein 5 OS=Homo sapiens GN=XRCC5 PE=1 SV=3	XRCC5	82704.54	P13010	P13010	34	0
13.4168	13.5417	13.9754	13.0808	12.8721	13.4136	13.0557	12.9596	12.9354	13.9323	14.1045	13.867	14.4194	14.3359	14.1406	13.9558	14.082	14.4073	Homo sapiens	630	>sp|P13073|COX41_HUMAN Cytochrome c oxidase subunit 4 isoform 1, mitochondrial OS=Homo sapiens GN=COX4I1 PE=1 SV=1	COX4I1	19576.7	P13073	P13073	4	0
14.1175	13.962	14.7118	14.4237	15.6743	15.4936	15.0095	15.5339	15.3597	15.2449	16.4649	15.7752	15.8262	16.4645	16.2242	15.9519	16.8072	16.3803	Homo sapiens	631	>sp|P13473|LAMP2_HUMAN Lysosome-associated membrane glycoprotein 2 OS=Homo sapiens GN=LAMP2 PE=1 SV=2	LAMP2	44960.73	P13473	P13473	1	0.001609788
16.1419	16.1465	15.9606	16.0265	16.1174	15.7734	15.8706	15.9439	16.2123	16.3302	16.0957	15.296	15.4584	16.1596	16.5818	16.0854	16.1317	16.2527	Homo sapiens	632	>sp|P13489|RINI_HUMAN Ribonuclease inhibitor OS=Homo sapiens GN=RNH1 PE=1 SV=2	RNH1	49973.46	P13489	P13489	9	0
14.8057	14.8759	14.9546	14.9185	14.4107	14.8341	14.3951	14.6995	14.5945	9.83791	13.6528	13.0146	13.4448	13.3482	13.9894	13.662	14.4541	12.1959	Homo sapiens	633	>sp|P13611|CSPG2_HUMAN Versican core protein OS=Homo sapiens GN=VCAN PE=1 SV=3	VCAN	372820.05	P13611	P13611	10	0
20.479	20.5905	20.5734	20.4514	20.5792	20.5295	20.4347	20.6434	20.597	20.3381	20.4575	20.6723	20.3237	20.6046	20.27	20.4254	20.5266	20.3957	Homo sapiens	634	>sp|P13639|EF2_HUMAN Elongation factor 2 OS=Homo sapiens GN=EEF2 PE=1 SV=4	EEF2	95338.14	P13639	P13639	69	0
18.001	18.1646	18.2758	18.0362	18.388	18.4995	18.4641	18.4051	18.3893	17.9108	18.1722	18.4003	18.5461	18.2999	18.2711	18.6851	18.858	18.5647	Homo sapiens	637	>sp|P13667|PDIA4_HUMAN Protein disulfide-isomerase A4 OS=Homo sapiens GN=PDIA4 PE=1 SV=2	PDIA4	72932.49	P13667	P13667	48	0
14.02	13.9203	14.0308	14.2442	14.4522	14.1957	14.388	14.1578	14.5275	13.7784	13.4599	13.4602	13.4976	13.8387	13.6475	13.6823	13.6969	13.8692	Homo sapiens	638	>sp|P13674|P4HA1_HUMAN Prolyl 4-hydroxylase subunit alpha-1 OS=Homo sapiens GN=P4HA1 PE=1 SV=2	P4HA1	61049.29	P13674	P13674	21	0
18.5212	18.4985	18.4949	18.4991	18.4708	18.4913	18.2858	18.4961	18.2427	18.7055	18.8904	19.3908	18.7826	18.7342	18.534	18.7215	18.9378	18.4612	Homo sapiens	639	>sp|P13693|TCTP_HUMAN Translationally-controlled tumor protein OS=Homo sapiens GN=TPT1 PE=1 SV=1	TPT1	19595.33	P13693	P13693	15	0
9.4144	10.5843	8.85348	10.4061	10.0474	11.2902	10.8695	11.1801	10.0507	10.7622	11.691	8.68696	12.1586	11.1261	13.2755	11.9797	11.5138	12.6533	Homo sapiens	640	>sp|P13716|HEM2_HUMAN Delta-aminolevulinic acid dehydratase OS=Homo sapiens GN=ALAD PE=1 SV=1	ALAD	36294.87	P13716	P13716	2	0
12.7204	12.5824	12.6329	12.8145	12.9598	13.1701	13.1343	12.9162	12.8034	15.219	15.2262	12.2757	11.0533	10.9762	12.6194	11.1175	11.2537	12.5278	Homo sapiens	641	>sp|P13796|PLSL_HUMAN Plastin-2 OS=Homo sapiens GN=LCP1 PE=1 SV=6	LCP1	70288.39	P13796	P13796	20	0
15.6234	15.6293	15.6745	15.66	15.7682	15.898	16.0137	15.8229	15.6375	16.0587	16.3852	15.8763	15.8134	15.6131	15.8398	15.8239	15.7504	16.0063	Homo sapiens	642	>sp|P13797|PLST_HUMAN Plastin-3 OS=Homo sapiens GN=PLS3 PE=1 SV=4	PLS3	70811.02	P13797	P13797	24	0
11.0055	10.4422	11.3736	11.0956	10.8626	11.1722	11.2058	11.0042	10.8278	12.1749	12.3399	12.6834	12.336	12.4303	12.5206	11.9992	12.1631	11.5177	Homo sapiens	643	>sp|P13798|ACPH_HUMAN Acylamino-acid-releasing enzyme OS=Homo sapiens GN=APEH PE=1 SV=4	APEH	81224.55	P13798	P13798	4	0
14.9002	14.7985	14.4669	14.7035	14.3628	14.4432	14.5143	14.2709	14.549	15.4124	14.9067	15.1255	14.5994	14.4237	14.7211	14.2567	14.3288	14.1172	Homo sapiens	644	>sp|P13804|ETFA_HUMAN Electron transfer flavoprotein subunit alpha, mitochondrial OS=Homo sapiens GN=ETFA PE=1 SV=1	ETFA	35079.57	P13804	P13804	7	0
7.31728	9.35669	8.11886	10.1085	10.1294	10.1054	9.57799	9.98032	12.0498	10.0138	10.1244	10.6994	11.3175	10.4581	10.8185	10.4845	10.1747	9.76856	Homo sapiens	645	>sp|P13861|KAP2_HUMAN cAMP-dependent protein kinase type II-alpha regulatory subunit OS=Homo sapiens GN=PRKAR2A PE=1 SV=2	PRKAR2A	45518.4	P13861	P13861	3	0
18.7982	19.0196	19.2239	18.7385	19.194	19.3639	19.0517	19.3234	19.1438	19.2843	19.5286	19.4275	19.4466	19.1976	19.2983	19.0231	19.2746	19.1516	Homo sapiens	646	>sp|P13929|ENOB_HUMAN Beta-enolase OS=Homo sapiens GN=ENO3 PE=1 SV=5	ENO3	46986.87	P13929	P13929	34	0
14.7868	14.6575	14.6229	14.7677	14.7715	14.5098	14.3644	14.3029	14.6164	14.5347	15.145	15.4703	14.9902	15.5187	15.4733	15.6194	15.5759	14.7484	Homo sapiens	647	>sp|P13984|T2FB_HUMAN General transcription factor IIF subunit 2 OS=Homo sapiens GN=GTF2F2 PE=1 SV=2	GTF2F2	28380.25	P13984	P13984	8	0
15.7442	16.0241	15.9974	15.8591	16.0598	16.3372	15.8714	16.2921	15.9361	15.3565	15.6966	16.0813	16.3708	16.1001	15.8039	16.16	16.3706	16.1422	Homo sapiens	648	>sp|P13995|MTDC_HUMAN Bifunctional methylenetetrahydrofolate dehydrogenase/cyclohydrolase, mitochondrial OS=Homo sapiens GN=MTHFD2 PE=1 SV=2	MTHFD2	37895.07	P13995	P13995	8	0
13.9324	13.8453	14.0873	14.5226	13.7668	14.5713	9.02169	14.5222	14.6951	9.89536	10.9148	15.9132	12.5842	13.0923	9.38838	11.8676	12.6839	10.2175	Homo sapiens	649	>sp|P14136|GFAP_HUMAN Glial fibrillary acidic protein OS=Homo sapiens GN=GFAP PE=1 SV=1	GFAP	49880.2	P14136	P14136	2	0.001318392
14.2047	14.2167	14.7353	15.6179	15.5042	15.5209	15.513	15.191	15.6493	15.6268	16.2217	15.9896	16.1128	16.3307	15.8262	15.5968	16.5118	16.3845	Homo sapiens	650	>sp|P14174|MIF_HUMAN Macrophage migration inhibitory factor OS=Homo sapiens GN=MIF PE=1 SV=4	MIF	12476.29	P14174	P14174	3	0
9.13374	9.32797	7.60637	9.64091	9.12843	7.84807	10.4355	8.56359	8.3686	10.662	8.90755	9.14862	9.97184	9.09418	10.7042	11.5316	9.88519	10.1734	Homo sapiens	651	>sp|P14209|CD99_HUMAN CD99 antigen OS=Homo sapiens GN=CD99 PE=1 SV=1	CD99	18847.87	P14209	P14209	1	0.001609788
16.2899	16.4084	16.4919	16.2354	16.5367	16.6354	16.618	16.4671	16.5292	17.1323	17.3435	17.1372	16.9563	16.7741	16.971	17.1471	17.4807	17.3088	Homo sapiens	652	>sp|P14314|GLU2B_HUMAN Glucosidase 2 subunit beta OS=Homo sapiens GN=PRKCSH PE=1 SV=2	PRKCSH	59425.41	P14314	P14314	11	0
12.0947	13.8014	12.8787	14.7091	14.2381	13.8231	14.5197	13.4908	14.3164	13.1008	12.9718	13.6519	15.3835	15.9322	15.3802	15.0083	14.6517	14.4921	Homo sapiens	653	>sp|P14324|FPPS_HUMAN Farnesyl pyrophosphate synthase OS=Homo sapiens GN=FDPS PE=1 SV=4	FDPS	48275.48	P14324	P14324	6	0
14.0382	13.7633	14.0332	14.0225	14.3288	13.8413	14.4327	14.2555	14.2974	14.8994	15.2675	15.0163	15.1477	14.7898	15.0339	14.975	15.1282	15.0537	Homo sapiens	654	>sp|P14550|AK1A1_HUMAN Alcohol dehydrogenase [NADP(+)] OS=Homo sapiens GN=AKR1A1 PE=1 SV=3	AKR1A1	36573.04	P14550	P14550	14	0
20.9461	20.9858	21.0127	20.9133	21.2309	21.1642	21.2393	21.1982	21.1711	21.0441	21.298	21.0339	21.1172	20.8769	21.119	20.9481	21.1097	21.0442	Homo sapiens	655	>sp|P14618|KPYM_HUMAN Pyruvate kinase PKM OS=Homo sapiens GN=PKM PE=1 SV=4	PKM	57936.88	P14618	P14618	73	0
17.5721	17.6139	17.643	17.5705	17.7686	17.6484	17.6978	17.6807	17.8025	17.5245	17.4662	17.4904	17.5	17.5646	17.521	17.7428	17.8482	17.8118	Homo sapiens	656	>sp|P14625|ENPL_HUMAN Endoplasmin OS=Homo sapiens GN=HSP90B1 PE=1 SV=1	HSP90B1	92468.86	P14625	P14625	65	0
12.0649	11.7354	12.128	12.1272	11.6204	11.2644	11.6915	11.6048	11.6707	12.4885	12.4931	11.9611	12.1842	12.2753	12.3614	12.324	12.377	12.7485	Homo sapiens	657	>sp|P14678|RSMB_HUMAN Small nuclear ribonucleoprotein-associated proteins B and B' OS=Homo sapiens GN=SNRPB PE=1 SV=2;>sp|P63162|RSMN_HUMAN Small nuclear ribonucleoprotein-associated protein N OS=Homo sapiens GN=SNRPN PE=1 SV=1	SNRPB;SNRPN	24610.06;24614.03	P14678;P63162	P14678;P63162	4	0
13.8451	13.7211	13.665	13.6626	13.6405	13.2424	13.6382	13.4892	13.79	14.2079	14.5456	14.3379	14.4255	14.2912	14.4415	14.2823	14.0585	14.1261	Homo sapiens	658	>sp|P14735|IDE_HUMAN Insulin-degrading enzyme OS=Homo sapiens GN=IDE PE=1 SV=4	IDE	117968.49	P14735	P14735	28	0
15.82	16.123	15.9568	15.7378	15.514	15.9009	15.5023	15.5954	15.7643	14.8945	15.263	15.1269	15.1028	14.8808	14.4832	14.5027	14.4904	14.957	Homo sapiens	659	>sp|P14866|HNRPL_HUMAN Heterogeneous nuclear ribonucleoprotein L OS=Homo sapiens GN=HNRNPL PE=1 SV=2	HNRNPL	64132.77	P14866	P14866	11	0
16.4105	16.4841	16.2485	16.4626	16.4404	16.126	16.2687	16.3025	16.3778	16.3392	16.3725	16.1975	16.2738	16.5309	16.3694	16.2443	16.1887	16.4078	Homo sapiens	660	>sp|P14868|SYDC_HUMAN Aspartate--tRNA ligase, cytoplasmic OS=Homo sapiens GN=DARS PE=1 SV=2	DARS	57136.21	P14868	P14868	32	0
19.0549	19.2105	19.0966	19.4325	19.5818	19.2912	20.4582	19.3009	20.044	20.5459	20.8865	20.4177	20.6609	20.3484	20.5981	20.4247	20.7221	20.7785	Homo sapiens	661	>sp|P15121|ALDR_HUMAN Aldose reductase OS=Homo sapiens GN=AKR1B1 PE=1 SV=3	AKR1B1	35853.39	P15121	P15121	21	0
8.58734	8.87928	8.18006	9.1588	7.70834	7.37507	9.75558	8.87359	7.3265	9.57757	10.0259	10.5424	10.4306	8.16862	9.45482	9.7105	10.1951	9.0569	Homo sapiens	662	>sp|P15151|PVR_HUMAN Poliovirus receptor OS=Homo sapiens GN=PVR PE=1 SV=2	PVR	45302.6	P15151	P15151	2	0
16.4447	16.8115	16.9171	16.6255	17.0332	17.1196	16.9438	17.0514	17.0173	16.8824	17.2759	17.2077	17.0769	17.025	17.0272	17.1975	17.4589	17.2235	Homo sapiens	663	>sp|P15170|ERF3A_HUMAN Eukaryotic peptide chain release factor GTP-binding subunit ERF3A OS=Homo sapiens GN=GSPT1 PE=1 SV=1	GSPT1	55755.91	P15170	P15170	24	0
7.13112	8.1497	8.22901	9.88893	9.10647	8.00014	10.3229	8.92266	7.7164	8.01677	6.97578	7.37404	10.0805	8.72639	9.66801	9.36853	7.78187	8.43287	Homo sapiens	664	>sp|P15260|INGR1_HUMAN Interferon gamma receptor 1 OS=Homo sapiens GN=IFNGR1 PE=1 SV=1	IFNGR1	54404.55	P15260	P15260	2	0
17.9639	18.1142	18.2524	18.0055	18.3216	18.4152	18.2117	18.3856	18.2701	18.6627	18.9444	19.0341	18.8627	18.8975	18.9068	18.9265	19.2453	18.8285	Homo sapiens	665	>sp|P15311|EZRI_HUMAN Ezrin OS=Homo sapiens GN=EZR PE=1 SV=4	EZR	69412.8	P15311	P15311	33	0
13.6943	13.5544	13.3564	13.2104	13.4417	13.1145	13.449	13.5615	13.31	13.1375	13.3219	13.1429	13.0522	13.1334	13.4015	13.0883	13.417	13.0308	Homo sapiens	666	>sp|P15374|UCHL3_HUMAN Ubiquitin carboxyl-terminal hydrolase isozyme L3 OS=Homo sapiens GN=UCHL3 PE=1 SV=1	UCHL3	26182.59	P15374	P15374	5	0
11.6824	12.2164	11.6885	12.7235	13.5931	12.3631	13.3025	12.8478	13.2269	11.9975	12.9042	12.603	13.2022	12.6927	12.915	13.6943	14.119	13.7869	Homo sapiens	667	>sp|P15529|MCP_HUMAN Membrane cofactor protein OS=Homo sapiens GN=CD46 PE=1 SV=3	CD46	43747.31	P15529	P15529	2	0
14.775	14.9029	15.0482	14.9388	15.0709	15.288	15.08	14.9711	15.0403	15.7443	16.1611	16.0107	15.994	15.7442	15.8703	15.8518	15.9322	15.8328	Homo sapiens	668	>sp|P15531|NDKA_HUMAN Nucleoside diphosphate kinase A OS=Homo sapiens GN=NME1 PE=1 SV=1	NME1	17148.72	P15531	P15531	7	0
15.6279	15.6747	15.8622	15.6196	16.2286	15.9833	16.3123	16.1036	16.1688	15.4771	15.9614	15.9044	16.5075	16.1784	16.1149	16.6534	16.7751	16.7572	Homo sapiens	669	>sp|P15559|NQO1_HUMAN NAD(P)H dehydrogenase [quinone] 1 OS=Homo sapiens GN=NQO1 PE=1 SV=1	NQO1	30867.64	P15559	P15559	7	0
11.3823	11.1147	11.9871	11.8443	11.4866	12.0156	11.1745	11.9125	10.2652	12.5519	12.8922	12.3555	13.3194	12.9803	13.2409	11.7084	11.8764	12.0678	Homo sapiens	670	>sp|P15586|GNS_HUMAN N-acetylglucosamine-6-sulfatase OS=Homo sapiens GN=GNS PE=1 SV=3	GNS	62082.09	P15586	P15586	8	0
18.4554	18.5118	18.3254	18.5392	18.2765	17.9324	18.0442	18.1054	18.3416	16.9723	16.7167	16.5634	16.7603	17.2511	16.9019	16.785	16.6922	17.1235	Homo sapiens	671	>sp|P15880|RS2_HUMAN 40S ribosomal protein S2 OS=Homo sapiens GN=RPS2 PE=1 SV=2	RPS2	31324.42	P15880	P15880	17	0
11.8883	12.5648	13.2001	13.0158	10.8687	14.6698	11.2289	8.59591	14.0374	8.32261	7.75517	9.78935	6.48792	8.28478	7.97503	7.06783	9.24416	7.45834	Homo sapiens	672	>sp|P15924|DESP_HUMAN Desmoplakin OS=Homo sapiens GN=DSP PE=1 SV=3	DSP	331773.89	P15924	P15924	1	0.001921845
14.4687	14.808	14.7397	14.7639	14.8838	15.1263	14.9987	14.8756	14.8781	14.9448	15.3878	15.6003	15.548	15.6669	15.4895	15.5938	15.9407	15.4512	Homo sapiens	673	>sp|P15927|RFA2_HUMAN Replication protein A 32 kDa subunit OS=Homo sapiens GN=RPA2 PE=1 SV=1	RPA2	29246.85	P15927	P15927	5	0
13.9512	13.6734	13.6083	13.8549	14.4215	14.1237	14.5695	14.2548	14.11	13.7396	13.999	14.0885	14.3133	14.123	14.3119	15.2302	15.0646	14.8344	Homo sapiens	674	>sp|P16070|CD44_HUMAN CD44 antigen OS=Homo sapiens GN=CD44 PE=1 SV=3	CD44	81537.62	P16070	P16070	4	0
17.2935	17.4183	17.2151	17.3141	17.502	17.1174	17.3709	17.3148	17.622	16.8682	17.0091	16.7196	16.8591	16.9123	16.9316	16.8216	16.9662	17.0672	Homo sapiens	675	>sp|P16118|F261_HUMAN 6-phosphofructo-2-kinase/fructose-2,6-bisphosphatase 1 OS=Homo sapiens GN=PFKFB1 PE=1 SV=3	PFKFB1	54681.29	P16118	P16118	1	0.00254696
15.7557	15.5082	15.7055	15.707	16.0589	15.9156	16.0863	15.9821	15.9737	15.9225	15.9366	16.122	16.0021	15.5907	15.6528	15.9135	16.2568	16.0364	Homo sapiens	676	>sp|P16152|CBR1_HUMAN Carbonyl reductase [NADPH] 1 OS=Homo sapiens GN=CBR1 PE=1 SV=3	CBR1	30374.93	P16152	P16152	13	0
8.76692	8.12372	9.03716	6.82905	8.78141	6.98189	9.98206	7.39847	4.38207	10.1328	10.3258	9.72139	10.3193	10.4338	10.0504	8.96131	7.38232	9.00589	Homo sapiens	677	>sp|P16219|ACADS_HUMAN Short-chain specific acyl-CoA dehydrogenase, mitochondrial OS=Homo sapiens GN=ACADS PE=1 SV=1	ACADS	44297.2	P16219	P16219	4	0
10.0684	9.83963	9.88797	10.7969	10.8022	10.5372	10.5284	10.8667	9.62436	11.0164	11.5237	10.5712	11.3415	11.7863	12.4155	10.6423	10.6229	10.4799	Homo sapiens	678	>sp|P16278|BGAL_HUMAN Beta-galactosidase OS=Homo sapiens GN=GLB1 PE=1 SV=2	GLB1	76074.88	P16278	P16278	4	0
13.097	13.7151	12.775	12.6191	12.8889	12.7693	12.7006	13.0612	12.7497	11.9787	11.505	12.3135	11.0945	11.3374	11.8114	11.1799	11.5729	10.2094	Homo sapiens	679	>sp|P16403|H12_HUMAN Histone H1.2 OS=Homo sapiens GN=HIST1H1C PE=1 SV=2	HIST1H1C	21364.75	P16403	P16403	1	0
12.8044	12.4758	12.7502	12.965	13.0301	12.5633	13.2883	12.8183	12.9503	12.5624	12.4249	13.046	13.1219	12.3188	12.3263	13.125	13.7436	13.276	Homo sapiens	680	>sp|P16422|EPCAM_HUMAN Epithelial cell adhesion molecule OS=Homo sapiens GN=EPCAM PE=1 SV=2	EPCAM	34932.28	P16422	P16422	3	0
14.4264	14.1376	14.1624	14.429	14.4397	14.1852	14.1953	14.2012	14.2789	14.0062	13.8097	13.7558	14.1342	14.3755	14.2712	13.8551	13.9569	14.0418	Homo sapiens	681	>sp|P16435|NCPR_HUMAN NADPH--cytochrome P450 reductase OS=Homo sapiens GN=POR PE=1 SV=2	POR	76689.72	P16435	P16435	15	0
8.54599	9.31319	8.81667	9.81325	8.75248	10.5613	8.52514	10.9957	12.1107	9.8695	11.8215	9.73239	9.70808	9.85312	10.5344	10.0003	8.95986	9.83936	Homo sapiens	682	>sp|P16455|MGMT_HUMAN Methylated-DNA--protein-cysteine methyltransferase OS=Homo sapiens GN=MGMT PE=1 SV=1	MGMT	21645.97	P16455	P16455	1	0
16.6937	16.7137	16.769	16.5248	16.4377	16.7355	16.386	16.3928	16.8241	16.9825	16.8753	16.6944	16.5352	16.9989	16.7734	16.5713	16.6247	16.8262	Homo sapiens	683	>sp|P16615|AT2A2_HUMAN Sarcoplasmic/endoplasmic reticulum calcium ATPase 2 OS=Homo sapiens GN=ATP2A2 PE=1 SV=1	ATP2A2	114756.86	P16615	P16615	22	0
15.3971	15.1134	15.3183	15.231	15.5688	15.5374	15.7014	15.6389	15.4781	16.3322	16.5225	16.4106	16.3121	16.0086	16.429	16.8515	16.8457	16.5968	Homo sapiens	684	>sp|P16949|STMN1_HUMAN Stathmin OS=Homo sapiens GN=STMN1 PE=1 SV=3	STMN1	17302.51	P16949	P16949	15	0
13.0705	12.9946	12.3845	13.2719	13.3459	13.0713	13.2144	13.0393	13.381	12.8098	12.499	12.6243	11.4566	10.3976	12.0678	13.9471	13.8104	12.7682	Homo sapiens	685	>sp|P16989|YBOX3_HUMAN Y-box-binding protein 3 OS=Homo sapiens GN=YBX3 PE=1 SV=4	YBX3	40089.95	P16989	P16989	5	0
14.8994	15.1635	14.9142	14.4107	14.2278	14.2829	13.8906	14.3288	13.573	15.3545	16.2973	15.6323	16.6189	16.5534	15.3697	14.4384	14.8357	16.0471	Homo sapiens	686	>sp|P17096|HMGA1_HUMAN High mobility group protein HMG-I/HMG-Y OS=Homo sapiens GN=HMGA1 PE=1 SV=3	HMGA1	11676.02	P17096	P17096	3	0.000674992
14.8195	14.6844	14.814	14.6589	14.912	14.8599	15.0987	15.1361	15.1067	15.3134	15.694	15.5058	15.4925	15.4121	15.4903	15.1643	15.5291	15.3067	Homo sapiens	687	>sp|P17174|AATC_HUMAN Aspartate aminotransferase, cytoplasmic OS=Homo sapiens GN=GOT1 PE=1 SV=3	GOT1	46247.5	P17174	P17174	15	0
12.6538	12.7831	12.7879	13.0013	13.019	12.1921	12.2438	12.8734	13.1547	11.2869	11.2274	11.4414	12.5708	12.8242	12.831	12.5495	12.215	12.0645	Homo sapiens	688	>sp|P17252|KPCA_HUMAN Protein kinase C alpha type OS=Homo sapiens GN=PRKCA PE=1 SV=4	PRKCA	76749.93	P17252	P17252	6	0
13.7922	13.8639	13.394	13.7865	11.1625	12.6588	8.05572	11.8517	8.07931	11.7052	11.3068	8.66453	11.4966	10.8475	10.0702	6.79996	4.94124	9.8139	Homo sapiens	689	>sp|P17480|UBF1_HUMAN Nucleolar transcription factor 1 OS=Homo sapiens GN=UBTF PE=1 SV=1	UBTF	89405.94	P17480	P17480	1	0.003177629
12.2381	12.5542	12.4309	12.8629	13.0859	12.792	12.6215	12.4543	12.7168	12.7086	12.4207	12.424	12.455	13.1668	12.1034	11.8597	11.6952	12.6257	Homo sapiens	690	>sp|P17612|KAPCA_HUMAN cAMP-dependent protein kinase catalytic subunit alpha OS=Homo sapiens GN=PRKACA PE=1 SV=2	PRKACA	40589.66	P17612	P17612	7	0
16.8461	17.0368	16.7632	16.9354	16.7472	16.7066	16.7117	16.7512	16.969	16.4059	16.1597	15.949	16.1565	16.5042	16.2444	15.9928	16.1566	16.4944	Homo sapiens	691	>sp|P17655|CAN2_HUMAN Calpain-2 catalytic subunit OS=Homo sapiens GN=CAPN2 PE=1 SV=6	CAPN2	79995.35	P17655	P17655	16	0
7.65621	5.56994	5.80997	7.61742	8.15165	9.42909	8.48384	7.67533	7.26049	6.45952	7.60956	7.98614	7.99742	7.68484	8.50916	8.17752	8.54017	6.73922	Homo sapiens	692	>sp|P17706|PTN2_HUMAN Tyrosine-protein phosphatase non-receptor type 2 OS=Homo sapiens GN=PTPN2 PE=1 SV=2	PTPN2	48473.27	P17706	P17706	1	0.00254696
16.1856	16.214	15.9811	16.1108	15.7481	15.768	15.574	15.7691	15.9803	15.3528	15.0654	15.0678	14.8195	15.1064	15.2101	14.8158	14.6908	14.6475	Homo sapiens	693	>sp|P17812|PYRG1_HUMAN CTP synthase 1 OS=Homo sapiens GN=CTPS1 PE=1 SV=2	CTPS1	66690.35	P17812	P17812	25	0
16.0699	16.3059	16.1798	15.9564	15.4623	15.7774	15.1838	15.5614	15.6582	15.0763	14.7947	15.0696	14.7001	15.0937	14.5138	14.313	14.1739	14.4923	Homo sapiens	694	>sp|P17844|DDX5_HUMAN Probable ATP-dependent RNA helicase DDX5 OS=Homo sapiens GN=DDX5 PE=1 SV=1	DDX5	69148.08	P17844	P17844	36	0
16.8455	16.8838	16.7135	16.8448	16.9163	16.6104	16.4677	16.6749	16.9202	15.8124	15.5039	15.0212	15.4403	16.1299	16.1382	15.5034	15.4232	15.7472	Homo sapiens	695	>sp|P17858|PFKAL_HUMAN ATP-dependent 6-phosphofructokinase, liver type OS=Homo sapiens GN=PFKL PE=1 SV=6	PFKL	85018.42	P17858	P17858	9	0
17.8921	18.0862	18.3504	18.0129	18.3788	18.6476	18.312	18.5917	18.2381	18.5532	18.8903	18.7324	18.7152	18.6531	18.8963	18.0082	18.0862	17.8243	Homo sapiens	696	>sp|P17931|LEG3_HUMAN Galectin-3 OS=Homo sapiens GN=LGALS3 PE=1 SV=5	LGALS3	26152.33	P17931	P17931	12	0
14.4536	14.7577	14.2357	14.8259	14.5404	14.2778	14.4065	14.5003	14.108	10.5659	10.5646	11.1823	12.8759	12.7157	12.4151	13.053	12.4795	12.5299	Homo sapiens	697	>sp|P17936|IBP3_HUMAN Insulin-like growth factor-binding protein 3 OS=Homo sapiens GN=IGFBP3 PE=1 SV=2	IGFBP3	31674.2	P17936	P17936	4	0
15.2899	15.2325	15.1398	15.4089	15.2155	14.9722	15.0964	14.9449	15.3682	15.1539	14.8851	14.9035	14.8507	15.1266	14.91	14.9254	14.786	15.0503	Homo sapiens	698	>sp|P17980|PRS6A_HUMAN 26S protease regulatory subunit 6A OS=Homo sapiens GN=PSMC3 PE=1 SV=3	PSMC3	49203.53	P17980	P17980	23	0
15.8039	15.9003	15.5653	15.852	15.7593	15.6727	15.816	15.7809	15.8118	15.5997	15.4007	15.5292	15.4782	15.6441	15.5624	15.5241	15.4547	15.4591	Homo sapiens	699	>sp|P17987|TCPA_HUMAN T-complex protein 1 subunit alpha OS=Homo sapiens GN=TCP1 PE=1 SV=1	TCP1	60343.57	P17987	P17987	35	0
13.2033	13.438	13.495	12.9229	12.2244	12.8932	11.9823	12.5249	12.7188	12.8798	12.8824	12.196	12.7011	12.9827	12.8534	12.318	11.7394	12.7022	Homo sapiens	700	>sp|P18031|PTN1_HUMAN Tyrosine-protein phosphatase non-receptor type 1 OS=Homo sapiens GN=PTPN1 PE=1 SV=1	PTPN1	49966.83	P18031	P18031	7	0
11.887	11.9925	11.9962	12.2943	12.0596	11.5771	12.0229	12.0264	12.0515	11.0601	9.90683	11.3836	11.2055	11.585	10.9338	11.6001	11.424	11.0734	Homo sapiens	701	>sp|P18074|ERCC2_HUMAN TFIIH basal transcription factor complex helicase XPD subunit OS=Homo sapiens GN=ERCC2 PE=1 SV=1	ERCC2	86909.19	P18074	P18074	7	0
18.6343	18.7695	18.6358	18.6811	18.7333	18.474	18.4631	18.6349	18.7187	17.4245	17.3935	16.9697	17.3686	17.8672	17.5001	17.2635	17.3916	17.8846	Homo sapiens	702	>sp|P18077|RL35A_HUMAN 60S ribosomal protein L35a OS=Homo sapiens GN=RPL35A PE=1 SV=2	RPL35A	12537.67	P18077	P18077	11	0
15.5191	15.6065	14.9741	15.4969	15.1967	15.0338	14.833	14.9691	15.2592	14.9214	14.6268	14.8542	14.3649	14.5736	14.4938	14.729	14.7777	14.6487	Homo sapiens	703	>sp|P18085|ARF4_HUMAN ADP-ribosylation factor 4 OS=Homo sapiens GN=ARF4 PE=1 SV=3	ARF4	20510.77	P18085	P18085	7	0
17.7259	17.7989	17.6882	17.8659	17.6338	17.3359	17.5419	17.5572	17.7349	16.2328	15.782	16.0099	15.9432	16.3038	15.9488	15.951	15.8045	16.0499	Homo sapiens	704	>sp|P18124|RL7_HUMAN 60S ribosomal protein L7 OS=Homo sapiens GN=RPL7 PE=1 SV=1	RPL7	29225.77	P18124	P18124	20	0
17.1876	17.3811	17.4387	17.1973	17.5482	17.6363	17.6239	17.5893	17.5551	17.7495	18.1318	17.9726	18.1107	17.872	17.8957	17.9136	18.1472	18.0942	Homo sapiens	705	>sp|P18206|VINC_HUMAN Vinculin OS=Homo sapiens GN=VCL PE=1 SV=4	VCL	123799.3	P18206	P18206	59	0
13.5595	13.5829	13.8953	13.4264	12.0756	13.5816	10.3104	12.3332	11.7841	10.1269	9.4697	9.07819	11.3926	11.667	12.2243	9.93181	10.5491	10.266	Homo sapiens	706	>sp|P18583|SON_HUMAN Protein SON OS=Homo sapiens GN=SON PE=1 SV=4	SON	263829.97	P18583	P18583	7	0
7.69693	5.88518	8.02333	7.64477	9.55335	6.99414	7.71029	5.9926	8.26128	5.66288	7.61897	8.28631	9.68128	8.92759	8.06566	7.06893	8.29029	7.27301	Homo sapiens	707	>sp|P18615|NELFE_HUMAN Negative elongation factor E OS=Homo sapiens GN=NELFE PE=1 SV=3	NELFE	43239.8	P18615	P18615	1	0
16.1555	16.2604	15.9636	16.2284	16.409	15.2895	16.9074	16.0705	16.7183	16.1256	16.6359	15.7397	16.2752	16.051	16.2603	15.6434	15.8532	16.2921	Homo sapiens	708	>sp|P18669|PGAM1_HUMAN Phosphoglycerate mutase 1 OS=Homo sapiens GN=PGAM1 PE=1 SV=2	PGAM1	28803.93	P18669	P18669	18	0
8.30783	7.57538	6.40357	6.80829	8.22964	8.55558	9.38034	7.4307	9.97816	8.45705	8.37653	5.69103	6.91313	8.95527	7.57492	7.38396	8.53869	8.80484	Homo sapiens	709	>sp|P18827|SDC1_HUMAN Syndecan-1 OS=Homo sapiens GN=SDC1 PE=1 SV=3	SDC1	32461.62	P18827	P18827	1	0.000342818
11.9687	11.5047	11.5227	11.4836	11.5513	11.0053	10.8729	10.1175	11.4545	11.4896	10.572	11.1781	11.3844	12.2033	11.2702	11.9226	11.4757	12.0755	Homo sapiens	710	>sp|P18858|DNLI1_HUMAN DNA ligase 1 OS=Homo sapiens GN=LIG1 PE=1 SV=1	LIG1	101736.1	P18858	P18858	5	0
15.6316	15.7848	15.6926	15.8305	16.3904	15.8275	16.5453	16.3161	16.1222	15.3197	16.21	15.1737	16.3427	15.8989	16.6153	16.365	16.4621	16.5102	Homo sapiens	711	>sp|P19022|CADH2_HUMAN Cadherin-2 OS=Homo sapiens GN=CDH2 PE=1 SV=4	CDH2	99809.33	P19022	P19022	7	0
19.2603	19.4306	19.3244	19.2273	19.2776	19.4239	19.0969	19.3103	19.5123	19.4207	19.5212	19.6055	19.0209	19.1022	19.0579	19.4266	19.6979	19.4313	Homo sapiens	712	>sp|P19338|NUCL_HUMAN Nucleolin OS=Homo sapiens GN=NCL PE=1 SV=3	NCL	76614.4	P19338	P19338	53	0
13.2301	12.4442	12.3068	13.0375	12.776	12.2551	10.9188	12.5782	12.3779	11.2027	10.7091	11.455	12.3406	12.128	12.2245	11.8408	11.0496	10.9559	Homo sapiens	713	>sp|P19387|RPB3_HUMAN DNA-directed RNA polymerase II subunit RPB3 OS=Homo sapiens GN=POLR2C PE=1 SV=2	POLR2C	31441.2	P19387	P19387	4	0
13.9301	13.9194	14.2113	13.8708	13.9614	14.0684	13.6855	13.9673	13.9473	13.5118	13.9386	13.9157	14.1	13.9997	13.9508	13.7809	14.3054	13.9516	Homo sapiens	714	>sp|P19388|RPAB1_HUMAN DNA-directed RNA polymerases I, II, and III subunit RPABC1 OS=Homo sapiens GN=POLR2E PE=1 SV=4	POLR2E	24551.21	P19388	P19388	5	0
7.97761	8.31649	6.61789	10.1358	9.20032	7.35726	7.40847	7.91706	9.08971	13.6903	13.1443	11.3367	8.94094	10.4162	10.9025	10.1526	11.249	11.5575	Homo sapiens	715	>sp|P19404|NDUV2_HUMAN NADH dehydrogenase [ubiquinone] flavoprotein 2, mitochondrial OS=Homo sapiens GN=NDUFV2 PE=1 SV=2	NDUFV2	27391.55	P19404	P19404	2	0
13.3301	13.7651	13.2677	13.4736	13.9368	13.491	13.7485	13.6632	14.0026	12.4666	12.8557	13.0504	12.6055	13.072	12.3789	12.8145	12.7122	12.834	Homo sapiens	716	>sp|P19623|SPEE_HUMAN Spermidine synthase OS=Homo sapiens GN=SRM PE=1 SV=1	SRM	33824.68	P19623	P19623	4	0
10.8226	10.1517	10.6218	11.8575	9.7675	9.08374	8.57253	10.6004	8.309	9.81226	9.87866	11.1065	10.6323	10.4464	10.4178	10.4872	9.36112	8.78467	Homo sapiens	717	>sp|P19784|CSK22_HUMAN Casein kinase II subunit alpha' OS=Homo sapiens GN=CSNK2A2 PE=1 SV=1	CSNK2A2	41213.23	P19784	P19784	4	0
6.95193	8.297	8.76117	8.29962	7.46691	7.88314	7.31973	7.47754	6.40419	8.17097	6.07567	8.34207	7.70815	7.49382	5.35339	8.49171	7.79391	6.98411	Homo sapiens	718	>sp|P19878|NCF2_HUMAN Neutrophil cytosol factor 2 OS=Homo sapiens GN=NCF2 PE=1 SV=2	NCF2	59761.53	P19878	P19878	1	0.000342818
15.3198	15.3319	15.2237	15.2156	15.3875	15.1038	15.2014	15.3611	15.4065	15.4222	15.3097	15.3372	15.3454	15.584	15.2979	15.1728	15.1683	15.3662	Homo sapiens	719	>sp|P20020|AT2B1_HUMAN Plasma membrane calcium-transporting ATPase 1 OS=Homo sapiens GN=ATP2B1 PE=1 SV=3	ATP2B1	138755.24	P20020	P20020	24	0
15.6453	15.5821	15.6001	15.7036	15.6363	15.754	15.5725	15.611	15.6064	15.4177	15.2565	16.0315	15.836	15.6112	15.6116	15.6716	15.451	14.9789	Homo sapiens	720	>sp|P20042|IF2B_HUMAN Eukaryotic translation initiation factor 2 subunit 2 OS=Homo sapiens GN=EIF2S2 PE=1 SV=2	EIF2S2	38388.4	P20042	P20042	16	0
16.2676	16.6139	16.741	16.4502	16.9508	16.9047	16.5748	16.8618	16.6603	17.0929	17.4856	17.2717	17.2575	17.2738	17.3348	17.4431	17.6895	17.5147	Homo sapiens	721	>sp|P20073|ANXA7_HUMAN Annexin A7 OS=Homo sapiens GN=ANXA7 PE=1 SV=3	ANXA7	52739.24	P20073	P20073	15	0
15.9715	15.7599	15.7917	16.0984	16.6168	16.4828	16.513	16.4632	16.3093	14.7978	15.0906	16.1417	16.0035	16.0581	16.0828	17.5021	17.6138	16.3084	Homo sapiens	722	>sp|P20290|BTF3_HUMAN Transcription factor BTF3 OS=Homo sapiens GN=BTF3 PE=1 SV=1	BTF3	22167.96	P20290	P20290	10	0
11.3627	11.5215	11.567	12.2741	12.5158	12.2064	12.5864	12.4129	12.5101	12.7406	13.1624	12.5038	13.4234	12.5849	13.2689	13.2133	13.2701	13.4247	Homo sapiens	723	>sp|P20338|RAB4A_HUMAN Ras-related protein Rab-4A OS=Homo sapiens GN=RAB4A PE=1 SV=3	RAB4A	24389.64	P20338	P20338	5	0
13.8264	12.9327	13.2563	13.9452	13.9773	13.7174	14.5467	13.9636	12.6474	14.6847	14.4857	14.4801	14.98	14.1847	14.576	14.7063	14.709	14.8191	Homo sapiens	724	>sp|P20339|RAB5A_HUMAN Ras-related protein Rab-5A OS=Homo sapiens GN=RAB5A PE=1 SV=2	RAB5A	23658.68	P20339	P20339	5	0
13.9623	13.9349	14.4275	14.2356	14.478	14.7674	14.4236	14.4383	14.45	14.7614	15.1295	14.9357	15.1738	14.9751	15.0799	15.0802	15.3427	15.2158	Homo sapiens	725	>sp|P20340|RAB6A_HUMAN Ras-related protein Rab-6A OS=Homo sapiens GN=RAB6A PE=1 SV=3	RAB6A	23592.78	P20340	P20340	9	0
15.54	15.6484	15.8975	15.6098	15.9845	16.3188	16.1758	15.8665	16.1066	15.7456	16.0523	15.8301	16.0788	15.3514	15.9474	16.1743	16.1802	16.0138	Homo sapiens	726	>sp|P20618|PSB1_HUMAN Proteasome subunit beta type-1 OS=Homo sapiens GN=PSMB1 PE=1 SV=2	PSMB1	26489.36	P20618	P20618	9	0
16.6578	16.598	15.473	17.2712	17.6435	17.2016	16.9987	16.6687	17.517	16.7962	17.7064	17.6062	16.952	17.9198	17.3238	17.1788	17.177	16.9352	Homo sapiens	727	>sp|P20645|MPRD_HUMAN Cation-dependent mannose-6-phosphate receptor OS=Homo sapiens GN=M6PR PE=1 SV=1	M6PR	30993.27	P20645	P20645	3	0
13.9829	14.659	14.5806	14.0061	13.2539	14.2607	13.3804	13.5815	12.2532	17.2887	17.5344	17.0111	17.252	16.9855	17.1431	16.6529	16.3937	16.8994	Homo sapiens	728	>sp|P20700|LMNB1_HUMAN Lamin-B1 OS=Homo sapiens GN=LMNB1 PE=1 SV=2	LMNB1	66408.34	P20700	P20700	21	0
13.9048	13.1299	13.1045	13.997	14.1658	13.7788	14.4585	13.854	14.1937	12.6846	12.4845	14.037	13.8417	13.3742	13.8613	15.5143	15.5946	13.8486	Homo sapiens	729	>sp|P20810|ICAL_HUMAN Calpastatin OS=Homo sapiens GN=CAST PE=1 SV=4	CAST	76572.83	P20810	P20810	29	0
15.8391	15.9011	15.8215	14.1202	13.0648	13.821	13.146	13.7398	13.1947	15.58	15.5083	15.9776	13.8728	14.4322	13.6984	15.1049	15.0178	15.082	Homo sapiens	730	>sp|P20815|CP3A5_HUMAN Cytochrome P450 3A5 OS=Homo sapiens GN=CYP3A5 PE=1 SV=1	CYP3A5	57108.61	P20815	P20815	13	0
12.5571	12.4822	13.1204	13.4353	13.7109	13.3967	13.9674	13.3005	13.1953	11.9285	12.1238	12.2805	13.3541	12.0517	12.3118	13.3248	12.6894	13.1438	Homo sapiens	731	>sp|P20839|IMDH1_HUMAN Inosine-5'-monophosphate dehydrogenase 1 OS=Homo sapiens GN=IMPDH1 PE=1 SV=2	IMPDH1	55405.79	P20839	P20839	3	0
11.9455	11.7748	11.9231	11.8856	11.7008	11.8053	11.7964	11.7922	11.9282	11.885	11.5354	11.1946	11.4563	11.7798	11.7736	11.0692	11.24	11.5147	Homo sapiens	732	>sp|P20936|RASA1_HUMAN Ras GTPase-activating protein 1 OS=Homo sapiens GN=RASA1 PE=1 SV=1	RASA1	116403.24	P20936	P20936	14	0
14.514	13.5853	14.0982	14.6209	14.622	14.3214	14.1046	14.4919	13.8448	12.7499	12.7154	13.0618	13.355	13.6157	13.5898	14.4893	14.3659	13.9939	Homo sapiens	733	>sp|P20962|PTMS_HUMAN Parathymosin OS=Homo sapiens GN=PTMS PE=1 SV=2	PTMS	11529.9	P20962	P20962	3	0
9.24866	9.28892	8.85913	9.36885	8.696	8.68366	9.98802	8.25673	9.22274	8.75191	9.11863	12.8972	9.8428	9.42649	7.67261	10.1971	8.68168	7.43947	Homo sapiens	734	>sp|P21127|CD11B_HUMAN Cyclin-dependent kinase 11B OS=Homo sapiens GN=CDK11B PE=1 SV=3;>sp|Q9UQ88|CD11A_HUMAN Cyclin-dependent kinase 11A OS=Homo sapiens GN=CDK11A PE=1 SV=4	CDK11B;CDK11A	92707.01;91361.58	P21127;Q9UQ88	P21127;Q9UQ88	4	0
15.5656	15.6911	15.8374	15.515	15.6054	15.9191	15.5305	15.8133	15.781	16.2345	16.3722	16.381	16.5223	16.4208	16.2948	15.9901	16.1827	16.1855	Homo sapiens	735	>sp|P21281|VATB2_HUMAN V-type proton ATPase subunit B, brain isoform OS=Homo sapiens GN=ATP6V1B2 PE=1 SV=3	ATP6V1B2	56500.73	P21281	P21281	13	0
13.8709	14.1526	14.03	13.9969	14.0452	13.4654	13.7166	13.8766	13.8586	12.7768	12.7424	13.1188	13.147	13.5874	13.0522	12.827	13.2341	12.9864	Homo sapiens	736	>sp|P21283|VATC1_HUMAN V-type proton ATPase subunit C 1 OS=Homo sapiens GN=ATP6V1C1 PE=1 SV=4	ATP6V1C1	43941.61	P21283	P21283	9	0
14.1322	12.5604	12.2977	13.7618	11.9733	15.0055	12.6173	11.7719	13.3171	11.4705	10.7689	10.9605	13.4518	10.5463	13.2662	14.2129	12.6613	12.3291	Homo sapiens	737	>sp|P21291|CSRP1_HUMAN Cysteine and glycine-rich protein 1 OS=Homo sapiens GN=CSRP1 PE=1 SV=3	CSRP1	20567.39	P21291	P21291	6	0
17.0869	17.3103	17.3624	16.8722	16.8785	17.1562	16.8197	17.1386	16.6842	18.0466	18.413	18.3201	18.2751	18.156	17.9979	17.4412	17.6049	17.6504	Homo sapiens	738	>sp|P21333|FLNA_HUMAN Filamin-A OS=Homo sapiens GN=FLNA PE=1 SV=4	FLNA	280739	P21333	P21333	83	0
10.5944	11.1423	10.6317	10.4478	11.4177	10.5018	10.3083	9.97125	10.8862	9.81959	7.78403	8.8194	9.2058	9.59747	7.38602	8.89362	8.21659	10.5531	Homo sapiens	739	>sp|P21359|NF1_HUMAN Neurofibromin OS=Homo sapiens GN=NF1 PE=1 SV=2	NF1	319372.29	P21359	P21359	9	0
12.8922	13.166	13.1124	13.4125	13.5293	12.9122	12.6787	13.425	13.4205	12.319	12.0325	11.6346	12.8295	13.0481	12.7479	12.5365	12.495	13.2478	Homo sapiens	740	>sp|P21399|ACOC_HUMAN Cytoplasmic aconitate hydratase OS=Homo sapiens GN=ACO1 PE=1 SV=3	ACO1	98398.87	P21399	P21399	8	0
4.95925	7.2758	10.1014	5.92476	7.72794	7.04835	8.60352	7.51589	7.87607	10.0516	9.11455	7.17878	7.7335	7.25181	6.99563	8.15485	8.10338	11.0304	Homo sapiens	741	>sp|P21796|VDAC1_HUMAN Voltage-dependent anion-selective channel protein 1 OS=Homo sapiens GN=VDAC1 PE=1 SV=2	VDAC1	30772.59	P21796	P21796	2	0
13.6316	13.7198	13.5604	13.6319	13.6091	13.3786	13.791	13.2544	13.5146	14.26	14.1397	14.2153	13.7887	14.0327	13.4182	13.654	14.0054	14.3067	Homo sapiens	742	>sp|P21912|SDHB_HUMAN Succinate dehydrogenase [ubiquinone] iron-sulfur subunit, mitochondrial OS=Homo sapiens GN=SDHB PE=1 SV=3	SDHB	31629.7	P21912	P21912	5	0
14.1096	14.8007	14.3671	15.1166	15.0913	15.0543	15.4673	15.1996	14.1153	15.1806	15.6868	15.3487	15.6193	15.5475	15.383	15.8313	16.0039	16.2029	Homo sapiens	743	>sp|P21926|CD9_HUMAN CD9 antigen OS=Homo sapiens GN=CD9 PE=1 SV=4	CD9	25416.05	P21926	P21926	3	0
12.0164	11.4067	8.98257	11.1342	11.3903	10.8405	11.4248	11.0991	11.6931	11.7152	11.0846	11.4915	11.3718	11.0031	11.2269	10.4298	11.7416	10.9547	Homo sapiens	744	>sp|P21964|COMT_HUMAN Catechol O-methyltransferase OS=Homo sapiens GN=COMT PE=1 SV=2	COMT	30037.05	P21964	P21964	1	0.00254696
17.4469	17.5714	17.4755	17.3821	17.5258	17.7244	17.6846	17.5728	17.5143	18.0339	18.3247	18.313	18.1818	18.0414	18.075	17.9031	17.893	17.801	Homo sapiens	745	>sp|P21980|TGM2_HUMAN Protein-glutamine gamma-glutamyltransferase 2 OS=Homo sapiens GN=TGM2 PE=1 SV=2	TGM2	77328.82	P21980	P21980	29	0
11.3498	11.9687	11.6418	11.8217	12.256	12.4272	12.5164	11.982	12.1772	13.0686	13.1597	13.4011	13.6336	13.4684	13.276	13.3173	13.1849	13.2392	Homo sapiens	746	>sp|P22059|OSBP1_HUMAN Oxysterol-binding protein 1 OS=Homo sapiens GN=OSBP PE=1 SV=1	OSBP	89420.56	P22059	P22059	9	0
14.9219	15.1591	14.9505	15.0965	15.2938	15.4643	15.0568	15.2078	14.8682	15.7462	15.9262	15.861	15.7156	15.5465	15.8123	15.7698	15.8976	15.6276	Homo sapiens	747	>sp|P22061|PIMT_HUMAN Protein-L-isoaspartate(D-aspartate) O-methyltransferase OS=Homo sapiens GN=PCMT1 PE=1 SV=4	PCMT1	24636.37	P22061	P22061	10	0
13.9981	14.5397	13.9612	13.9209	13.697	13.3765	13.343	13.5686	13.3213	12.4582	12.2858	11.6602	12.6566	13.0164	12.2973	10.0014	9.97865	11.241	Homo sapiens	748	>sp|P22087|FBRL_HUMAN rRNA 2'-O-methyltransferase fibrillarin OS=Homo sapiens GN=FBL PE=1 SV=2	FBL	33784.22	P22087	P22087	9	0
16.4615	16.5141	16.4672	16.461	16.4789	16.2789	16.4258	16.3306	16.5445	16.158	16.1474	16.1717	15.8929	16.2027	16.0913	15.9958	16.0151	15.9429	Homo sapiens	749	>sp|P22102|PUR2_HUMAN Trifunctional purine biosynthetic protein adenosine-3 OS=Homo sapiens GN=GART PE=1 SV=1	GART	107767.19	P22102	P22102	34	0
15.6386	15.8205	15.6232	15.5674	16.0938	16.0886	15.9776	16.0524	15.7293	15.8234	15.6974	15.9596	15.9707	16.0624	15.9806	16.1441	16.371	16.0943	Homo sapiens	750	>sp|P22234|PUR6_HUMAN Multifunctional protein ADE2 OS=Homo sapiens GN=PAICS PE=1 SV=3	PAICS	47079.22	P22234	P22234	11	0
12.8333	12.859	12.9544	12.8589	13.3236	13.2445	13.3627	13.1988	12.7956	13.6593	13.8528	13.4214	13.5136	12.9375	13.3722	13.4194	13.1168	13.4562	Homo sapiens	751	>sp|P22307|NLTP_HUMAN Non-specific lipid-transfer protein OS=Homo sapiens GN=SCP2 PE=1 SV=2	SCP2	58993.61	P22307	P22307	8	0
17.2766	17.3206	17.6089	17.2051	17.5258	17.7269	17.4111	17.5801	17.6593	17.5648	17.8368	17.7575	17.6524	17.5367	17.6029	17.7244	17.8487	17.7214	Homo sapiens	752	>sp|P22314|UBA1_HUMAN Ubiquitin-like modifier-activating enzyme 1 OS=Homo sapiens GN=UBA1 PE=1 SV=3	UBA1	117849	P22314	P22314	24	0
17.24	17.3121	17.3872	17.1759	17.5697	17.7256	17.3455	17.5634	17.3431	18.2465	18.5316	18.3616	18.3233	18.08	18.0426	18.2096	18.4121	18.4974	Homo sapiens	753	>sp|P22392|NDKB_HUMAN Nucleoside diphosphate kinase B OS=Homo sapiens GN=NME2 PE=1 SV=1	NME2	17298.03	P22392	P22392	23	0
8.2589	8.06024	7.62029	7.93989	8.28505	8.35017	9.13132	7.17993	4.39642	8.60898	8.44134	7.1604	8.09762	7.80828	8.31043	7.6647	6.81694	8.2481	Homo sapiens	754	>sp|P22570|ADRO_HUMAN NADPH:adrenodoxin oxidoreductase, mitochondrial OS=Homo sapiens GN=FDXR PE=1 SV=3	FDXR	53836.79	P22570	P22570	8	0.000342818
17.7117	18.492	18.6431	17.6671	17.4266	18.2553	17.2986	17.6877	17.8798	17.7029	17.9508	17.7576	17.5608	17.4217	16.9543	17.5303	17.5956	18.1693	Homo sapiens	755	>sp|P22626|ROA2_HUMAN Heterogeneous nuclear ribonucleoproteins A2/B1 OS=Homo sapiens GN=HNRNPA2B1 PE=1 SV=2	HNRNPA2B1	37429.69	P22626	P22626	32	0
8.32666	6.73129	7.54263	7.49328	6.04999	8.89286	8.69095	7.30444	9.14663	9.59315	7.63449	7.10783	7.66055	8.24405	9.02659	8.69699	7.37582	8.4681	Homo sapiens	756	>sp|P22694|KAPCB_HUMAN cAMP-dependent protein kinase catalytic subunit beta OS=Homo sapiens GN=PRKACB PE=1 SV=2	PRKACB	40622.69	P22694	P22694	2	0
13.039	13.3165	13.258	12.8993	11.9457	12.9464	10.8281	12.4515	12.6201	11.7539	11.1719	8.99566	11.6736	13.4023	15.2619	10.664	10.2505	10.2006	Homo sapiens	757	>sp|P22695|QCR2_HUMAN Cytochrome b-c1 complex subunit 2, mitochondrial OS=Homo sapiens GN=UQCRC2 PE=1 SV=3	UQCRC2	48443	P22695	P22695	2	0
14.5511	14.5459	14.5837	14.8075	14.5861	14.6691	14.8137	14.6819	14.8642	15.3552	15.3996	15.285	15.1869	15.4065	15.3468	15.5936	15.9171	15.7976	Homo sapiens	758	>sp|P23193|TCEA1_HUMAN Transcription elongation factor A protein 1 OS=Homo sapiens GN=TCEA1 PE=1 SV=2	TCEA1	33969.63	P23193	P23193	10	0
16.1044	16.6026	16.1549	16.0662	15.6758	15.7364	15.2718	15.9675	15.2894	15.4976	15.6456	16.1755	15.5484	15.6506	15.4389	15.6152	15.7112	15.22	Homo sapiens	759	>sp|P23246|SFPQ_HUMAN Splicing factor, proline- and glutamine-rich OS=Homo sapiens GN=SFPQ PE=1 SV=2	SFPQ	76149.34	P23246	P23246	34	0
9.36087	9.21293	8.7771	9.87432	8.86799	6.42603	8.93426	7.89158	9.54291	8.95431	8.72295	6.68141	9.27479	9.79672	9.74646	9.09861	8.03849	10.5151	Homo sapiens	760	>sp|P23258|TBG1_HUMAN Tubulin gamma-1 chain OS=Homo sapiens GN=TUBG1 PE=1 SV=2;>sp|Q9NRH3|TBG2_HUMAN Tubulin gamma-2 chain OS=Homo sapiens GN=TUBG2 PE=2 SV=1	TUBG1;TUBG2	51169.92;51091.76	P23258;Q9NRH3	P23258;Q9NRH3	5	0
18.1331	18.2159	18.2449	18.1961	18.2782	18.4091	18.4182	18.2982	18.3047	18.4414	18.7348	18.5439	18.5087	18.2101	18.2621	18.4786	18.5666	18.6642	Homo sapiens	761	>sp|P23284|PPIB_HUMAN Peptidyl-prolyl cis-trans isomerase B OS=Homo sapiens GN=PPIB PE=1 SV=2	PPIB	23742.53	P23284	P23284	16	0
13.6301	13.9505	13.0373	12.9059	12.9014	13.1119	13.201	14.1187	12.9597	13.1648	11.6283	12.1787	10.9552	10.2911	13.0948	13.2613	9.69322	9.22351	Homo sapiens	762	>sp|P23297|S10A1_HUMAN Protein S100-A1 OS=Homo sapiens GN=S100A1 PE=1 SV=2	S100A1	10545.81	P23297	P23297	3	0
16.9661	17.0756	17.3101	16.8151	17.0248	17.2292	16.9455	17.1522	17.011	16.8184	17.1999	17.5027	17.5061	17.3543	17.1979	17.4827	17.7189	17.3396	Homo sapiens	763	>sp|P23368|MAOM_HUMAN NAD-dependent malic enzyme, mitochondrial OS=Homo sapiens GN=ME2 PE=1 SV=1	ME2	65443.59	P23368	P23368	24	0
7.81365	6.63396	8.75169	9.1415	7.52466	9.69987	7.8948	7.74104	9.47792	8.72714	6.91145	9.71158	7.57858	9.76014	8.74089	7.73583	7.37716	5.59268	Homo sapiens	764	>sp|P23378|GCSP_HUMAN Glycine dehydrogenase (decarboxylating), mitochondrial OS=Homo sapiens GN=GLDC PE=1 SV=2	GLDC	112729.77	P23378	P23378	1	0.001002674
17.2407	17.3157	17.6826	17.2524	17.825	17.7847	17.4083	17.8409	17.3097	17.1149	17.5817	18.0302	17.7316	17.6922	17.5778	17.6226	18.0012	17.2641	Homo sapiens	765	>sp|P23381|SYWC_HUMAN Tryptophan--tRNA ligase, cytoplasmic OS=Homo sapiens GN=WARS PE=1 SV=2	WARS	53165.41	P23381	P23381	12	0
17.8881	17.9779	17.7466	18.0133	17.7599	17.6344	17.7187	17.7239	18.0079	17.1025	16.9284	16.9841	16.7953	17.2043	16.8826	16.8307	16.8403	16.984	Homo sapiens	766	>sp|P23396|RS3_HUMAN 40S ribosomal protein S3 OS=Homo sapiens GN=RPS3 PE=1 SV=2	RPS3	26688.31	P23396	P23396	22	0
7.57287	6.2535	6.92613	9.4608	7.89452	7.44944	9.67037	8.68799	8.12556	7.41601	7.24453	6.61711	8.44508	6.89614	8.72397	7.77933	7.93252	7.06086	Homo sapiens	767	>sp|P23511|NFYA_HUMAN Nuclear transcription factor Y subunit alpha OS=Homo sapiens GN=NFYA PE=1 SV=2	NFYA	36876.67	P23511	P23511	1	0.001318392
16.4512	16.5492	16.566	16.4365	16.6877	16.7138	16.7189	16.6536	16.7178	16.8313	17.0541	16.9849	16.8358	16.8091	16.84	16.8452	16.9701	16.8479	Homo sapiens	768	>sp|P23526|SAHH_HUMAN Adenosylhomocysteinase OS=Homo sapiens GN=AHCY PE=1 SV=4	AHCY	47716.07	P23526	P23526	22	0
19.0132	19.0287	18.6769	18.9723	19.0385	18.8807	18.9362	19.0883	19.1691	19.9406	19.9519	20.0278	19.8411	19.8608	19.6558	19.6283	19.7825	19.8189	Homo sapiens	769	>sp|P23528|COF1_HUMAN Cofilin-1 OS=Homo sapiens GN=CFL1 PE=1 SV=3	CFL1	18502.49	P23528	P23528	28	0
15.3108	15.3536	15.2759	15.2047	15.6741	15.5467	15.6829	15.5019	15.5886	14.6507	14.9059	15.0021	15.408	15.1801	15.7163	15.9801	16.2584	15.4732	Homo sapiens	770	>sp|P23588|IF4B_HUMAN Eukaryotic translation initiation factor 4B OS=Homo sapiens GN=EIF4B PE=1 SV=2	EIF4B	69151.21	P23588	P23588	21	0
13.3519	13.2234	13.0163	13.3599	13.1809	12.7729	12.8616	12.9881	12.764	11.4954	11.105	12.4273	12.0058	12.5096	12.2399	10.4706	11.3623	9.80723	Homo sapiens	771	>sp|P23743|DGKA_HUMAN Diacylglycerol kinase alpha OS=Homo sapiens GN=DGKA PE=1 SV=3	DGKA	82630.21	P23743	P23743	4	0
11.9368	11.8907	12.0961	11.6071	11.5785	11.9024	11.8695	11.1957	10.9416	12.4211	12.3727	12.8001	11.8759	11.6522	11.8692	11.5091	12.0072	11.2497	Homo sapiens	772	>sp|P23786|CPT2_HUMAN Carnitine O-palmitoyltransferase 2, mitochondrial OS=Homo sapiens GN=CPT2 PE=1 SV=2	CPT2	73777.02	P23786	P23786	7	0
11.8686	11.335	11.9298	12.0247	11.8489	12.4074	12.1299	11.8031	11.8417	11.9456	11.5752	11.4104	12.102	12.4343	12.1407	11.5197	11.2638	11.8692	Homo sapiens	773	>sp|P23919|KTHY_HUMAN Thymidylate kinase OS=Homo sapiens GN=DTYMK PE=1 SV=4	DTYMK	23819.33	P23919	P23919	3	0
15.1439	15.2508	15.2955	14.9124	15.2559	15.2221	15.1055	15.1551	15.0388	15.1821	15.3536	15.7126	15.5888	15.752	15.4972	15.5442	15.5902	15.2956	Homo sapiens	774	>sp|P23921|RIR1_HUMAN Ribonucleoside-diphosphate reductase large subunit OS=Homo sapiens GN=RRM1 PE=1 SV=1	RRM1	90070.13	P23921	P23921	28	0
14.5826	14.7834	14.2762	14.5894	14.0974	14.8718	14.2431	13.9626	14.7002	14.7015	14.0677	14.4568	14.4089	14.6707	14.7217	14.041	13.8301	13.6815	Homo sapiens	775	>sp|P24390|ERD21_HUMAN ER lumen protein-retaining receptor 1 OS=Homo sapiens GN=KDELR1 PE=1 SV=1	KDELR1	24542.08	P24390	P24390	6	0
17.6046	17.7114	17.8022	17.3739	17.7358	17.7956	17.2221	17.8171	17.4916	17.8256	18.2351	18.5124	17.7875	17.9221	17.9952	17.8892	17.9279	17.2861	Homo sapiens	776	>sp|P24534|EF1B_HUMAN Elongation factor 1-beta OS=Homo sapiens GN=EEF1B2 PE=1 SV=3	EEF1B2	24763.72	P24534	P24534	10	0
16.7868	17.2604	17.356	16.8959	17.2931	17.3124	17.0632	17.3084	16.9097	17.0634	17.2466	17.0763	17.1058	17.4687	17.3187	17.1053	17.2851	17.2425	Homo sapiens	777	>sp|P24539|AT5F1_HUMAN ATP synthase F(0) complex subunit B1, mitochondrial OS=Homo sapiens GN=ATP5F1 PE=1 SV=2	ATP5F1	28908.63	P24539	P24539	6	0
7.70421	7.52143	12.4747	11.3472	11.4887	10.6433	13.0154	10.7941	10.4197	8.95957	8.89261	7.61016	12.2557	11.2143	12.0564	13.048	12.5593	13.7982	Homo sapiens	778	>sp|P24592|IBP6_HUMAN Insulin-like growth factor-binding protein 6 OS=Homo sapiens GN=IGFBP6 PE=1 SV=1	IGFBP6	25322.43	P24592	P24592	1	0
15.8627	15.9273	16.0588	15.9697	16.0032	16.105	15.9201	16.1153	16.0821	16.1593	16.4618	16.5824	16.3969	16.4432	16.4544	16.5347	16.7992	16.3607	Homo sapiens	779	>sp|P24666|PPAC_HUMAN Low molecular weight phosphotyrosine protein phosphatase OS=Homo sapiens GN=ACP1 PE=1 SV=3	ACP1	18042.48	P24666	P24666	6	0
15.4381	15.608	15.617	15.3831	15.4866	15.4866	15.5882	15.5653	15.4885	14.9756	14.8422	14.9728	14.7884	14.7573	14.6651	14.6157	14.7316	14.7174	Homo sapiens	780	>sp|P24752|THIL_HUMAN Acetyl-CoA acetyltransferase, mitochondrial OS=Homo sapiens GN=ACAT1 PE=1 SV=1	ACAT1	45199.55	P24752	P24752	9	0
13.599	13.7149	12.4669	13.6023	13.1978	13.6604	12.1331	12.5964	13.5982	13.3683	12.362	13.5769	13.5038	13.3238	11.9921	13.1818	12.2391	13.4203	Homo sapiens	781	>sp|P24928|RPB1_HUMAN DNA-directed RNA polymerase II subunit RPB1 OS=Homo sapiens GN=POLR2A PE=1 SV=2	POLR2A	217176.17	P24928	P24928	5	0
13.1719	13.0039	12.5377	13.1051	13.0983	12.9933	12.7043	12.9725	12.9415	11.8484	11.3174	11.6654	12.2764	12.6861	12.541	12.3122	12.0963	12.062	Homo sapiens	782	>sp|P24941|CDK2_HUMAN Cyclin-dependent kinase 2 OS=Homo sapiens GN=CDK2 PE=1 SV=2	CDK2	33929.53	P24941	P24941	6	0
17.1911	17.1416	17.1976	17.2253	17.0976	16.7877	16.9319	16.9223	17.1993	16.7777	16.337	16.4629	16.5564	16.8885	16.9224	16.7437	16.7466	16.6397	Homo sapiens	783	>sp|P25205|MCM3_HUMAN DNA replication licensing factor MCM3 OS=Homo sapiens GN=MCM3 PE=1 SV=3	MCM3	90980.79	P25205	P25205	24	0
14.5196	13.903	14.7283	14.4081	14.1649	14.7292	13.9498	14.439	13.8055	15.6845	15.8959	15.9036	15.7537	15.9518	15.8775	15.8452	16.0141	15.7914	Homo sapiens	784	>sp|P25398|RS12_HUMAN 40S ribosomal protein S12 OS=Homo sapiens GN=RPS12 PE=1 SV=3	RPS12	14514.93	P25398	P25398	8	0
12.0956	7.46886	7.14569	10.9545	12.9938	8.4312	9.31483	7.89498	7.0485	11.8692	12.4962	12.3925	11.8737	12.8938	13.2652	11.6415	12.2154	10.8372	Homo sapiens	785	>sp|P25490|TYY1_HUMAN Transcriptional repressor protein YY1 OS=Homo sapiens GN=YY1 PE=1 SV=2	YY1	44712.56	P25490	P25490	4	0
12.6468	12.2736	12.1157	12.9677	13.2262	12.6807	13.4771	13.0328	13.3257	13.1126	13.339	13.6735	13.9826	13.815	13.63	13.8729	14.3145	13.9148	Homo sapiens	786	>sp|P25685|DNJB1_HUMAN DnaJ homolog subfamily B member 1 OS=Homo sapiens GN=DNAJB1 PE=1 SV=4	DNAJB1	38044.11	P25685	P25685	9	0
17.9499	17.9754	17.8611	17.7844	17.6925	17.6949	17.6091	17.7463	17.8312	17.7557	17.588	17.3296	17.2204	17.5662	17.4042	17.1227	17.1086	17.447	Homo sapiens	787	>sp|P25705|ATPA_HUMAN ATP synthase subunit alpha, mitochondrial OS=Homo sapiens GN=ATP5A1 PE=1 SV=1	ATP5A1	59750.62	P25705	P25705	35	0
17.7421	17.833	17.9513	17.7519	18.033	18.1579	18.1229	18.0367	18.0713	18.103	18.3918	18.1281	18.0292	17.993	18.0525	18.1913	18.3481	18.3476	Homo sapiens	788	>sp|P25786|PSA1_HUMAN Proteasome subunit alpha type-1 OS=Homo sapiens GN=PSMA1 PE=1 SV=1	PSMA1	29555.59	P25786	P25786	24	0
15.5018	15.7154	16.0433	15.442	15.8347	15.968	15.6991	15.966	15.3333	15.5545	15.6914	15.6639	15.721	15.5691	15.7139	15.8419	15.9026	15.7625	Homo sapiens	789	>sp|P25787|PSA2_HUMAN Proteasome subunit alpha type-2 OS=Homo sapiens GN=PSMA2 PE=1 SV=2	PSMA2	25898.58	P25787	P25787	17	0
16.0199	16.1344	16.1466	16.0677	16.3052	16.479	16.3669	16.4108	16.3577	16.4095	16.7366	16.3901	16.35	16.2381	16.463	16.4428	16.6399	16.5555	Homo sapiens	790	>sp|P25788|PSA3_HUMAN Proteasome subunit alpha type-3 OS=Homo sapiens GN=PSMA3 PE=1 SV=2	PSMA3	28433.22	P25788	P25788	16	0
16.2137	16.3138	16.3875	16.1223	16.5572	16.5674	16.6506	16.5376	16.6	16.4659	16.6518	16.5653	16.3881	16.342	16.3712	16.4837	16.668	16.5631	Homo sapiens	791	>sp|P25789|PSA4_HUMAN Proteasome subunit alpha type-4 OS=Homo sapiens GN=PSMA4 PE=1 SV=1	PSMA4	29483.8	P25789	P25789	13	0
16.146	16.4053	16.3631	16.1657	16.6801	16.573	16.5267	16.7763	16.4704	16.9379	17.1665	17.1964	17.1523	17.0631	17.0444	17.5478	17.7202	17.5531	Homo sapiens	792	>sp|P26006|ITA3_HUMAN Integrin alpha-3 OS=Homo sapiens GN=ITGA3 PE=1 SV=5	ITGA3	116612.23	P26006	P26006	24	0
17.2255	17.2441	17.2709	17.2841	17.3151	17.4424	17.1942	17.2965	17.212	17.7673	17.832	17.8428	17.7744	17.5753	17.5724	17.7261	17.8266	17.8357	Homo sapiens	793	>sp|P26038|MOES_HUMAN Moesin OS=Homo sapiens GN=MSN PE=1 SV=3	MSN	67820.04	P26038	P26038	44	0
13.4968	13.5725	13.8155	13.801	13.9216	13.9555	13.7545	13.4147	13.4323	13.7617	13.9459	13.7466	13.558	13.5307	13.7226	13.6107	13.5104	13.4895	Homo sapiens	794	>sp|P26196|DDX6_HUMAN Probable ATP-dependent RNA helicase DDX6 OS=Homo sapiens GN=DDX6 PE=1 SV=2	DDX6	54416.8	P26196	P26196	11	0
12.2491	12.1587	11.835	12.1492	11.8955	11.7057	11.6206	11.826	11.6873	11.0326	10.5951	10.8445	11.444	11.4407	11.2477	10.3785	10.493	10.5998	Homo sapiens	795	>sp|P26358|DNMT1_HUMAN DNA (cytosine-5)-methyltransferase 1 OS=Homo sapiens GN=DNMT1 PE=1 SV=2	DNMT1	183165.22	P26358	P26358	17	0
14.5413	14.6405	14.879	14.4936	14.4421	14.6179	14.2937	14.4713	14.6561	15.0446	14.8289	15.1143	14.4632	14.3723	14.6356	14.6233	15.1605	14.4965	Homo sapiens	796	>sp|P26368|U2AF2_HUMAN Splicing factor U2AF 65 kDa subunit OS=Homo sapiens GN=U2AF2 PE=1 SV=4	U2AF2	53500.97	P26368	P26368	13	0
18.0097	18.0388	17.9224	18.0707	17.8215	17.6816	17.7267	17.7555	17.9547	16.2823	16.0059	16.117	16.1027	16.6351	16.5025	16.0849	16.0418	15.9569	Homo sapiens	797	>sp|P26373|RL13_HUMAN 60S ribosomal protein L13 OS=Homo sapiens GN=RPL13 PE=1 SV=4	RPL13	24261.47	P26373	P26373	18	0
8.36308	9.08709	9.63904	8.76696	8.59815	10.0101	8.06585	8.91971	8.58648	9.99715	9.62452	10.3725	10.5163	10.0063	9.98551	8.93052	9.43784	8.89828	Homo sapiens	798	>sp|P26440|IVD_HUMAN Isovaleryl-CoA dehydrogenase, mitochondrial OS=Homo sapiens GN=IVD PE=1 SV=1	IVD	46319.4	P26440	P26440	4	0
18.1191	18.2252	18.3903	18.0613	18.4563	18.4917	18.4933	18.4216	18.2996	18.8701	19.2248	18.8527	18.0461	18.1141	18.2213	18.178	18.5183	18.4016	Homo sapiens	799	>sp|P26447|S10A4_HUMAN Protein S100-A4 OS=Homo sapiens GN=S100A4 PE=1 SV=1	S100A4	11728.51	P26447	P26447	7	0
16.2425	16.1969	16.1491	16.3266	16.3932	16.4153	16.2291	16.2474	16.247	17.296	17.1443	17.1879	17.1071	16.9379	17.1385	17.443	17.4663	17.3709	Homo sapiens	800	>sp|P26583|HMGB2_HUMAN High mobility group protein B2 OS=Homo sapiens GN=HMGB2 PE=1 SV=2	HMGB2	24033.75	P26583	P26583	10	0
17.0803	17.4139	17.5375	17.1616	17.226	17.692	17.1764	17.2808	17.1594	17.8277	18.0271	17.6596	17.8084	17.6214	17.6395	17.7989	17.9509	18.2181	Homo sapiens	801	>sp|P26599|PTBP1_HUMAN Polypyrimidine tract-binding protein 1 OS=Homo sapiens GN=PTBP1 PE=1 SV=1	PTBP1	57221.32	P26599	P26599	16	0
16.1405	16.3253	16.1483	16.2396	16.3068	16.1418	16.1292	16.1693	16.2574	15.1989	15.012	15.2453	15.2197	15.6948	15.4497	15.368	15.2308	15.1671	Homo sapiens	802	>sp|P26639|SYTC_HUMAN Threonine--tRNA ligase, cytoplasmic OS=Homo sapiens GN=TARS PE=1 SV=3	TARS	83435.09	P26639	P26639	23	0
16.3473	16.2908	16.0977	16.2983	16.1684	15.8321	15.9375	16.03	16.2348	14.4152	14.2998	14.3862	14.4855	14.7142	14.787	14.3724	14.2328	14.0868	Homo sapiens	803	>sp|P26640|SYVC_HUMAN Valine--tRNA ligase OS=Homo sapiens GN=VARS PE=1 SV=4	VARS	140476.01	P26640	P26640	36	0
18.6154	18.8108	19.0327	18.53	18.9518	19.1116	18.8437	19.0964	18.7264	19.0752	19.4493	19.4962	19.1484	19.017	19.0273	19.2376	19.4508	19.1657	Homo sapiens	804	>sp|P26641|EF1G_HUMAN Elongation factor 1-gamma OS=Homo sapiens GN=EEF1G PE=1 SV=3	EEF1G	50118.81	P26641	P26641	34	0
12.4621	12.7028	13.0661	13.1014	13.2146	13.2609	13.8087	13.3771	13.3291	13.2309	13.3662	13.4143	13.9462	13.729	13.6353	13.816	13.9423	13.9657	Homo sapiens	805	>sp|P26885|FKBP2_HUMAN Peptidyl-prolyl cis-trans isomerase FKBP2 OS=Homo sapiens GN=FKBP2 PE=1 SV=2	FKBP2	15649.26	P26885	P26885	4	0
14.5232	14.4087	14.6092	15.1112	15.6295	15.2179	15.3969	15.6475	15.4117	14.5853	14.1447	12.7203	15.0238	15.5838	15.899	14.9512	15.1097	16.0799	Homo sapiens	806	>sp|P27105|STOM_HUMAN Erythrocyte band 7 integral membrane protein OS=Homo sapiens GN=STOM PE=1 SV=3	STOM	31730.79	P27105	P27105	5	0
13.297	13.3373	13.292	13.244	13.4326	13.3541	13.4165	13.2305	13.2884	12.5746	12.3881	11.8011	12.3176	12.6681	12.7513	12.4141	12.1395	12.6986	Homo sapiens	807	>sp|P27144|KAD4_HUMAN Adenylate kinase 4, mitochondrial OS=Homo sapiens GN=AK4 PE=1 SV=1	AK4	25268.02	P27144	P27144	10	0
17.9984	17.845	18.1278	17.8994	17.8633	18.0944	17.7393	18.0617	17.8123	18.4844	18.5888	18.5158	18.2738	18.2335	18.4397	18.3975	18.3819	18.2244	Homo sapiens	808	>sp|P27348|1433T_HUMAN 14-3-3 protein theta OS=Homo sapiens GN=YWHAQ PE=1 SV=1	YWHAQ	27764.24	P27348	P27348	14	0
11.6552	11.2767	11.9986	12.1019	12.8532	12.9149	12.4178	11.8276	12.0158	11.8852	12.2223	12.4912	12.5303	12.1293	12.2294	12.0941	12.267	11.8435	Homo sapiens	809	>sp|P27361|MK03_HUMAN Mitogen-activated protein kinase 3 OS=Homo sapiens GN=MAPK3 PE=1 SV=4	MAPK3	43135.57	P27361	P27361	6	0
10.3209	8.01341	8.11458	10.0661	8.06713	6.62197	8.56937	6.9008	7.69325	7.95413	7.76017	7.76501	8.40249	8.37129	8.44708	8.52733	7.0649	7.82807	Homo sapiens	810	>sp|P27448|MARK3_HUMAN MAP/microtubule affinity-regulating kinase 3 OS=Homo sapiens GN=MARK3 PE=1 SV=4	MARK3	84488.6	P27448	P27448	1	0.003492063
8.85806	10.1628	10.0203	9.39192	9.90523	8.97208	8.76241	10.7779	6.01264	10.5929	10.3565	9.73523	9.43013	8.93222	8.7422	9.18807	8.57194	10.0584	Homo sapiens	811	>sp|P27487|DPP4_HUMAN Dipeptidyl peptidase 4 OS=Homo sapiens GN=DPP4 PE=1 SV=2	DPP4	88278.63	P27487	P27487	4	0
17.8547	17.7204	17.7643	17.9576	17.5233	17.4273	17.178	17.5453	17.6723	15.2872	15.0189	15.2432	15.7497	16.2876	15.7962	15.8732	15.6867	15.9122	Homo sapiens	812	>sp|P27635|RL10_HUMAN 60S ribosomal protein L10 OS=Homo sapiens GN=RPL10 PE=1 SV=4	RPL10	24603.89	P27635	P27635	15	0
13.6964	13.6752	13.4347	13.56	13.5023	13.9529	14.2656	13.6081	13.6617	15.0612	15.0125	15.3041	15.1478	15.0937	14.7824	14.8192	14.8686	14.915	Homo sapiens	813	>sp|P27694|RFA1_HUMAN Replication protein A 70 kDa DNA-binding subunit OS=Homo sapiens GN=RPA1 PE=1 SV=2	RPA1	68138.19	P27694	P27694	16	0
15.3252	15.3551	15.4108	15.4393	15.4628	15.5768	15.1817	15.435	15.2477	15.774	16.0639	16.1116	15.879	15.6372	15.5671	15.9256	16.0614	15.9919	Homo sapiens	814	>sp|P27695|APEX1_HUMAN DNA-(apurinic or apyrimidinic site) lyase OS=Homo sapiens GN=APEX1 PE=1 SV=2	APEX1	35554.5	P27695	P27695	7	0
15.1872	15.1552	14.9886	15.181	14.9376	14.5595	14.7885	14.8457	15.0593	13.4607	13.2292	13.7953	13.5456	13.9763	13.4629	13.5029	13.4893	13.3437	Homo sapiens	815	>sp|P27708|PYR1_HUMAN CAD protein OS=Homo sapiens GN=CAD PE=1 SV=3	CAD	242983.72	P27708	P27708	47	0
18.8556	18.9709	18.992	18.9434	19.3075	19.2822	19.3271	19.2723	19.2137	19.6465	19.7658	19.4901	19.4433	19.1971	19.4399	19.5904	19.6864	19.7347	Homo sapiens	816	>sp|P27797|CALR_HUMAN Calreticulin OS=Homo sapiens GN=CALR PE=1 SV=1	CALR	48141.56	P27797	P27797	39	0
16.2935	16.0676	15.7547	16.4336	17.1448	16.3725	16.9851	16.572	17.0836	14.3853	15.149	16.4151	15.1296	14.9594	15.875	18.3278	18.6027	15.9868	Homo sapiens	817	>sp|P27816|MAP4_HUMAN Microtubule-associated protein 4 OS=Homo sapiens GN=MAP4 PE=1 SV=3	MAP4	121004.97	P27816	P27816	38	0
18.9571	19.0869	19.1016	19.0596	19.2694	19.3419	19.3483	19.2394	19.2918	19.6216	19.8397	19.5336	19.6676	19.5371	19.4754	19.6529	19.7551	20.0279	Homo sapiens	818	>sp|P27824|CALX_HUMAN Calnexin OS=Homo sapiens GN=CANX PE=1 SV=2	CANX	67568.3	P27824	P27824	36	0
13.6639	13.2453	13.9304	12.7251	13.4633	12.839	12.8812	13.0465	13.2136	13.3506	13.759	14.8122	14.2669	16.7061	14.3564	13.5962	14.0029	13.6722	Homo sapiens	819	>sp|P28062|PSB8_HUMAN Proteasome subunit beta type-8 OS=Homo sapiens GN=PSMB8 PE=1 SV=3	PSMB8	30354.26	P28062	P28062	3	0
15.5958	15.6493	15.6029	15.6531	15.7579	15.5363	15.7182	15.7589	15.4316	16.0903	16.3209	16.3241	16.0993	15.8268	15.9844	16.0878	16.2794	16.0438	Homo sapiens	820	>sp|P28066|PSA5_HUMAN Proteasome subunit alpha type-5 OS=Homo sapiens GN=PSMA5 PE=1 SV=3	PSMA5	26411.03	P28066	P28066	11	0
15.1381	15.4425	15.3666	15.2782	15.8726	15.7774	15.8987	15.6516	15.7338	15.2343	15.8627	15.5327	15.7913	15.3739	15.6254	15.7019	15.7871	15.7176	Homo sapiens	821	>sp|P28070|PSB4_HUMAN Proteasome subunit beta type-4 OS=Homo sapiens GN=PSMB4 PE=1 SV=4	PSMB4	29204.23	P28070	P28070	5	0
16.6123	16.7895	16.9652	16.7803	17.1848	17.2754	16.9417	17.103	17.1031	16.9484	17.3198	17.0684	17.2857	16.9869	17.2967	17.2975	17.4605	17.2843	Homo sapiens	822	>sp|P28072|PSB6_HUMAN Proteasome subunit beta type-6 OS=Homo sapiens GN=PSMB6 PE=1 SV=4	PSMB6	25357.71	P28072	P28072	4	0
16.3327	16.5584	16.6248	16.3064	16.8258	16.7822	16.6181	16.7407	16.6677	15.9941	16.3041	16.2148	16.0479	15.9711	16.155	16.1214	16.2698	15.9845	Homo sapiens	823	>sp|P28074|PSB5_HUMAN Proteasome subunit beta type-5 OS=Homo sapiens GN=PSMB5 PE=1 SV=3	PSMB5	28480.27	P28074	P28074	13	0
13.6486	13.3729	13.8261	13.8816	13.9356	13.7275	13.6246	13.0968	14.0447	11.7409	11.4416	10.4408	11.1811	11.8594	10.821	11.613	11.045	13.1787	Homo sapiens	824	>sp|P28288|ABCD3_HUMAN ATP-binding cassette sub-family D member 3 OS=Homo sapiens GN=ABCD3 PE=1 SV=1	ABCD3	75475.92	P28288	P28288	10	0
12.2847	12.1481	12.8522	11.8433	11.8784	11.951	11.7288	12.1767	11.056	12.0285	11.831	10.9152	12.3677	12.5307	12.1713	11.323	10.9375	12.4228	Homo sapiens	825	>sp|P28331|NDUS1_HUMAN NADH-ubiquinone oxidoreductase 75 kDa subunit, mitochondrial OS=Homo sapiens GN=NDUFS1 PE=1 SV=3	NDUFS1	79467.5	P28331	P28331	7	0
11.4893	11.1474	11.0717	11.771	11.4279	11.0978	11.7895	11.4582	10.4407	10.1578	9.85031	8.98814	10.8017	11.015	11.4174	10.2029	10.0193	10.6179	Homo sapiens	826	>sp|P28340|DPOD1_HUMAN DNA polymerase delta catalytic subunit OS=Homo sapiens GN=POLD1 PE=1 SV=2	POLD1	123631.13	P28340	P28340	7	0
8.21354	8.67855	9.98426	7.72299	7.69399	7.77127	9.07963	7.82891	7.90154	8.53748	8.27926	8.41798	10.0386	9.59182	8.81842	7.96623	9.1183	9.52942	Homo sapiens	827	>sp|P28370|SMCA1_HUMAN Probable global transcription activator SNF2L1 OS=Homo sapiens GN=SMARCA1 PE=1 SV=2	SMARCA1	122604.7	P28370	P28370	3	0
15.5484	15.5586	15.8335	15.5458	15.825	15.8449	15.7063	15.9109	15.7997	16.3279	16.8119	16.9719	16.7751	16.5357	16.5722	16.8305	17.0231	16.608	Homo sapiens	828	>sp|P28482|MK01_HUMAN Mitogen-activated protein kinase 1 OS=Homo sapiens GN=MAPK1 PE=1 SV=3	MAPK1	41389.7	P28482	P28482	19	0
11.3224	10.1928	11.0675	10.2533	12.256	10.2988	10.5259	10.866	11.8261	10.2707	7.49881	11.9478	11.2459	12.6355	11.0851	10.7209	10.9227	8.61429	Homo sapiens	829	>sp|P28715|ERCC5_HUMAN DNA repair protein complementing XP-G cells OS=Homo sapiens GN=ERCC5 PE=1 SV=3;>tr|R4GMW8|R4GMW8_HUMAN Protein BIVM-ERCC5 (Fragment) OS=Homo sapiens GN=BIVM-ERCC5 PE=4 SV=1	ERCC5;BIVM-ERCC5	133108.48;NaN	P28715;R4GMW8	P28715;R4GMW8	3	0
15.0961	15.2464	15.4291	15.1663	15.3987	15.5106	15.4642	15.4103	15.0418	16.1433	16.3348	16.1914	16.0783	15.6463	15.7682	15.918	15.9406	16.0711	Homo sapiens	830	>sp|P28838|AMPL_HUMAN Cytosol aminopeptidase OS=Homo sapiens GN=LAP3 PE=1 SV=3	LAP3	56166.34	P28838	P28838	22	0
13.3901	14.2002	14.7212	13.6837	14.4713	14.67	13.8137	14.24	14.5918	8.52569	14.1985	13.6195	14.4158	14.5686	13.225	14.4511	14.7618	13.6162	Homo sapiens	831	>sp|P29034|S10A2_HUMAN Protein S100-A2 OS=Homo sapiens GN=S100A2 PE=1 SV=3	S100A2	11116.76	P29034	P29034	1	0.000342818
11.3263	10.3742	8.63615	11.3465	11.7132	10.7987	10.6752	11.3813	10.7591	11.5012	8.78436	9.93261	9.26882	8.48591	9.70599	11.4825	11.4718	10.8587	Homo sapiens	832	>sp|P29083|T2EA_HUMAN General transcription factor IIE subunit 1 OS=Homo sapiens GN=GTF2E1 PE=1 SV=2	GTF2E1	49452.13	P29083	P29083	2	0
16.2958	16.2139	16.1681	16.2744	16.2123	16.03	16.2107	16.0802	16.365	15.5586	15.5848	15.7216	15.7877	16.0912	15.6593	15.4897	15.5079	15.629	Homo sapiens	833	>sp|P29144|TPP2_HUMAN Tripeptidyl-peptidase 2 OS=Homo sapiens GN=TPP2 PE=1 SV=4	TPP2	138349.87	P29144	P29144	25	0
11.7168	12.1411	12.2771	11.9805	11.9813	13.1747	12.7017	12.3889	12.8412	12.4672	13.3559	12.9307	13.7495	13.4771	13.1613	13.1	13.1287	13.5472	Homo sapiens	834	>sp|P29218|IMPA1_HUMAN Inositol monophosphatase 1 OS=Homo sapiens GN=IMPA1 PE=1 SV=1	IMPA1	30188.8	P29218	P29218	6	0
10.8894	11.3596	11.1834	11.3453	11.7099	11.6658	11.6132	11.3411	11.4185	10.9995	11.0311	11.9593	12.0575	11.7173	11.5969	11.9698	11.7908	11.2268	Homo sapiens	835	>sp|P29317|EPHA2_HUMAN Ephrin type-A receptor 2 OS=Homo sapiens GN=EPHA2 PE=1 SV=2	EPHA2	108266.41	P29317	P29317	7	0
7.72999	9.18185	9.19877	9.04859	9.1799	9.84576	11.2192	9.26749	6.34634	10.0849	9.60782	9.59706	9.34348	10.4483	9.90642	10.6423	11.0524	11.0861	Homo sapiens	836	>sp|P29323|EPHB2_HUMAN Ephrin type-B receptor 2 OS=Homo sapiens GN=EPHB2 PE=1 SV=5	EPHB2	117492.66	P29323	P29323	3	0.000342818
9.55114	6.92321	8.67283	10.2419	6.93686	7.40379	10.8702	6.2767	7.97168	8.32675	6.74628	9.60961	6.66099	7.87323	7.70487	8.71725	8.86735	7.56931	Homo sapiens	837	>sp|P29375|KDM5A_HUMAN Lysine-specific demethylase 5A OS=Homo sapiens GN=KDM5A PE=1 SV=3	KDM5A	192095.34	P29375	P29375	1	0.001002674
17.5209	17.8052	17.8731	17.8283	18.3277	18.3244	18.4467	18.2083	18.2724	18.2141	18.6828	18.624	18.9315	18.7629	18.6667	18.9103	19.1023	19.0113	Homo sapiens	838	>sp|P29401|TKT_HUMAN Transketolase OS=Homo sapiens GN=TKT PE=1 SV=3	TKT	67877.63	P29401	P29401	36	0
11.793	12.1619	10.7636	11.9678	11.7176	12.3534	10.5251	11.809	11.7027	13.5336	12.7721	12.5721	12.8234	12.2588	13.4624	11.6263	11.5049	11.2251	Homo sapiens	839	>sp|P29590|PML_HUMAN Protein PML OS=Homo sapiens GN=PML PE=1 SV=3	PML	97550.58	P29590	P29590	8	0
17.1067	17.1131	16.8654	17.1643	17.3954	17.0979	17.3194	17.2996	17.2958	15.7493	16.2019	16.7176	16.4717	16.472	16.6732	17.6793	17.8157	16.8041	Homo sapiens	840	>sp|P29692|EF1D_HUMAN Elongation factor 1-delta OS=Homo sapiens GN=EEF1D PE=1 SV=5	EEF1D	31121.83	P29692	P29692	12	0
11.7645	11.1054	9.62258	11.95	12.3611	10.6518	13.5175	11.8225	12.5134	10.3062	10.1134	10.9202	11.5268	11.0472	11.1582	13.968	13.9122	13.3586	Homo sapiens	841	>sp|P29966|MARCS_HUMAN Myristoylated alanine-rich C-kinase substrate OS=Homo sapiens GN=MARCKS PE=1 SV=4	MARCKS	31554.66	P29966	P29966	5	0
14.3193	14.6248	14.4697	14.4297	14.8611	14.1704	13.578	14.2562	14.4312	13.5229	13.276	13.2078	13.3889	13.6667	13.9334	13.5056	13.463	13.2703	Homo sapiens	842	>sp|P29992|GNA11_HUMAN Guanine nucleotide-binding protein subunit alpha-11 OS=Homo sapiens GN=GNA11 PE=1 SV=2	GNA11	42123.33	P29992	P29992	5	0
13.4231	12.9943	13.5389	13.1835	13.4343	13.1874	13.5886	13.2144	13.0876	13.7305	13.7408	13.7543	13.4599	13.2334	13.4661	13.1092	12.9812	12.9071	Homo sapiens	843	>sp|P30038|AL4A1_HUMAN Delta-1-pyrroline-5-carboxylate dehydrogenase, mitochondrial OS=Homo sapiens GN=ALDH4A1 PE=1 SV=3	ALDH4A1	61719.47	P30038	P30038	8	0
8.7034	8.31227	6.46379	9.26706	8.61618	8.99761	6.78097	8.95232	7.83841	8.19964	8.28541	7.48969	8.54185	9.1611	9.13774	7.77998	8.11067	8.41189	Homo sapiens	844	>sp|P30039|PBLD_HUMAN Phenazine biosynthesis-like domain-containing protein OS=Homo sapiens GN=PBLD PE=1 SV=2	PBLD	31785.27	P30039	P30039	2	0
14.3378	14.1572	14.49	14.4579	14.781	14.6906	14.9335	14.6671	14.6289	15.0144	14.9926	15.3617	15.551	15.4868	15.3382	15.4575	15.6878	15.3951	Homo sapiens	845	>sp|P30040|ERP29_HUMAN Endoplasmic reticulum resident protein 29 OS=Homo sapiens GN=ERP29 PE=1 SV=4	ERP29	28993.43	P30040	P30040	13	0
18.217	18.1846	18.2214	18.2269	18.3131	18.3229	18.2895	18.2737	18.4445	18.5776	18.6038	18.5815	18.0815	18.2056	18.1139	18.2138	18.2757	18.2836	Homo sapiens	846	>sp|P30041|PRDX6_HUMAN Peroxiredoxin-6 OS=Homo sapiens GN=PRDX6 PE=1 SV=3	PRDX6	25034.98	P30041	P30041	21	0
14.3543	14.4966	14.4421	14.471	14.9202	14.9897	14.9569	14.7448	14.6975	14.8532	15.1027	15.0869	15.2838	14.9527	14.9907	15.2508	15.325	15.3066	Homo sapiens	847	>sp|P30043|BLVRB_HUMAN Flavin reductase (NADPH) OS=Homo sapiens GN=BLVRB PE=1 SV=3	BLVRB	22119.34	P30043	P30043	6	0
14.1312	14.184	14.5137	14.2941	14.6187	14.7782	14.8503	14.7103	14.5608	14.8144	15.3258	15.0389	15.5144	14.9496	15.2423	15.3649	15.51	15.4584	Homo sapiens	848	>sp|P30044|PRDX5_HUMAN Peroxiredoxin-5, mitochondrial OS=Homo sapiens GN=PRDX5 PE=1 SV=4	PRDX5	22086.43	P30044	P30044	9	0
9.97629	10.0054	9.69409	9.77894	10.4469	10.436	10.3416	9.98969	9.28749	12.5668	12.906	11.1423	11.7226	11.7918	12.4075	13.2217	11.3341	13.2216	Homo sapiens	849	>sp|P30046|DOPD_HUMAN D-dopachrome decarboxylase OS=Homo sapiens GN=DDT PE=1 SV=3	DDT	12711.76	P30046	P30046	1	0
17.1394	17.3786	17.4658	17.3126	17.6202	17.7418	17.6091	17.7701	17.661	17.9388	18.5226	17.9786	17.9271	17.8622	18.0823	18.055	18.2504	18.2171	Homo sapiens	850	>sp|P30048|PRDX3_HUMAN Thioredoxin-dependent peroxide reductase, mitochondrial OS=Homo sapiens GN=PRDX3 PE=1 SV=3	PRDX3	27692.65	P30048	P30048	6	0
14.8246	15.1219	15.247	14.7995	14.8059	15.1711	14.7318	15.0252	14.6902	14.9586	15.3675	15.2409	14.7942	14.6974	14.6368	14.9876	14.9064	14.9782	Homo sapiens	851	>sp|P30049|ATPD_HUMAN ATP synthase subunit delta, mitochondrial OS=Homo sapiens GN=ATP5D PE=1 SV=2	ATP5D	17489.95	P30049	P30049	1	0.001609788
17.494	17.7944	17.6948	17.5704	17.4564	17.6947	17.2454	17.4634	17.6502	16.8436	17.3927	17.4211	17.1379	17.3536	16.9026	16.9995	17.3135	17.1967	Homo sapiens	852	>sp|P30050|RL12_HUMAN 60S ribosomal protein L12 OS=Homo sapiens GN=RPL12 PE=1 SV=1	RPL12	17818.58	P30050	P30050	10	0
15.1352	15.3721	15.136	14.994	15.4526	15.1424	15.2722	15.3988	14.9614	16.1194	16.031	15.9894	15.716	15.067	15.5819	15.7678	15.853	15.7058	Homo sapiens	853	>sp|P30084|ECHM_HUMAN Enoyl-CoA hydratase, mitochondrial OS=Homo sapiens GN=ECHS1 PE=1 SV=4	ECHS1	31387.38	P30084	P30084	11	0
12.5499	12.3084	12.127	12.4803	12.5618	12.3139	12.7248	12.1591	12.2003	13.3118	13.1063	13.1997	13.2425	12.8644	13.0381	13.048	12.9812	13.0392	Homo sapiens	854	>sp|P30085|KCY_HUMAN UMP-CMP kinase OS=Homo sapiens GN=CMPK1 PE=1 SV=3	CMPK1	22222.33	P30085	P30085	8	0
14.7074	15.1858	15.1827	14.8844	15.1011	15.5241	14.8276	15.5675	15.6991	17.009	17.7528	16.6507	17.3749	17.0564	18.0553	17.1164	17.5138	17.2056	Homo sapiens	855	>sp|P30086|PEBP1_HUMAN Phosphatidylethanolamine-binding protein 1 OS=Homo sapiens GN=PEBP1 PE=1 SV=3	PEBP1	21056.78	P30086	P30086	6	0
17.9652	17.9753	18.1389	17.9069	18.259	18.3742	18.3166	18.3026	18.2371	18.9245	19.1353	18.8531	18.7805	18.4674	18.7047	18.7624	18.8241	18.8893	Homo sapiens	856	>sp|P30101|PDIA3_HUMAN Protein disulfide-isomerase A3 OS=Homo sapiens GN=PDIA3 PE=1 SV=4	PDIA3	56782.38	P30101	P30101	44	0
16.6151	16.8179	16.6913	16.5289	16.7837	16.7291	16.4614	16.6929	16.8297	16.2992	16.3227	16.1998	16.2076	16.6557	16.6138	16.1447	16.3481	16.1755	Homo sapiens	857	>sp|P30153|2AAA_HUMAN Serine/threonine-protein phosphatase 2A 65 kDa regulatory subunit A alpha isoform OS=Homo sapiens GN=PPP2R1A PE=1 SV=4	PPP2R1A	65308.58	P30153	P30153	28	0
10.3337	10.1241	10.3674	10.3039	10.3037	11.0625	9.22766	11.0589	9.52581	10.6638	10.424	10.0616	11.1206	11.1025	10.8341	10.3674	10.1558	11.0214	Homo sapiens	858	>sp|P30154|2AAB_HUMAN Serine/threonine-protein phosphatase 2A 65 kDa regulatory subunit A beta isoform OS=Homo sapiens GN=PPP2R1B PE=1 SV=3	PPP2R1B	66213.52	P30154	P30154	4	0
7.63713	6.17913	10.1607	9.89904	9.16643	9.23456	7.41437	7.89113	7.29971	10.3245	5.74015	9.88178	10.4241	11.1233	11.1438	10.44	9.21691	7.60884	Homo sapiens	859	>sp|P30260|CDC27_HUMAN Cell division cycle protein 27 homolog OS=Homo sapiens GN=CDC27 PE=1 SV=2	CDC27	91867.33	P30260	P30260	2	0
15.5109	16.1268	15.9921	15.8597	16.2642	16.0733	16.4123	15.9181	16.2643	16.5617	17.2883	16.4034	16.1035	15.8374	16.0999	16.4757	16.9793	17.1197	Homo sapiens	860	>sp|P30405|PPIF_HUMAN Peptidyl-prolyl cis-trans isomerase F, mitochondrial OS=Homo sapiens GN=PPIF PE=1 SV=1	PPIF	22040.24	P30405	P30405	5	0.000342818
13.2789	13.8412	13.8498	14.3562	14.8076	14.4525	14.5141	14.4689	14.6061	14.0349	14.5453	14.2349	15.4059	15.1589	15.0774	15.2155	15.172	15.4539	Homo sapiens	861	>sp|P30408|T4S1_HUMAN Transmembrane 4 L6 family member 1 OS=Homo sapiens GN=TM4SF1 PE=1 SV=1	TM4SF1	21632.29	P30408	P30408	2	0
13.9541	14.0738	13.9519	14.1091	14.4097	14.5916	14.6167	14.2945	14.5192	14.4513	14.5866	15.059	15.1085	14.9491	14.7724	15.1281	15.4048	14.9828	Homo sapiens	862	>sp|P30419|NMT1_HUMAN Glycylpeptide N-tetradecanoyltransferase 1 OS=Homo sapiens GN=NMT1 PE=1 SV=2	NMT1	56806.18	P30419	P30419	16	0
13.2159	13.8703	13.06	14.1707	14.1205	13.212	14.2453	13.6678	14.0306	13.6527	14.9173	14.4726	14.4451	14.3126	14.1617	14.3319	14.1165	14.2538	Homo sapiens	863	>sp|P30519|HMOX2_HUMAN Heme oxygenase 2 OS=Homo sapiens GN=HMOX2 PE=1 SV=2	HMOX2	36032.87	P30519	P30519	6	0
12.6879	12.8819	13.0514	12.8697	13.0307	12.8244	12.6936	12.8429	12.5501	13.4854	13.2224	13.392	13.4722	13.4896	13.54	13.3287	13.2885	13.2115	Homo sapiens	864	>sp|P30520|PURA2_HUMAN Adenylosuccinate synthetase isozyme 2 OS=Homo sapiens GN=ADSS PE=1 SV=3	ADSS	50097.36	P30520	P30520	9	0
16.0538	16.296	16.3269	16.2251	16.5418	16.5225	16.61	16.4925	16.4501	15.6237	16.3042	16.1835	16.8758	16.7537	16.7415	17.0655	17.2802	17.0266	Homo sapiens	865	>sp|P30533|AMRP_HUMAN Alpha-2-macroglobulin receptor-associated protein OS=Homo sapiens GN=LRPAP1 PE=1 SV=1	LRPAP1	41465.99	P30533	P30533	14	0
12.8817	12.5746	12.8171	12.8091	12.9369	12.7931	13.1098	12.8597	12.7354	12.5471	12.41	12.6662	12.126	12.047	12.0681	12.2969	12.1769	12.0676	Homo sapiens	866	>sp|P30566|PUR8_HUMAN Adenylosuccinate lyase OS=Homo sapiens GN=ADSL PE=1 SV=2	ADSL	54889.27	P30566	P30566	10	0
10.8393	12.1502	11.6785	12.4957	12.2707	12.7169	12.3452	12.3502	13.0521	12.9047	12.8306	13.2833	13.1894	13.1806	12.962	13.3333	13.2207	13.0843	Homo sapiens	867	>sp|P30622|CLIP1_HUMAN CAP-Gly domain-containing linker protein 1 OS=Homo sapiens GN=CLIP1 PE=1 SV=2	CLIP1	162246.31	P30622	P30622	11	0
11.5299	11.5294	11.6844	11.3087	11.2247	11.5894	11.3941	11.5451	11.1865	12.6059	12.8001	11.9382	12.5457	11.4023	12.1779	11.8534	11.7875	12.3814	Homo sapiens	868	>sp|P30626|SORCN_HUMAN Sorcin OS=Homo sapiens GN=SRI PE=1 SV=1	SRI	21676.38	P30626	P30626	5	0
14.9849	14.8062	14.9953	14.9916	15.0921	14.7974	14.8685	15.1034	15.3052	13.425	13.3624	14.3382	14.4973	14.948	14.5311	14.8386	14.6891	14.0109	Homo sapiens	869	>sp|P30740|ILEU_HUMAN Leukocyte elastase inhibitor OS=Homo sapiens GN=SERPINB1 PE=1 SV=1	SERPINB1	42741.8	P30740	P30740	4	0
11.2325	12.5189	12.2319	11.3018	11.936	11.7261	11.7751	12.0788	11.1318	12.2507	12.2986	12.1581	11.7991	11.9391	11.8073	12.6526	11.3488	12.1792	Homo sapiens	870	>sp|P30825|CTR1_HUMAN High affinity cationic amino acid transporter 1 OS=Homo sapiens GN=SLC7A1 PE=1 SV=1	SLC7A1	67638.36	P30825	P30825	3	0
12.7016	12.419	12.8354	12.9819	12.5587	12.1946	12.3032	12.5197	12.1557	13.1409	13.0115	12.8666	12.1073	12.3441	12.0293	11.7528	11.7049	12.1349	Homo sapiens	871	>sp|P30837|AL1B1_HUMAN Aldehyde dehydrogenase X, mitochondrial OS=Homo sapiens GN=ALDH1B1 PE=1 SV=3	ALDH1B1	57206.31	P30837	P30837	12	0
11.7821	11.6429	11.9332	11.9812	12.494	11.2592	11.236	12.0849	12.3493	10.3234	10.2699	10.3943	10.3271	10.8878	11.1625	9.70087	11.086	9.74078	Homo sapiens	872	>sp|P30876|RPB2_HUMAN DNA-directed RNA polymerase II subunit RPB2 OS=Homo sapiens GN=POLR2B PE=1 SV=1	POLR2B	133896.57	P30876	P30876	6	0
14.7413	14.5661	14.6773	14.499	14.3012	14.4446	13.9032	14.4876	14.3316	15.0484	15.0423	14.7738	14.7292	14.8739	14.8974	14.4158	14.6104	14.6887	Homo sapiens	873	>sp|P31040|SDHA_HUMAN Succinate dehydrogenase [ubiquinone] flavoprotein subunit, mitochondrial OS=Homo sapiens GN=SDHA PE=1 SV=2	SDHA	72691.51	P31040	P31040	11	0
13.1999	12.9198	13.0236	12.9271	13.0179	13.3631	12.9417	13.233	13.2964	12.999	12.9476	13.3196	13.1596	12.6653	12.8955	12.6755	12.8973	12.457	Homo sapiens	874	>sp|P31150|GDIA_HUMAN Rab GDP dissociation inhibitor alpha OS=Homo sapiens GN=GDI1 PE=1 SV=2	GDI1	50582.72	P31150	P31150	9	0
16.2499	16.2457	16.3508	16.0785	16.1886	16.1971	15.9503	16.3168	16.0308	15.9038	15.818	16.2008	16.284	16.226	16.2221	16.3466	16.4491	16.0908	Homo sapiens	875	>sp|P31153|METK2_HUMAN S-adenosylmethionine synthase isoform type-2 OS=Homo sapiens GN=MAT2A PE=1 SV=1	MAT2A	43660.67	P31153	P31153	21	0
9.63431	10.3964	10.0125	8.15658	11.025	9.29049	9.57533	9.44672	8.52358	10.3491	10.7761	9.90139	10.8182	11.9313	11.5737	10.1145	9.62285	10.331	Homo sapiens	876	>sp|P31323|KAP3_HUMAN cAMP-dependent protein kinase type II-beta regulatory subunit OS=Homo sapiens GN=PRKAR2B PE=1 SV=3	PRKAR2B	46302.08	P31323	P31323	4	0
13.6173	13.4468	13.7865	13.8353	13.9415	13.9938	13.8485	14.0166	13.7256	12.6835	12.9301	13.9228	14.4903	14.2806	13.6989	14.5222	14.4599	14.0616	Homo sapiens	877	>sp|P31350|RIR2_HUMAN Ribonucleoside-diphosphate reductase subunit M2 OS=Homo sapiens GN=RRM2 PE=1 SV=1	RRM2	44877.68	P31350	P31350	13	0
7.80344	12.2512	12.7006	11.819	13.1898	13.3053	13.9888	13.3011	13.1489	7.99731	10.9317	9.75468	14.1909	13.5714	13.8335	14.4626	14.5219	14.2497	Homo sapiens	878	>sp|P31431|SDC4_HUMAN Syndecan-4 OS=Homo sapiens GN=SDC4 PE=1 SV=2	SDC4	21641.56	P31431	P31431	2	0
13.5295	13.2434	13.093	11.6703	14.1996	14.1219	14.0673	13.9388	14.4615	14.5196	14.4842	14.1593	13.9968	14.9135	14.2909	14.203	14.4089	14.8129	Homo sapiens	879	>sp|P31641|SC6A6_HUMAN Sodium- and chloride-dependent taurine transporter OS=Homo sapiens GN=SLC6A6 PE=1 SV=2	SLC6A6	69830.05	P31641	P31641	1	0
16.3786	16.6415	16.5653	16.6128	16.5289	16.6497	16.4554	16.5451	16.5459	15.8791	16.0185	16.221	16.4603	16.6651	16.2216	16.497	16.6984	16.6665	Homo sapiens	880	>sp|P31689|DNJA1_HUMAN DnaJ homolog subfamily A member 1 OS=Homo sapiens GN=DNAJA1 PE=1 SV=2	DNAJA1	44868.18	P31689	P31689	14	0
10.0882	10.5983	10.5954	10.9495	10.7192	10.1634	10.3047	10.5229	10.0217	9.61315	9.6544	9.37415	9.74604	9.97212	9.44821	10.0083	8.78519	10.0672	Homo sapiens	881	>sp|P31749|AKT1_HUMAN RAC-alpha serine/threonine-protein kinase OS=Homo sapiens GN=AKT1 PE=1 SV=2	AKT1	55686.41	P31749	P31749	4	0
16.9095	16.713	17.3288	16.5559	16.4233	16.3174	16.4833	16.4051	16.2845	16.7862	16.2848	16.2704	17.0812	17.0374	17.0694	16.3587	16.3597	16.6141	Homo sapiens	882	>sp|P31930|QCR1_HUMAN Cytochrome b-c1 complex subunit 1, mitochondrial OS=Homo sapiens GN=UQCRC1 PE=1 SV=3	UQCRC1	52645.81	P31930	P31930	7	0
11.0331	11.3131	11.1383	12.2708	11.612	12.7581	12.1518	11.2935	11.5977	11.8463	11.9226	12.1532	12.6274	12.0225	12.5183	12.104	11.9982	11.5889	Homo sapiens	883	>sp|P31937|3HIDH_HUMAN 3-hydroxyisobutyrate dehydrogenase, mitochondrial OS=Homo sapiens GN=HIBADH PE=1 SV=2	HIBADH	35328.86	P31937	P31937	3	0.000342818
16.1504	16.0808	16.1372	16.1775	16.0324	15.8815	15.9642	16.1171	15.9993	15.7885	15.5892	15.6612	15.5105	15.7992	15.7022	15.4788	15.5104	15.4749	Homo sapiens	884	>sp|P31939|PUR9_HUMAN Bifunctional purine biosynthesis protein PURH OS=Homo sapiens GN=ATIC PE=1 SV=3	ATIC	64615.87	P31939	P31939	23	0
13.4072	14.0642	14.5307	13.5397	13.1892	14.3242	13.1827	13.3094	13.5308	13.8045	14.0634	14.0487	14.2548	14.2161	13.2391	13.9652	13.8711	14.7997	Homo sapiens	885	>sp|P31942|HNRH3_HUMAN Heterogeneous nuclear ribonucleoprotein H3 OS=Homo sapiens GN=HNRNPH3 PE=1 SV=2	HNRNPH3	36926.49	P31942	P31942	9	0
16.715	16.9478	16.9371	16.8992	16.6607	16.6665	16.4664	16.5522	16.7891	16.3558	16.356	16.3821	16.3591	16.3736	16.3163	16.3047	16.3205	16.3365	Homo sapiens	886	>sp|P31943|HNRH1_HUMAN Heterogeneous nuclear ribonucleoprotein H OS=Homo sapiens GN=HNRNPH1 PE=1 SV=4	HNRNPH1	49229.46	P31943	P31943	19	0
21.249	21.4201	21.4983	21.2713	21.4923	21.5843	21.4649	21.5413	21.5156	21.5733	21.8804	21.7519	21.7015	21.5845	21.5707	21.7218	21.8377	21.8271	Homo sapiens	887	>sp|P31946|1433B_HUMAN 14-3-3 protein beta/alpha OS=Homo sapiens GN=YWHAB PE=1 SV=3	YWHAB	28082.39	P31946	P31946	28	0
9.92765	11.4723	10.9373	10.7413	10.8762	10.9059	10.7218	10.6811	11.1666	11.9554	11.6079	12.2607	12.42	11.2949	11.8584	11.6293	11.2854	10.9774	Homo sapiens	888	>sp|P31947|1433S_HUMAN 14-3-3 protein sigma OS=Homo sapiens GN=SFN PE=1 SV=1	SFN	27774.06	P31947	P31947	5	0
17.0399	17.2654	17.413	17.0571	17.5118	17.559	17.4688	17.5039	17.4446	17.438	17.7642	17.7183	17.7994	17.591	17.6448	17.9356	18.1105	17.9563	Homo sapiens	889	>sp|P31948|STIP1_HUMAN Stress-induced-phosphoprotein 1 OS=Homo sapiens GN=STIP1 PE=1 SV=1	STIP1	62639.25	P31948	P31948	59	0
17.4973	17.7622	18.0204	17.372	17.8863	18.1576	17.5367	18.0414	17.7401	18.076	18.2512	18.8341	17.6939	17.8166	17.5989	17.9376	18.0915	17.5004	Homo sapiens	890	>sp|P31949|S10AB_HUMAN Protein S100-A11 OS=Homo sapiens GN=S100A11 PE=1 SV=2	S100A11	11740.44	P31949	P31949	7	0
10.7631	10.5953	12.4077	12.1971	11.8955	11.2424	11.7068	11.2476	10.176	11.4996	9.63907	11.183	13.6105	13.515	13.6045	13.0247	12.4218	12.0679	Homo sapiens	891	>sp|P32119|PRDX2_HUMAN Peroxiredoxin-2 OS=Homo sapiens GN=PRDX2 PE=1 SV=5	PRDX2	21891.92	P32119	P32119	2	0
10.7096	10.1907	10.1052	11.2397	10.6106	10.73	11.5098	10.3525	10.1628	10.4787	10.8844	10.848	11.6951	10.997	10.6899	11.0727	10.5784	11.3152	Homo sapiens	892	>sp|P32321|DCTD_HUMAN Deoxycytidylate deaminase OS=Homo sapiens GN=DCTD PE=1 SV=2	DCTD	20016	P32321	P32321	5	0
11.5504	11.0922	10.6188	11.39	9.74681	9.77709	10.3079	10.1495	9.925	10.5012	9.50751	8.99343	10.2654	10.0323	10.1913	10.1972	7.55244	9.84331	Homo sapiens	893	>sp|P32322|P5CR1_HUMAN Pyrroline-5-carboxylate reductase 1, mitochondrial OS=Homo sapiens GN=PYCR1 PE=1 SV=2	PYCR1	33360.62	P32322	P32322	1	0
9.23842	10.2039	8.94147	10.0714	10.8856	10.2494	10.9176	10.8537	9.77663	9.27892	10.3294	10.0424	11.2734	10.8384	10.8921	11.1476	11.2632	11.1309	Homo sapiens	894	>sp|P32418|NAC1_HUMAN Sodium/calcium exchanger 1 OS=Homo sapiens GN=SLC8A1 PE=1 SV=3	SLC8A1	108546.98	P32418	P32418	5	0
14.8372	14.9602	15.0861	14.9892	15.2361	15.1597	15.2706	15.3692	15.2899	15.7732	16.0898	15.8443	15.6635	15.5357	15.6387	15.9224	16.0742	16.0464	Homo sapiens	895	>sp|P32929|CGL_HUMAN Cystathionine gamma-lyase OS=Homo sapiens GN=CTH PE=1 SV=3	CTH	44508	P32929	P32929	7	0
15.8118	15.7985	15.5871	15.7428	15.2538	15.2	15.1967	15.2317	15.5487	14.7362	14.3865	14.529	14.3864	14.728	14.5674	14.2297	14.2093	14.2416	Homo sapiens	896	>sp|P32969|RL9_HUMAN 60S ribosomal protein L9 OS=Homo sapiens GN=RPL9 PE=1 SV=1	RPL9	21863.41	P32969	P32969	11	0
11.0356	10.3736	10.6809	11.6776	11.5035	9.2415	11.474	11.7534	11.285	11.3884	11.285	10.838	13.2748	13.4133	12.8825	11.6338	10.8521	12.2032	Homo sapiens	897	>sp|P33121|ACSL1_HUMAN Long-chain-fatty-acid--CoA ligase 1 OS=Homo sapiens GN=ACSL1 PE=1 SV=1	ACSL1	77943.33	P33121	P33121	2	0
15.6036	15.3705	15.3125	15.6141	15.3147	15.0452	15.1104	15.09	15.1017	14.7232	14.5422	14.5694	14.7311	14.8011	14.7671	14.5993	14.4827	14.6033	Homo sapiens	898	>sp|P33176|KINH_HUMAN Kinesin-1 heavy chain OS=Homo sapiens GN=KIF5B PE=1 SV=1	KIF5B	109684.86	P33176	P33176	51	0
8.55057	9.53006	8.58745	9.4803	8.45582	10.3036	9.38065	10.1601	9.76246	9.62521	7.40553	9.28261	8.58262	8.21935	7.01747	9.02114	8.54249	9.39808	Homo sapiens	899	>sp|P33527|MRP1_HUMAN Multidrug resistance-associated protein 1 OS=Homo sapiens GN=ABCC1 PE=1 SV=3	ABCC1	171591.17	P33527	P33527	1	0.001318392
14.3782	14.2954	14.3306	14.2599	14.4195	14.2003	14.1284	14.3518	14.1492	14.6154	14.6822	14.5453	14.7242	15.016	14.8933	14.7638	14.6906	14.8075	Homo sapiens	900	>sp|P33991|MCM4_HUMAN DNA replication licensing factor MCM4 OS=Homo sapiens GN=MCM4 PE=1 SV=5	MCM4	96557.92	P33991	P33991	16	0
14.7406	14.6706	14.5143	14.6892	14.6473	14.1334	14.2513	14.313	14.6277	13.6743	13.156	13.6132	13.9169	14.0441	13.6157	13.6593	13.548	13.7704	Homo sapiens	901	>sp|P33992|MCM5_HUMAN DNA replication licensing factor MCM5 OS=Homo sapiens GN=MCM5 PE=1 SV=5	MCM5	82285.51	P33992	P33992	31	0
15.4129	15.3735	15.5655	15.4612	15.3569	14.9799	14.937	15.0009	15.102	14.3187	14.051	14.44	14.4854	14.9593	14.4137	14.6169	14.443	14.5834	Homo sapiens	902	>sp|P33993|MCM7_HUMAN DNA replication licensing factor MCM7 OS=Homo sapiens GN=MCM7 PE=1 SV=4	MCM7	81307.94	P33993	P33993	17	0
14.2221	14.2284	14.2678	14.3001	15.1911	14.7592	15.0558	14.8214	15.239	13.1684	13.5373	13.3068	14.8171	14.7173	15.1204	14.9703	15.5423	14.9491	Homo sapiens	903	>sp|P34741|SDC2_HUMAN Syndecan-2 OS=Homo sapiens GN=SDC2 PE=1 SV=2	SDC2	22159.91	P34741	P34741	6	0
14.5492	14.3703	14.4923	14.6293	14.5159	14.3309	14.3573	14.4418	14.3649	14.3221	14.1579	13.9484	14.5705	14.4766	14.6184	14.3052	14.1941	14.4464	Homo sapiens	904	>sp|P34896|GLYC_HUMAN Serine hydroxymethyltransferase, cytosolic OS=Homo sapiens GN=SHMT1 PE=1 SV=1	SHMT1	53082.63	P34896	P34896	11	0
17.0093	16.9131	16.739	16.9505	16.8577	16.4123	16.5949	16.7405	16.8042	16.1839	16.097	15.8956	15.791	16.2339	16.0579	15.899	16.0692	16.1835	Homo sapiens	905	>sp|P34897|GLYM_HUMAN Serine hydroxymethyltransferase, mitochondrial OS=Homo sapiens GN=SHMT2 PE=1 SV=3	SHMT2	55992.97	P34897	P34897	22	0
16.9286	17.0328	16.9648	16.9097	17.0702	16.9825	16.9384	16.9646	17.0351	16.6516	16.5272	16.7625	16.5067	16.7531	16.503	16.6629	16.685	16.6277	Homo sapiens	906	>sp|P34932|HSP74_HUMAN Heat shock 70 kDa protein 4 OS=Homo sapiens GN=HSPA4 PE=1 SV=4	HSPA4	94330.92	P34932	P34932	48	0
11.6972	11.4107	11.6654	12.3079	13.0258	11.8787	12.1006	12.4382	11.2575	10.0845	10.9773	11.7161	12.9019	12.7004	12.6827	11.9414	12.2092	11.0086	Homo sapiens	907	>sp|P34949|MPI_HUMAN Mannose-6-phosphate isomerase OS=Homo sapiens GN=MPI PE=1 SV=2	MPI	46655.89	P34949	P34949	3	0
11.1891	11.4128	10.9485	11.7762	11.9476	10.9336	11.8897	11.6468	11.7425	11.1338	12.3646	12.2501	13.5564	11.46	11.9063	11.6999	11.7269	11.8144	Homo sapiens	908	>sp|P35080|PROF2_HUMAN Profilin-2 OS=Homo sapiens GN=PFN2 PE=1 SV=3	PFN2	15046.23	P35080	P35080	2	0
15.9883	16.2136	16.0421	16.0973	16.1677	16.209	16.1895	16.3231	16.3155	16.5285	16.8791	16.6609	16.7168	16.6735	16.6061	16.3858	16.5154	16.5825	Homo sapiens	909	>sp|P35221|CTNA1_HUMAN Catenin alpha-1 OS=Homo sapiens GN=CTNNA1 PE=1 SV=1	CTNNA1	100071.27	P35221	P35221	28	0
15.9294	16.0605	15.8496	16.2454	16.0434	15.9153	16.1982	16.1419	15.8709	16.3163	16.3788	16.3304	16.2748	16.1196	16.2311	15.9734	15.9025	15.9211	Homo sapiens	910	>sp|P35222|CTNB1_HUMAN Catenin beta-1 OS=Homo sapiens GN=CTNNB1 PE=1 SV=1	CTNNB1	85496.58	P35222	P35222	21	0
15.5522	14.852	15.9527	14.3319	14.2716	14.7257	13.6449	13.5005	14.0615	14.7521	14.1777	13.5359	14.287	14.8136	13.6757	13.3127	12.5711	14.7456	Homo sapiens	911	>sp|P35232|PHB_HUMAN Prohibitin OS=Homo sapiens GN=PHB PE=1 SV=1	PHB	29804.1	P35232	P35232	13	0
10.0837	9.61116	6.97123	10.8515	12.7389	10.3018	12.6334	10.9409	11.5294	11.6226	9.6369	11.5152	11.5507	10.4828	11.7565	14.6297	11.5384	11.4588	Homo sapiens	912	>sp|P35237|SPB6_HUMAN Serpin B6 OS=Homo sapiens GN=SERPINB6 PE=1 SV=3	SERPINB6	42621.89	P35237	P35237	4	0
17.3712	17.5392	17.5111	17.4559	17.5979	17.6582	17.5457	17.6269	17.6211	17.9742	18.3247	18.3164	18.119	18.1236	17.9715	18.0082	18.2155	18.0947	Homo sapiens	913	>sp|P35241|RADI_HUMAN Radixin OS=Homo sapiens GN=RDX PE=1 SV=1	RDX	68563.9	P35241	P35241	35	0
9.35959	9.05023	10.66	8.36879	9.82961	8.73394	7.50482	8.31582	7.06943	10.6663	12.1417	11.1977	10.6765	9.21435	11.1547	10.6339	10.8579	9.74291	Homo sapiens	914	>sp|P35244|RFA3_HUMAN Replication protein A 14 kDa subunit OS=Homo sapiens GN=RPA3 PE=1 SV=1	RPA3	13568.73	P35244	P35244	2	0
13.5831	13.8422	13.6104	13.872	13.5596	13.8353	13.7017	13.3833	13.7259	14.0149	13.9553	13.8317	14.1798	14.4429	14.0358	13.6274	13.6499	14.0675	Homo sapiens	915	>sp|P35249|RFC4_HUMAN Replication factor C subunit 4 OS=Homo sapiens GN=RFC4 PE=1 SV=2	RFC4	39681.76	P35249	P35249	14	0
11.3647	8.23155	10.3222	11.0221	8.91338	7.59306	9.00971	9.71998	9.13063	11.648	10.5352	11.0974	11.6566	11.5659	10.2857	10.7241	8.66375	11.0136	Homo sapiens	916	>sp|P35250|RFC2_HUMAN Replication factor C subunit 2 OS=Homo sapiens GN=RFC2 PE=1 SV=3	RFC2	39157.27	P35250	P35250	6	0
7.10305	8.60138	5.89085	10.4948	6.84443	10.8668	9.0819	7.77943	8.41052	9.73313	9.8318	11.3154	10.8646	10.3511	9.46246	9.96434	7.99478	8.59199	Homo sapiens	917	>sp|P35251|RFC1_HUMAN Replication factor C subunit 1 OS=Homo sapiens GN=RFC1 PE=1 SV=4	RFC1	128254.57	P35251	P35251	5	0
16.1165	16.1773	15.9653	16.1433	15.9864	15.7262	15.8574	15.8538	16.1448	15.5373	15.2451	15.2002	15.1622	15.5716	15.2852	15.0221	15.0054	15.2864	Homo sapiens	918	>sp|P35268|RL22_HUMAN 60S ribosomal protein L22 OS=Homo sapiens GN=RPL22 PE=1 SV=2	RPL22	14786.99	P35268	P35268	2	0
9.5449	8.90055	10.0769	9.87544	10.6274	8.68514	9.74692	9.28889	9.94613	9.39223	8.12497	9.68124	11.7639	8.07165	10.3174	10.817	10.6698	9.42117	Homo sapiens	919	>sp|P35269|T2FA_HUMAN General transcription factor IIF subunit 1 OS=Homo sapiens GN=GTF2F1 PE=1 SV=2	GTF2F1	58240.45	P35269	P35269	5	0
9.0021	8.35953	10.807	16.0953	13.1245	12.919	12.9782	10.7462	8.70865	10.9171	12.1667	11.2336	13.146	10.7449	11.9634	14.318	9.8382	12.3685	Homo sapiens	920	>sp|P35527|K1C9_HUMAN Keratin, type I cytoskeletal 9 OS=Homo sapiens GN=KRT9 PE=1 SV=3	KRT9	62064.32	P35527	P35527	30	0
10.8802	11.2511	10.7576	11.1324	11.0193	11.1618	11.1175	10.6675	10.6508	11.185	11.0414	11.3036	11.4905	11.4458	10.2751	11.2658	10.5167	11.8939	Homo sapiens	921	>sp|P35573|GDE_HUMAN Glycogen debranching enzyme OS=Homo sapiens GN=AGL PE=1 SV=3	AGL	174763.73	P35573	P35573	6	0
19.1532	19.2383	19.0088	19.1142	19.0278	18.7983	18.7032	18.9649	19.1414	16.4637	16.084	15.3707	15.9238	16.4162	16.7536	15.8363	15.7013	16.0884	Homo sapiens	922	>sp|P35579|MYH9_HUMAN Myosin-9 OS=Homo sapiens GN=MYH9 PE=1 SV=4	MYH9	226532.24	P35579	P35579	172	0
18.5649	18.6335	18.3659	18.5713	18.4106	18.0193	18.0626	18.2444	18.5455	16.1096	15.6292	15.5003	15.5981	16.0599	16.395	15.5388	15.392	15.2685	Homo sapiens	923	>sp|P35580|MYH10_HUMAN Myosin-10 OS=Homo sapiens GN=MYH10 PE=1 SV=3	MYH10	228999.11	P35580	P35580	81	0
15.6061	15.446	15.2801	15.5181	15.462	15.2229	15.1527	15.2257	15.4955	14.592	14.251	14.3501	14.3359	14.6771	14.9746	14.3572	14.2079	13.8859	Homo sapiens	924	>sp|P35606|COPB2_HUMAN Coatomer subunit beta' OS=Homo sapiens GN=COPB2 PE=1 SV=2	COPB2	102487.22	P35606	P35606	35	0
7.19239	6.74647	7.47643	8.05065	8.45256	8.8964	8.31727	7.05963	8.10511	9.63262	9.31201	7.04298	10.7427	8.36578	10.2943	8.60424	7.8375	9.91014	Homo sapiens	925	>sp|P35609|ACTN2_HUMAN Alpha-actinin-2 OS=Homo sapiens GN=ACTN2 PE=1 SV=1	ACTN2	103853.78	P35609	P35609	2	0
8.74132	8.93813	8.41139	7.91568	6.84213	8.97066	8.97402	8.22436	7.89451	7.91115	8.27086	7.48648	8.00771	9.04125	8.87257	8.32414	8.94362	8.89032	Homo sapiens	926	>sp|P35610|SOAT1_HUMAN Sterol O-acyltransferase 1 OS=Homo sapiens GN=SOAT1 PE=1 SV=3	SOAT1	64734.6	P35610	P35610	1	0
6.57889	7.08913	7.69311	9.71689	10.0649	7.04313	10.7688	10.0609	8.96623	9.86413	9.93246	10.7309	9.6291	9.74196	10.2867	11.882	11.3272	10.1709	Homo sapiens	927	>sp|P35611|ADDA_HUMAN Alpha-adducin OS=Homo sapiens GN=ADD1 PE=1 SV=2	ADD1	80955.13	P35611	P35611	1	0
13.7495	14.0042	13.1056	14.3378	14.3944	14.0071	14.5854	14.3242	13.9251	13.9252	14.2621	14.5369	15.458	14.8618	15.0292	15.5567	15.7539	15.3428	Homo sapiens	928	>sp|P35613|BASI_HUMAN Basigin OS=Homo sapiens GN=BSG PE=1 SV=2	BSG	42200.36	P35613	P35613	4	0
13.2345	13.3824	13.2891	13.1863	12.4901	13.1674	12.6205	12.232	12.5046	11.4313	11.2389	11.5731	11.6645	10.6388	10.2118	10.7619	10.4517	11.3087	Homo sapiens	929	>sp|P35637|FUS_HUMAN RNA-binding protein FUS OS=Homo sapiens GN=FUS PE=1 SV=1	FUS	53425.83	P35637	P35637	9	0
16.9732	17.4534	17.2961	17.3802	17.1212	17.2144	16.8395	17.1486	17.362	17.0215	17.5385	17.3507	17.6159	17.1389	16.8283	16.9609	16.7032	17.3104	Homo sapiens	930	>sp|P35658|NU214_HUMAN Nuclear pore complex protein Nup214 OS=Homo sapiens GN=NUP214 PE=1 SV=2	NUP214	213619.7	P35658	P35658	10	0
13.7211	13.9212	13.9799	14.1089	13.0079	13.4445	11.9704	13.5212	12.1856	13.4655	13.5943	13.4863	13.443	13.5621	13.6338	12.8107	12.9263	12.7809	Homo sapiens	931	>sp|P35659|DEK_HUMAN Protein DEK OS=Homo sapiens GN=DEK PE=1 SV=1	DEK	42674.28	P35659	P35659	6	0
11.84	12.3973	12.3413	7.17273	10.2414	12.4162	8.15497	8.17105	11.9405	13.6768	13.5243	13.5879	14.3049	14.0173	12.8124	9.77472	14.2448	13.3712	Homo sapiens	932	>sp|P35680|HNF1B_HUMAN Hepatocyte nuclear factor 1-beta OS=Homo sapiens GN=HNF1B PE=1 SV=1	HNF1B	61323.59	P35680	P35680	1	0
8.56935	8.01237	8.08221	6.80423	7.18797	9.69752	9.54347	7.88155	8.52156	7.3008	10.0681	8.5567	10.0205	10.5472	9.38074	8.81318	10.0468	10.4608	Homo sapiens	933	>sp|P35790|CHKA_HUMAN Choline kinase alpha OS=Homo sapiens GN=CHKA PE=1 SV=3	CHKA	52249.04	P35790	P35790	1	0
12.2651	12.4854	12.4474	11.8304	11.9215	13.0038	12.8886	12.5642	11.9331	12.8166	13.3728	13.0402	13.1945	12.5939	13.2172	12.5538	12.5703	12.2936	Homo sapiens	934	>sp|P35813|PPM1A_HUMAN Protein phosphatase 1A OS=Homo sapiens GN=PPM1A PE=1 SV=1	PPM1A	42447.73	P35813	P35813	3	0
15.0541	15.1692	15.4313	14.9558	15.2976	15.4926	15.226	15.3856	15.1916	15.2981	15.6509	15.5381	15.378	15.5779	15.3326	15.2409	15.4753	15.4398	Homo sapiens	936	>sp|P35914|HMGCL_HUMAN Hydroxymethylglutaryl-CoA lyase, mitochondrial OS=Homo sapiens GN=HMGCL PE=1 SV=2	HMGCL	34360.11	P35914	P35914	5	0
15.1865	15.1083	15.0087	15.3065	15.2105	14.7861	15.0128	14.8945	15.2625	14.4654	13.9509	13.7845	14.1376	14.5241	14.336	14.1882	13.8185	14.4219	Homo sapiens	937	>sp|P35998|PRS7_HUMAN 26S protease regulatory subunit 7 OS=Homo sapiens GN=PSMC2 PE=1 SV=3	PSMC2	48633.85	P35998	P35998	22	0
8.28261	9.36624	10.0264	9.78687	9.58746	10.0527	9.58287	9.97447	9.12999	9.76622	10.5145	10.8028	9.78429	9.50602	10.9814	9.84212	9.87604	7.86051	Homo sapiens	938	>sp|P36404|ARL2_HUMAN ADP-ribosylation factor-like protein 2 OS=Homo sapiens GN=ARL2 PE=1 SV=4	ARL2	20877.99	P36404	P36404	4	0
14.7231	15.0467	15.5665	14.7993	14.5624	15.6771	15.0332	15.1558	15.4463	15.7884	16.2729	15.7652	16.138	15.8651	16.1066	16.0334	16.0161	16.1852	Homo sapiens	939	>sp|P36405|ARL3_HUMAN ADP-ribosylation factor-like protein 3 OS=Homo sapiens GN=ARL3 PE=1 SV=2	ARL3	20455.51	P36405	P36405	5	0
15.5854	15.4799	15.571	15.5331	15.543	15.3889	15.4577	15.6526	15.7081	14.9635	14.8083	15.0198	14.9798	15.2349	14.9878	14.9505	15.0164	14.9691	Homo sapiens	940	>sp|P36507|MP2K2_HUMAN Dual specificity mitogen-activated protein kinase kinase 2 OS=Homo sapiens GN=MAP2K2 PE=1 SV=1	MAP2K2	44424.12	P36507	P36507	13	0
16.974	17.0799	16.8645	16.838	16.6028	16.5128	16.2285	16.4949	16.7576	16.073	15.6886	15.3199	15.4952	15.913	15.8147	15.3235	15.1396	15.6818	Homo sapiens	941	>sp|P36542|ATPG_HUMAN ATP synthase subunit gamma, mitochondrial OS=Homo sapiens GN=ATP5C1 PE=1 SV=1	ATP5C1	32996.04	P36542	P36542	12	0
14.4781	14.6784	14.9052	14.7803	14.9004	15.2021	14.844	14.6858	15.11	15.0706	15.2948	15.1305	15.387	15.4443	15.4395	15.2828	15.5692	15.4543	Homo sapiens	942	>sp|P36543|VATE1_HUMAN V-type proton ATPase subunit E 1 OS=Homo sapiens GN=ATP6V1E1 PE=1 SV=1	ATP6V1E1	26145.3	P36543	P36543	7	0
10.9519	11.0553	11.4435	10.851	11.0645	11.362	11.0756	10.9708	11.0176	13.1031	13.3059	12.4666	12.4056	11.9496	12.4318	11.6808	12.0289	12.3386	Homo sapiens	943	>sp|P36551|HEM6_HUMAN Oxygen-dependent coproporphyrinogen-III oxidase, mitochondrial OS=Homo sapiens GN=CPOX PE=1 SV=3	CPOX	50151.95	P36551	P36551	9	0
18.2301	18.1628	18.0066	18.3276	17.9026	17.608	17.7068	17.7331	18.1385	15.3508	14.7696	15.1559	15.1134	15.6869	15.2478	15.1384	14.9651	15.1085	Homo sapiens	944	>sp|P36578|RL4_HUMAN 60S ribosomal protein L4 OS=Homo sapiens GN=RPL4 PE=1 SV=5	RPL4	47697.32	P36578	P36578	24	0
6.76423	9.13231	9.85096	9.38108	5.11475	7.48708	8.21098	6.28147	8.79314	10.2151	9.25397	10.1391	10.5565	7.89965	9.33216	10.7706	9.98798	9.87067	Homo sapiens	945	>sp|P36639|8ODP_HUMAN 7,8-dihydro-8-oxoguanine triphosphatase OS=Homo sapiens GN=NUDT1 PE=1 SV=3	NUDT1	22519.59	P36639	P36639	2	0.000674992
16.1202	16.1867	16.1413	16.2218	16.093	16.0399	15.955	16.0942	16.2734	15.8635	15.8624	15.2917	15.2604	15.7035	15.5818	15.572	15.5211	16.0179	Homo sapiens	946	>sp|P36776|LONM_HUMAN Lon protease homolog, mitochondrial OS=Homo sapiens GN=LONP1 PE=1 SV=2	LONP1	106489.29	P36776	P36776	28	0
16.5628	16.5854	16.5109	16.5256	16.8084	16.5812	16.6472	16.6794	16.9337	15.9392	15.9589	15.8124	15.9045	15.8386	16.0828	15.6079	15.742	15.6004	Homo sapiens	947	>sp|P36871|PGM1_HUMAN Phosphoglucomutase-1 OS=Homo sapiens GN=PGM1 PE=1 SV=3	PGM1	61449.12	P36871	P36871	22	0
12.0711	11.947	12.2594	12.9983	11.9169	12.5066	11.6578	12.096	12.289	11.5555	11.5205	12.4808	12.9002	11.8504	11.5658	11.1677	11.3363	11.1187	Homo sapiens	948	>sp|P36873|PP1G_HUMAN Serine/threonine-protein phosphatase PP1-gamma catalytic subunit OS=Homo sapiens GN=PPP1CC PE=1 SV=1	PPP1CC	36983.78	P36873	P36873	2	0
6.49919	8.65085	7.2156	8.73947	6.87094	7.03336	8.70884	7.34129	8.03816	6.83458	5.87034	9.53923	9.44563	8.97524	7.15227	8.01355	7.78272	6.76952	Homo sapiens	949	>sp|P36897|TGFR1_HUMAN TGF-beta receptor type-1 OS=Homo sapiens GN=TGFBR1 PE=1 SV=1	TGFBR1	55959.74	P36897	P36897	1	0
12.9985	12.9951	12.7007	13.537	13.3707	13.2036	13.0794	13.0424	13.3691	11.689	11.6547	10.0045	11.9372	12.3781	13.3699	11.7678	11.6589	12.1685	Homo sapiens	950	>sp|P36915|GNL1_HUMAN Guanine nucleotide-binding protein-like 1 OS=Homo sapiens GN=GNL1 PE=1 SV=2	GNL1	68660.88	P36915	P36915	3	0
16.0291	16.1159	16.1131	15.9226	16.0163	16.3644	16.3618	16.0784	16.0675	17.1246	17.5764	17.0912	16.7508	16.3223	16.6624	16.5321	16.8828	16.8408	Homo sapiens	951	>sp|P36957|ODO2_HUMAN Dihydrolipoyllysine-residue succinyltransferase component of 2-oxoglutarate dehydrogenase complex, mitochondrial OS=Homo sapiens GN=DLST PE=1 SV=4	DLST	48755.31	P36957	P36957	17	0
13.3798	13.7955	13.1358	13.5751	13.1226	13.6112	13.2125	13.3726	12.8722	15.5827	16.1531	15.7312	15.4895	14.5509	15.2217	13.1205	13.4135	13.2021	Homo sapiens	952	>sp|P36969|GPX4_HUMAN Phospholipid hydroperoxide glutathione peroxidase, mitochondrial OS=Homo sapiens GN=GPX4 PE=1 SV=3	GPX4	22174.68	P36969	P36969	8	0
7.55107	6.70319	9.91944	8.44371	8.59373	6.03841	6.99566	6.99308	7.54518	4.38012	7.61707	6.72901	7.6899	6.19464	6.14618	5.92986	7.11948	6.59034	Homo sapiens	953	>sp|P37059|DHB2_HUMAN Estradiol 17-beta-dehydrogenase 2 OS=Homo sapiens GN=HSD17B2 PE=1 SV=1	HSD17B2	42785.16	P37059	P37059	1	0
16.1824	16.4719	16.4121	16.1421	16.2202	16.1059	15.7358	16.1384	16.0449	16.1965	16.067	16.1088	15.7502	16.2736	15.8531	15.9539	16.1466	16.232	Homo sapiens	954	>sp|P37108|SRP14_HUMAN Signal recognition particle 14 kDa protein OS=Homo sapiens GN=SRP14 PE=1 SV=2	SRP14	14569.93	P37108	P37108	10	0
7.67264	8.31947	8.53941	10.3891	8.42989	9.9104	8.85168	7.89687	7.03786	8.70546	10.2409	10.2813	9.0404	10.9947	7.27962	8.28318	7.03894	9.59088	Homo sapiens	955	>sp|P37235|HPCL1_HUMAN Hippocalcin-like protein 1 OS=Homo sapiens GN=HPCAL1 PE=1 SV=3	HPCAL1	22313.18	P37235	P37235	1	0
19.087	19.1083	19.2642	19.0291	19.3694	19.3237	19.3055	19.482	19.2873	18.8545	19.6679	19.4505	19.0982	19.2039	19.4053	19.6222	20.0324	19.3837	Homo sapiens	956	>sp|P37802|TAGL2_HUMAN Transgelin-2 OS=Homo sapiens GN=TAGLN2 PE=1 SV=3	TAGLN2	22391.44	P37802	P37802	19	0
17.4479	17.655	17.7732	17.4704	17.8388	17.9985	17.8415	17.8913	17.7942	18.1695	18.5809	18.4407	18.2912	18.1087	18.221	18.3742	18.5854	18.3932	Homo sapiens	957	>sp|P37837|TALDO_HUMAN Transaldolase OS=Homo sapiens GN=TALDO1 PE=1 SV=2	TALDO1	37540.12	P37837	P37837	21	0
6.71425	8.19551	7.6114	9.16054	9.51505	7.7821	9.38599	7.40502	9.43797	10.4229	9.85074	9.32812	10.2586	9.66397	11.3367	11.1619	8.79498	9.41174	Homo sapiens	958	>sp|P37840|SYUA_HUMAN Alpha-synuclein OS=Homo sapiens GN=SNCA PE=1 SV=1;>sp|Q16143|SYUB_HUMAN Beta-synuclein OS=Homo sapiens GN=SNCB PE=1 SV=1	SNCA;SNCB	14460.15;14287.88	P37840;Q16143	P37840;Q16143	1	0.001002674
16.2515	16.4028	16.487	16.3472	16.4608	16.3556	16.3819	16.3232	16.4366	16.9352	17.21	16.8834	16.6984	16.6245	16.6597	16.4732	16.6251	16.7401	Homo sapiens	959	>sp|P38117|ETFB_HUMAN Electron transfer flavoprotein subunit beta OS=Homo sapiens GN=ETFB PE=1 SV=3	ETFB	27843.6	P38117	P38117	15	0
14.7982	16.078	16.2016	14.5101	14.45	15.6953	13.6356	14.9273	14.7589	13.1405	13.1065	14.3674	13.4138	13.5656	13.0867	13.2711	13.4036	12.4963	Homo sapiens	960	>sp|P38159|RBMX_HUMAN RNA-binding motif protein, X chromosome OS=Homo sapiens GN=RBMX PE=1 SV=3	RBMX	42331.84	P38159	P38159	19	0
10.5531	10.9983	10.9688	11.7033	10.0157	12.1441	11.98	6.12894	12.338	9.80574	8.36737	11.3327	9.92958	10.5884	8.1657	8.82372	9.47911	8.99856	Homo sapiens	961	>sp|P38570|ITAE_HUMAN Integrin alpha-E OS=Homo sapiens GN=ITGAE PE=1 SV=3	ITGAE	130158.73	P38570	P38570	2	0.008485229
15.4347	15.27	15.3111	15.3747	15.3158	15.509	15.4051	15.5264	15.4308	15.7272	15.5895	15.7274	15.7398	15.7705	15.7138	15.6458	15.6807	15.6355	Homo sapiens	962	>sp|P38606|VATA_HUMAN V-type proton ATPase catalytic subunit A OS=Homo sapiens GN=ATP6V1A PE=1 SV=2	ATP6V1A	68304.08	P38606	P38606	24	0
19.3679	19.4467	19.4654	19.3777	19.4441	19.6039	19.4476	19.5272	19.5169	19.7426	19.9692	19.735	19.3839	19.4259	19.4033	19.4605	19.5249	19.6153	Homo sapiens	963	>sp|P38646|GRP75_HUMAN Stress-70 protein, mitochondrial OS=Homo sapiens GN=HSPA9 PE=1 SV=2	HSPA9	73680.49	P38646	P38646	58	0
13.3946	13.5161	13.8248	13.3775	12.8202	13.529	12.9071	13.0999	13.0686	13.6859	13.8439	13.8211	13.8263	13.7103	13.8721	13.8338	13.7327	13.6232	Homo sapiens	964	>sp|P38919|IF4A3_HUMAN Eukaryotic initiation factor 4A-III OS=Homo sapiens GN=EIF4A3 PE=1 SV=4	EIF4A3	46871.03	P38919	P38919	19	0
19.2704	19.4453	19.2442	19.2531	19.078	19.006	18.7809	19.0207	19.2583	18.3623	18.3296	18.7147	18.1081	18.5189	17.9074	18.1317	18.2408	18.2237	Homo sapiens	965	>sp|P39019|RS19_HUMAN 40S ribosomal protein S19 OS=Homo sapiens GN=RPS19 PE=1 SV=2	RPS19	16060.5	P39019	P39019	23	0
18.6998	18.6981	18.4942	18.5923	18.4633	18.1614	18.2085	18.3774	18.545	16.5373	16.1549	16.2527	16.5208	16.9952	16.5202	16.4298	16.4261	16.7592	Homo sapiens	966	>sp|P39023|RL3_HUMAN 60S ribosomal protein L3 OS=Homo sapiens GN=RPL3 PE=1 SV=2	RPL3	46108.89	P39023	P39023	33	0
13.1568	13.1842	13.1074	12.9423	12.6406	12.9828	12.6122	12.6022	12.8045	12.9981	12.942	12.733	12.7373	13.1099	12.6867	12.7783	12.6823	13.2042	Homo sapiens	967	>sp|P39656|OST48_HUMAN Dolichyl-diphosphooligosaccharide--protein glycosyltransferase 48 kDa subunit OS=Homo sapiens GN=DDOST PE=1 SV=4	DDOST	50800.83	P39656	P39656	9	0
16.4177	16.7269	16.6455	16.5319	16.9811	17.079	16.6627	16.9985	17.0035	17.0163	17.3022	17.1899	17.2758	17.2761	17.1597	17.443	17.4908	17.5524	Homo sapiens	968	>sp|P39687|AN32A_HUMAN Acidic leucine-rich nuclear phosphoprotein 32 family member A OS=Homo sapiens GN=ANP32A PE=1 SV=1	ANP32A	28585.4	P39687	P39687	11	0
13.9189	14.5185	14.1139	14.2551	15.122	14.7671	14.4211	14.8868	14.7577	14.655	15.0279	14.8652	14.5377	15.4362	15.0215	14.4196	14.6118	14.4574	Homo sapiens	969	>sp|P39748|FEN1_HUMAN Flap endonuclease 1 OS=Homo sapiens GN=FEN1 PE=1 SV=1	FEN1	42592.98	P39748	P39748	5	0
8.58236	8.7382	7.30993	9.86218	9.02996	8.45672	10.1153	6.91023	6.3461	8.271	8.86242	10.8127	10.9943	10.0681	8.83899	10.6428	10.1118	9.82351	Homo sapiens	970	>sp|P39880|CUX1_HUMAN Homeobox protein cut-like 1 OS=Homo sapiens GN=CUX1 PE=1 SV=3	CUX1	164187.47	P39880	P39880	1	0
15.0335	14.9027	15.0613	14.8891	15.1468	15.2794	15.3536	15.336	15.007	15.6523	15.791	15.9684	15.6115	15.3478	15.4872	15.775	15.9924	15.6294	Homo sapiens	971	>sp|P40121|CAPG_HUMAN Macrophage-capping protein OS=Homo sapiens GN=CAPG PE=1 SV=2	CAPG	38498.54	P40121	P40121	14	0
13.3428	13.607	13.4982	13.7789	13.8997	13.6117	14.2684	13.5118	13.5763	13.862	13.6834	14.2894	14.3465	14.1992	14.1627	14.9317	14.8082	14.4634	Homo sapiens	972	>sp|P40222|TXLNA_HUMAN Alpha-taxilin OS=Homo sapiens GN=TXLNA PE=1 SV=3	TXLNA	61891.11	P40222	P40222	14	0
16.7838	16.936	16.6831	16.8016	16.7991	16.5667	16.5337	16.8369	16.8447	16.0027	15.8215	15.7908	15.7924	16.2737	16.1411	16.0303	16.0378	16.0473	Homo sapiens	973	>sp|P40227|TCPZ_HUMAN T-complex protein 1 subunit zeta OS=Homo sapiens GN=CCT6A PE=1 SV=3	CCT6A	58024.16	P40227	P40227	19	0
16.2526	16.216	16.2749	16.1476	16.0096	15.9339	15.8613	15.884	16.1146	14.2463	14.0247	13.4858	14.0676	14.5082	14.5941	13.8687	13.9317	14.2437	Homo sapiens	974	>sp|P40429|RL13A_HUMAN 60S ribosomal protein L13a OS=Homo sapiens GN=RPL13A PE=1 SV=2	RPL13A	23577.24	P40429	P40429	13	0
7.35918	5.78236	7.05458	6.58543	6.87689	8.19381	8.40962	5.81817	7.74973	7.89066	6.44003	6.08513	7.30425	7.86781	6.41446	6.77073	7.4526	9.36344	Homo sapiens	975	>sp|P40616|ARL1_HUMAN ADP-ribosylation factor-like protein 1 OS=Homo sapiens GN=ARL1 PE=1 SV=1	ARL1	20417.52	P40616	P40616	2	0
13.1092	13.0511	13.3814	13.8462	13.5962	13.1575	13.6839	13.297	13.6148	11.9415	12.0927	12.3759	13.5455	13.6933	13.2778	12.8895	12.7501	12.8026	Homo sapiens	976	>sp|P40763|STAT3_HUMAN Signal transducer and activator of transcription 3 OS=Homo sapiens GN=STAT3 PE=1 SV=2	STAT3	88067.79	P40763	P40763	9	0
8.36229	7.52062	7.79085	8.55843	8.99226	6.45327	9.28054	5.49187	7.42183	7.83671	6.13853	7.09149	9.32125	7.51743	7.46956	9.66378	6.95795	9.15677	Homo sapiens	977	>sp|P40818|UBP8_HUMAN Ubiquitin carboxyl-terminal hydrolase 8 OS=Homo sapiens GN=USP8 PE=1 SV=1	USP8	127523.22	P40818	P40818	1	0
17.2509	17.4246	17.5407	17.3358	17.6228	17.6163	17.4465	17.5535	17.5916	16.7478	17.0172	17.1289	17.2561	17.3919	17.2563	17.2269	17.47	17.1698	Homo sapiens	978	>sp|P40925|MDHC_HUMAN Malate dehydrogenase, cytoplasmic OS=Homo sapiens GN=MDH1 PE=1 SV=4	MDH1	36426.12	P40925	P40925	15	0
19.5357	19.6749	19.8754	19.4118	19.934	19.9926	19.9871	19.9154	19.8277	20.3253	20.8094	20.3145	20.175	20.0729	20.1447	20.3088	20.602	20.6875	Homo sapiens	979	>sp|P40926|MDHM_HUMAN Malate dehydrogenase, mitochondrial OS=Homo sapiens GN=MDH2 PE=1 SV=3	MDH2	35503.28	P40926	P40926	15	0
13.4573	13.6567	13.6371	13.5158	13.3877	13.356	13.3421	13.3173	13.7783	12.886	12.8806	12.3346	12.9873	13.4541	13.1001	12.9357	12.6879	13.4811	Homo sapiens	980	>sp|P40937|RFC5_HUMAN Replication factor C subunit 5 OS=Homo sapiens GN=RFC5 PE=1 SV=1	RFC5	38496.57	P40937	P40937	12	0
12.0173	12.2431	11.8202	12.2418	11.6615	11.5805	10.8686	11.6299	11.8949	11.6456	10.5848	10.8417	11.3122	11.2531	10.9642	10.7018	10.2169	11.0513	Homo sapiens	981	>sp|P40938|RFC3_HUMAN Replication factor C subunit 3 OS=Homo sapiens GN=RFC3 PE=1 SV=2	RFC3	40556.28	P40938	P40938	7	0
16.3956	16.6957	16.4292	16.5103	16.4391	16.1155	16.1246	16.4038	16.4272	15.5694	15.155	14.9663	14.862	15.4965	15.3594	14.7299	14.6339	14.8977	Homo sapiens	982	>sp|P40939|ECHA_HUMAN Trifunctional enzyme subunit alpha, mitochondrial OS=Homo sapiens GN=HADHA PE=1 SV=2	HADHA	82999.64	P40939	P40939	24	0
15.6334	15.5176	15.4431	15.6707	15.2762	15.3383	15.0491	15.3812	15.4648	14.9973	14.869	14.7052	15.1335	15.1467	15.0731	14.7586	14.8594	15.1038	Homo sapiens	983	>sp|P41091|IF2G_HUMAN Eukaryotic translation initiation factor 2 subunit 3 OS=Homo sapiens GN=EIF2S3 PE=1 SV=3	EIF2S3	51109.49	P41091	P41091	23	0
9.80629	9.8586	10.1733	10.7819	10.9239	10.1468	10.8146	10.6562	10.3444	9.02374	10.4527	10.4208	11.5118	11.5423	11.1738	11.8137	11.8858	11.5204	Homo sapiens	984	>sp|P41208|CETN2_HUMAN Centrin-2 OS=Homo sapiens GN=CETN2 PE=1 SV=1	CETN2	19738.43	P41208	P41208	5	0
12.3751	12.6698	12.3456	12.6104	12.3614	11.6276	12.4345	11.888	12.613	11.7097	11.7791	12.0397	12.3379	12.5496	12.4313	11.9977	12.5669	11.9995	Homo sapiens	985	>sp|P41223|BUD31_HUMAN Protein BUD31 homolog OS=Homo sapiens GN=BUD31 PE=1 SV=2	BUD31	16999.74	P41223	P41223	6	0
15.2355	15.051	14.855	15.1963	15.1785	15.0504	15.3063	14.8167	15.3578	14.5388	15.5888	15.4848	15.551	14.9692	15.3534	16.0187	16.335	15.6625	Homo sapiens	986	>sp|P41227|NAA10_HUMAN N-alpha-acetyltransferase 10 OS=Homo sapiens GN=NAA10 PE=1 SV=1	NAA10	26458.5	P41227	P41227	13	0
12.2885	9.30182	11.2809	13.0493	12.3707	12.157	12.9315	12.2792	13.0397	10.1767	9.66983	11.3166	10.5639	9.84912	12.099	14.2008	15.1084	11.3687	Homo sapiens	987	>sp|P41236|IPP2_HUMAN Protein phosphatase inhibitor 2 OS=Homo sapiens GN=PPP1R2 PE=1 SV=2;>sp|Q6NXS1|IPP2M_HUMAN Protein phosphatase inhibitor 2-like protein 3 OS=Homo sapiens GN=PPP1R2P3 PE=1 SV=1	PPP1R2;PPP1R2P3	23015.19;23048.34	P41236;Q6NXS1	P41236;Q6NXS1	2	0
10.6299	10.9404	10.9466	11.6731	11.4282	11.7754	11.1505	11.2945	10.849	11.1951	11.0617	11.0313	10.0007	10.1489	10.6878	10.0284	10.0779	9.53723	Homo sapiens	988	>sp|P41240|CSK_HUMAN Tyrosine-protein kinase CSK OS=Homo sapiens GN=CSK PE=1 SV=1	CSK	50704.34	P41240	P41240	2	0
17.8967	18.1073	18.0699	18.1357	18.263	18.0582	18.1889	18.2051	18.2277	18.3553	18.7186	18.6592	18.4808	18.4982	18.3766	18.3478	18.5403	18.4347	Homo sapiens	989	>sp|P41250|SYG_HUMAN Glycine--tRNA ligase OS=Homo sapiens GN=GARS PE=1 SV=3	GARS	83165.57	P41250	P41250	35	0
16.6603	16.7303	16.4871	16.7875	16.7097	16.2448	16.311	16.5215	16.6892	15.1599	14.8898	15.0162	15.1407	15.6224	15.3287	15.0142	15.0536	15.0954	Homo sapiens	990	>sp|P41252|SYIC_HUMAN Isoleucine--tRNA ligase, cytoplasmic OS=Homo sapiens GN=IARS PE=1 SV=2	IARS	144498.1	P41252	P41252	42	0
9.31542	9.22751	9.04048	9.55597	9.30189	9.90816	10.0853	9.49097	9.14706	9.15183	10.1794	10.5458	11.5047	11.428	10.724	11.7818	11.6341	11.5701	Homo sapiens	991	>sp|P41567|EIF1_HUMAN Eukaryotic translation initiation factor 1 OS=Homo sapiens GN=EIF1 PE=1 SV=1	EIF1	12732.49	P41567	P41567	6	0
10.8657	10.2041	10.5288	11.6043	9.18979	11.2072	10.6808	9.59637	9.95574	9.76169	10.1087	11.5345	11.4463	11.1612	11.5137	10.64	10.6324	8.82685	Homo sapiens	992	>sp|P41743|KPCI_HUMAN Protein kinase C iota type OS=Homo sapiens GN=PRKCI PE=1 SV=2	PRKCI	68262.36	P41743	P41743	4	0
15.9139	15.9739	15.94	16.1025	16.0665	15.6011	15.4854	15.7478	15.8397	15.1088	14.8392	15.0886	15.0208	15.3999	15.3234	14.9434	15.0145	14.7513	Homo sapiens	993	>sp|P42025|ACTY_HUMAN Beta-centractin OS=Homo sapiens GN=ACTR1B PE=1 SV=1	ACTR1B	42293.41	P42025	P42025	8	0
12.1966	12.0621	12.6051	12.5672	12.4288	12.7674	12.8331	12.3382	12.7812	13.1726	13.7363	13.7343	13.1832	12.8741	12.7293	12.5058	12.809	12.677	Homo sapiens	994	>sp|P42126|ECI1_HUMAN Enoyl-CoA delta isomerase 1, mitochondrial OS=Homo sapiens GN=ECI1 PE=1 SV=1	ECI1	32815.97	P42126	P42126	1	0
10.2362	9.96705	10.1545	10.3767	8.83458	10.2923	8.98447	9.75707	9.35371	9.52146	8.68998	11.0105	9.82952	9.72477	10.3874	10.5266	10.6289	8.06281	Homo sapiens	995	>sp|P42166|LAP2A_HUMAN Lamina-associated polypeptide 2, isoform alpha OS=Homo sapiens GN=TMPO PE=1 SV=2	TMPO	75492.05	P42166	P42166	6	0
18.2263	18.1282	17.9181	18.2378	18.112	17.8419	17.7544	18.0015	18.1563	17.2501	16.9146	17.1585	17.173	17.5857	17.4811	16.4056	16.3135	16.1816	Homo sapiens	996	>sp|P42224|STAT1_HUMAN Signal transducer and activator of transcription 1-alpha/beta OS=Homo sapiens GN=STAT1 PE=1 SV=2	STAT1	87334.76	P42224	P42224	46	0
10.9642	10.6359	10.3859	11.7224	11.2158	10.7126	11.9143	11.1289	11.1702	10.3501	9.90253	11.0335	10.7209	10.7869	10.1953	10.2312	9.57257	9.55329	Homo sapiens	997	>sp|P42226|STAT6_HUMAN Signal transducer and activator of transcription 6 OS=Homo sapiens GN=STAT6 PE=1 SV=1	STAT6	94135.07	P42226	P42226	2	0
12.658	12.396	12.6049	12.5949	12.2905	11.9699	12.1495	11.9773	12.3425	11.7136	11.5966	11.4624	11.767	12.1465	12.0839	11.4026	11.3562	11.4449	Homo sapiens	998	>sp|P42285|SK2L2_HUMAN Superkiller viralicidic activity 2-like 2 OS=Homo sapiens GN=SKIV2L2 PE=1 SV=3	SKIV2L2	117804.73	P42285	P42285	20	0
14.3522	14.3334	14.4758	14.2662	14.5413	14.2714	14.5431	14.3739	14.2612	12.9416	13.2506	14.062	14.4308	14.3167	14.0622	14.6873	14.8809	14.1297	Homo sapiens	999	>sp|P42330|AK1C3_HUMAN Aldo-keto reductase family 1 member C3 OS=Homo sapiens GN=AKR1C3 PE=1 SV=4	AKR1C3	36853.23	P42330	P42330	11	0
10.7243	10.3126	10.534	11.5211	10.6612	9.89056	11.2282	10.9649	10.0547	8.98258	8.70712	8.8798	8.91361	9.61253	7.58324	8.79488	8.73691	10.4108	Homo sapiens	1000	>sp|P42345|MTOR_HUMAN Serine/threonine-protein kinase mTOR OS=Homo sapiens GN=MTOR PE=1 SV=1	MTOR	288891.61	P42345	P42345	5	0
11.5312	11.4082	11.4067	12.6537	12.1346	11.6288	11.942	12.0311	11.1919	10.9273	10.3701	7.53317	11.1362	12.0312	10.2025	10.3371	10.8876	15.109	Homo sapiens	1001	>sp|P42356|PI4KA_HUMAN Phosphatidylinositol 4-kinase alpha OS=Homo sapiens GN=PI4KA PE=1 SV=4	PI4KA	236830.45	P42356	P42356	6	0
13.0888	12.8138	13.1212	13.0566	13.3336	13.3769	13.1181	13.2857	13.4332	12.9336	13.0341	13.2968	13.167	13.5902	12.8501	13.17	13.4112	13.5061	Homo sapiens	1002	>sp|P42574|CASP3_HUMAN Caspase-3 OS=Homo sapiens GN=CASP3 PE=1 SV=2	CASP3	31607.88	P42574	P42574	3	0
7.28566	8.09066	9.89653	6.54821	4.68854	6.84829	6.10588	6.21866	8.3882	8.65847	7.03731	7.81764	7.89378	8.15288	7.21169	9.1137	8.54439	9.67093	Homo sapiens	1003	>sp|P42575|CASP2_HUMAN Caspase-2 OS=Homo sapiens GN=CASP2 PE=1 SV=2	CASP2	50685.27	P42575	P42575	1	0
14.4598	14.3694	14.575	14.5009	13.9964	14.3686	14.2032	14.3409	14.2299	13.6321	13.1214	13.6848	13.5151	13.9685	13.7875	13.543	13.1436	12.9895	Homo sapiens	1004	>sp|P42677|RS27_HUMAN 40S ribosomal protein S27 OS=Homo sapiens GN=RPS27 PE=1 SV=3	RPS27	9461.12	P42677	P42677	3	0
17.401	17.563	17.4615	17.3308	17.331	17.3752	17.2565	17.4353	17.3202	17.2679	17.2589	17.1167	16.8545	17.13	16.9595	16.9753	17.0575	17.1959	Homo sapiens	1005	>sp|P42704|LPPRC_HUMAN Leucine-rich PPR motif-containing protein, mitochondrial OS=Homo sapiens GN=LRPPRC PE=1 SV=3	LRPPRC	157905.07	P42704	P42704	31	0
14.5403	14.8081	14.3766	14.6235	14.6655	13.9568	14.3677	14.4591	14.2853	14.0318	13.8699	12.7007	13.4891	13.5714	14.0856	13.2677	12.8969	13.7771	Homo sapiens	1006	>sp|P42765|THIM_HUMAN 3-ketoacyl-CoA thiolase, mitochondrial OS=Homo sapiens GN=ACAA2 PE=1 SV=2	ACAA2	41924.15	P42765	P42765	14	0
16.4879	16.4666	16.4019	16.4004	16.2555	16.0621	16.0969	16.1522	16.2727	13.9692	13.9828	14.1984	14.4763	14.8267	14.1876	14.3493	14.3325	14.5824	Homo sapiens	1007	>sp|P42766|RL35_HUMAN 60S ribosomal protein L35 OS=Homo sapiens GN=RPL35 PE=1 SV=2	RPL35	14551.47	P42766	P42766	11	0
10.1815	8.51435	9.14323	8.35578	8.24202	7.71017	11.0741	8.51801	7.32709	8.41894	7.46907	8.8793	8.09938	7.53599	8.3598	7.90409	6.92234	9.02467	Homo sapiens	1008	>sp|P42858|HD_HUMAN Huntingtin OS=Homo sapiens GN=HTT PE=1 SV=2	HTT	347603.29	P42858	P42858	1	0
9.74776	11.3364	10.9343	11.2124	12.1842	12.2054	12.8253	12.1027	11.9746	10.8656	10.9632	12.0815	12.1304	12.6382	10.8964	12.6555	12.5491	12.923	Homo sapiens	1009	>sp|P43007|SATT_HUMAN Neutral amino acid transporter A OS=Homo sapiens GN=SLC1A4 PE=1 SV=1	SLC1A4	55723.07	P43007	P43007	2	0.000342818
13.2391	13.1642	13.0614	13.0487	13.1473	12.418	12.9093	12.8914	13.0015	12.5028	11.6478	11.1346	12.2494	12.7284	12.4019	12.217	11.7381	13.0052	Homo sapiens	1010	>sp|P43034|LIS1_HUMAN Platelet-activating factor acetylhydrolase IB subunit alpha OS=Homo sapiens GN=PAFAH1B1 PE=1 SV=2	PAFAH1B1	46637.96	P43034	P43034	16	0
8.43613	7.27492	7.56423	6.99363	8.62218	7.19157	9.08243	9.21857	8.82555	7.81754	8.38441	7.31069	8.51409	8.93661	10.0052	8.81991	8.37683	8.10883	Homo sapiens	1011	>sp|P43121|MUC18_HUMAN Cell surface glycoprotein MUC18 OS=Homo sapiens GN=MCAM PE=1 SV=2	MCAM	71607.4	P43121	P43121	1	0.009422111
16.3358	16.5989	16.5574	16.4424	15.4688	16.3412	15.5419	15.8017	16.0695	14.6923	14.4579	16.0246	14.8824	15.2313	14.5683	15.2246	15.1428	14.2228	Homo sapiens	1012	>sp|P43243|MATR3_HUMAN Matrin-3 OS=Homo sapiens GN=MATR3 PE=1 SV=2	MATR3	94623.23	P43243	P43243	27	0
12.7022	13.0391	12.8745	12.7624	12.8889	12.7986	12.695	12.8656	12.5824	12.8328	12.7638	12.5873	13.1707	13.5855	13.2429	12.8541	13.0088	13.2776	Homo sapiens	1013	>sp|P43246|MSH2_HUMAN DNA mismatch repair protein Msh2 OS=Homo sapiens GN=MSH2 PE=1 SV=1	MSH2	104743.07	P43246	P43246	14	0
11.182	10.7505	12.3181	11.4364	11.6572	11.9149	12.1189	11.6157	11.5918	12.6758	13.1102	12.2899	11.9019	12.0111	12.3644	11.9719	11.8778	12.1201	Homo sapiens	1014	>sp|P43304|GPDM_HUMAN Glycerol-3-phosphate dehydrogenase, mitochondrial OS=Homo sapiens GN=GPD2 PE=1 SV=3	GPD2	80852.71	P43304	P43304	4	0
7.71635	8.21098	7.34878	7.22901	8.00878	8.05134	9.84686	7.9047	7.02967	6.02411	8.09093	7.43535	9.07204	7.26487	9.573	10.22	8.33407	7.49467	Homo sapiens	1015	>sp|P43307|SSRA_HUMAN Translocon-associated protein subunit alpha OS=Homo sapiens GN=SSR1 PE=1 SV=3	SSR1	32235.35	P43307	P43307	1	0
17.1762	17.1221	17.43	17.212	17.3306	17.529	17.3707	17.3964	17.6636	18.0529	18.2922	18.0863	18.3317	18.1105	18.4963	18.1506	18.4151	18.0939	Homo sapiens	1016	>sp|P43487|RANG_HUMAN Ran-specific GTPase-activating protein OS=Homo sapiens GN=RANBP1 PE=1 SV=1	RANBP1	23310.12	P43487	P43487	11	0
13.0154	12.7977	12.497	13.6136	13.5455	12.5398	13.2396	12.4675	13.1036	12.102	11.6321	10.0812	11.6838	12.2146	12.0223	11.7512	11.0958	13.1362	Homo sapiens	1017	>sp|P43490|NAMPT_HUMAN Nicotinamide phosphoribosyltransferase OS=Homo sapiens GN=NAMPT PE=1 SV=1	NAMPT	55521.16	P43490	P43490	6	0
15.9885	15.9876	15.9409	16.0116	15.9363	15.8048	15.767	15.8305	16.0972	15.6683	15.3905	15.3009	15.4514	15.8736	15.6888	15.4088	15.3359	15.5745	Homo sapiens	1018	>sp|P43686|PRS6B_HUMAN 26S protease regulatory subunit 6B OS=Homo sapiens GN=PSMC4 PE=1 SV=2	PSMC4	47366.25	P43686	P43686	18	0
12.4572	12.8282	13.8138	11.1452	7.79548	12.93	7.40053	11.7083	10.1891	11.5713	11.3569	9.72899	9.94688	11.16	9.20856	5.78609	7.46328	9.70466	Homo sapiens	1019	>sp|P45880|VDAC2_HUMAN Voltage-dependent anion-selective channel protein 2 OS=Homo sapiens GN=VDAC2 PE=1 SV=2	VDAC2	31566.5	P45880	P45880	2	0
14.5932	14.0016	15.3081	15.1215	14.8119	15.6174	14.5156	14.9232	14.3684	16.2275	16.6517	16.9482	16.7502	16.2371	16.4532	16.2355	16.4261	15.8626	Homo sapiens	1020	>sp|P45973|CBX5_HUMAN Chromobox protein homolog 5 OS=Homo sapiens GN=CBX5 PE=1 SV=1	CBX5	22224.97	P45973	P45973	8	0
14.7408	14.6397	14.8193	14.6066	15.0428	14.8243	15.2551	14.7522	14.9744	15.5288	15.741	15.6081	15.6504	15.6684	15.5745	15.6549	15.5993	15.7389	Homo sapiens	1021	>sp|P45974|UBP5_HUMAN Ubiquitin carboxyl-terminal hydrolase 5 OS=Homo sapiens GN=USP5 PE=1 SV=2	USP5	95786.27	P45974	P45974	21	0
11.4641	12.1246	12.1336	12.1561	12.2764	11.5582	12.1552	11.7023	11.047	10.2033	11.945	10.9495	12.0399	12.1573	12.2542	11.6176	12.3802	11.968	Homo sapiens	1022	>sp|P45984|MK09_HUMAN Mitogen-activated protein kinase 9 OS=Homo sapiens GN=MAPK9 PE=1 SV=2	MAPK9	48139.06	P45984	P45984	4	0
9.96574	9.90433	6.25502	10.0919	10.118	10.212	9.84111	9.40263	9.11733	6.82556	7.59202	7.42637	8.58568	8.63149	8.59814	7.56075	7.83884	7.49265	Homo sapiens	1023	>sp|P45985|MP2K4_HUMAN Dual specificity mitogen-activated protein kinase kinase 4 OS=Homo sapiens GN=MAP2K4 PE=1 SV=1	MAP2K4	44287.73	P45985	P45985	2	0.000342818
11.8091	11.8296	11.2168	11.4087	10.6867	11.6385	10.2836	11.3299	10.6204	11.2384	11.0511	12.683	12.1011	12.617	11.7209	10.6417	9.89316	9.36725	Homo sapiens	1024	>sp|P46013|KI67_HUMAN Antigen KI-67 OS=Homo sapiens GN=MKI67 PE=1 SV=2	MKI67	358693.66	P46013	P46013	15	0
15.4609	15.4362	15.3839	15.6413	15.413	15.3784	15.3061	15.6297	15.5622	15.0865	15.0306	15.5277	15.1445	15.3677	15.2708	15.1044	14.9612	14.5489	Homo sapiens	1025	>sp|P46060|RAGP1_HUMAN Ran GTPase-activating protein 1 OS=Homo sapiens GN=RANGAP1 PE=1 SV=1	RANGAP1	63541.95	P46060	P46060	12	0
9.47262	8.74588	8.0582	9.57642	9.19907	8.26439	8.50972	5.56262	8.73135	9.70274	8.9749	10.1998	10.0283	10.5625	9.24589	8.42495	9.84499	9.32356	Homo sapiens	1026	>sp|P46063|RECQ1_HUMAN ATP-dependent DNA helicase Q1 OS=Homo sapiens GN=RECQL PE=1 SV=3	RECQL	73457.34	P46063	P46063	4	0
11.6735	11.5813	11.597	11.3544	10.8466	10.4961	10.6249	11.1703	10.9536	11.6189	10.8024	9.40377	11.2529	11.6571	14.3938	10.0099	9.55888	8.65245	Homo sapiens	1027	>sp|P46087|NOP2_HUMAN Probable 28S rRNA (cytosine(4447)-C(5))-methyltransferase OS=Homo sapiens GN=NOP2 PE=1 SV=2	NOP2	89301.81	P46087	P46087	8	0
13.0194	12.7411	13.1668	13.228	13.5297	13.4046	13.488	13.4874	13.4641	13.6006	14.0854	14.341	14.1025	13.5909	13.9774	14.4548	14.8622	14.0297	Homo sapiens	1028	>sp|P46108|CRK_HUMAN Adapter molecule crk OS=Homo sapiens GN=CRK PE=1 SV=2	CRK	33830.69	P46108	P46108	10	0
10.5231	10.4279	10.98	10.3111	11.0627	10.9557	11.0898	11.0144	10.7215	11.9438	12.3326	12.2974	12.4996	11.6934	11.9132	12.4091	12.3412	12.3993	Homo sapiens	1029	>sp|P46109|CRKL_HUMAN Crk-like protein OS=Homo sapiens GN=CRKL PE=1 SV=1	CRKL	33776.98	P46109	P46109	7	0
14.6742	14.9525	14.8837	14.7628	15.0981	14.9356	14.9298	14.9973	15.2111	14.2883	14.7095	14.7212	15.018	14.7347	14.9196	15.5421	15.6617	15.3365	Homo sapiens	1030	>sp|P46379|BAG6_HUMAN Large proline-rich protein BAG6 OS=Homo sapiens GN=BAG6 PE=1 SV=2	BAG6	119408.69	P46379	P46379	15	0
15.8871	16.0254	15.9325	15.985	15.8119	15.8021	15.7042	15.6968	15.8026	15.9034	15.8003	15.7512	15.9872	16.251	16.2062	15.5626	15.4632	15.5264	Homo sapiens	1031	>sp|P46459|NSF_HUMAN Vesicle-fusing ATPase OS=Homo sapiens GN=NSF PE=1 SV=3	NSF	82594.34	P46459	P46459	34	0
8.75649	6.67267	9.79365	9.16239	10.6057	8.15644	11.1806	10.6856	11.0023	8.00405	8.95598	10.3395	11.7301	11.3322	10.6226	11.0863	11.239	10.2118	Homo sapiens	1032	>sp|P46531|NOTC1_HUMAN Neurogenic locus notch homolog protein 1 OS=Homo sapiens GN=NOTCH1 PE=1 SV=4;>sp|Q04721|NOTC2_HUMAN Neurogenic locus notch homolog protein 2 OS=Homo sapiens GN=NOTCH2 PE=1 SV=3	NOTCH1;NOTCH2	272504.67;265404.78	P46531;Q04721	P46531;Q04721	1	0
14.5658	14.4098	14.1902	14.3476	13.9697	13.9056	13.9791	14.1015	14.2101	13.1101	12.9209	13.4562	13.4129	13.6726	13.3483	13.1292	12.7374	12.6871	Homo sapiens	1033	>sp|P46734|MP2K3_HUMAN Dual specificity mitogen-activated protein kinase kinase 3 OS=Homo sapiens GN=MAP2K3 PE=1 SV=2	MAP2K3	39318.38	P46734	P46734	10	0
14.6515	14.3846	14.3281	15.874	15.0314	15.1698	14.1162	14.2823	14.8163	11.6823	11.084	11.3545	12.4566	13.0017	14.5045	12.3047	12.1302	10.4708	Homo sapiens	1034	>sp|P46776|RL27A_HUMAN 60S ribosomal protein L27a OS=Homo sapiens GN=RPL27A PE=1 SV=2	RPL27A	16561.38	P46776	P46776	3	0
17.7752	17.9669	17.8485	17.8165	17.7764	17.6647	17.55	17.7958	17.7806	16.7447	16.5864	16.7857	16.4195	16.8031	16.6921	16.3735	16.4313	16.2014	Homo sapiens	1035	>sp|P46777|RL5_HUMAN 60S ribosomal protein L5 OS=Homo sapiens GN=RPL5 PE=1 SV=3	RPL5	34362.62	P46777	P46777	20	0
16.5763	16.7258	16.5579	16.799	16.553	16.4207	16.4394	16.4637	16.8702	14.833	14.5144	14.8909	14.9784	15.4529	15.2076	14.8929	14.8647	14.6696	Homo sapiens	1036	>sp|P46778|RL21_HUMAN 60S ribosomal protein L21 OS=Homo sapiens GN=RPL21 PE=1 SV=2	RPL21	18564.83	P46778	P46778	14	0
18.7811	18.8519	18.715	18.7901	18.6532	18.46	18.5432	18.551	18.7997	17.1455	16.8053	16.917	16.9798	17.5294	17.0911	16.9503	16.935	17.1645	Homo sapiens	1037	>sp|P46779|RL28_HUMAN 60S ribosomal protein L28 OS=Homo sapiens GN=RPL28 PE=1 SV=3	RPL28	15747.5	P46779	P46779	11	0
17.5584	17.6316	17.49	17.5731	17.3282	17.1631	17.1808	17.2812	17.4967	15.692	15.4419	15.4247	15.3064	15.8318	15.4747	15.379	15.338	15.5952	Homo sapiens	1038	>sp|P46781|RS9_HUMAN 40S ribosomal protein S9 OS=Homo sapiens GN=RPS9 PE=1 SV=3	RPS9	22591.43	P46781	P46781	15	0
18.6944	18.8474	18.7518	18.7066	18.5236	18.4743	18.2981	18.5619	18.6323	17.7832	17.7671	17.9802	17.7859	18.1951	17.8071	17.6752	17.7227	17.6773	Homo sapiens	1039	>sp|P46782|RS5_HUMAN 40S ribosomal protein S5 OS=Homo sapiens GN=RPS5 PE=1 SV=4	RPS5	22876.39	P46782	P46782	13	0
17.8147	18.0017	17.3498	17.8628	18.1413	17.1981	17.5852	17.5789	17.835	16.3528	16.2519	16.8208	16.7741	16.9365	16.7728	17.2546	17.2357	16.8092	Homo sapiens	1040	>sp|P46783|RS10_HUMAN 40S ribosomal protein S10 OS=Homo sapiens GN=RPS10 PE=1 SV=1	RPS10	18897.77	P46783	P46783	19	0
17.1246	17.2389	17.2406	17.2147	17.1972	17.5041	16.8466	17.1789	17.0168	16.6266	16.6857	17.2013	16.947	17.0274	16.7495	16.7047	16.8877	16.4887	Homo sapiens	1041	>sp|P46821|MAP1B_HUMAN Microtubule-associated protein 1B OS=Homo sapiens GN=MAP1B PE=1 SV=2	MAP1B	270634.42	P46821	P46821	37	0
13.238	13.4259	13.403	13.1075	13.698	13.3609	13.7906	13.5097	13.6535	14.2675	14.7974	14.9554	14.7896	14.162	14.4359	14.7906	14.3505	14.1876	Homo sapiens	1042	>sp|P46926|GNPI1_HUMAN Glucosamine-6-phosphate isomerase 1 OS=Homo sapiens GN=GNPDA1 PE=1 SV=1	GNPDA1	32668.51	P46926	P46926	10	0
13.4963	13.0148	13.3191	13.7325	13.307	12.8136	13.2247	13.2811	12.9842	12.098	12.4574	11.9868	12.9031	12.5943	13.1803	12.3664	12.2055	12.1453	Homo sapiens	1043	>sp|P46934|NEDD4_HUMAN E3 ubiquitin-protein ligase NEDD4 OS=Homo sapiens GN=NEDD4 PE=1 SV=4	NEDD4	149114.47	P46934	P46934	10	0.000342818
13.2297	13.2001	7.6081	13.4769	14.0452	12.8328	13.9172	13.5111	13.8903	9.77326	10.5355	11.4341	10.9026	10.5412	11.8334	14.3684	14.6807	12.1332	Homo sapiens	1044	>sp|P46937|YAP1_HUMAN Transcriptional coactivator YAP1 OS=Homo sapiens GN=YAP1 PE=1 SV=2	YAP1	54461.52	P46937	P46937	1	0.000342818
13.3831	13.5615	13.2994	13.6051	13.6158	13.6196	13.4812	13.5518	13.5535	12.6777	13.2036	12.655	12.8631	13.1143	13.3001	13.0172	12.4775	12.7216	Homo sapiens	1045	>sp|P46939|UTRO_HUMAN Utrophin OS=Homo sapiens GN=UTRN PE=1 SV=2	UTRN	394466.19	P46939	P46939	13	0
16.3487	16.4766	16.283	16.5326	16.3946	16.1925	16.1902	16.2189	16.5844	15.7946	15.6197	15.5906	15.5756	15.7216	15.7892	15.2953	15.283	15.2651	Homo sapiens	1046	>sp|P46940|IQGA1_HUMAN Ras GTPase-activating-like protein IQGAP1 OS=Homo sapiens GN=IQGAP1 PE=1 SV=1	IQGAP1	189251.98	P46940	P46940	69	0
14.3936	14.2077	14.4008	14.2699	13.6489	14.0046	13.6077	13.3827	13.8191	14.1641	14.1505	13.8964	13.9418	14.2534	13.9288	13.6801	13.7378	14.1387	Homo sapiens	1047	>sp|P46977|STT3A_HUMAN Dolichyl-diphosphooligosaccharide--protein glycosyltransferase subunit STT3A OS=Homo sapiens GN=STT3A PE=1 SV=2	STT3A	80529.59	P46977	P46977	17	0
13.735	14.0473	13.937	13.6694	13.8625	13.0417	13.5533	13.7354	13.5311	13.4657	12.8138	13.0333	13.3506	13.3912	13.0328	13.194	12.4736	13.2782	Homo sapiens	1048	>sp|P47755|CAZA2_HUMAN F-actin-capping protein subunit alpha-2 OS=Homo sapiens GN=CAPZA2 PE=1 SV=3	CAPZA2	32949.1	P47755	P47755	6	0
16.4668	16.6215	16.6657	16.5435	16.6529	16.8749	16.8446	16.8161	16.7319	17.0715	17.1077	17.0541	16.9752	16.791	16.9811	16.9573	17.1313	16.9818	Homo sapiens	1049	>sp|P47756|CAPZB_HUMAN F-actin-capping protein subunit beta OS=Homo sapiens GN=CAPZB PE=1 SV=4	CAPZB	31350.48	P47756	P47756	14	0
15.8475	15.8588	15.67	15.7936	15.6848	15.2589	15.4927	15.5763	15.5537	14.8156	14.7458	14.6601	14.7838	15.2842	14.9264	14.6006	14.5517	14.8044	Homo sapiens	1050	>sp|P47897|SYQ_HUMAN Glutamine--tRNA ligase OS=Homo sapiens GN=QARS PE=1 SV=1	QARS	87798.7	P47897	P47897	26	0
15.8121	15.9797	15.7735	16.1408	16.6741	16.2958	15.9443	16.0972	16.5364	12.4634	13.4595	13.427	14.1467	14.85	14.3519	13.9529	14.3965	13.8556	Homo sapiens	1051	>sp|P47914|RL29_HUMAN 60S ribosomal protein L29 OS=Homo sapiens GN=RPL29 PE=1 SV=2	RPL29	17752.07	P47914	P47914	2	0
12.1943	11.9872	12.0216	11.8664	11.2962	11.8029	10.5328	11.5012	11.2024	11.2137	10.2885	11.4673	9.74015	9.51788	10.2505	10.8188	7.9685	8.05589	Homo sapiens	1052	>sp|P47974|TISD_HUMAN Zinc finger protein 36, C3H1 type-like 2 OS=Homo sapiens GN=ZFP36L2 PE=1 SV=3	ZFP36L2	51062.78	P47974	P47974	1	0
20.1552	20.152	20.1152	19.9855	19.8624	19.719	19.5437	19.9255	19.7817	19.8617	19.6868	19.7632	19.4718	19.959	19.5924	19.565	19.4514	19.6422	Homo sapiens	1053	>sp|P48047|ATPO_HUMAN ATP synthase subunit O, mitochondrial OS=Homo sapiens GN=ATP5O PE=1 SV=1	ATP5O	23277.31	P48047	P48047	7	0
16.0536	16.2945	16.2888	15.2079	16.31	15.8046	16.0645	16.2112	16.3533	12.9259	14.127	15.2418	13.6573	14.4971	15.6511	13.9688	13.5623	10.4764	Homo sapiens	1054	>sp|P48059|LIMS1_HUMAN LIM and senescent cell antigen-like-containing domain protein 1 OS=Homo sapiens GN=LIMS1 PE=1 SV=4	LIMS1	37251.31	P48059	P48059	4	0
13.3431	13.2497	13.1742	13.3356	13.1418	13.1039	13.4035	13.0772	13.154	13.1455	13.4248	13.3676	13.5613	13.3344	13.1917	13.1158	13.1038	13.2836	Homo sapiens	1055	>sp|P48147|PPCE_HUMAN Prolyl endopeptidase OS=Homo sapiens GN=PREP PE=1 SV=2	PREP	80699.53	P48147	P48147	16	0
13.8554	13.8689	13.6907	14.0075	14.2675	14.2845	14.5696	14.0396	14.0665	13.7519	13.657	14.1748	14.1499	13.8216	13.6449	13.7896	14.0153	13.773	Homo sapiens	1056	>sp|P48163|MAOX_HUMAN NADP-dependent malic enzyme OS=Homo sapiens GN=ME1 PE=1 SV=1	ME1	64149.63	P48163	P48163	9	0
15.0356	14.8962	14.8815	15.0161	15.025	14.7041	14.9342	14.7452	15.1104	14.345	14.5123	14.3808	14.3821	14.5375	14.5964	14.402	14.4659	14.3453	Homo sapiens	1057	>sp|P48444|COPD_HUMAN Coatomer subunit delta OS=Homo sapiens GN=ARCN1 PE=1 SV=1	ARCN1	57210.37	P48444	P48444	26	0
12.4741	12.2547	11.7789	13.5487	13.5601	12.6261	13.2325	12.6479	13.4434	11.6833	10.6232	11.6129	13.2828	13.5536	13.0018	13.4713	13.0134	13.1991	Homo sapiens	1058	>sp|P48449|ERG7_HUMAN Lanosterol synthase OS=Homo sapiens GN=LSS PE=1 SV=1	LSS	83308.74	P48449	P48449	13	0
13.2344	12.6158	12.9285	12.437	13.6368	12.0757	13.0612	13.4474	12.638	11.7281	12.5176	12.7579	13.2169	13.5801	13.181	13.7444	13.7219	13.3156	Homo sapiens	1059	>sp|P48507|GSH0_HUMAN Glutamate--cysteine ligase regulatory subunit OS=Homo sapiens GN=GCLM PE=1 SV=1	GCLM	30727.05	P48507	P48507	1	0.001318392
14.6723	14.166	14.1474	15.4453	16.3458	16.2544	16.3184	15.7549	15.583	16.4784	16.6971	16.522	17.485	17.0552	17.4117	17.1978	17.5595	17.3027	Homo sapiens	1060	>sp|P48509|CD151_HUMAN CD151 antigen OS=Homo sapiens GN=CD151 PE=1 SV=3	CD151	28295.1	P48509	P48509	2	0
16.5299	16.7039	16.7555	16.4816	16.6847	16.8366	16.7792	16.9716	16.7503	17.0115	17.326	16.9981	17.1185	17.2816	17.1787	17.0788	17.2865	17.3746	Homo sapiens	1061	>sp|P48556|PSMD8_HUMAN 26S proteasome non-ATPase regulatory subunit 8 OS=Homo sapiens GN=PSMD8 PE=1 SV=2	PSMD8	39611.89	P48556	P48556	11	0
14.2143	14.6454	12.4502	14.4737	14.8584	14.5012	14.3545	14.6885	14.7102	8.82266	14.0552	14.236	15.1385	14.4113	13.6726	14.852	15.3244	13.3935	Homo sapiens	1062	>sp|P48634|PRC2A_HUMAN Protein PRRC2A OS=Homo sapiens GN=PRRC2A PE=1 SV=3	PRRC2A	228863.18	P48634	P48634	6	0
14.6014	15.0413	15.4716	14.9935	15.5193	15.569	15.4596	15.6207	15.2203	15.5578	15.9333	15.8821	16.1699	16.1511	16.0664	15.9328	16.5097	16.1788	Homo sapiens	1063	>sp|P48637|GSHB_HUMAN Glutathione synthetase OS=Homo sapiens GN=GSS PE=1 SV=1	GSS	52384.82	P48637	P48637	13	0
17.1407	17.2978	17.2443	17.2659	17.3042	17.2859	17.1226	17.366	17.2387	17.2027	17.2967	17.2338	17.2124	17.3527	17.3572	17.2398	17.3694	17.2457	Homo sapiens	1064	>sp|P48643|TCPE_HUMAN T-complex protein 1 subunit epsilon OS=Homo sapiens GN=CCT5 PE=1 SV=1	CCT5	59671.01	P48643	P48643	34	0
10.1555	10.4895	10.7897	11.0535	10.8475	10.384	10.8454	10.3186	10.7965	9.29869	9.43025	8.50755	10.1501	10.1675	10.4742	10.0245	10.0816	10.5946	Homo sapiens	1065	>sp|P48651|PTSS1_HUMAN Phosphatidylserine synthase 1 OS=Homo sapiens GN=PTDSS1 PE=1 SV=1	PTDSS1	55527.61	P48651	P48651	2	0
10.5692	10.8078	10.5939	11.0054	11.7147	11.1066	10.056	10.2849	10.06	9.91023	9.39885	11.8055	10.5913	10.3337	8.72172	10.7157	9.91633	9.90578	Homo sapiens	1066	>sp|P48729|KC1A_HUMAN Casein kinase I isoform alpha OS=Homo sapiens GN=CSNK1A1 PE=1 SV=2;>sp|Q8N752|KC1AL_HUMAN Casein kinase I isoform alpha-like OS=Homo sapiens GN=CSNK1A1L PE=2 SV=2	CSNK1A1;CSNK1A1L	38914.85;39085.9	P48729;Q8N752	P48729;Q8N752	1	0
7.64402	8.19831	9.62457	9.12084	7.57013	7.29751	6.28673	7.33864	8.78331	7.07713	7.78499	7.39334	8.71417	9.27662	8.5866	8.49105	7.87444	8.62926	Homo sapiens	1067	>sp|P48730|KC1D_HUMAN Casein kinase I isoform delta OS=Homo sapiens GN=CSNK1D PE=1 SV=2;>sp|P49674|KC1E_HUMAN Casein kinase I isoform epsilon OS=Homo sapiens GN=CSNK1E PE=1 SV=1	CSNK1D;CSNK1E	47330.07;47315.08	P48730;P49674	P48730;P49674	1	0.000342818
16.3658	15.9098	15.9983	15.8836	15.7715	15.5858	15.4706	15.7146	15.8335	15.6204	15.2227	15.1356	14.8019	15.1376	15.4219	14.572	14.3222	14.281	Homo sapiens	1068	>sp|P48735|IDHP_HUMAN Isocitrate dehydrogenase [NADP], mitochondrial OS=Homo sapiens GN=IDH2 PE=1 SV=2	IDH2	50909.27	P48735	P48735	16	0
14.352	14.2956	14.5291	14.112	14.6565	14.7521	15.1004	14.5718	14.6686	15.3342	15.3311	15.4321	15.1552	14.844	15.2647	15.4377	15.5121	15.1103	Homo sapiens	1069	>sp|P48739|PIPNB_HUMAN Phosphatidylinositol transfer protein beta isoform OS=Homo sapiens GN=PITPNB PE=1 SV=2	PITPNB	31540.06	P48739	P48739	10	0
13.1849	13.348	13.0147	13.0109	13.0438	13.1688	13.0201	13.2496	13.0265	12.7913	12.0162	12.7815	12.8419	13.1326	12.8122	12.9597	12.5971	12.5757	Homo sapiens	1070	>sp|P49005|DPOD2_HUMAN DNA polymerase delta subunit 2 OS=Homo sapiens GN=POLD2 PE=1 SV=1	POLD2	51289.46	P49005	P49005	3	0
7.05658	5.986	8.59459	8.09937	9.06233	7.94656	9.35326	8.15956	8.46438	8.32838	7.55896	8.92279	8.5031	8.12196	10.2113	7.91387	8.10851	5.13331	Homo sapiens	1071	>sp|P49006|MRP_HUMAN MARCKS-related protein OS=Homo sapiens GN=MARCKSL1 PE=1 SV=2	MARCKSL1	19528.79	P49006	P49006	1	0
15.8568	15.7094	15.6421	15.4959	15.9543	15.7397	15.4978	15.8605	15.9204	15.3129	15.0138	15.1607	14.7757	15.2537	15.1504	15.4959	15.3757	15.3028	Homo sapiens	1072	>sp|P49023|PAXI_HUMAN Paxillin OS=Homo sapiens GN=PXN PE=1 SV=3	PXN	64505.3	P49023	P49023	10	0
16.28	16.3729	16.3403	16.2141	16.5781	16.7603	16.5048	16.5006	16.5896	17.2109	17.4938	17.3266	17.2127	16.9144	17.1082	17.1309	17.2395	17.1662	Homo sapiens	1073	>sp|P49189|AL9A1_HUMAN 4-trimethylaminobutyraldehyde dehydrogenase OS=Homo sapiens GN=ALDH9A1 PE=1 SV=3	ALDH9A1	53801.9	P49189	P49189	17	0
17.6223	17.419	17.4795	17.3934	17.2806	17.0503	16.8072	17.2065	17.2564	15.8132	15.4299	15.79	15.7987	16.4799	15.8995	15.5771	15.6083	15.664	Homo sapiens	1074	>sp|P49207|RL34_HUMAN 60S ribosomal protein L34 OS=Homo sapiens GN=RPL34 PE=1 SV=3	RPL34	13292.95	P49207	P49207	7	0
10.3886	9.62425	10.3814	9.80653	11.4138	11.0218	10.0464	11.067	9.76485	9.51907	10.0882	10.355	11.3994	11.5381	10.7023	10.5587	10.2173	10.603	Homo sapiens	1075	>sp|P49247|RPIA_HUMAN Ribose-5-phosphate isomerase OS=Homo sapiens GN=RPIA PE=1 SV=3	RPIA	33268.94	P49247	P49247	3	0
16.7222	16.8832	16.7973	16.4263	16.5583	16.6733	16.1152	16.634	16.6544	16.5358	16.8629	16.7559	16.5294	16.7679	16.4809	16.4001	16.579	16.6007	Homo sapiens	1076	>sp|P49257|LMAN1_HUMAN Protein ERGIC-53 OS=Homo sapiens GN=LMAN1 PE=1 SV=2	LMAN1	57548.95	P49257	P49257	13	0
14.3845	13.8579	14.3541	14.585	14.4086	14.3755	14.6655	14.4644	14.3979	15.3076	15.0599	15.7395	14.7732	14.6876	14.9328	15.6768	15.7327	14.9466	Homo sapiens	1077	>sp|P49321|NASP_HUMAN Nuclear autoantigenic sperm protein OS=Homo sapiens GN=NASP PE=1 SV=2	NASP	85237.71	P49321	P49321	13	0
15.9647	15.9388	15.8055	16.7985	17.2106	16.486	16.9432	16.5352	17.1699	14.9216	14.6637	15.0451	16.4935	16.9565	16.4919	16.5051	16.4495	16.458	Homo sapiens	1078	>sp|P49327|FAS_HUMAN Fatty acid synthase OS=Homo sapiens GN=FASN PE=1 SV=3	FASN	273426.6	P49327	P49327	39	0
16.096	16.1166	16.061	16.0835	16.1742	16.0022	16.0918	16.197	16.1161	15.8975	16.0542	16.0149	15.9102	15.998	15.919	16.0768	16.0969	16.083	Homo sapiens	1079	>sp|P49368|TCPG_HUMAN T-complex protein 1 subunit gamma OS=Homo sapiens GN=CCT3 PE=1 SV=4	CCT3	60533.88	P49368	P49368	33	0
11.3033	10.8667	10.8234	11.6867	10.2758	10.8099	10.9336	10.8677	10.4626	11.4667	11.9102	10.8888	11.5691	11.6607	11.2124	10.8858	10.9441	12.1171	Homo sapiens	1080	>sp|P49406|RM19_HUMAN 39S ribosomal protein L19, mitochondrial OS=Homo sapiens GN=MRPL19 PE=1 SV=2	MRPL19	33534.95	P49406	P49406	4	0
17.6127	17.6489	17.3351	17.6138	17.3909	17.1505	17.2074	17.3056	17.3473	17.5183	17.236	17.2876	16.927	17.3076	17.1841	16.9607	16.8436	16.9248	Homo sapiens	1081	>sp|P49411|EFTU_HUMAN Elongation factor Tu, mitochondrial OS=Homo sapiens GN=TUFM PE=1 SV=2	TUFM	49541.53	P49411	P49411	26	0
12.6814	12.8526	13.3053	12.9765	13.788	13.5234	13.785	13.3274	13.1906	14.4653	14.7491	14.5848	14.7134	14.4321	14.3668	14.457	14.2302	14.5719	Homo sapiens	1082	>sp|P49419|AL7A1_HUMAN Alpha-aminoadipic semialdehyde dehydrogenase OS=Homo sapiens GN=ALDH7A1 PE=1 SV=5	ALDH7A1	58487.15	P49419	P49419	8	0
12.0846	11.651	4.4635	12.3153	11.4712	11.2255	12.01	11.8341	11.8696	11.3646	12.0168	11.8249	12.9035	13.5845	12.3721	12.5975	12.6763	13.3747	Homo sapiens	1083	>sp|P49427|UB2R1_HUMAN Ubiquitin-conjugating enzyme E2 R1 OS=Homo sapiens GN=CDC34 PE=1 SV=2	CDC34	26736.76	P49427	P49427	3	0
15.9843	16.2578	16.3464	16.0224	16.0679	16.4186	15.8793	16.2635	16.281	17.0185	17.1756	16.8486	16.5522	16.6983	16.763	16.6575	16.9708	16.9249	Homo sapiens	1084	>sp|P49458|SRP09_HUMAN Signal recognition particle 9 kDa protein OS=Homo sapiens GN=SRP9 PE=1 SV=2	SRP9	10111.73	P49458	P49458	5	0
12.0089	11.8619	11.6089	11.4366	11.1497	11.238	11.8757	11.5439	11.0602	12.1875	12.8681	12.6234	12.7532	12.447	12.5095	12.8715	12.885	12.8734	Homo sapiens	1085	>sp|P49459|UBE2A_HUMAN Ubiquitin-conjugating enzyme E2 A OS=Homo sapiens GN=UBE2A PE=1 SV=2	UBE2A	17315.42	P49459	P49459	1	0
14.9601	15.279	15.6036	15.4053	15.7627	15.044	15.257	15.2442	14.6649	15.8129	16.0462	16.2385	15.7203	15.5967	15.8426	16.3607	16.2457	15.8102	Homo sapiens	1086	>sp|P49585|PCY1A_HUMAN Choline-phosphate cytidylyltransferase A OS=Homo sapiens GN=PCYT1A PE=1 SV=2	PCYT1A	41731	P49585	P49585	8	0
15.3954	15.6116	15.6843	15.5275	15.6132	15.5601	15.4724	15.5851	15.7345	15.9705	16.0099	16.0205	16.0921	16.2148	16.0316	15.6582	15.7816	15.8114	Homo sapiens	1087	>sp|P49588|SYAC_HUMAN Alanine--tRNA ligase, cytoplasmic OS=Homo sapiens GN=AARS PE=1 SV=2	AARS	106810.44	P49588	P49588	25	0
14.761	14.6767	14.8005	14.7052	15.1101	14.8998	15.2087	14.8181	14.786	14.638	14.8581	14.7884	15.3402	15.1697	15.2657	15.0801	15.1656	15.0717	Homo sapiens	1088	>sp|P49589|SYCC_HUMAN Cysteine--tRNA ligase, cytoplasmic OS=Homo sapiens GN=CARS PE=1 SV=3	CARS	85473.34	P49589	P49589	15	0
15.7259	15.6662	16.1521	15.8051	16.0843	16.2103	15.9856	16.1468	15.8214	16.8065	16.8677	16.9825	16.6854	16.6353	16.7751	17.1026	17.177	16.8797	Homo sapiens	1089	>sp|P49591|SYSC_HUMAN Serine--tRNA ligase, cytoplasmic OS=Homo sapiens GN=SARS PE=1 SV=3	SARS	58777.26	P49591	P49591	18	0
10.9348	11.5989	10.3336	11.6319	12.2437	9.96702	10.8711	11.6631	11.7402	9.19071	8.62266	10.5307	9.82908	11.0385	8.28983	10.4149	9.6382	10.5465	Homo sapiens	1090	>sp|P49642|PRI1_HUMAN DNA primase small subunit OS=Homo sapiens GN=PRIM1 PE=1 SV=1	PRIM1	49902.03	P49642	P49642	2	0.001002674
7.75609	8.57679	8.32032	6.81806	8.15491	6.44755	8.50654	6.29361	7.86354	7.14848	8.45724	8.02544	8.20766	8.31971	8.00593	8.78791	7.59539	8.22682	Homo sapiens	1091	>sp|P49711|CTCF_HUMAN Transcriptional repressor CTCF OS=Homo sapiens GN=CTCF PE=1 SV=1	CTCF	82785.39	P49711	P49711	4	0
11.3118	11.0031	11.6106	11.275	11.3967	11.7061	11.8629	11.3612	11.03	11.5036	11.7308	11.3829	11.2232	11.1128	11.2791	11.1742	11.6103	11.5155	Homo sapiens	1092	>sp|P49720|PSB3_HUMAN Proteasome subunit beta type-3 OS=Homo sapiens GN=PSMB3 PE=1 SV=2	PSMB3	22948.88	P49720	P49720	9	0
15.6904	15.77	15.7614	15.7633	15.9951	15.9991	16.1243	15.83	15.9614	15.723	15.6843	15.8324	15.4478	15.4357	15.5358	15.7975	16.0281	15.69	Homo sapiens	1093	>sp|P49721|PSB2_HUMAN Proteasome subunit beta type-2 OS=Homo sapiens GN=PSMB2 PE=1 SV=1	PSMB2	22836.27	P49721	P49721	6	0
14.4779	14.4436	14.4852	14.5281	14.2589	14.0531	13.6574	14.1127	14.4307	13.4373	12.9775	13.4172	13.4449	13.7125	13.4928	13.3182	13.143	13.1066	Homo sapiens	1094	>sp|P49736|MCM2_HUMAN DNA replication licensing factor MCM2 OS=Homo sapiens GN=MCM2 PE=1 SV=4	MCM2	101896.09	P49736	P49736	23	0
13.7654	13.7167	13.9048	13.8708	14.0469	13.8665	14.2355	13.9566	13.8348	13.3747	13.5484	13.2381	13.0413	12.847	13.2433	13.0693	12.9807	12.9493	Homo sapiens	1095	>sp|P49748|ACADV_HUMAN Very long-chain specific acyl-CoA dehydrogenase, mitochondrial OS=Homo sapiens GN=ACADVL PE=1 SV=1	ACADVL	70390.11	P49748	P49748	9	0
9.58188	8.98207	7.1174	9.4425	9.18322	9.13324	7.90758	9.83321	8.66668	9.48779	7.95816	9.65798	9.05708	8.80396	9.16297	10.2044	8.57475	8.22214	Homo sapiens	1096	>sp|P49750|YLPM1_HUMAN YLP motif-containing protein 1 OS=Homo sapiens GN=YLPM1 PE=1 SV=3	YLPM1	219985.15	P49750	P49750	1	0.001002674
14.6065	14.5059	14.6967	14.7186	14.6107	14.9252	14.5088	14.6237	14.7415	14.7474	14.5787	14.5571	14.6461	14.9418	14.869	14.805	14.7849	14.8258	Homo sapiens	1097	>sp|P49755|TMEDA_HUMAN Transmembrane emp24 domain-containing protein 10 OS=Homo sapiens GN=TMED10 PE=1 SV=2	TMED10	24975.97	P49755	P49755	9	0
10.5384	10.7305	10.8374	10.8357	10.7697	9.83104	10.6005	9.93113	9.63484	10.5486	10.2132	9.43161	10.5795	10.5257	10.4044	10.1589	9.85827	11.1061	Homo sapiens	1098	>sp|P49756|RBM25_HUMAN RNA-binding protein 25 OS=Homo sapiens GN=RBM25 PE=1 SV=3	RBM25	100185.49	P49756	P49756	14	0
12.0293	11.9714	11.7702	12.1252	12.7796	12.853	12.4619	12.7394	12.402	12.53	12.8097	12.2102	12.8148	12.7195	12.7296	12.7318	12.9175	13.3219	Homo sapiens	1099	>sp|P49768|PSN1_HUMAN Presenilin-1 OS=Homo sapiens GN=PSEN1 PE=1 SV=1;>sp|P49810|PSN2_HUMAN Presenilin-2 OS=Homo sapiens GN=PSEN2 PE=1 SV=1	PSEN1;PSEN2	52667.84;50140.38	P49768;P49810	P49768;P49810	1	0.000674992
11.6185	11.7307	10.5379	11.6606	11.0552	11.8609	10.6836	10.7575	10.9437	11.4746	12.5377	11.5271	13.172	13.8567	13.4991	12.4874	13.1131	13.2945	Homo sapiens	1100	>sp|P49770|EI2BB_HUMAN Translation initiation factor eIF-2B subunit beta OS=Homo sapiens GN=EIF2B2 PE=1 SV=3	EIF2B2	38989.62	P49770	P49770	4	0
15.0075	15.0266	15.0666	15.0938	15.0453	15.2284	14.3505	15.2324	14.7347	15.358	15.4477	15.2769	14.8309	15.0031	15.0483	15.0838	15.1614	15.1172	Homo sapiens	1101	>sp|P49773|HINT1_HUMAN Histidine triad nucleotide-binding protein 1 OS=Homo sapiens GN=HINT1 PE=1 SV=2	HINT1	13801.9	P49773	P49773	5	0
13.5647	12.9918	13.3079	13.9694	13.6463	13.2772	13.9754	13.554	13.9805	10.9578	11.1374	15.3617	11.952	11.9053	13.8813	12.7238	12.4918	6.34102	Homo sapiens	1102	>sp|P49790|NU153_HUMAN Nuclear pore complex protein Nup153 OS=Homo sapiens GN=NUP153 PE=1 SV=2	NUP153	153938.37	P49790	P49790	4	0
13.9349	13.8851	13.7319	14.0202	13.7151	13.7168	13.64	13.7646	13.9556	12.9079	13.192	13.2761	13.5519	13.3413	13.0304	12.752	12.8277	12.9799	Homo sapiens	1103	>sp|P49792|RBP2_HUMAN E3 SUMO-protein ligase RanBP2 OS=Homo sapiens GN=RANBP2 PE=1 SV=2	RANBP2	358199.23	P49792	P49792	33	0
12.4464	12.9095	12.8482	12.0103	11.9561	11.9635	11.3974	12.1301	10.2722	10.2002	9.02985	8.95288	10.6131	11.0093	12.2972	10.1077	10.4569	9.45846	Homo sapiens	1104	>sp|P49821|NDUV1_HUMAN NADH dehydrogenase [ubiquinone] flavoprotein 1, mitochondrial OS=Homo sapiens GN=NDUFV1 PE=1 SV=4	NDUFV1	50817.08	P49821	P49821	1	0
10.0188	9.02204	9.68004	9.24413	10.0657	9.80897	10.7104	10.429	8.77858	12.1427	12.0043	11.5536	11.79	11.4373	11.5648	10.6628	11.6371	11.7188	Homo sapiens	1105	>sp|P49902|5NTC_HUMAN Cytosolic purine 5'-nucleotidase OS=Homo sapiens GN=NT5C2 PE=1 SV=1	NT5C2	64969.8	P49902	P49902	8	0
12.9553	13.208	12.4253	13.4162	13.6411	13.8277	13.882	13.3992	13.5518	13.991	13.9367	14.3531	14.0679	14.0039	13.6454	13.7021	13.9846	13.8446	Homo sapiens	1106	>sp|P49903|SPS1_HUMAN Selenide, water dikinase 1 OS=Homo sapiens GN=SEPHS1 PE=1 SV=2	SEPHS1	42910.58	P49903	P49903	4	0.000342818
12.7555	14.121	12.7761	11.946	13.3086	10.7795	13.227	13.3698	13.2062	11.8123	12.9709	13.0911	13.6535	13.2449	13.1082	13.5613	13.5361	13.1902	Homo sapiens	1107	>sp|P49914|MTHFS_HUMAN 5-formyltetrahydrofolate cyclo-ligase OS=Homo sapiens GN=MTHFS PE=1 SV=2	MTHFS	23255.65	P49914	P49914	1	0.000342818
14.6451	14.7368	14.4499	14.7357	14.383	14.244	14.3799	14.4097	14.4523	14.541	14.3053	14.1728	14.1942	14.5429	14.3813	14.0357	13.862	14.1866	Homo sapiens	1108	>sp|P49915|GUAA_HUMAN GMP synthase [glutamine-hydrolyzing] OS=Homo sapiens GN=GMPS PE=1 SV=1	GMPS	76715.41	P49915	P49915	24	0
12.8156	12.9322	12.7882	13.1878	12.8018	12.964	13.0732	12.8304	13.1553	12.3601	13.8687	13.371	13.4331	13.158	13.3974	13.4699	13.3608	13.057	Homo sapiens	1109	>sp|P49959|MRE11_HUMAN Double-strand break repair protein MRE11A OS=Homo sapiens GN=MRE11A PE=1 SV=3	MRE11A	80593.26	P49959	P49959	11	0
15.9118	16.0807	16.2903	15.7647	16.2603	16.3174	15.9562	16.279	16.0113	16.6434	16.677	16.4208	16.0751	16.2474	16.2593	16.1423	16.2175	16.3212	Homo sapiens	1110	>sp|P50213|IDH3A_HUMAN Isocitrate dehydrogenase [NAD] subunit alpha, mitochondrial OS=Homo sapiens GN=IDH3A PE=1 SV=1	IDH3A	39591.69	P50213	P50213	12	0
15.5892	15.9946	15.1502	15.5622	15.9186	15.9936	15.8094	15.7087	16.1187	16.3654	16.6295	16.5493	16.3412	16.5931	16.5658	16.2108	16.5446	16.2271	Homo sapiens	1111	>sp|P50238|CRIP1_HUMAN Cysteine-rich protein 1 OS=Homo sapiens GN=CRIP1 PE=1 SV=3	CRIP1	8532.82	P50238	P50238	4	0
17.2737	17.3771	17.5514	17.3009	17.4835	17.5457	17.4662	17.5479	17.5706	17.4898	17.7276	17.8501	17.5327	17.5335	17.5573	17.53	17.6081	17.3035	Homo sapiens	1112	>sp|P50395|GDIB_HUMAN Rab GDP dissociation inhibitor beta OS=Homo sapiens GN=GDI2 PE=1 SV=2	GDI2	50663.24	P50395	P50395	24	0
14.2602	13.6625	13.0364	14.3357	13.9892	13.7028	13.6013	13.4953	13.9001	12.0985	12.1316	12.6209	12.1973	12.1463	12.9047	14.2219	14.0543	12.8993	Homo sapiens	1113	>sp|P50402|EMD_HUMAN Emerin OS=Homo sapiens GN=EMD PE=1 SV=1	EMD	28993.85	P50402	P50402	4	0
16.8259	16.8568	16.7165	16.8452	16.981	16.7334	16.8634	16.9197	16.9415	16.7518	16.9071	16.7985	16.8564	16.9736	16.9537	17.2125	17.2416	17.2194	Homo sapiens	1114	>sp|P50454|SERPH_HUMAN Serpin H1 OS=Homo sapiens GN=SERPINH1 PE=1 SV=2	SERPINH1	46440.54	P50454	P50454	29	0
10.9297	7.84965	9.16141	10.668	9.61174	7.4143	10.5553	11.1551	11.1335	9.71874	8.88065	10.4966	10.5685	8.64388	10.2705	12.0421	12.0122	10.1659	Homo sapiens	1115	>sp|P50479|PDLI4_HUMAN PDZ and LIM domain protein 4 OS=Homo sapiens GN=PDLIM4 PE=1 SV=2	PDLIM4	35398	P50479	P50479	1	0.000342818
16.0295	16.1373	16.2585	16.0707	16.5188	16.5153	16.4829	16.4985	16.3164	16.6497	16.9399	17.0806	17.007	16.6695	16.8568	17.106	17.2945	16.8959	Homo sapiens	1116	>sp|P50502|F10A1_HUMAN Hsc70-interacting protein OS=Homo sapiens GN=ST13 PE=1 SV=2	ST13	41331.69	P50502	P50502	16	0
16.5078	16.6157	16.5404	16.574	16.8556	16.9342	16.7372	16.7275	16.8601	17.088	17.1367	17.4354	16.9067	16.9502	17.0699	17.5699	17.7204	17.1807	Homo sapiens	1117	>sp|P50552|VASP_HUMAN Vasodilator-stimulated phosphoprotein OS=Homo sapiens GN=VASP PE=1 SV=3	VASP	39829.72	P50552	P50552	12	0
14.7225	14.6209	14.6528	14.5606	14.5292	14.1512	14.2744	14.5551	14.6641	13.8433	13.5535	13.3174	13.7883	14.392	14.1863	13.8411	13.5886	13.9998	Homo sapiens	1118	>sp|P50570|DYN2_HUMAN Dynamin-2 OS=Homo sapiens GN=DNM2 PE=1 SV=2	DNM2	98064.31	P50570	P50570	21	0
11.7069	11.542	11.3745	12.4074	12.1031	12.2905	11.9426	11.6789	11.5177	11.8503	12.0605	12.1388	12.1502	12.4021	12.076	11.9496	12.5118	12.2474	Homo sapiens	1119	>sp|P50579|MAP2_HUMAN Methionine aminopeptidase 2 OS=Homo sapiens GN=METAP2 PE=1 SV=1	METAP2	52891.56	P50579	P50579	4	0
12.3112	13.2037	13.256	12.6964	14.0797	13.4326	13.2692	13.5203	13.2723	13.3019	12.6186	13.076	14.2043	13.7528	13.8607	14.4624	14.0766	14.2717	Homo sapiens	1120	>sp|P50583|AP4A_HUMAN Bis(5'-nucleosyl)-tetraphosphatase [asymmetrical] OS=Homo sapiens GN=NUDT2 PE=1 SV=3	NUDT2	16829.24	P50583	P50583	3	0
7.23309	8.03027	6.91425	8.92073	9.35118	8.87938	7.99515	8.16839	8.345	8.78204	7.92393	9.76777	8.37896	8.38211	7.41278	8.63525	8.69125	8.21623	Homo sapiens	1121	>sp|P50748|KNTC1_HUMAN Kinetochore-associated protein 1 OS=Homo sapiens GN=KNTC1 PE=1 SV=1	KNTC1	250748.53	P50748	P50748	1	0.001002674
10.6303	9.67407	10.2014	10.2994	9.74411	9.56865	10.1941	9.16591	10.1968	10.0325	10.1186	10.0314	10.5034	10.1706	10.3326	9.8248	9.74687	9.83431	Homo sapiens	1122	>sp|P50750|CDK9_HUMAN Cyclin-dependent kinase 9 OS=Homo sapiens GN=CDK9 PE=1 SV=3	CDK9	42777.52	P50750	P50750	6	0
10.5987	10.4279	9.9218	10.9477	10.8073	9.86044	10.3774	10.2567	10.262	10.5224	9.80449	9.17763	10.038	10.5903	9.74934	9.80976	9.46908	11.19	Homo sapiens	1123	>sp|P50851|LRBA_HUMAN Lipopolysaccharide-responsive and beige-like anchor protein OS=Homo sapiens GN=LRBA PE=1 SV=4	LRBA	319107.89	P50851	P50851	14	0
7.82294	8.28479	7.73592	8.26705	9.61465	8.31128	9.20712	7.32855	6.6621	8.49685	11.1869	9.38649	10.8782	11.6019	10.988	10.4867	11.0625	11.482	Homo sapiens	1124	>sp|P50895|BCAM_HUMAN Basal cell adhesion molecule OS=Homo sapiens GN=BCAM PE=1 SV=2	BCAM	67404.79	P50895	P50895	1	0
16.2957	16.415	16.3601	16.2814	16.1074	15.8954	15.9587	15.9721	16.2681	14.1307	13.9067	13.3801	13.9452	14.5042	14.4119	13.9477	13.9544	14.4024	Homo sapiens	1125	>sp|P50914|RL14_HUMAN 60S ribosomal protein L14 OS=Homo sapiens GN=RPL14 PE=1 SV=4	RPL14	23431.84	P50914	P50914	7	0
17.2959	17.4502	17.4976	17.3364	17.607	17.7982	17.6223	17.7042	17.5489	17.7723	18.1063	18.0274	17.9861	17.791	17.8522	18.1235	18.2906	18.1553	Homo sapiens	1126	>sp|P50990|TCPQ_HUMAN T-complex protein 1 subunit theta OS=Homo sapiens GN=CCT8 PE=1 SV=4	CCT8	59620.58	P50990	P50990	38	0
18.608	18.7186	18.3846	18.6084	18.7699	18.6415	18.6435	18.788	18.7057	18.1596	18.4119	18.5949	18.5857	18.7774	18.5397	18.7493	18.8113	18.613	Homo sapiens	1127	>sp|P50991|TCPD_HUMAN T-complex protein 1 subunit delta OS=Homo sapiens GN=CCT4 PE=1 SV=4	CCT4	57924.23	P50991	P50991	35	0
15.9889	16.153	16.2456	16.0102	16.3103	16.3374	16.1114	16.3358	16.1854	16.4999	16.7769	16.8288	16.8662	16.688	16.6526	16.5407	16.7933	16.601	Homo sapiens	1128	>sp|P50995|ANX11_HUMAN Annexin A11 OS=Homo sapiens GN=ANXA11 PE=1 SV=1	ANXA11	54389.71	P50995	P50995	19	0
10.9013	10.2076	9.83763	10.5677	10.9712	10.2078	11.1778	10.9023	10.2911	11.1032	10.9759	11.8128	11.4454	12.1228	11.729	11.3857	11.7994	10.8744	Homo sapiens	1129	>sp|P51003|PAPOA_HUMAN Poly(A) polymerase alpha OS=Homo sapiens GN=PAPOLA PE=1 SV=4	PAPOLA	82842.57	P51003	P51003	5	0
14.9789	14.6309	14.4312	14.7567	14.5156	14.1292	14.7575	14.3926	14.7309	14.578	14.6768	14.4119	14.5652	14.5026	14.4304	14.4133	14.3893	14.7203	Homo sapiens	1130	>sp|P51114|FXR1_HUMAN Fragile X mental retardation syndrome-related protein 1 OS=Homo sapiens GN=FXR1 PE=1 SV=3	FXR1	69720.78	P51114	P51114	16	0
14.5322	14.6668	14.2634	14.4668	14.3455	14.2181	14.2748	14.1447	14.2057	13.6542	13.6624	13.548	13.9197	13.9231	13.7788	14.0963	13.9575	14.2798	Homo sapiens	1131	>sp|P51116|FXR2_HUMAN Fragile X mental retardation syndrome-related protein 2 OS=Homo sapiens GN=FXR2 PE=1 SV=2	FXR2	74223.3	P51116	P51116	12	0
16.2864	16.1419	16.1463	16.2198	16.409	16.3504	16.3915	16.3933	16.2414	16.9965	17.104	17.2251	17.3258	17.1419	17.0488	17.1984	17.2	17.2094	Homo sapiens	1132	>sp|P51148|RAB5C_HUMAN Ras-related protein Rab-5C OS=Homo sapiens GN=RAB5C PE=1 SV=2	RAB5C	23482.55	P51148	P51148	13	0
16.3337	16.4445	16.5546	16.5253	16.8168	16.7737	16.7734	16.7867	16.6792	16.5855	16.9096	17.0691	16.932	16.8087	16.8682	17.0836	17.2112	16.828	Homo sapiens	1133	>sp|P51149|RAB7A_HUMAN Ras-related protein Rab-7a OS=Homo sapiens GN=RAB7A PE=1 SV=1	RAB7A	23489.74	P51149	P51149	13	0
10.5448	11.4507	11.9321	11.5312	11.3546	10.1495	10.3333	11.181	11.0139	11.0198	11.0368	10.8211	10.6838	10.8817	11.0686	10.1854	9.4656	9.74687	Homo sapiens	1134	>sp|P51151|RAB9A_HUMAN Ras-related protein Rab-9A OS=Homo sapiens GN=RAB9A PE=1 SV=1;>sp|Q9NP90|RAB9B_HUMAN Ras-related protein Rab-9B OS=Homo sapiens GN=RAB9B PE=1 SV=1	RAB9A;RAB9B	22837.58;22719.47	P51151;Q9NP90	P51151;Q9NP90	1	0
12.9591	15.9346	15.13	15.972	15.8743	16.1031	15.4756	15.6592	15.5284	16.2273	15.778	15.6361	16.822	16.7245	16.7933	16.0752	15.6737	16.221	Homo sapiens	1135	>sp|P51153|RAB13_HUMAN Ras-related protein Rab-13 OS=Homo sapiens GN=RAB13 PE=1 SV=1	RAB13	22774.12	P51153	P51153	2	0
12.5577	12.9668	12.6948	13.1008	13.2232	12.7247	13.4342	12.8504	13.2158	13.1132	13.9711	13.5972	13.3743	13.2909	13.4694	13.7946	14.0035	13.7072	Homo sapiens	1136	>sp|P51397|DAP1_HUMAN Death-associated protein 1 OS=Homo sapiens GN=DAP PE=1 SV=3	DAP	11164.57	P51397	P51397	1	0
11.2685	10.0535	10.3595	10.3406	10.4806	9.73373	9.11495	9.44778	9.78414	10.7505	9.80283	10.5763	9.79351	10.4154	9.7079	9.50038	8.94409	9.31918	Homo sapiens	1137	>sp|P51398|RT29_HUMAN 28S ribosomal protein S29, mitochondrial OS=Homo sapiens GN=DAP3 PE=1 SV=1	DAP3	45566.44	P51398	P51398	4	0
11.8106	12.1849	11.9362	11.7418	12.1029	11.8102	12.4215	12.2494	11.7532	13.1074	13.0376	13.3268	13.4392	13.0301	13.0272	13.0814	12.8194	12.9036	Homo sapiens	1138	>sp|P51452|DUS3_HUMAN Dual specificity protein phosphatase 3 OS=Homo sapiens GN=DUSP3 PE=1 SV=1	DUSP3	20478.28	P51452	P51452	5	0
13.8987	14.3738	12.5716	14.9481	14.0791	12.0206	13.2475	14.4964	14.4284	13.8001	13.1784	14.9513	13.6161	13.5383	14.5411	13.1482	12.9102	10.6033	Homo sapiens	1139	>sp|P51532|SMCA4_HUMAN Transcription activator BRG1 OS=Homo sapiens GN=SMARCA4 PE=1 SV=2	SMARCA4	184645.58	P51532	P51532	6	0
12.4838	12.3229	12.3789	12.6111	12.519	12.4721	12.4462	12.3332	12.789	12.2433	11.7823	11.6348	11.8005	12.2765	11.6588	12.0391	12.4221	12.9882	Homo sapiens	1140	>sp|P51553|IDH3G_HUMAN Isocitrate dehydrogenase [NAD] subunit gamma, mitochondrial OS=Homo sapiens GN=IDH3G PE=1 SV=1	IDH3G	42794.29	P51553	P51553	1	0.000674992
12.2834	12.739	12.6065	12.5558	12.9742	13.11	12.3026	12.8864	12.6772	11.5983	11.6967	11.4354	12.6783	12.9569	13.129	12.129	12.04	11.9853	Homo sapiens	1141	>sp|P51570|GALK1_HUMAN Galactokinase OS=Homo sapiens GN=GALK1 PE=1 SV=1	GALK1	42272.23	P51570	P51570	6	0
14.1038	14.2142	14.1171	14.4076	13.7963	13.7991	13.192	13.5357	13.5282	13.8335	13.3857	13.9179	13.9648	13.7587	13.8725	13.6785	13.4612	13.2508	Homo sapiens	1142	>sp|P51571|SSRD_HUMAN Translocon-associated protein subunit delta OS=Homo sapiens GN=SSR4 PE=1 SV=1	SSR4	18998.61	P51571	P51571	6	0
16.4918	16.6536	16.6389	16.5602	16.8529	16.9649	16.7963	16.8153	16.8384	17.1791	17.1451	17.078	17.2974	17.1698	17.1203	17.1796	17.1961	17.3852	Homo sapiens	1143	>sp|P51572|BAP31_HUMAN B-cell receptor-associated protein 31 OS=Homo sapiens GN=BCAP31 PE=1 SV=3	BCAP31	27991.6	P51572	P51572	23	0
13.6188	13.4393	13.4193	13.6963	13.5798	13.4147	13.7822	13.4371	13.712	13.9951	13.9284	14.113	13.8513	14.2909	13.9758	13.663	13.7245	13.6377	Homo sapiens	1144	>sp|P51610|HCFC1_HUMAN Host cell factor 1 OS=Homo sapiens GN=HCFC1 PE=1 SV=2	HCFC1	208732.49	P51610	P51610	14	0
14.0416	13.8694	14.0971	13.8717	14.095	13.8939	14.1909	13.6514	14.046	15.421	15.2045	14.6874	14.5884	14.5092	14.8629	14.6565	14.344	14.8114	Homo sapiens	1145	>sp|P51648|AL3A2_HUMAN Fatty aldehyde dehydrogenase OS=Homo sapiens GN=ALDH3A2 PE=1 SV=1	ALDH3A2	54847.83	P51648	P51648	8	0
11.45	11.2398	11.6742	11.4061	11.4817	11.6544	11.8501	11.4608	10.1969	12.5138	12.871	12.7864	12.8377	12.5576	12.6334	12.4661	12.5152	12.4609	Homo sapiens	1146	>sp|P51659|DHB4_HUMAN Peroxisomal multifunctional enzyme type 2 OS=Homo sapiens GN=HSD17B4 PE=1 SV=3	HSD17B4	79686.35	P51659	P51659	7	0
14.5582	14.7235	15.1178	14.8696	15.0523	15.1378	15.1548	15.0208	14.7204	15.7583	15.9401	15.7171	15.5302	15.616	15.7382	15.7355	15.7676	15.7185	Homo sapiens	1147	>sp|P51665|PSMD7_HUMAN 26S proteasome non-ATPase regulatory subunit 7 OS=Homo sapiens GN=PSMD7 PE=1 SV=2	PSMD7	37025.4	P51665	P51665	18	0
11.6737	12.1168	11.9662	11.7786	12.118	11.5214	11.833	11.7358	11.5759	11.6123	11.5675	12.1064	12.6121	12.1947	12.1114	12.4152	12.0306	11.9984	Homo sapiens	1148	>sp|P51812|KS6A3_HUMAN Ribosomal protein S6 kinase alpha-3 OS=Homo sapiens GN=RPS6KA3 PE=1 SV=1	RPS6KA3	83735.98	P51812	P51812	13	0
15.4171	15.3804	15.0816	15.2393	15.8735	14.9789	15.8291	15.5121	15.4645	15.0712	15.8335	16.0239	16.3601	15.6173	15.8426	16.5735	16.7398	16.2312	Homo sapiens	1149	>sp|P51858|HDGF_HUMAN Hepatoma-derived growth factor OS=Homo sapiens GN=HDGF PE=1 SV=1	HDGF	26788.28	P51858	P51858	9	0
9.87399	9.41516	9.34768	8.7517	10.1498	9.71322	8.86776	10.1392	9.45332	8.77721	7.05792	9.68878	8.31894	9.00534	10.2579	9.10907	7.59229	4.98372	Homo sapiens	1150	>sp|P51948|MAT1_HUMAN CDK-activating kinase assembly factor MAT1 OS=Homo sapiens GN=MNAT1 PE=1 SV=1	MNAT1	35822.95	P51948	P51948	1	0
11.5011	10.9142	10.6073	10.503	11.5572	11.7281	11.6923	11.3207	10.9644	11.3394	10.7885	11.127	11.1846	10.9873	11.7703	12.232	11.5263	11.1317	Homo sapiens	1151	>sp|P51965|UB2E1_HUMAN Ubiquitin-conjugating enzyme E2 E1 OS=Homo sapiens GN=UBE2E1 PE=1 SV=1	UBE2E1	21404.17	P51965	P51965	3	0
10.8431	10.5556	10.703	10.5276	10.5859	10.3342	9.883	9.15376	10.712	9.62002	8.68707	9.82136	11.3132	12.3436	11.1376	11.0778	11.6167	11.3703	Homo sapiens	1152	>sp|P51970|NDUA8_HUMAN NADH dehydrogenase [ubiquinone] 1 alpha subcomplex subunit 8 OS=Homo sapiens GN=NDUFA8 PE=1 SV=3	NDUFA8	20105.03	P51970	P51970	3	0
14.2396	14.8185	14.8748	14.318	13.6925	14.5253	13.799	13.8034	14.0437	13.9923	13.917	13.9067	13.5396	13.471	12.8021	13.4816	13.3014	14.1427	Homo sapiens	1153	>sp|P51991|ROA3_HUMAN Heterogeneous nuclear ribonucleoprotein A3 OS=Homo sapiens GN=HNRNPA3 PE=1 SV=2	HNRNPA3	39594.94	P51991	P51991	15	0
16.1862	16.2511	16.0606	16.2907	16.5472	16.1165	16.2842	16.2084	16.5459	15.8473	15.7217	16.0129	16.3069	16.6676	16.3276	16.3084	16.3948	16.2828	Homo sapiens	1154	>sp|P52209|6PGD_HUMAN 6-phosphogluconate dehydrogenase, decarboxylating OS=Homo sapiens GN=PGD PE=1 SV=3	PGD	53139.98	P52209	P52209	20	0
18.3352	18.3764	17.8057	17.8671	17.7553	17.4472	17.3221	17.6399	17.7549	15.1057	15.5921	15.8761	15.0572	15.6808	15.5084	16.2077	16.1868	15.5306	Homo sapiens	1155	>sp|P52272|HNRPM_HUMAN Heterogeneous nuclear ribonucleoprotein M OS=Homo sapiens GN=HNRNPM PE=1 SV=3	HNRNPM	77515.52	P52272	P52272	56	0
14.4326	14.577	14.0507	14.577	13.9888	13.9592	13.3467	13.9974	13.839	13.2199	13.078	13.5325	14.0234	14.4208	14.1493	14.4024	14.1688	13.9749	Homo sapiens	1156	>sp|P52292|IMA1_HUMAN Importin subunit alpha-1 OS=Homo sapiens GN=KPNA2 PE=1 SV=1	KPNA2	57861.92	P52292	P52292	9	0
13.6268	13.5838	13.3182	14.0118	13.8104	14.0332	13.834	13.8671	13.9265	13.347	13.1592	13.1697	13.4068	13.8447	13.515	13.4584	13.5309	13.6888	Homo sapiens	1157	>sp|P52294|IMA5_HUMAN Importin subunit alpha-5 OS=Homo sapiens GN=KPNA1 PE=1 SV=3	KPNA1	60221.76	P52294	P52294	2	0
12.9891	12.6836	12.7106	12.756	12.2718	12.9855	11.2606	12.4562	12.399	13.3504	13.551	13.5686	13.4462	13.8624	13.5259	12.8969	13.3608	13.1392	Homo sapiens	1158	>sp|P52298|NCBP2_HUMAN Nuclear cap-binding protein subunit 2 OS=Homo sapiens GN=NCBP2 PE=1 SV=1	NCBP2	18001.09	P52298	P52298	4	0
13.147	13.0881	13.1589	13.2081	13.4718	13.4622	13.5717	13.4331	13.2504	13.7028	14.1092	13.5145	13.4825	13.3602	13.6547	13.4825	13.615	13.7069	Homo sapiens	1159	>sp|P52306|GDS1_HUMAN Rap1 GTPase-GDP dissociation stimulator 1 OS=Homo sapiens GN=RAP1GDS1 PE=1 SV=3	RAP1GDS1	66316.84	P52306	P52306	11	0
10.3195	10.7003	10.1831	11.0587	9.02098	9.34738	9.26063	9.78409	10.3187	9.46972	8.72943	9.18224	10.4548	9.09401	10.017	9.3123	9.13647	8.89913	Homo sapiens	1160	>sp|P52434|RPAB3_HUMAN DNA-directed RNA polymerases I, II, and III subunit RPABC3 OS=Homo sapiens GN=POLR2H PE=1 SV=4	POLR2H	17143.3	P52434	P52434	2	0
16.2318	16.3501	16.6031	16.22	16.6161	16.7022	16.5876	16.6691	16.5859	17.1046	17.3442	17.4165	17.3542	16.9672	17.0874	17.3632	17.5476	17.3367	Homo sapiens	1161	>sp|P52565|GDIR1_HUMAN Rho GDP-dissociation inhibitor 1 OS=Homo sapiens GN=ARHGDIA PE=1 SV=3	ARHGDIA	23207.1	P52565	P52565	12	0
11.5048	9.62211	10.0741	11.2135	10.7718	8.35416	11.7049	8.84851	10.9412	11.0432	11.177	10.6424	6.07964	11.9117	9.53746	10.1003	10.021	9.98657	Homo sapiens	1162	>sp|P52594|AGFG1_HUMAN Arf-GAP domain and FG repeat-containing protein 1 OS=Homo sapiens GN=AGFG1 PE=1 SV=2	AGFG1	58260.15	P52594	P52594	3	0
16.8262	16.7455	16.8252	16.8558	16.7993	16.6866	16.6239	16.7358	16.9316	16.816	16.8708	16.8293	17.001	16.8371	17.0975	16.9489	16.8356	16.7279	Homo sapiens	1163	>sp|P52597|HNRPF_HUMAN Heterogeneous nuclear ribonucleoprotein F OS=Homo sapiens GN=HNRNPF PE=1 SV=3	HNRNPF	45671.85	P52597	P52597	10	0
12.4513	12.6459	12.4732	12.4877	12.5428	11.7225	12.2603	12.0814	12.4259	11.2648	10.8331	9.60067	10.8541	11.5725	11.8842	10.9466	10.8354	11.6684	Homo sapiens	1164	>sp|P52701|MSH6_HUMAN DNA mismatch repair protein Msh6 OS=Homo sapiens GN=MSH6 PE=1 SV=2	MSH6	152785.58	P52701	P52701	9	0
10.545	10.9051	11.0751	10.8694	11.612	12.0551	12.5936	11.7169	11.6566	11.3648	10.952	10.597	11.7249	11.5563	11.7503	11.9702	11.7542	12.3139	Homo sapiens	1165	>sp|P52732|KIF11_HUMAN Kinesin-like protein KIF11 OS=Homo sapiens GN=KIF11 PE=1 SV=2	KIF11	119158.99	P52732	P52732	3	0
12.6798	13.062	13.2429	12.9459	13.4079	13.3881	13.3743	13.292	13.2251	13.9109	14.3204	13.9041	13.7455	13.5116	13.712	13.8007	13.912	13.9845	Homo sapiens	1166	>sp|P52758|UK114_HUMAN Ribonuclease UK114 OS=Homo sapiens GN=HRSP12 PE=1 SV=1	HRSP12	14493.67	P52758	P52758	4	0
15.2305	15.2546	15.1923	15.2801	15.5823	15.059	15.6014	15.4049	15.4637	15.4584	16.0006	15.9538	15.5955	15.8729	15.5816	15.5318	15.5711	15.4797	Homo sapiens	1167	>sp|P52788|SPSY_HUMAN Spermine synthase OS=Homo sapiens GN=SMS PE=1 SV=2	SMS	41268.2	P52788	P52788	7	0
12.3708	12.1954	12.8905	12.5614	12.1722	11.983	12.203	12.048	12.6009	12.7638	12.7809	12.3773	12.4245	12.1593	12.2	11.7854	11.6272	12.1932	Homo sapiens	1168	>sp|P52789|HXK2_HUMAN Hexokinase-2 OS=Homo sapiens GN=HK2 PE=1 SV=2	HK2	102379.8	P52789	P52789	13	0
12.1596	11.8907	12.4185	12.1064	11.9983	12.2987	12.0935	12.0929	11.7148	12.0412	11.5752	11.5107	11.498	11.8439	11.5578	11.5018	10.8392	11.5812	Homo sapiens	1169	>sp|P52888|THOP1_HUMAN Thimet oligopeptidase OS=Homo sapiens GN=THOP1 PE=1 SV=2	THOP1	78839.76	P52888	P52888	8	0
12.7714	12.7343	12.8266	12.9683	13.2005	12.8157	13.4167	13.1185	12.9973	11.1803	10.7515	12.3725	13.418	13.1681	12.7621	13.4768	13.3621	12.5438	Homo sapiens	1170	>sp|P52895|AK1C2_HUMAN Aldo-keto reductase family 1 member C2 OS=Homo sapiens GN=AKR1C2 PE=1 SV=3	AKR1C2	36735.29	P52895	P52895	3	0
15.4242	15.6332	15.6602	15.26	15.5719	15.3763	15.0085	15.5198	15.2732	14.9266	14.8827	14.9396	14.6739	15.23	15.0336	14.7443	14.8143	14.6627	Homo sapiens	1171	>sp|P52907|CAZA1_HUMAN F-actin-capping protein subunit alpha-1 OS=Homo sapiens GN=CAPZA1 PE=1 SV=3	CAPZA1	32922.77	P52907	P52907	11	0
7.33814	7.49334	6.92364	9.41626	9.34457	13.0497	9.45553	9.29432	9.32727	14.1677	7.69316	9.57715	11.2301	9.50145	9.6739	11.3013	10.7751	13.0834	Homo sapiens	1172	>sp|P52926|HMGA2_HUMAN High mobility group protein HMGI-C OS=Homo sapiens GN=HMGA2 PE=1 SV=1	HMGA2	11832.05	P52926	P52926	5	0
16.2296	16.2254	16.1365	16.1932	16.3388	16.2179	16.2088	16.3328	16.3318	16.2292	16.2995	16.2594	15.8393	16.3313	16.3555	16.2683	16.4587	16.0982	Homo sapiens	1173	>sp|P52943|CRIP2_HUMAN Cysteine-rich protein 2 OS=Homo sapiens GN=CRIP2 PE=1 SV=1	CRIP2	22492.71	P52943	P52943	5	0
13.4976	13.3285	13.085	13.1228	12.4956	13.0051	12.9878	12.4021	13.1815	12.5649	12.7195	12.572	12.2736	12.7288	12.2099	12.1259	11.8294	12.3391	Homo sapiens	1174	>sp|P52948|NUP98_HUMAN Nuclear pore complex protein Nup98-Nup96 OS=Homo sapiens GN=NUP98 PE=1 SV=4	NUP98	197579.35	P52948	P52948	13	0
14.007	14.2239	14.4443	13.9783	14.4954	14.3076	14.4693	14.2718	14.1325	15.2889	15.7206	15.1118	15.1839	14.9552	15.2585	14.8279	14.868	15.0519	Homo sapiens	1175	>sp|P53004|BIEA_HUMAN Biliverdin reductase A OS=Homo sapiens GN=BLVRA PE=1 SV=2	BLVRA	33428.49	P53004	P53004	18	0
13.1393	14.0033	14.2923	13.7114	12.6019	13.4409	12.4392	14.0388	13.75	11.4354	12.43	14.6577	12.5715	13.0099	11.3251	12.0866	11.429	10.4985	Homo sapiens	1176	>sp|P53007|TXTP_HUMAN Tricarboxylate transport protein, mitochondrial OS=Homo sapiens GN=SLC25A1 PE=1 SV=2	SLC25A1	34012.69	P53007	P53007	1	0.00254696
13.5463	13.9395	13.6068	14.0161	14.2913	13.7592	13.9851	13.8385	13.8504	14.0578	14.1359	14.4723	15.0356	14.5417	14.4345	14.526	14.5491	14.5163	Homo sapiens	1177	>sp|P53041|PPP5_HUMAN Serine/threonine-protein phosphatase 5 OS=Homo sapiens GN=PPP5C PE=1 SV=1	PPP5C	56878.64	P53041	P53041	10	0
13.8204	13.7551	13.4535	14.3514	14.2679	14.5113	14.3041	14.7506	14.3168	13.8129	14.368	14.2957	14.2402	13.584	14.2316	13.6895	13.8819	13.261	Homo sapiens	1178	>sp|P53367|ARFP1_HUMAN Arfaptin-1 OS=Homo sapiens GN=ARFIP1 PE=1 SV=2	ARFIP1	41738.27	P53367	P53367	6	0
7.27507	7.49079	7.22705	6.73925	7.04433	7.8893	6.39683	9.32093	6.38967	6.31171	9.87573	9.41589	10.6432	8.31824	9.0069	9.86545	8.93916	8.55397	Homo sapiens	1179	>sp|P53384|NUBP1_HUMAN Cytosolic Fe-S cluster assembly factor NUBP1 OS=Homo sapiens GN=NUBP1 PE=1 SV=2	NUBP1	34534.49	P53384	P53384	1	0
17.8907	18.0653	17.7753	18.2045	18.2727	17.8507	17.9149	18.0431	18.5292	16.5924	16.3024	16.2919	16.8494	17.3844	17.1812	16.5417	16.5589	16.6415	Homo sapiens	1180	>sp|P53396|ACLY_HUMAN ATP-citrate synthase OS=Homo sapiens GN=ACLY PE=1 SV=3	ACLY	120839.22	P53396	P53396	62	0
13.25	13.0673	13.2767	12.9472	13.0965	13.2238	13.3508	13.1758	12.81	13.5219	13.6228	13.4713	13.7553	13.1475	13.5569	13.8497	13.8214	13.831	Homo sapiens	1181	>sp|P53582|MAP11_HUMAN Methionine aminopeptidase 1 OS=Homo sapiens GN=METAP1 PE=1 SV=2	METAP1	43215.18	P53582	P53582	9	0
16.0498	16.1559	15.8693	16.1066	16.1199	15.7762	16.0336	15.9193	16.1404	16.4179	16.1515	16.207	15.7189	16.1417	15.9742	15.6737	15.6704	15.7059	Homo sapiens	1182	>sp|P53597|SUCA_HUMAN Succinyl-CoA ligase [ADP/GDP-forming] subunit alpha, mitochondrial OS=Homo sapiens GN=SUCLG1 PE=1 SV=4	SUCLG1	36249.73	P53597	P53597	10	0
11.9577	12.7371	13.1596	13.519	14.5773	14.4518	14.241	14.0493	14.5248	13.0941	14.3897	13.7972	14.9605	15.3072	15.3054	15.6106	15.499	15.328	Homo sapiens	1183	>sp|P53602|MVD1_HUMAN Diphosphomevalonate decarboxylase OS=Homo sapiens GN=MVD PE=1 SV=1	MVD	43404.58	P53602	P53602	7	0
15.542	15.3407	15.2884	15.5196	15.4458	15.233	15.1596	15.0957	15.5501	14.9184	14.6467	14.636	14.9221	15.1782	14.8636	14.8264	14.6809	15.0868	Homo sapiens	1184	>sp|P53618|COPB_HUMAN Coatomer subunit beta OS=Homo sapiens GN=COPB1 PE=1 SV=3	COPB1	107142.22	P53618	P53618	33	0
16.1872	16.2336	15.982	16.2184	16.1732	15.7845	15.7787	15.9677	16.3457	14.6402	14.444	14.0967	14.4747	15.0465	15.1112	14.6326	14.4504	14.6362	Homo sapiens	1185	>sp|P53621|COPA_HUMAN Coatomer subunit alpha OS=Homo sapiens GN=COPA PE=1 SV=2	COPA	138345.76	P53621	P53621	40	0
12.857	13.1829	12.9217	13.0918	13.0567	12.9305	12.7249	13.1475	13.2345	11.8579	11.862	11.2293	11.848	12.4189	12.997	11.6869	11.5609	11.391	Homo sapiens	1186	>sp|P53680|AP2S1_HUMAN AP-2 complex subunit sigma OS=Homo sapiens GN=AP2S1 PE=1 SV=2	AP2S1	17017.7	P53680	P53680	4	0
12.1803	12.3584	12.4152	12.3457	12.568	12.1398	12.948	11.9385	12.6005	12.7731	13.433	13.2609	13.2999	13.1702	13.1897	13.511	13.5919	13.439	Homo sapiens	1187	>sp|P53701|CCHL_HUMAN Cytochrome c-type heme lyase OS=Homo sapiens GN=HCCS PE=1 SV=1	HCCS	30601.57	P53701	P53701	7	0
16.9465	16.9727	16.8375	17.1561	17.2596	16.9866	17.7649	17.0392	17.6756	17.5082	18.1546	17.5367	18.4048	18.2131	17.6991	17.712	18.3406	18.9308	Homo sapiens	1188	>sp|P53814|SMTN_HUMAN Smoothelin OS=Homo sapiens GN=SMTN PE=1 SV=7	SMTN	99058.66	P53814	P53814	2	0.000342818
14.1416	14.2833	14.2011	14.3528	14.626	14.6964	14.3715	14.7074	14.3357	14.3008	14.5404	14.8094	15.1039	14.9468	15.0147	15.1006	15.3506	14.8475	Homo sapiens	1189	>sp|P53990|IST1_HUMAN IST1 homolog OS=Homo sapiens GN=IST1 PE=1 SV=1	IST1	39750.51	P53990	P53990	4	0
13.3298	13.3528	13.159	13.3943	13.2787	12.9485	13.1977	12.978	13.4442	12.1979	11.6596	12.2837	11.7763	12.2593	12.1313	11.7907	11.7202	11.2871	Homo sapiens	1190	>sp|P53992|SC24C_HUMAN Protein transport protein Sec24C OS=Homo sapiens GN=SEC24C PE=1 SV=3	SEC24C	118324.73	P53992	P53992	7	0
14.7237	14.7006	14.4659	15.0781	14.8752	14.5912	14.8041	14.6726	14.966	13.7386	14.4192	14.5346	14.7778	14.6336	14.8218	15.3331	15.3784	14.784	Homo sapiens	1191	>sp|P53999|TCP4_HUMAN Activated RNA polymerase II transcriptional coactivator p15 OS=Homo sapiens GN=SUB1 PE=1 SV=3	SUB1	14395.33	P53999	P53999	8	0
7.37557	9.43498	7.47636	12.6156	8.214	9.43001	12.1933	9.20178	8.31578	10.29	9.18612	8.07838	11.5034	12.8301	13.0876	11.9272	8.27697	10.8409	Homo sapiens	1192	>sp|P54105|ICLN_HUMAN Methylosome subunit pICln OS=Homo sapiens GN=CLNS1A PE=1 SV=1	CLNS1A	26215.31	P54105	P54105	2	0.000342818
16.1478	16.2683	16.0741	16.2323	16.0763	15.9409	15.8692	16.0822	16.0928	15.1364	15.0538	15.1241	14.9495	15.3474	15.1792	14.9312	14.8535	14.8326	Homo sapiens	1193	>sp|P54136|SYRC_HUMAN Arginine--tRNA ligase, cytoplasmic OS=Homo sapiens GN=RARS PE=1 SV=2	RARS	75378.98	P54136	P54136	30	0
15.5285	15.6439	15.5522	15.5651	15.6437	15.7444	15.6077	15.7087	15.7164	15.3745	15.4809	15.7028	15.5884	15.7699	15.626	15.5827	15.4809	15.3098	Homo sapiens	1194	>sp|P54577|SYYC_HUMAN Tyrosine--tRNA ligase, cytoplasmic OS=Homo sapiens GN=YARS PE=1 SV=4	YARS	59143.47	P54577	P54577	28	0
15.2065	14.8805	15.072	15.4686	15.1132	15.6655	15.4947	15.1257	15.0259	16.2659	16.3662	16.3949	16.4683	15.7408	16.0694	16.1101	16.1359	16.0793	Homo sapiens	1195	>sp|P54578|UBP14_HUMAN Ubiquitin carboxyl-terminal hydrolase 14 OS=Homo sapiens GN=USP14 PE=1 SV=3	USP14	56069.07	P54578	P54578	24	0
7.94918	7.47783	6.62016	8.42321	8.53939	6.02168	8.1394	7.8842	6.29249	7.6315	5.72157	6.44078	6.69368	7.42049	8.09517	6.90596	6.2547	5.778	Homo sapiens	1196	>sp|P54646|AAPK2_HUMAN 5'-AMP-activated protein kinase catalytic subunit alpha-2 OS=Homo sapiens GN=PRKAA2 PE=1 SV=2;>sp|Q13131|AAPK1_HUMAN 5'-AMP-activated protein kinase catalytic subunit alpha-1 OS=Homo sapiens GN=PRKAA1 PE=1 SV=4	PRKAA2;PRKAA1	62319.6;64009.22	P54646;Q13131	P54646;Q13131	1	0
13.6007	13.9303	13.8829	14.1264	14.2788	13.7463	13.8128	13.7282	13.9083	13.9495	14.8272	14.3872	15.4058	15.4687	14.7841	14.3303	14.4572	15.0481	Homo sapiens	1197	>sp|P54652|HSP72_HUMAN Heat shock-related 70 kDa protein 2 OS=Homo sapiens GN=HSPA2 PE=1 SV=1	HSPA2	70020.97	P54652	P54652	6	0
13.0758	13.0649	12.8863	13.2741	12.9778	13.683	12.8306	13.228	13.7369	12.2472	12.6097	13.2159	13.103	12.9013	12.6479	12.7689	13.0754	12.4891	Homo sapiens	1198	>sp|P54687|BCAT1_HUMAN Branched-chain-amino-acid aminotransferase, cytosolic OS=Homo sapiens GN=BCAT1 PE=1 SV=3	BCAT1	42966.15	P54687	P54687	3	0
12.8728	13.0693	12.8405	13.4011	13.2422	13.3577	13.7432	13.6743	13.525	12.9807	13.0837	12.9184	14.3019	14.0113	14.1792	14.03	13.9789	14.0956	Homo sapiens	1199	>sp|P54709|AT1B3_HUMAN Sodium/potassium-transporting ATPase subunit beta-3 OS=Homo sapiens GN=ATP1B3 PE=1 SV=1	ATP1B3	31512.58	P54709	P54709	5	0
11.9995	11.9647	12.5506	12.3157	12.008	12.6283	12.2707	12.7152	12.0706	12.6312	12.8646	12.8879	12.3781	11.9292	12.2018	12.8836	13.3238	12.9155	Homo sapiens	1200	>sp|P54725|RD23A_HUMAN UV excision repair protein RAD23 homolog A OS=Homo sapiens GN=RAD23A PE=1 SV=1	RAD23A	39609.2	P54725	P54725	3	0
16.4936	16.5674	16.7188	16.4419	16.7554	16.7857	16.7084	16.8459	16.7615	17.1965	17.5115	17.4211	17.1163	16.7381	17.1153	17.2048	17.4033	17.0489	Homo sapiens	1201	>sp|P54727|RD23B_HUMAN UV excision repair protein RAD23 homolog B OS=Homo sapiens GN=RAD23B PE=1 SV=1	RAD23B	43171.18	P54727	P54727	16	0
16.1241	16.1547	16.4203	16.0974	16.3815	16.5395	16.4738	16.4615	16.2827	17.0912	17.0853	16.8848	16.6196	16.3347	16.8252	17.1515	17.2261	17.0442	Homo sapiens	1202	>sp|P54819|KAD2_HUMAN Adenylate kinase 2, mitochondrial OS=Homo sapiens GN=AK2 PE=1 SV=2	AK2	26477.74	P54819	P54819	10	0
14.8778	14.8277	14.5784	14.9139	14.712	14.6603	14.7751	14.7635	14.8417	14.7088	14.1258	13.7272	14.1474	14.5323	14.5111	14.1413	14.1108	14.6449	Homo sapiens	1203	>sp|P54886|P5CS_HUMAN Delta-1-pyrroline-5-carboxylate synthase OS=Homo sapiens GN=ALDH18A1 PE=1 SV=2	ALDH18A1	87302.29	P54886	P54886	18	0
13.0588	13.5526	13.8909	13.5188	14.2252	14.3261	13.9124	14.0468	13.8115	14.3999	14.4535	14.3565	14.9056	14.5555	14.8378	14.6319	14.4406	14.4992	Homo sapiens	1204	>sp|P54920|SNAA_HUMAN Alpha-soluble NSF attachment protein OS=Homo sapiens GN=NAPA PE=1 SV=3	NAPA	33232.72	P54920	P54920	8	0
14.7427	14.8442	14.8351	14.8847	15.0966	15.0066	15.0257	14.9976	14.8721	15.0244	15.1521	15.2365	15.6226	15.4471	15.4131	15.9495	15.8384	15.8675	Homo sapiens	1205	>sp|P55010|IF5_HUMAN Eukaryotic translation initiation factor 5 OS=Homo sapiens GN=EIF5 PE=1 SV=2	EIF5	49222.72	P55010	P55010	18	0
14.9731	14.9275	14.9793	14.9375	15.2357	15.1141	15.1223	15.1324	15.1265	15.3766	15.8385	15.7065	15.5862	15.7763	15.6904	15.8102	15.9943	15.7941	Homo sapiens	1206	>sp|P55036|PSMD4_HUMAN 26S proteasome non-ATPase regulatory subunit 4 OS=Homo sapiens GN=PSMD4 PE=1 SV=1	PSMD4	40736.65	P55036	P55036	11	0
14.4679	14.5506	14.5358	14.5835	14.647	14.3539	14.2752	14.7222	14.2945	14.9374	14.8636	15.0335	15.4288	15.4075	15.08	15.1118	15.1699	15.3459	Homo sapiens	1207	>sp|P55039|DRG2_HUMAN Developmentally-regulated GTP-binding protein 2 OS=Homo sapiens GN=DRG2 PE=1 SV=1	DRG2	40746.43	P55039	P55039	6	0
16.9965	17.0749	16.8944	16.9088	16.9776	16.8286	16.8072	16.9216	17.073	16.6403	16.609	16.3669	16.4775	16.8847	16.7058	16.596	16.6321	16.8471	Homo sapiens	1208	>sp|P55060|XPO2_HUMAN Exportin-2 OS=Homo sapiens GN=CSE1L PE=1 SV=3	CSE1L	110416.61	P55060	P55060	36	0
17.83	18.0445	18.1586	17.828	18.2086	18.1728	18.1413	18.1691	18.1928	18.16	18.3913	17.9948	18.1422	18.1196	18.255	18.2349	18.4297	18.4891	Homo sapiens	1209	>sp|P55072|TERA_HUMAN Transitional endoplasmic reticulum ATPase OS=Homo sapiens GN=VCP PE=1 SV=4	VCP	89321.8	P55072	P55072	45	0
11.831	11.7439	11.3702	11.3339	11.3953	11.0019	11.1405	11.4708	12.1019	11.3678	11.2684	12.0822	10.776	10.9893	12.2511	12.0748	11.0113	9.4105	Homo sapiens	1210	>sp|P55081|MFAP1_HUMAN Microfibrillar-associated protein 1 OS=Homo sapiens GN=MFAP1 PE=1 SV=2	MFAP1	51958.44	P55081	P55081	1	0
18.0977	18.4237	18.1039	18.1568	18.1517	17.7952	17.9132	18.1035	18.2299	17.3736	16.9862	16.9859	16.9729	17.4634	17.2832	16.8595	16.7815	16.9495	Homo sapiens	1211	>sp|P55084|ECHB_HUMAN Trifunctional enzyme subunit beta, mitochondrial OS=Homo sapiens GN=HADHB PE=1 SV=3	HADHB	51294.44	P55084	P55084	20	0
14.343	14.2119	14.3929	14.544	14.825	14.8647	14.8994	14.6771	14.6579	15.0669	15.4202	15.0641	15.199	14.8857	14.9625	15.3598	15.4963	15.6873	Homo sapiens	1212	>sp|P55145|MANF_HUMAN Mesencephalic astrocyte-derived neurotrophic factor OS=Homo sapiens GN=MANF PE=1 SV=3	MANF	20700.13	P55145	P55145	10	0
13.114	13.2265	13.4202	13.5042	13.2021	13.6424	13.2655	13.4819	13.1419	12.7164	12.9556	13.0201	13.0995	12.5119	12.9072	13.2463	13.1198	12.8975	Homo sapiens	1213	>sp|P55196|AFAD_HUMAN Afadin OS=Homo sapiens GN=MLLT4 PE=1 SV=3	MLLT4	206804.23	P55196	P55196	6	0
13.7754	13.6036	13.5739	13.8964	13.8669	13.8321	13.3474	13.7432	13.7452	13.8278	14.1828	13.6249	14.1905	14.4807	14.6793	14.5103	14.5334	14.5586	Homo sapiens	1214	>sp|P55209|NP1L1_HUMAN Nucleosome assembly protein 1-like 1 OS=Homo sapiens GN=NAP1L1 PE=1 SV=1	NAP1L1	45374.15	P55209	P55209	15	0
11.1872	10.9564	10.3575	11.1899	11.2368	10.777	10.7476	10.7574	11.0097	11.4349	11.4101	11.6756	11.3868	11.768	10.5797	11.724	10.5783	11.8957	Homo sapiens	1215	>sp|P55212|CASP6_HUMAN Caspase-6 OS=Homo sapiens GN=CASP6 PE=1 SV=2	CASP6	33309.96	P55212	P55212	1	0
12.0459	7.78843	11.9067	11.3794	10.5883	11.9064	11.8378	11.5771	11.9903	13.0668	13.4473	12.7519	13.3503	12.9775	13.1893	12.2035	12.125	12.6441	Homo sapiens	1216	>sp|P55263|ADK_HUMAN Adenosine kinase OS=Homo sapiens GN=ADK PE=1 SV=2	ADK	40545.43	P55263	P55263	3	0
10.8981	10.1814	11.4157	10.4886	10.0808	9.70729	7.9507	9.39573	11.0921	9.81713	9.09514	7.74343	9.3283	9.83523	8.80487	7.28334	7.95489	10.1087	Homo sapiens	1217	>sp|P55265|DSRAD_HUMAN Double-stranded RNA-specific adenosine deaminase OS=Homo sapiens GN=ADAR PE=1 SV=4	ADAR	136066.37	P55265	P55265	1	0
8.95551	8.62832	8.73472	7.93699	8.23001	7.84574	8.39016	8.24689	7.68938	9.34483	9.46488	8.42851	6.7712	7.75547	8.50188	7.8229	7.30362	7.30106	Homo sapiens	1218	>sp|P55285|CADH6_HUMAN Cadherin-6 OS=Homo sapiens GN=CDH6 PE=1 SV=1	CDH6	88308.64	P55285	P55285	1	0
13.3375	13.078	12.844	13.4365	13.35	13.1571	13.2696	12.8921	13.4201	13.4087	13.2149	12.8595	13.1407	13.7178	13.184	13.242	13.1143	13.8757	Homo sapiens	1219	>sp|P55735|SEC13_HUMAN Protein SEC13 homolog OS=Homo sapiens GN=SEC13 PE=1 SV=3	SEC13	35540.51	P55735	P55735	10	0
9.71328	10.4346	9.89221	9.99252	10.1284	9.64788	9.64404	9.66341	9.21808	10.7694	10.7402	10.3106	11.0692	10.1562	9.93125	8.4558	8.50168	9.60444	Homo sapiens	1220	>sp|P55769|NH2L1_HUMAN NHP2-like protein 1 OS=Homo sapiens GN=SNU13 PE=1 SV=3	SNU13	14173.54	P55769	P55769	4	0
17.4934	17.5599	17.3812	17.5391	17.4533	17.1584	17.0881	17.3523	17.5318	17.2251	16.9045	16.9492	16.97	17.5038	17.2648	16.7624	16.6409	16.7894	Homo sapiens	1221	>sp|P55786|PSA_HUMAN Puromycin-sensitive aminopeptidase OS=Homo sapiens GN=NPEPPS PE=1 SV=2	NPEPPS	103276.31	P55786	P55786	44	0
14.101	13.7745	14.9099	15.537	13.5554	13.1092	14.5277	13.0408	10.7682	14.4177	13.7208	14.561	16.4702	15.7673	15.4148	14.5513	14.4695	14.7225	Homo sapiens	1222	>sp|P55795|HNRH2_HUMAN Heterogeneous nuclear ribonucleoprotein H2 OS=Homo sapiens GN=HNRNPH2 PE=1 SV=1	HNRNPH2	49263.57	P55795	P55795	4	0
15.6936	15.651	15.426	15.7466	15.5722	15.1526	15.2091	15.5185	15.5326	13.9025	13.8108	13.6863	13.9436	14.3424	14.3581	14.0981	13.8379	13.9232	Homo sapiens	1223	>sp|P55884|EIF3B_HUMAN Eukaryotic translation initiation factor 3 subunit B OS=Homo sapiens GN=EIF3B PE=1 SV=3	EIF3B	92481.61	P55884	P55884	30	0
12.9661	12.5306	12.8434	12.9733	12.6788	12.9715	12.8571	12.5814	12.5724	11.2746	11.7102	12.7184	13.442	12.1543	12.2058	13.3351	13.2346	12.6511	Homo sapiens	1224	>sp|P55957|BID_HUMAN BH3-interacting domain death agonist OS=Homo sapiens GN=BID PE=1 SV=1	BID	21994.69	P55957	P55957	1	0
14.6298	14.7269	14.8284	14.6763	14.7173	14.5026	14.4199	14.668	14.5806	14.094	13.6702	13.8222	14.0953	14.5341	14.3853	13.9271	13.7515	13.8286	Homo sapiens	1225	>sp|P56192|SYMC_HUMAN Methionine--tRNA ligase, cytoplasmic OS=Homo sapiens GN=MARS PE=1 SV=2	MARS	101115.79	P56192	P56192	18	0
10.7466	10.4501	9.89113	14.4242	13.788	10.5291	16.6208	11.8626	12.1416	12.6461	11.7938	12.9927	11.8439	13.0489	16.4771	20.6627	19.4053	15.2306	Homo sapiens	1226	>sp|P56211|ARP19_HUMAN cAMP-regulated phosphoprotein 19 OS=Homo sapiens GN=ARPP19 PE=1 SV=2	ARPP19	12322.97	P56211	P56211	2	0.000674992
11.5459	12.0944	12.0286	11.4533	12.4476	12.311	11.5398	12.4713	12.1605	12.2322	11.7526	12.035	11.3725	12.0977	11.716	10.996	10.9439	10.9464	Homo sapiens	1227	>sp|P56378|68MP_HUMAN 6.8 kDa mitochondrial proteolipid OS=Homo sapiens GN=MP68 PE=1 SV=1	MP68	6662.04	P56378	P56378	1	0
15.1588	15.1227	15.405	14.6739	14.8099	14.8912	14.6269	15.191	14.7827	15.3726	15.5892	15.6608	15.0861	15.4025	15.0832	14.8964	15.0701	14.9644	Homo sapiens	1228	>sp|P56381|ATP5E_HUMAN ATP synthase subunit epsilon, mitochondrial OS=Homo sapiens GN=ATP5E PE=1 SV=2;>sp|Q5VTU8|AT5EL_HUMAN ATP synthase subunit epsilon-like protein, mitochondrial OS=Homo sapiens GN=ATP5EP2 PE=3 SV=1	ATP5E;ATP5EP2	5779.76;5806.87	P56381;Q5VTU8	P56381;Q5VTU8	3	0.000674992
13.3257	13.5622	13.4906	13.487	13.4997	13.6722	13.9405	13.6329	13.9209	13.8679	14.1329	14.1469	14.0411	13.9298	13.766	14.0488	14.2006	14.1977	Homo sapiens	1229	>sp|P56537|IF6_HUMAN Eukaryotic translation initiation factor 6 OS=Homo sapiens GN=EIF6 PE=1 SV=1	EIF6	26599.07	P56537	P56537	3	0
14.6011	14.8564	15.0155	14.7085	14.97	15.0377	14.0959	15.1953	15.0257	15.4814	16.0956	15.4468	15.6063	15.649	15.7639	15.6636	15.6745	15.8744	Homo sapiens	1230	>sp|P56545|CTBP2_HUMAN C-terminal-binding protein 2 OS=Homo sapiens GN=CTBP2 PE=1 SV=1	CTBP2	48944.86	P56545	P56545	6	0
11.9759	11.8103	11.022	11.6022	12.0677	12.1478	10.85	10.8421	12.0708	10.9727	10.2802	10.8746	11.2181	11.6854	12.0257	11.1526	11.102	10.3052	Homo sapiens	1231	>sp|P56937|DHB7_HUMAN 3-keto-steroid reductase OS=Homo sapiens GN=HSD17B7 PE=1 SV=1	HSD17B7	38206.19	P56937	P56937	2	0
12.2996	12.0983	11.3387	13.1424	13.5051	12.4332	13.32	12.7704	12.7602	10.69	11.739	11.9233	12.6754	11.7142	11.9783	13.3578	13.4223	12.8977	Homo sapiens	1232	>sp|P56945|BCAR1_HUMAN Breast cancer anti-estrogen resistance protein 1 OS=Homo sapiens GN=BCAR1 PE=1 SV=2	BCAR1	93371.87	P56945	P56945	4	0
12.9255	12.8028	13.1303	13.3345	12.5247	12.1362	12.0872	12.3397	12.6168	12.6613	12.424	12.0885	11.7636	12.6971	11.991	12.3228	11.9627	12.8363	Homo sapiens	1233	>sp|P57088|TMM33_HUMAN Transmembrane protein 33 OS=Homo sapiens GN=TMEM33 PE=1 SV=2	TMEM33	27978.15	P57088	P57088	6	0
8.4343	8.67119	8.03377	9.00694	7.72195	7.67798	8.60408	8.31799	6.11232	9.16393	8.05165	8.19998	7.75108	9.38975	8.55256	8.76753	7.21752	8.41819	Homo sapiens	1234	>sp|P57721|PCBP3_HUMAN Poly(rC)-binding protein 3 OS=Homo sapiens GN=PCBP3 PE=2 SV=2	PCBP3	39465.25	P57721	P57721	2	0.000342818
6.0161	8.09004	8.80696	8.0614	8.38291	7.73345	8.50428	5.87017	7.74852	4.26954	8.27013	6.94564	7.39755	6.71806	7.3791	7.29268	5.7478	5.52315	Homo sapiens	1235	>sp|P57739|CLD2_HUMAN Claudin-2 OS=Homo sapiens GN=CLDN2 PE=1 SV=1	CLDN2	24548.71	P57739	P57739	1	0
11.8865	9.16087	11.4987	11.2185	9.67715	10.188	10.972	11.1798	9.8922	11.1012	10.4701	7.66926	10.5433	10.7581	11.7028	9.96309	8.58653	11.3391	Homo sapiens	1236	>sp|P57740|NU107_HUMAN Nuclear pore complex protein Nup107 OS=Homo sapiens GN=NUP107 PE=1 SV=1	NUP107	106374.09	P57740	P57740	4	0
10.1742	10.1898	9.25892	10.6248	7.91569	9.70808	9.22465	9.81288	10.0737	9.31306	9.07446	9.15827	10.1295	10.0108	9.99465	9.57196	8.79206	9.29299	Homo sapiens	1237	>sp|P57772|SELB_HUMAN Selenocysteine-specific elongation factor OS=Homo sapiens GN=EEFSEC PE=1 SV=4	EEFSEC	65304.68	P57772	P57772	4	0
16.6178	17.0358	17.3749	16.5006	14.9924	16.8025	14.9397	16.3676	15.8771	14.7591	14.7318	14.1476	14.5147	14.6705	14.1448	11.3465	11.3318	12.3849	Homo sapiens	1238	>sp|P58107|EPIPL_HUMAN Epiplakin OS=Homo sapiens GN=EPPK1 PE=1 SV=2	EPPK1	555620.95	P58107	P58107	1	0.000342818
12.9637	12.7301	12.2091	14.088	13.7274	13.5355	12.8031	13.0736	11.3839	8.59044	5.9902	12.4509	8.51026	14.2455	10.8726	12.21	12.4561	7.67773	Homo sapiens	1239	>sp|P58340|MLF1_HUMAN Myeloid leukemia factor 1 OS=Homo sapiens GN=MLF1 PE=1 SV=1	MLF1	30627.14	P58340	P58340	2	0
15.4529	15.355	15.3825	15.5987	15.1055	15.2925	15.3495	15.2637	15.5832	14.7298	14.2177	14.3489	14.855	14.8104	14.9042	14.3584	14.4109	14.438	Homo sapiens	1240	>sp|P59998|ARPC4_HUMAN Actin-related protein 2/3 complex subunit 4 OS=Homo sapiens GN=ARPC4 PE=1 SV=3	ARPC4	19667.01	P59998	P59998	11	0
11.2317	11.3134	10.9574	11.8997	10.8145	10.8132	11.5523	11.1671	11.9651	11.3996	11.1435	10.8892	11.2981	12.171	11.2859	11.6202	11.3447	12.3135	Homo sapiens	1241	>sp|P60059|SC61G_HUMAN Protein transport protein Sec61 subunit gamma OS=Homo sapiens GN=SEC61G PE=1 SV=1	SEC61G	7741.32	P60059	P60059	2	0
18.5547	18.6791	18.9142	18.6917	19.0582	18.9875	19.0649	19.0111	19.1251	19.941	20.2187	19.8978	20.1171	19.8215	20.0756	19.9178	20.1818	20.1256	Homo sapiens	1242	>sp|P60174|TPIS_HUMAN Triosephosphate isomerase OS=Homo sapiens GN=TPI1 PE=1 SV=3	TPI1	30790.99	P60174	P60174	25	0
16.4421	16.3995	16.2022	16.4883	16.278	16.0576	15.9574	16.1291	16.3853	15.0722	14.6261	14.6531	14.5506	14.9978	14.9138	14.8015	14.4789	14.6966	Homo sapiens	1243	>sp|P60228|EIF3E_HUMAN Eukaryotic translation initiation factor 3 subunit E OS=Homo sapiens GN=EIF3E PE=1 SV=1	EIF3E	52220.81	P60228	P60228	15	0
14.5685	14.518	14.1332	14.4583	14.1853	14.0414	14.1624	14.067	14.2227	13.732	12.0318	13.7998	13.7971	13.8515	13.7094	14.4647	14.4299	13.6444	Homo sapiens	1244	>sp|P60468|SC61B_HUMAN Protein transport protein Sec61 subunit beta OS=Homo sapiens GN=SEC61B PE=1 SV=2	SEC61B	9974.45	P60468	P60468	3	0
10.9427	10.203	11.4299	12.0494	10.0497	10.1116	11.1058	11.6647	11.3889	11.2087	10.8918	11.0253	11.2675	10.3754	11.3767	12.0582	12.0392	11.5184	Homo sapiens	1245	>sp|P60510|PP4C_HUMAN Serine/threonine-protein phosphatase 4 catalytic subunit OS=Homo sapiens GN=PPP4C PE=1 SV=1	PPP4C	35079.92	P60510	P60510	1	0
11.4633	10.7633	11.8619	11.9633	12.3895	12.69	13.1417	12.1331	12.5563	12.2767	11.9687	12.5272	13.3815	13.3038	13.1822	13.5438	13.5149	13.2852	Homo sapiens	1246	>sp|P60520|GBRL2_HUMAN Gamma-aminobutyric acid receptor-associated protein-like 2 OS=Homo sapiens GN=GABARAPL2 PE=1 SV=1	GABARAPL2	13666.83	P60520	P60520	3	0
10.3732	10.4577	10.2079	10.9273	8.88796	11.0679	8.51622	7.92225	10.0352	10.1579	9.49198	10.541	9.02828	9.13118	9.49344	9.03581	9.89536	8.33585	Homo sapiens	1247	>sp|P60604|UB2G2_HUMAN Ubiquitin-conjugating enzyme E2 G2 OS=Homo sapiens GN=UBE2G2 PE=1 SV=1	UBE2G2	18566.31	P60604	P60604	1	0.001609788
15.9345	15.9334	15.9151	15.8576	15.585	15.7469	15.1345	15.9103	15.5722	16.0779	15.8285	15.9234	14.8521	15.4233	15.5156	15.7999	15.5622	15.333	Homo sapiens	1248	>sp|P60660|MYL6_HUMAN Myosin light polypeptide 6 OS=Homo sapiens GN=MYL6 PE=1 SV=2	MYL6	16930.05	P60660	P60660	8	0
14.441	14.9164	14.9885	14.6066	15.2493	15.2564	15.1833	15.3144	15.4531	14.9959	15.6592	15.4126	15.7036	15.6408	15.2791	15.4095	15.8113	15.9186	Homo sapiens	1249	>sp|P60673|PROF3_HUMAN Profilin-3 OS=Homo sapiens GN=PFN3 PE=2 SV=1	PFN3	14595.95	P60673	P60673	1	0
17.9435	17.9583	17.7799	17.9238	17.8331	17.7664	17.6839	17.8623	17.8892	17.0169	16.6758	16.97	16.9173	17.2994	17.01	17.2597	17.2078	17.2085	Homo sapiens	1251	>sp|P60842|IF4A1_HUMAN Eukaryotic initiation factor 4A-I OS=Homo sapiens GN=EIF4A1 PE=1 SV=1	EIF4A1	46153.93	P60842	P60842	42	0
15.4147	15.4989	15.4911	15.7142	15.4087	15.3979	15.2497	15.4406	15.4778	15.0902	14.7433	15.4967	15.0495	15.117	14.7813	15.0782	15.1622	14.8422	Homo sapiens	1252	>sp|P60866|RS20_HUMAN 40S ribosomal protein S20 OS=Homo sapiens GN=RPS20 PE=1 SV=1	RPS20	13372.71	P60866	P60866	8	0
13.5833	12.5593	12.7566	13.2495	13.2772	12.48	13.4109	13.3601	13.7848	14.2996	14.0839	13.8309	14.0484	13.0593	13.8857	14.0451	13.8215	13.9622	Homo sapiens	1253	>sp|P60891|PRPS1_HUMAN Ribose-phosphate pyrophosphokinase 1 OS=Homo sapiens GN=PRPS1 PE=1 SV=2	PRPS1	34834.23	P60891	P60891	3	0
16.1431	16.3759	16.5974	16.3792	16.664	16.8119	16.8344	16.7809	16.7855	16.5507	16.7246	16.5986	16.7485	16.3793	16.5861	16.7987	17.1191	16.9758	Homo sapiens	1254	>sp|P60900|PSA6_HUMAN Proteasome subunit alpha type-6 OS=Homo sapiens GN=PSMA6 PE=1 SV=1	PSMA6	27399.45	P60900	P60900	11	0
12.0438	11.9519	12.0479	11.8701	12.7699	12.2297	11.1961	12.4434	10.4621	12.9382	13.3873	13.4334	13.8196	13.2752	13.1416	12.8881	13.0212	13.0898	Homo sapiens	1255	>sp|P60903|S10AA_HUMAN Protein S100-A10 OS=Homo sapiens GN=S100A10 PE=1 SV=2	S100A10	11203.1	P60903	P60903	7	0
16.5891	16.5782	16.8914	16.5158	16.9028	17.1162	16.8136	17.0343	16.7905	17.2595	17.5036	17.4446	17.7668	17.6703	17.6325	17.5292	17.6554	17.6153	Homo sapiens	1256	>sp|P60953|CDC42_HUMAN Cell division control protein 42 homolog OS=Homo sapiens GN=CDC42 PE=1 SV=2	CDC42	21258.6	P60953	P60953	13	0
14.7386	14.3696	14.4952	14.5838	14.025	14.2799	14.5468	14.398	14.2695	15.5375	15.4372	15.4175	15.513	15.5933	15.4479	15.1652	15.1129	15.3142	Homo sapiens	1257	>sp|P60981|DEST_HUMAN Destrin OS=Homo sapiens GN=DSTN PE=1 SV=3	DSTN	18505.72	P60981	P60981	14	0
12.3823	11.9474	12.4344	12.4379	12.8183	12.7618	12.4414	12.308	12.3345	12.5378	12.7628	12.7847	12.8696	13.0854	12.6926	12.4444	12.7131	12.7293	Homo sapiens	1258	>sp|P60983|GMFB_HUMAN Glia maturation factor beta OS=Homo sapiens GN=GMFB PE=1 SV=2	GMFB	16713.17	P60983	P60983	4	0
15.0145	14.6547	14.4806	14.9784	14.8949	14.8778	15.2597	14.7954	15.2606	15.2503	14.6849	15.6329	15.2499	14.9605	15.3104	15.2526	14.7907	14.1511	Homo sapiens	1259	>sp|P61006|RAB8A_HUMAN Ras-related protein Rab-8A OS=Homo sapiens GN=RAB8A PE=1 SV=1	RAB8A	23668.2	P61006	P61006	9	0
13.8369	14.2646	14.2096	13.3248	13.9477	13.7694	13.442	13.8153	13.5311	13.4884	13.5651	13.6363	13.5508	14.0614	13.0798	13.2983	13.3753	13.9536	Homo sapiens	1260	>sp|P61009|SPCS3_HUMAN Signal peptidase complex subunit 3 OS=Homo sapiens GN=SPCS3 PE=1 SV=1	SPCS3	20313.4	P61009	P61009	4	0
14.1922	14.1825	14.3269	14.3954	14.6649	14.4648	14.4561	14.4816	14.5692	14.1777	14.3913	14.0334	14.309	14.0459	14.4698	14.5466	14.8628	14.6634	Homo sapiens	1261	>sp|P61011|SRP54_HUMAN Signal recognition particle 54 kDa protein OS=Homo sapiens GN=SRP54 PE=1 SV=1	SRP54	55704.71	P61011	P61011	18	0
13.3624	13.3547	13.3554	13.2807	14.1055	13.6486	14.1034	13.7277	13.3924	14.8078	15.1977	14.6365	15.0377	14.745	14.9693	14.7654	14.7714	15.0567	Homo sapiens	1262	>sp|P61019|RAB2A_HUMAN Ras-related protein Rab-2A OS=Homo sapiens GN=RAB2A PE=1 SV=1	RAB2A	23545.55	P61019	P61019	7	0
10.4657	9.93093	10.4289	11.3313	11.5097	10.8975	10.9897	10.2858	11.0246	10.5564	11.3273	11.1132	12.4268	12.1929	11.7668	11.8926	11.7277	12.1818	Homo sapiens	1263	>sp|P61020|RAB5B_HUMAN Ras-related protein Rab-5B OS=Homo sapiens GN=RAB5B PE=1 SV=1	RAB5B	23706.8	P61020	P61020	4	0
9.72239	9.18428	11.0043	9.99775	10.6808	10.9159	8.82305	9.91885	9.47504	8.7703	8.77213	9.83413	11.7341	11.2794	11.3486	12.1053	11.7277	11.0117	Homo sapiens	1264	>sp|P61024|CKS1_HUMAN Cyclin-dependent kinases regulatory subunit 1 OS=Homo sapiens GN=CKS1B PE=1 SV=1	CKS1B	9660.17	P61024	P61024	4	0
15.0801	15.2096	15.2431	15.2955	15.5744	15.416	15.3995	15.5043	15.1812	14.8354	15.4588	15.5164	15.7751	15.5989	15.4392	15.97	15.9684	15.8476	Homo sapiens	1265	>sp|P61026|RAB10_HUMAN Ras-related protein Rab-10 OS=Homo sapiens GN=RAB10 PE=1 SV=1	RAB10	22540.93	P61026	P61026	10	0
15.6826	15.7262	15.7914	16.0386	16.3744	16.3186	16.3357	16.2542	16.2264	15.9483	16.103	16.0729	16.5932	16.6172	16.6542	16.6191	16.7144	16.5705	Homo sapiens	1266	>sp|P61077|UB2D3_HUMAN Ubiquitin-conjugating enzyme E2 D3 OS=Homo sapiens GN=UBE2D3 PE=1 SV=1	UBE2D3	16687.16	P61077	P61077	2	0
14.6727	14.9909	14.9311	14.7304	15.0099	15.0559	14.6892	14.9188	14.9126	14.789	14.9602	15.0232	14.7982	14.8268	14.8132	14.6085	14.9153	14.6126	Homo sapiens	1267	>sp|P61081|UBC12_HUMAN NEDD8-conjugating enzyme Ubc12 OS=Homo sapiens GN=UBE2M PE=1 SV=1	UBE2M	20899.97	P61081	P61081	9	0
13.947	14.1167	14.2443	14.2232	14.4806	14.6497	14.5192	14.283	14.3555	14.8358	15.0308	15.1631	14.9945	14.6479	14.7432	15.115	15.2012	15.0063	Homo sapiens	1268	>sp|P61086|UBE2K_HUMAN Ubiquitin-conjugating enzyme E2 K OS=Homo sapiens GN=UBE2K PE=1 SV=3	UBE2K	22406.65	P61086	P61086	9	0
17.6475	17.6707	17.8176	17.6535	17.8708	18.0274	18.0352	18.0379	17.9805	17.8997	18.0781	18.0855	18.0456	17.9387	17.9053	18.0011	18.2823	18.1319	Homo sapiens	1269	>sp|P61088|UBE2N_HUMAN Ubiquitin-conjugating enzyme E2 N OS=Homo sapiens GN=UBE2N PE=1 SV=1	UBE2N	17137.82	P61088	P61088	10	0
16.5542	16.8148	16.8098	16.784	17.2152	17.1741	16.7779	17.1378	16.6433	17.7458	18.0733	17.8202	17.6392	17.8844	17.8886	17.9819	18.0624	17.9847	Homo sapiens	1270	>sp|P61106|RAB14_HUMAN Ras-related protein Rab-14 OS=Homo sapiens GN=RAB14 PE=1 SV=4	RAB14	23896.94	P61106	P61106	10	0
16.2884	16.2584	16.2056	16.1887	16.0956	16.0409	16.178	16.0797	16.2145	15.777	15.5467	15.742	15.8388	16.0858	15.81	15.5715	15.5545	15.6351	Homo sapiens	1271	>sp|P61158|ARP3_HUMAN Actin-related protein 3 OS=Homo sapiens GN=ACTR3 PE=1 SV=3	ACTR3	47371.17	P61158	P61158	20	0
16.4639	16.5274	16.4575	16.5721	16.3472	16.2807	16.2593	16.1847	16.5428	15.4717	15.133	14.7637	15.3275	15.691	15.9581	15.3929	15.2492	15.4108	Homo sapiens	1272	>sp|P61160|ARP2_HUMAN Actin-related protein 2 OS=Homo sapiens GN=ACTR2 PE=1 SV=1	ACTR2	44760.78	P61160	P61160	16	0
14.233	14.3108	14.2573	14.6189	14.453	14.3005	14.5844	14.2727	14.2645	13.8107	13.7248	13.5661	13.5402	13.6912	13.6373	13.6369	13.5542	13.7756	Homo sapiens	1273	>sp|P61163|ACTZ_HUMAN Alpha-centractin OS=Homo sapiens GN=ACTR1A PE=1 SV=1	ACTR1A	42613.74	P61163	P61163	5	0
14.1737	14.2173	14.4325	14.3624	14.3368	14.6412	14.5583	14.5195	14.838	14.4147	14.451	14.6151	14.5098	14.4837	14.1779	14.4681	14.561	14.6511	Homo sapiens	1274	>sp|P61201|CSN2_HUMAN COP9 signalosome complex subunit 2 OS=Homo sapiens GN=COPS2 PE=1 SV=1	COPS2	51596.68	P61201	P61201	10	0
16.4583	16.629	16.5483	16.4915	16.6421	16.9343	16.696	16.8604	16.5461	16.6412	16.8575	16.9263	17.0184	16.9189	16.8439	17.0652	17.2333	17.097	Homo sapiens	1275	>sp|P61204|ARF3_HUMAN ADP-ribosylation factor 3 OS=Homo sapiens GN=ARF3 PE=1 SV=2;>sp|P84077|ARF1_HUMAN ADP-ribosylation factor 1 OS=Homo sapiens GN=ARF1 PE=1 SV=2	ARF3;ARF1	20600.76;20696.76	P61204;P84077	P61204;P84077	9	0
15.3605	15.4668	15.3191	15.313	15.2702	14.9714	14.9471	15.2152	15.3049	14.1507	13.8156	14.1187	14.1547	14.3729	13.958	13.8322	13.8712	14.0219	Homo sapiens	1276	>sp|P61221|ABCE1_HUMAN ATP-binding cassette sub-family E member 1 OS=Homo sapiens GN=ABCE1 PE=1 SV=1	ABCE1	67314.33	P61221	P61221	21	0
15.3713	15.6321	15.6902	15.5044	15.7668	15.649	16.1276	15.6233	16.145	16.4969	16.5423	16.6249	16.6195	16.4135	16.4665	16.3003	16.504	16.3469	Homo sapiens	1277	>sp|P61224|RAP1B_HUMAN Ras-related protein Rap-1b OS=Homo sapiens GN=RAP1B PE=1 SV=1	RAP1B	20824.78	P61224	P61224	10	0
18.6269	18.712	18.6111	18.7066	18.43	18.3744	18.2955	18.3634	18.6725	17.1293	16.9053	16.9625	17.173	17.5464	17.2331	17.0457	17.0762	17.2424	Homo sapiens	1278	>sp|P61247|RS3A_HUMAN 40S ribosomal protein S3a OS=Homo sapiens GN=RPS3A PE=1 SV=2	RPS3A	29944.91	P61247	P61247	30	0
17.6235	17.7793	17.6734	17.697	17.5588	17.4078	17.3589	17.4435	17.6221	15.8484	15.5844	15.7976	15.9308	16.1774	15.8152	15.7581	15.7492	15.9114	Homo sapiens	1279	>sp|P61254|RL26_HUMAN 60S ribosomal protein L26 OS=Homo sapiens GN=RPL26 PE=1 SV=1	RPL26	17258.21	P61254	P61254	14	0
14.0615	14.0152	14.1113	14.0476	14.1636	14.056	13.9781	14.1595	13.8501	14.8342	15.0156	14.8496	14.7077	14.8389	14.6784	14.8617	14.8155	15.0088	Homo sapiens	1280	>sp|P61289|PSME3_HUMAN Proteasome activator complex subunit 3 OS=Homo sapiens GN=PSME3 PE=1 SV=1	PSME3	29506.05	P61289	P61289	11	0
18.3096	18.3046	18.1462	18.4253	18.1119	17.7739	17.9444	17.9977	18.1439	16.0769	15.6949	15.4015	15.9934	16.4379	15.9279	15.7664	15.5955	16.4531	Homo sapiens	1281	>sp|P61313|RL15_HUMAN 60S ribosomal protein L15 OS=Homo sapiens GN=RPL15 PE=1 SV=2	RPL15	24146.07	P61313	P61313	21	0
13.4741	13.8016	14.4342	13.4357	13.8187	14.5141	13.919	14.039	13.5363	14.3359	15.0173	14.6531	14.8836	14.908	14.6308	14.7174	14.9263	15.1104	Homo sapiens	1282	>sp|P61326|MGN_HUMAN Protein mago nashi homolog OS=Homo sapiens GN=MAGOH PE=1 SV=1;>sp|Q96A72|MGN2_HUMAN Protein mago nashi homolog 2 OS=Homo sapiens GN=MAGOHB PE=1 SV=1	MAGOH;MAGOHB	17163.62;17275.79	P61326;Q96A72	P61326;Q96A72	4	0
16.1468	16.0805	15.8913	16.2613	15.796	15.6988	15.901	15.828	16.0432	14.1844	13.4276	13.7982	13.6147	14.0078	14.0497	13.4625	13.4746	13.2379	Homo sapiens	1283	>sp|P61353|RL27_HUMAN 60S ribosomal protein L27 OS=Homo sapiens GN=RPL27 PE=1 SV=2	RPL27	15797.72	P61353	P61353	10	0
13.4512	13.4892	13.7433	13.496	13.4782	13.3906	13.3846	13.6323	13.4336	13.1085	13.0735	13.4599	13.0849	13.3134	13.8646	13.4108	13.1831	12.2626	Homo sapiens	1284	>sp|P61421|VA0D1_HUMAN V-type proton ATPase subunit d 1 OS=Homo sapiens GN=ATP6V0D1 PE=1 SV=1	ATP6V0D1	40329.09	P61421	P61421	6	0
10.534	11.4516	11.3347	11.1075	11.2085	10.767	10.9479	11.3245	10.6922	12.3734	13.0358	12.226	13.6682	13.8524	13.2535	11.7555	12.6114	13.1688	Homo sapiens	1285	>sp|P61457|PHS_HUMAN Pterin-4-alpha-carbinolamine dehydratase OS=Homo sapiens GN=PCBD1 PE=1 SV=2	PCBD1	11999.6	P61457	P61457	5	0
15.7017	15.8135	15.805	15.7589	15.7766	15.6992	15.3204	15.6595	15.97	13.8759	13.933	14.1637	14.5112	15.2938	14.4717	14.3197	14.5375	14.6002	Homo sapiens	1286	>sp|P61513|RL37A_HUMAN 60S ribosomal protein L37a OS=Homo sapiens GN=RPL37A PE=1 SV=2	RPL37A	10275.25	P61513	P61513	6	0
14.5675	14.9444	14.7829	15.0302	14.9451	15.1839	15.282	14.7541	15.0952	15.2442	15.2681	15.5073	15.9546	15.254	15.4573	15.4164	15.4069	15.3075	Homo sapiens	1287	>sp|P61586|RHOA_HUMAN Transforming protein RhoA OS=Homo sapiens GN=RHOA PE=1 SV=1	RHOA	21768.12	P61586	P61586	6	0
10.7519	10.392	10.8088	11.1121	9.82149	10.4557	8.59169	10.688	10.664	9.55001	8.99383	9.3405	10.3112	10.7769	9.36509	9.54431	9.47545	10.6202	Homo sapiens	1288	>sp|P61599|NAA20_HUMAN N-alpha-acetyltransferase 20 OS=Homo sapiens GN=NAA20 PE=1 SV=1	NAA20	20368.17	P61599	P61599	2	0.001609788
18.5742	18.6818	18.8288	18.619	18.9562	19.0575	19.0224	19.0346	18.9491	19.1846	19.4789	19.164	19.1098	18.8355	19.0511	19.3676	19.5964	19.5713	Homo sapiens	1289	>sp|P61604|CH10_HUMAN 10 kDa heat shock protein, mitochondrial OS=Homo sapiens GN=HSPE1 PE=1 SV=2	HSPE1	10931.69	P61604	P61604	16	0
15.8661	15.9233	15.7763	15.5999	15.3215	15.2348	15.2175	15.2554	15.2917	15.0129	14.674	14.7305	14.4252	14.8279	14.8142	14.4331	14.3951	14.3394	Homo sapiens	1290	>sp|P61619|S61A1_HUMAN Protein transport protein Sec61 subunit alpha isoform 1 OS=Homo sapiens GN=SEC61A1 PE=1 SV=2	SEC61A1	52264.73	P61619	P61619	8	0
14.4325	14.6979	14.727	14.4017	14.8312	14.8388	14.6102	14.6597	14.7697	14.8969	14.9734	15.0058	14.8911	14.8818	15.047	15.2774	15.3887	15.102	Homo sapiens	1291	>sp|P61758|PFD3_HUMAN Prefoldin subunit 3 OS=Homo sapiens GN=VBP1 PE=1 SV=3	VBP1	22657.95	P61758	P61758	9	0
12.7261	12.9881	12.2931	13.0336	13.098	13.005	13.6718	13.1196	12.8052	12.81	13.3499	12.9412	13.3782	12.4782	13.1089	13.6419	13.7083	13.6332	Homo sapiens	1292	>sp|P61769|B2MG_HUMAN Beta-2-microglobulin OS=Homo sapiens GN=B2M PE=1 SV=1	B2M	13714.56	P61769	P61769	1	0
12.6604	12.8851	12.8219	12.7665	12.4041	12.417	11.9037	11.5238	12.472	12.6672	11.713	12.0356	11.5203	12.2959	12.5827	12.3851	12.1086	11.7267	Homo sapiens	1293	>sp|P61803|DAD1_HUMAN Dolichyl-diphosphooligosaccharide--protein glycosyltransferase subunit DAD1 OS=Homo sapiens GN=DAD1 PE=1 SV=3	DAD1	12496.71	P61803	P61803	5	0
14.4604	14.6101	14.6754	14.3144	14.3974	14.8485	14.406	14.5769	14.3478	15.3627	15.5765	15.1917	15.0438	15.4384	15.6397	15.1923	15.3125	15.1317	Homo sapiens	1294	>sp|P61916|NPC2_HUMAN Epididymal secretory protein E1 OS=Homo sapiens GN=NPC2 PE=1 SV=1	NPC2	16570.2	P61916	P61916	3	0
12.2902	12.1221	11.7712	12.979	12.4341	11.8893	11.5469	11.9381	12.1119	11.1589	10.612	10.4453	10.454	10.8566	10.9079	11.3107	11.1025	11.3941	Homo sapiens	1295	>sp|P61923|COPZ1_HUMAN Coatomer subunit zeta-1 OS=Homo sapiens GN=COPZ1 PE=1 SV=1	COPZ1	20198.22	P61923	P61923	2	0
15.3442	14.5297	15.5054	15.2137	15.6642	15.0808	14.9854	14.9041	14.9789	14.146	14.2634	13.7849	14.8869	15.0326	15.0839	14.2519	14.5598	14.7014	Homo sapiens	1296	>sp|P61927|RL37_HUMAN 60S ribosomal protein L37 OS=Homo sapiens GN=RPL37 PE=1 SV=2	RPL37	11077.88	P61927	P61927	4	0
13.8631	14.0217	14.2811	14.1695	14.2333	14.6184	14.3741	14.355	14.0357	15.1006	15.3825	15.1478	14.9818	14.7537	14.9173	14.8866	15.3974	15.1861	Homo sapiens	1297	>sp|P61956|SUMO2_HUMAN Small ubiquitin-related modifier 2 OS=Homo sapiens GN=SUMO2 PE=1 SV=3	SUMO2	10871.22	P61956	P61956	4	0
13.1022	13.5089	13.401	13.3371	13.9067	14.0216	13.697	13.8396	13.8727	13.8962	14.4969	13.9841	14.0761	13.8556	14.3076	14.5566	14.79	14.544	Homo sapiens	1298	>sp|P61960|UFM1_HUMAN Ubiquitin-fold modifier 1 OS=Homo sapiens GN=UFM1 PE=1 SV=1	UFM1	9117.58	P61960	P61960	4	0
11.5983	12.2552	12.1546	11.5802	12.1004	12.2471	11.5436	12.4295	12.0545	10.326	10.7184	10.9075	10.9166	11.6839	11.9219	9.91882	10.1054	9.0052	Homo sapiens	1299	>sp|P61962|DCAF7_HUMAN DDB1- and CUL4-associated factor 7 OS=Homo sapiens GN=DCAF7 PE=1 SV=1	DCAF7	38926.17	P61962	P61962	3	0
10.3023	10.2674	10.691	10.6987	9.76999	7.7392	7.29895	7.77903	9.9127	9.39016	8.86268	9.61195	8.25788	9.47371	8.99749	9.05292	8.57383	8.19614	Homo sapiens	1300	>sp|P61966|AP1S1_HUMAN AP-1 complex subunit sigma-1A OS=Homo sapiens GN=AP1S1 PE=1 SV=1	AP1S1	18732.97	P61966	P61966	1	0
13.6795	13.7079	13.4553	13.7144	13.551	13.3195	13.2283	13.4721	12.8603	13.0328	12.9173	13.3178	12.4625	12.8589	12.7391	13.0866	12.418	12.3311	Homo sapiens	1301	>sp|P61970|NTF2_HUMAN Nuclear transport factor 2 OS=Homo sapiens GN=NUTF2 PE=1 SV=1	NUTF2	14478.48	P61970	P61970	5	0
17.615	17.7439	17.8692	17.5695	17.6039	17.7714	17.5046	17.6723	17.6051	17.268	17.3448	17.2065	17.2254	17.2195	17.4716	17.4819	17.6707	17.427	Homo sapiens	1302	>sp|P61978|HNRPK_HUMAN Heterogeneous nuclear ribonucleoprotein K OS=Homo sapiens GN=HNRNPK PE=1 SV=1	HNRNPK	50976.24	P61978	P61978	29	0
18.7881	18.8895	19.1152	18.7084	19.0549	19.1058	18.8481	19.1033	18.9321	19.1583	19.2919	19.124	18.923	18.8144	19.0237	18.9967	19.1314	19.0102	Homo sapiens	1303	>sp|P61981|1433G_HUMAN 14-3-3 protein gamma OS=Homo sapiens GN=YWHAG PE=1 SV=2	YWHAG	28302.59	P61981	P61981	17	0
12.2646	12.2969	11.0113	11.8717	11.7582	11.1583	11.8122	11.302	11.3592	11.9011	11.0661	10.8284	10.4659	11.0807	11.3469	10.7592	10.6425	10.7824	Homo sapiens	1304	>sp|P62070|RRAS2_HUMAN Ras-related protein R-Ras2 OS=Homo sapiens GN=RRAS2 PE=1 SV=1	RRAS2	23399.56	P62070	P62070	3	0
19.1128	19.3291	19.1421	19.1517	18.9613	18.7978	18.5976	18.9315	19.0462	17.9506	17.8238	17.903	17.6975	18.4963	17.874	17.8367	18.0217	18.1364	Homo sapiens	1305	>sp|P62081|RS7_HUMAN 40S ribosomal protein S7 OS=Homo sapiens GN=RPS7 PE=1 SV=1	RPS7	22126.85	P62081	P62081	18	0
14.7895	14.5741	14.6127	15.0219	14.9993	15.1376	14.8437	14.9329	14.6609	14.1096	13.6626	14.6069	14.4631	14.4896	15.0422	14.5489	14.5013	13.2385	Homo sapiens	1306	>sp|P62136|PP1A_HUMAN Serine/threonine-protein phosphatase PP1-alpha catalytic subunit OS=Homo sapiens GN=PPP1CA PE=1 SV=1	PPP1CA	37512.07	P62136	P62136	4	0
14.6985	14.8621	14.7255	14.863	14.6368	14.87	14.6774	14.9464	14.9573	14.9215	14.5469	14.7898	14.9054	15.2438	14.9281	14.562	14.4657	14.6047	Homo sapiens	1307	>sp|P62140|PP1B_HUMAN Serine/threonine-protein phosphatase PP1-beta catalytic subunit OS=Homo sapiens GN=PPP1CB PE=1 SV=3	PPP1CB	37186.83	P62140	P62140	14	0
16.4852	16.0471	16.4479	16.5236	16.1914	16.399	16.1052	16.5357	16.2437	15.9608	15.8867	15.1771	15.3265	15.6729	16.289	16.5571	16.1935	16.3326	Homo sapiens	1308	>sp|P62158|CALM_HUMAN Calmodulin OS=Homo sapiens GN=CALM1 PE=1 SV=2	CALM1	16837.58	P62158	P62158	8	0
16.4942	16.6012	16.4131	16.5533	16.5733	16.2629	16.4387	16.4202	16.7567	15.8561	15.6903	15.3668	15.7998	16.1458	16.201	15.6797	15.838	15.9371	Homo sapiens	1309	>sp|P62191|PRS4_HUMAN 26S protease regulatory subunit 4 OS=Homo sapiens GN=PSMC1 PE=1 SV=1	PSMC1	49184.51	P62191	P62191	28	0
15.0643	15.2093	15.0627	15.1869	14.9256	14.6129	14.6905	14.8948	15.107	14.7203	14.4401	14.2572	14.3227	14.7482	14.6219	14.4818	14.518	14.7364	Homo sapiens	1310	>sp|P62195|PRS8_HUMAN 26S protease regulatory subunit 8 OS=Homo sapiens GN=PSMC5 PE=1 SV=1	PSMC5	45626	P62195	P62195	20	0
15.2437	15.2089	15.0348	15.2642	14.9604	14.7928	14.4772	14.9268	15.1909	12.9547	12.4458	12.4423	12.7174	13.2686	13.3764	12.7613	12.773	12.6417	Homo sapiens	1311	>sp|P62241|RS8_HUMAN 40S ribosomal protein S8 OS=Homo sapiens GN=RPS8 PE=1 SV=2	RPS8	24205.18	P62241	P62241	17	0
17.0203	17.0968	17.0449	17.1635	16.9498	16.8418	16.3899	16.7815	17.0956	16.0539	15.6379	15.8843	15.6014	15.9871	15.7948	15.5861	15.646	15.5771	Homo sapiens	1312	>sp|P62244|RS15A_HUMAN 40S ribosomal protein S15a OS=Homo sapiens GN=RPS15A PE=1 SV=2	RPS15A	14839.5	P62244	P62244	10	0
17.7878	17.926	17.7338	17.8024	17.5783	17.4815	17.1387	17.4333	17.811	16.5287	16.2054	16.092	16.0913	16.6949	16.4386	16.0004	16.0779	16.2687	Homo sapiens	1313	>sp|P62249|RS16_HUMAN 40S ribosomal protein S16 OS=Homo sapiens GN=RPS16 PE=1 SV=2	RPS16	16445.31	P62249	P62249	23	0
9.54832	8.91756	10.1264	11.5909	10.9194	9.70959	12.9207	10.2885	11.804	10.9753	11.2659	12.1102	12.3965	11.6404	10.4449	10.5635	12.1237	11.9275	Homo sapiens	1314	>sp|P62253|UB2G1_HUMAN Ubiquitin-conjugating enzyme E2 G1 OS=Homo sapiens GN=UBE2G1 PE=1 SV=3	UBE2G1	19509.21	P62253	P62253	2	0.001609788
14.0385	14.023	14.4621	13.9885	14.4578	14.6544	14.4559	14.3574	14.2758	14.2456	14.4144	14.9889	15.1105	14.6037	14.5009	14.7658	15.0961	14.6283	Homo sapiens	1315	>sp|P62256|UBE2H_HUMAN Ubiquitin-conjugating enzyme E2 H OS=Homo sapiens GN=UBE2H PE=1 SV=1	UBE2H	20655.16	P62256	P62256	4	0
17.7853	17.8244	17.9155	17.8208	17.7968	17.9927	17.5953	17.8725	17.7121	18.4872	18.3232	18.294	17.6224	17.6623	17.9589	18.144	18.1681	17.9507	Homo sapiens	1316	>sp|P62258|1433E_HUMAN 14-3-3 protein epsilon OS=Homo sapiens GN=YWHAE PE=1 SV=1	YWHAE	29173.89	P62258	P62258	27	0
19.0246	19.1447	18.8903	19.1061	18.9094	18.9259	18.8967	18.8316	19.3714	17.3122	16.9607	17.2563	17.1224	17.6124	17.6074	17.2495	17.266	16.8978	Homo sapiens	1317	>sp|P62263|RS14_HUMAN 40S ribosomal protein S14 OS=Homo sapiens GN=RPS14 PE=1 SV=3	RPS14	16272.7	P62263	P62263	7	0
16.5447	16.324	16.2849	16.4571	16.5633	16.0056	16.0591	16.4359	16.4713	14.6279	14.3811	14.879	14.7593	15.4206	15.0669	14.7379	14.7082	14.3717	Homo sapiens	1318	>sp|P62266|RS23_HUMAN 40S ribosomal protein S23 OS=Homo sapiens GN=RPS23 PE=1 SV=3	RPS23	15807.55	P62266	P62266	10	0
18.4567	18.7166	18.5858	18.5552	18.4406	18.3663	18.2103	18.3759	18.6639	17.2222	16.9722	16.943	16.8205	17.4659	17.036	16.8939	17.0252	17.221	Homo sapiens	1319	>sp|P62269|RS18_HUMAN 40S ribosomal protein S18 OS=Homo sapiens GN=RPS18 PE=1 SV=3	RPS18	17718.67	P62269	P62269	15	0
15.9137	15.7184	16.1703	15.8937	15.7334	15.7202	15.271	15.8932	15.6696	15.1939	14.6514	15.1026	15.1866	15.7161	15.6843	14.9369	14.7649	14.4381	Homo sapiens	1320	>sp|P62273|RS29_HUMAN 40S ribosomal protein S29 OS=Homo sapiens GN=RPS29 PE=1 SV=2	RPS29	6676.76	P62273	P62273	6	0
16.8317	16.7183	16.6039	16.8042	16.4934	16.3457	16.5873	16.4317	16.6598	14.2157	13.8877	13.309	13.8622	14.3895	14.5944	14.1269	14.0496	14.3624	Homo sapiens	1321	>sp|P62277|RS13_HUMAN 40S ribosomal protein S13 OS=Homo sapiens GN=RPS13 PE=1 SV=2	RPS13	17222.3	P62277	P62277	15	0
17.1696	17.0549	16.8717	17.0948	16.8424	16.7374	16.7146	16.7112	17.1206	15.9072	15.3884	15.7637	15.7377	16.1939	15.8605	15.757	15.6867	15.7112	Homo sapiens	1322	>sp|P62280|RS11_HUMAN 40S ribosomal protein S11 OS=Homo sapiens GN=RPS11 PE=1 SV=3	RPS11	18430.72	P62280	P62280	15	0
13.4243	13.4582	13.9572	13.883	13.9999	13.7395	14.4501	13.1984	14.2348	14.1961	14.5102	13.4418	14.5229	15.3339	14.8549	15.1193	15.3086	16.1989	Homo sapiens	1323	>sp|P62304|RUXE_HUMAN Small nuclear ribonucleoprotein E OS=Homo sapiens GN=SNRPE PE=1 SV=1	SNRPE	10803.6	P62304	P62304	2	0
12.3566	11.8677	12.5539	12.3388	11.6571	12.1058	11.9862	12.1151	11.9448	12.6808	13.1688	12.7043	12.9337	12.6674	12.9489	12.8051	12.7228	12.8361	Homo sapiens	1324	>sp|P62306|RUXF_HUMAN Small nuclear ribonucleoprotein F OS=Homo sapiens GN=SNRPF PE=1 SV=1	SNRPF	9725.19	P62306	P62306	3	0
10.5405	10.3498	10.7304	10.4763	10.4117	11.1049	9.66874	9.63246	10.0387	11.9897	12.6222	11.807	11.0445	9.02548	10.9935	11.6026	11.7899	11.2368	Homo sapiens	1325	>sp|P62310|LSM3_HUMAN U6 snRNA-associated Sm-like protein LSm3 OS=Homo sapiens GN=LSM3 PE=1 SV=2	LSM3	11845.4	P62310	P62310	1	0
13.3176	13.6643	13.8955	13.695	13.7362	13.9015	14.0566	14.1325	12.8122	15.0899	15.2018	14.9471	14.9635	14.8831	14.9529	14.728	15.0196	15.043	Homo sapiens	1326	>sp|P62312|LSM6_HUMAN U6 snRNA-associated Sm-like protein LSm6 OS=Homo sapiens GN=LSM6 PE=1 SV=1	LSM6	9127.57	P62312	P62312	6	0
12.2959	12.6276	12.578	12.6197	12.2603	12.4474	11.1787	11.8034	11.5727	11.8622	11.8897	12.2716	12.5677	12.9484	12.7263	12.3519	12.3932	12.0087	Homo sapiens	1327	>sp|P62314|SMD1_HUMAN Small nuclear ribonucleoprotein Sm D1 OS=Homo sapiens GN=SNRPD1 PE=1 SV=1	SNRPD1	13281.57	P62314	P62314	2	0
16.0196	16.2865	16.1888	16.1608	16.1448	16.1195	16.0687	15.9468	16.0566	16.773	16.595	16.4921	16.3443	16.4808	16.4696	16.6149	16.6858	16.7852	Homo sapiens	1328	>sp|P62316|SMD2_HUMAN Small nuclear ribonucleoprotein Sm D2 OS=Homo sapiens GN=SNRPD2 PE=1 SV=1	SNRPD2	13526.87	P62316	P62316	9	0
13.0958	13.1527	13.4485	13.6161	13.7511	13.7267	14.0221	13.5254	13.9008	13.7421	14.1772	12.5375	13.4156	13.975	14.257	14.0483	14.025	14.8971	Homo sapiens	1329	>sp|P62318|SMD3_HUMAN Small nuclear ribonucleoprotein Sm D3 OS=Homo sapiens GN=SNRPD3 PE=1 SV=1	SNRPD3	13916.24	P62318	P62318	4	0
12.5995	12.4061	12.7426	12.6089	12.8396	13.0665	12.629	13.2996	12.6591	13.1329	13.3981	13.6109	13.8003	13.6225	13.766	13.7872	13.8545	13.4209	Homo sapiens	1330	>sp|P62328|TYB4_HUMAN Thymosin beta-4 OS=Homo sapiens GN=TMSB4X PE=1 SV=2	TMSB4X	5052.65	P62328	P62328	4	0
11.2402	10.8834	11.427	10.795	11.0137	10.3195	11.497	10.9233	10.6237	12.0826	12.7332	12.6143	12.1265	11.3089	11.9782	11.894	11.752	11.3562	Homo sapiens	1331	>sp|P62330|ARF6_HUMAN ADP-ribosylation factor 6 OS=Homo sapiens GN=ARF6 PE=1 SV=2	ARF6	20082.15	P62330	P62330	3	0
16.3059	16.4008	16.241	16.393	16.3255	16.1022	16.0419	16.2353	16.2829	16.2682	16.0296	16.0264	15.9467	16.3799	16.0258	15.9164	15.9075	16.1719	Homo sapiens	1332	>sp|P62333|PRS10_HUMAN 26S protease regulatory subunit 10B OS=Homo sapiens GN=PSMC6 PE=1 SV=1	PSMC6	44172.98	P62333	P62333	23	0
8.95261	7.48773	8.6298	9.44615	8.94163	8.81375	8.90667	8.87672	4.81832	9.52178	9.30086	8.76794	9.7015	9.40957	9.57979	8.5656	8.55304	9.17845	Homo sapiens	1333	>sp|P62341|SELT_HUMAN Selenoprotein T OS=Homo sapiens GN=SELT PE=2 SV=2	SELT	22324.15	P62341	P62341	2	0.003492063
17.6122	17.5669	17.3018	17.7267	17.427	17.2574	17.2771	17.2843	17.6387	15.4748	15.0604	15.1091	15.5905	15.926	15.778	15.4713	15.3237	15.5362	Homo sapiens	1334	>sp|P62424|RL7A_HUMAN 60S ribosomal protein L7a OS=Homo sapiens GN=RPL7A PE=1 SV=2	RPL7A	29995.62	P62424	P62424	21	0
15.7596	15.9399	15.7911	15.731	16.4408	16.0803	16.3958	16.0602	16.3711	16.6668	17.0836	16.7249	16.8959	16.7441	16.9317	16.8012	17.0256	16.952	Homo sapiens	1335	>sp|P62491|RB11A_HUMAN Ras-related protein Rab-11A OS=Homo sapiens GN=RAB11A PE=1 SV=3;>sp|Q15907|RB11B_HUMAN Ras-related protein Rab-11B OS=Homo sapiens GN=RAB11B PE=1 SV=4	RAB11A;RAB11B	24393.52;24488.5	P62491;Q15907	P62491;Q15907	11	0
14.1615	14.2398	14.1098	14.2759	14.28	14.2684	14.3027	14.3208	14.1424	14.4127	14.3592	14.5956	14.3798	14.454	14.307	14.4866	14.4808	14.384	Homo sapiens	1336	>sp|P62495|ERF1_HUMAN Eukaryotic peptide chain release factor subunit 1 OS=Homo sapiens GN=ETF1 PE=1 SV=3	ETF1	49030.89	P62495	P62495	11	0
13.8969	14.0807	14.2613	14.0081	14.2867	14.1293	13.8809	14.0336	14.055	14.5118	14.7217	15.609	15.6765	15.5691	15.1695	15.5728	15.602	15.0484	Homo sapiens	1337	>sp|P62633|CNBP_HUMAN Cellular nucleic acid-binding protein OS=Homo sapiens GN=CNBP PE=1 SV=1	CNBP	19462.7	P62633	P62633	6	0
19.0806	19.1878	19.0366	19.0727	18.8987	18.8096	18.6724	18.8308	19.1112	17.7215	17.3984	17.4889	17.2928	17.8296	17.5523	17.2701	17.3023	17.3662	Homo sapiens	1338	>sp|P62701|RS4X_HUMAN 40S ribosomal protein S4, X isoform OS=Homo sapiens GN=RPS4X PE=1 SV=2	RPS4X	29597.72	P62701	P62701	25	0
19.9019	19.9727	19.6427	19.9727	19.5168	19.5246	19.5608	19.4288	20.1079	18.6297	18.005	18.2607	18.0203	18.5575	18.3331	18.2571	18.2823	18.2822	Homo sapiens	1339	>sp|P62736|ACTA_HUMAN Actin, aortic smooth muscle OS=Homo sapiens GN=ACTA2 PE=1 SV=1;>sp|P63267|ACTH_HUMAN Actin, gamma-enteric smooth muscle OS=Homo sapiens GN=ACTG2 PE=1 SV=1	ACTA2;ACTG2	42008.95;41876.87	P62736;P63267	P62736;P63267	3	0
7.54853	8.417	13.3231	12.5151	14.5711	14.4481	13.8042	13.9427	14.2115	13.9093	14.3976	13.4844	17.0654	14.5492	16.5212	16.17	14.9513	15.5157	Homo sapiens	1340	>sp|P62745|RHOB_HUMAN Rho-related GTP-binding protein RhoB OS=Homo sapiens GN=RHOB PE=1 SV=1	RHOB	22123.38	P62745	P62745	2	0
18.0908	18.1916	17.8099	18.1156	17.9965	17.6779	17.7073	17.8093	18.0211	15.7728	15.5749	16.3196	15.9112	16.303	15.8336	16.1554	16.1769	15.7939	Homo sapiens	1341	>sp|P62750|RL23A_HUMAN 60S ribosomal protein L23a OS=Homo sapiens GN=RPL23A PE=1 SV=1	RPL23A	17695.06	P62750	P62750	17	0
18.1561	18.2021	17.7408	18.0917	18.1855	17.8599	17.8685	17.9522	18.3814	16.2428	16.0529	16.786	16.3893	16.9851	16.3127	16.3272	16.4305	16.1152	Homo sapiens	1342	>sp|P62753|RS6_HUMAN 40S ribosomal protein S6 OS=Homo sapiens GN=RPS6 PE=1 SV=1	RPS6	28680.64	P62753	P62753	16	0
16.7085	16.9149	16.1033	16.3256	16.8105	15.2197	16.4853	16.7991	15.6184	16.9846	16.874	15.6736	15.477	15.8462	16.1108	16.4384	16.4883	17.2699	Homo sapiens	1343	>sp|P62805|H4_HUMAN Histone H4 OS=Homo sapiens GN=HIST1H4A PE=1 SV=2	HIST1H4A	11367.34	P62805	P62805	9	0
17.2352	17.426	17.6988	17.2792	17.7827	17.928	17.6873	17.8799	17.8961	17.1196	17.7769	17.5226	17.8855	17.8188	17.7264	17.5587	17.9021	17.7818	Homo sapiens	1344	>sp|P62820|RAB1A_HUMAN Ras-related protein Rab-1A OS=Homo sapiens GN=RAB1A PE=1 SV=3	RAB1A	22677.75	P62820	P62820	9	0
19.2182	19.3055	19.3626	19.224	19.3128	19.3765	19.0437	19.3422	19.284	19.2487	19.3239	19.3946	19.2305	19.3947	19.2644	19.2904	19.2982	19.2341	Homo sapiens	1345	>sp|P62826|RAN_HUMAN GTP-binding nuclear protein Ran OS=Homo sapiens GN=RAN PE=1 SV=3	RAN	24423.1	P62826	P62826	17	0
16.9585	16.732	16.5467	16.9398	16.368	16.3499	16.6855	16.3475	16.7391	15.3957	15.0252	15.7436	15.6452	16.0691	15.7932	15.6609	15.551	15.1367	Homo sapiens	1346	>sp|P62829|RL23_HUMAN 60S ribosomal protein L23 OS=Homo sapiens GN=RPL23 PE=1 SV=1	RPL23	14865.44	P62829	P62829	9	0
12.719	13.0484	12.9044	12.8307	12.8008	13.0879	13.3726	13.066	13.1314	13.5816	13.7991	13.6754	13.56	13.3414	13.6281	13.3981	13.6035	13.3384	Homo sapiens	1347	>sp|P62834|RAP1A_HUMAN Ras-related protein Rap-1A OS=Homo sapiens GN=RAP1A PE=1 SV=1	RAP1A	20987.18	P62834	P62834	1	0
16.4946	16.6546	16.4207	16.7848	16.6349	16.4274	16.2718	16.4907	16.4929	14.5317	14.558	14.8848	14.9847	15.3433	14.7215	14.9192	14.8126	14.9684	Homo sapiens	1348	>sp|P62841|RS15_HUMAN 40S ribosomal protein S15 OS=Homo sapiens GN=RPS15 PE=1 SV=2	RPS15	17040.1	P62841	P62841	12	0
14.0647	13.9077	13.6732	14.0031	13.6275	13.721	13.8253	13.6795	13.8678	11.2124	11.5408	11.6569	11.7127	12.1299	11.1601	11.5163	11.6586	12.0684	Homo sapiens	1349	>sp|P62847|RS24_HUMAN 40S ribosomal protein S24 OS=Homo sapiens GN=RPS24 PE=1 SV=1	RPS24	15423.19	P62847	P62847	8	0
18.9295	19.1033	18.8529	18.9332	18.831	18.6221	18.4983	18.6854	18.9251	17.4869	17.4404	17.9957	17.265	17.782	17.2044	17.4277	17.5873	17.2945	Homo sapiens	1350	>sp|P62851|RS25_HUMAN 40S ribosomal protein S25 OS=Homo sapiens GN=RPS25 PE=1 SV=1	RPS25	13742.13	P62851	P62851	7	0
18.7083	18.7274	18.4105	18.6357	18.5228	18.2426	18.3023	18.1603	18.6469	16.6037	16.1268	16.591	16.7976	17.5636	16.9291	16.8965	16.8939	16.9209	Homo sapiens	1351	>sp|P62854|RS26_HUMAN 40S ribosomal protein S26 OS=Homo sapiens GN=RPS26 PE=1 SV=3	RPS26	13015.42	P62854	P62854	6	0
17.6522	17.5373	17.7896	17.5551	17.5227	17.8661	17.7001	17.6162	17.5442	18.0772	18.411	18.295	18.1611	17.7994	18.0201	18.3247	18.2783	18.2107	Homo sapiens	1352	>sp|P62857|RS28_HUMAN 40S ribosomal protein S28 OS=Homo sapiens GN=RPS28 PE=1 SV=1	RPS28	7841.02	P62857	P62857	3	0
17.0813	17.2099	16.9135	17.1362	17.1411	16.7037	16.7976	17.0956	17.0328	16.4054	16.0594	15.9976	16.347	16.734	16.4108	16.1926	16.0779	16.4998	Homo sapiens	1353	>sp|P62873|GBB1_HUMAN Guanine nucleotide-binding protein G(I)/G(S)/G(T) subunit beta-1 OS=Homo sapiens GN=GNB1 PE=1 SV=3	GNB1	37376.96	P62873	P62873	11	0
13.0045	7.56294	8.67537	12.629	13.0027	8.38025	7.73624	8.09207	12.9705	15.5378	15.1801	15.0407	15.0833	15.7373	15.4806	15.1102	15.1228	15.3645	Homo sapiens	1354	>sp|P62877|RBX1_HUMAN E3 ubiquitin-protein ligase RBX1 OS=Homo sapiens GN=RBX1 PE=1 SV=1	RBX1	12273.95	P62877	P62877	1	0
18.3901	18.5403	18.0921	18.6185	18.1664	18.0116	17.987	18.0295	18.1747	17.436	17.0471	17.528	17.3449	17.4834	17.0567	17.2331	17.2739	17.3245	Homo sapiens	1355	>sp|P62888|RL30_HUMAN 60S ribosomal protein L30 OS=Homo sapiens GN=RPL30 PE=1 SV=2	RPL30	12784.05	P62888	P62888	10	0
13.6564	13.4987	13.491	13.2849	13.1766	12.9725	12.8801	13.1967	13.2278	12.2677	11.6641	11.9312	11.8561	12.417	12.401	11.4982	11.7266	11.3827	Homo sapiens	1356	>sp|P62891|RL39_HUMAN 60S ribosomal protein L39 OS=Homo sapiens GN=RPL39 PE=1 SV=2;>sp|Q59GN2|R39L5_HUMAN Putative 60S ribosomal protein L39-like 5 OS=Homo sapiens GN=RPL39P5 PE=5 SV=2	RPL39;RPL39P5	6406.67;6322.59	P62891;Q59GN2	P62891;Q59GN2	1	0
18.6245	18.84	18.6648	18.7057	18.7979	18.5857	18.3306	18.5596	18.7012	16.8761	16.5844	16.1459	16.7951	17.2506	17.0863	16.8884	17.0019	17.4661	Homo sapiens	1357	>sp|P62899|RL31_HUMAN 60S ribosomal protein L31 OS=Homo sapiens GN=RPL31 PE=1 SV=1	RPL31	14462.86	P62899	P62899	11	0
17.7705	17.8469	17.7659	17.7535	17.5072	17.1935	17.2208	17.3601	17.5216	16.3144	15.9538	16.2915	15.9047	16.3992	16.1768	15.9234	15.72	15.6395	Homo sapiens	1358	>sp|P62906|RL10A_HUMAN 60S ribosomal protein L10a OS=Homo sapiens GN=RPL10A PE=1 SV=2	RPL10A	24831.3	P62906	P62906	16	0
17.9207	18.0727	18.0174	18.0033	18.0517	17.6602	17.641	17.9504	18.0422	16.1521	15.9591	15.6669	16.0864	16.7069	16.3473	16.1381	16.2605	16.6374	Homo sapiens	1359	>sp|P62910|RL32_HUMAN 60S ribosomal protein L32 OS=Homo sapiens GN=RPL32 PE=1 SV=2	RPL32	15859.8	P62910	P62910	14	0
17.798	18.0185	17.781	17.8192	17.7048	17.6095	17.4136	17.6144	17.7682	16.9531	16.8023	17.3973	16.7177	17.1772	16.7965	16.9257	16.9969	16.5926	Homo sapiens	1360	>sp|P62913|RL11_HUMAN 60S ribosomal protein L11 OS=Homo sapiens GN=RPL11 PE=1 SV=2	RPL11	20252.38	P62913	P62913	11	0
19.1698	19.284	19.1596	19.0986	19.1987	18.5984	18.5852	19.0508	19.1598	16.9641	16.682	16.6524	16.8395	17.4944	17.1185	16.7786	16.8887	17.0528	Homo sapiens	1361	>sp|P62917|RL8_HUMAN 60S ribosomal protein L8 OS=Homo sapiens GN=RPL8 PE=1 SV=2	RPL8	28024.65	P62917	P62917	20	0
18.5659	18.7341	18.7408	18.8027	19.0189	18.838	19.38	19.0203	19.3134	19.1868	19.4834	19.3271	19.2977	18.9434	19.1006	19.1379	19.4565	19.3251	Homo sapiens	1362	>sp|P62937|PPIA_HUMAN Peptidyl-prolyl cis-trans isomerase A OS=Homo sapiens GN=PPIA PE=1 SV=2	PPIA	18012.49	P62937	P62937	15	0
13.2229	13.09	12.733	13.3067	13.4543	13.1476	13.8063	13.4464	13.7123	13.1144	12.9573	10.6443	12.8342	12.229	13.9424	13.0969	13.1592	14.1088	Homo sapiens	1363	>sp|P62942|FKB1A_HUMAN Peptidyl-prolyl cis-trans isomerase FKBP1A OS=Homo sapiens GN=FKBP1A PE=1 SV=2	FKBP1A	11950.7	P62942	P62942	3	0
17.1254	17.1438	17.067	17.2519	17.4355	17.3834	17.322	17.3037	17.703	16.6787	16.6946	17.1687	17.9029	17.4772	17.0243	18.1529	18.317	18.4186	Homo sapiens	1364	>sp|P62979|RS27A_HUMAN Ubiquitin-40S ribosomal protein S27a OS=Homo sapiens GN=RPS27A PE=1 SV=2	RPS27A	17964.91	P62979	P62979	9	0
12.794	12.3308	12.6509	13.2674	12.1691	12.6826	12.1675	12.328	12.3614	11.75	12.3055	12.6482	13.226	13.2873	12.8329	12.8644	12.8705	12.6708	Homo sapiens	1365	>sp|P62987|RL40_HUMAN Ubiquitin-60S ribosomal protein L40 OS=Homo sapiens GN=UBA52 PE=1 SV=2	UBA52	14728.31	P62987	P62987	2	0
14.2243	14.5083	14.6752	14.4363	14.9821	14.9285	14.9115	14.9265	14.8544	14.9631	15.3125	15.2331	15.7223	15.5303	15.5204	15.7649	15.8945	15.8404	Homo sapiens	1366	>sp|P62993|GRB2_HUMAN Growth factor receptor-bound protein 2 OS=Homo sapiens GN=GRB2 PE=1 SV=1	GRB2	25206.35	P62993	P62993	10	0
13.957	14.7867	15.1122	14.0859	13.4495	13.8425	12.8447	13.2268	13.6699	13.8628	13.3045	12.6209	13.3649	13.7451	14.2103	12.9824	12.9301	13.2637	Homo sapiens	1367	>sp|P62995|TRA2B_HUMAN Transformer-2 protein homolog beta OS=Homo sapiens GN=TRA2B PE=1 SV=1	TRA2B	33665.67	P62995	P62995	8	0
14.9584	15.1861	14.9821	15.0205	15.3323	15.2804	15.3107	15.2656	14.8014	15.7409	15.8526	15.9773	16.0502	15.9241	15.9898	15.9213	16.0307	15.7927	Homo sapiens	1368	>sp|P63000|RAC1_HUMAN Ras-related C3 botulinum toxin substrate 1 OS=Homo sapiens GN=RAC1 PE=1 SV=1	RAC1	21450.1	P63000	P63000	6	0
15.2009	15.3301	15.142	15.4037	15.3634	15.131	15.2331	15.2083	15.3173	15.0773	14.8594	14.8732	15.0112	15.3022	15.0862	14.9927	14.9476	15.1358	Homo sapiens	1369	>sp|P63010|AP2B1_HUMAN AP-2 complex subunit beta OS=Homo sapiens GN=AP2B1 PE=1 SV=1	AP2B1	104552.56	P63010	P63010	26	0
[truncated: 1,783 more rows]
